# Supplementary material for: New nicotinamide–thiadiazol hybrids as VEGFR-2 inhibitors for breast cancer therapy: design, synthesis and in silico and in vitro evaluation
Source: Royal Society of Chemistry journal article supplement (doi:10.1039/d5ra01223f), 2025-01-01
Supplement: d5ra01223f2.pdf [file d5ra01223f2.pdf]

| Content                              |
|--------------------------------------|
| <b>S1. Chemistry</b>                 |
| <b>S2. Biological testing</b>        |
| <b>S.3. <i>In silico</i> studies</b> |
| <b>S.4. Spectral data</b>            |

| Lab code | Paper code |
|----------|------------|
| WN-5     | <b>7a</b>  |
| WN-4     | <b>7b</b>  |
| WN-13    | <b>7c</b>  |
| WN-6     | <b>7d</b>  |
| WN-15    | <b>7e</b>  |
| WN-17    | <b>7f</b>  |
| WN-16    | <b>7g</b>  |

### S.1. Chemistry

The chemicals, reagents, and reaction solvents used in this study were gained from Sigma-Aldrich, Alpha Chem, Fluka, and Loba and were not purified further. The melting points (mp), which have not been corrected, were measured using the SMP50 Digital Melting Point App provided by Bibby Scientific in Staffordshire. A Thermo Fisher Nicolet IS10 spectrophotometer was used to detect infrared spectra as solids on the potassium bromide disc ( $\nu_{\max}$  in  $\text{cm}^{-1}$ ) with a resolution of  $4.0 \text{ cm}^{-1}$ , covering  $4000\text{-}400 \text{ cm}^{-1}$ .  $^1\text{H-NMR}$  and  $^{13}\text{C-NMR}$  spectra (400 and 101 MHz) were recorded at the JNM-ECA 500 II Made by JEOL-JAPAN instrument through a solution of deuterated dimethyl sulfoxide. Proton chemical shifts are labeled in part per million (ppm), downfield from tetramethyl silane (TMS,  $\delta=0$ ) as an internal standard, and the following abbreviations (or a combination thereof) are used to describe splitting patterns: s, singlet; d, doublet; t, triplet; q, quartet; m, multiplet, and br, broad. Mass spectra were measured with a Thermo Scientific GCMS model (Isq Lt) using the Thermo X-Calibur software (Shimadzu, Kyoto, Japan) at the Regional Center for Mycology and Biotechnology (RCMB), Al-Azhar University, Nasr City, Cairo, Egypt. Elemental studies were conducted at the Regional Center for Microbiology and Biotechnology, Al-Azhar University, Cairo, Egypt, with results accurate to within 0.4%. Thin-layer chromatography (TLC) was carried out on silica gel plates by using DCM:

MeOH (95:5%), as the eluting system. The progress of the reaction and evaluation of product purity was determined using a UV indicator at 254 nm.

## **S2. Biological testing**

### **S.2.1. *In vitro* anti-proliferative activity**

#### Materials and methods

##### Cell line

Mammary gland breast cancer (MCF-7) and (MDA-MB-231) . The cell line was obtained from ATCC via Holding company for biological products and vaccines (VACSERA), Cairo, Egypt.

Sorafenib was used as a standard anticancer drug for comparison.

##### Chemical reagents

The reagents RPMI-1640 medium , MTT and DMSO (sigma co., St. Louis, USA), Fetal Bovine serum (GIBCO, UK) .

##### MTT assay

The cell lines mentioned above were used to determine the inhibitory effects of compounds on cell growth using the MTT assay. This colorimetric assay is based on the conversion of the yellow tetrazolium bromide (MTT) to a purple formazan derivative by mitochondrial succinate dehydrogenase in viable cells. Cell lines were cultured in RPMI-1640 medium with 10% fetal bovine serum. Antibiotics added were 100 units/ml penicillin and 100µg/ml streptomycin at 37 C in a 5% CO<sub>2</sub> incubator. The cell lines were seeded in a 96-well plate at a density of  $1.0 \times 10^4$  cells/well. at 37 C for 48 h under 5% CO<sub>2</sub>. After incubation the cells were treated with different concentration of compounds and incubated for 24 h. After 24 h of drug treatment, 20 µl of MTT solution at 5mg/ml was added and incubated for 4 h. Dimethyl sulfoxide (DMSO) in volume of 100 µl is added into each well to dissolve the purple formazan formed. The colorimetric assay is measured and recorded at absorbance of 570 nm using a plate reader (EXL 800 ,USA). The relative cell viability in percentage was calculated as (A<sub>570</sub> of treated samples/A<sub>570</sub> of untreated sample) X 100.

**\*Dose response curves**

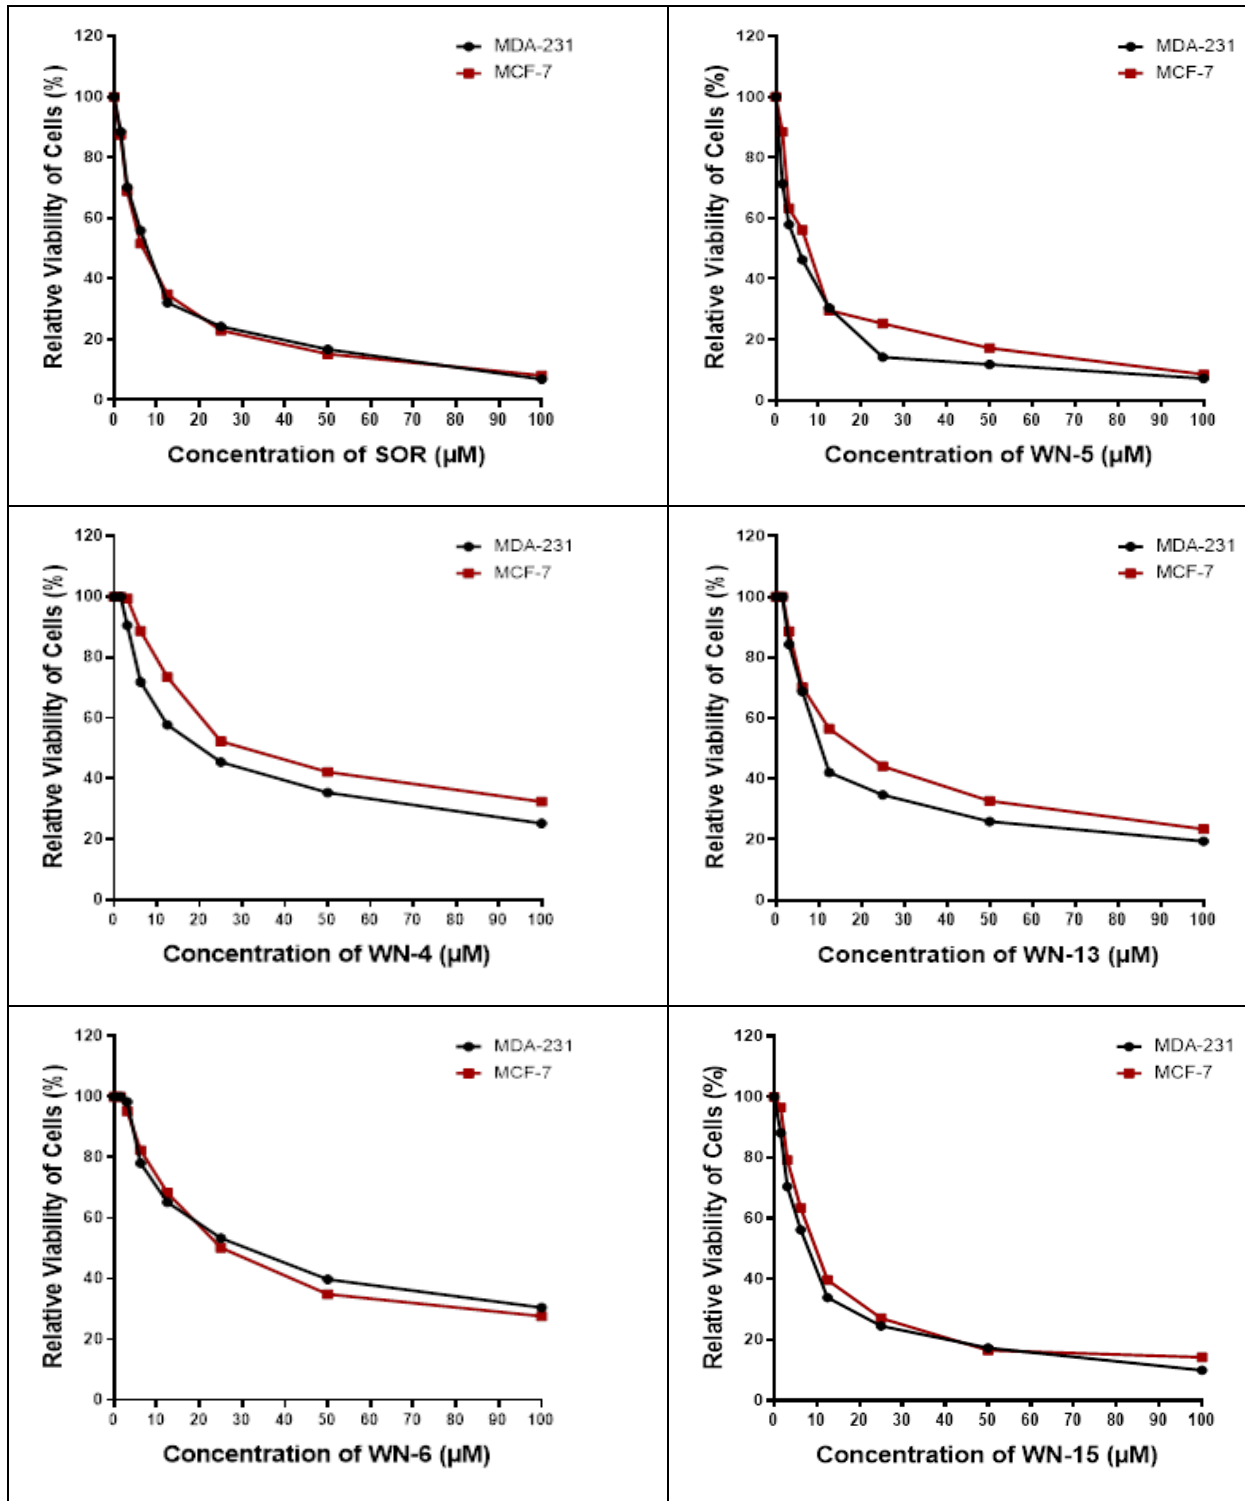

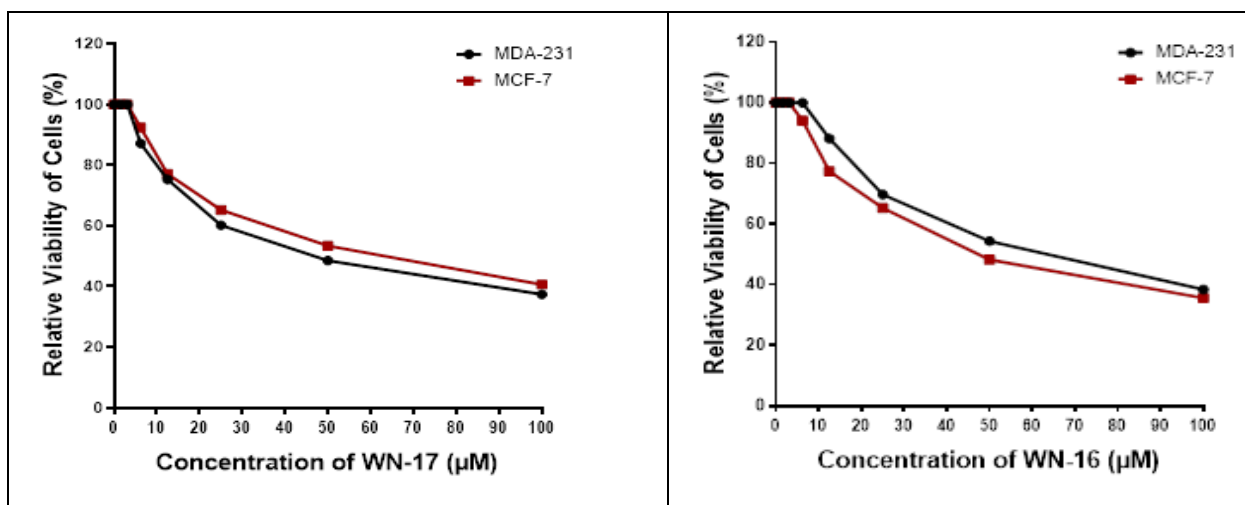

### S.2.2. Safety assay

#### Materials and methods

##### Cell line

Human lung fibroblast cell line (WI-38) and Human amnion (WISH). The cell line was obtained from ATCC via Holding company for biological products and vaccines (VACSERA), Cairo, Egypt.

##### Chemical reagents

The reagents RPMI-1640 medium, MTT and DMSO (sigma co., St. Louis, USA), Fetal Bovine serum (GIBCO, UK).

Sorafenib was used as a standard anticancer drug for comparison.

##### MTT assay

The different cell line mentioned above were used to determine the inhibitory effects of compounds on cell growth using the MTT assay. This colorimetric assay is based on the conversion of the yellow tetrazolium bromide (MTT) to a purple formazan derivative by mitochondrial succinate dehydrogenase in viable cells. The cells were cultured in RPMI-1640 medium with 10% fetal bovine serum. Antibiotics added were 100 units/ml penicillin and 100μg/ml streptomycin at 37 C in a 5% CO<sub>2</sub> incubator. The cells were seeded in a 96-well plate at a density of  $1.0 \times 10^4$  cells/well at 37 C for 48 h under 5% CO<sub>2</sub>. After incubation the cells were treated with different concentration of compounds and incubated for 24 h. After 24 h of drug treatment, 20 μl of MTT solution at 5mg/ml was added and incubated for 4 h. Dimethyl sulfoxide (DMSO) in volume of 100μl is added into each well to dissolve the purple formazan formed. The colorimetric assay is measured and

recorded at absorbance of 570nm using a plate reader (EXL 800, USA). The relative cell viability in percentage was calculated as (A570 of treated samples/A570 of untreated sample) X 100.

#### \*Dose response curves

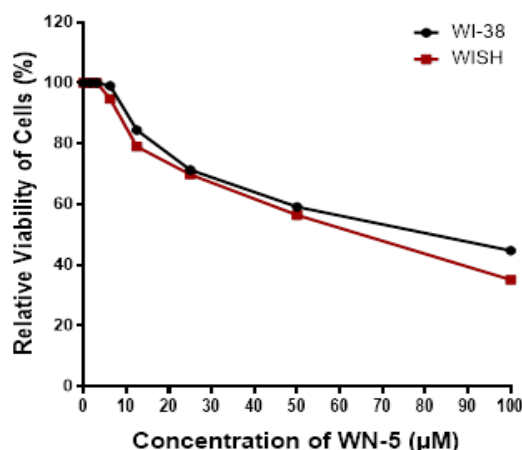

#### S.2.4. *In vitro* VEGFR-2 inhibition

- The *in vitro* inhibitory activity of the tested compounds against **VEGFR-2** was accomplished using Kinase Assay Kit (BPS Bioscience, USA) at different concentrations 1, 0.1, and 0.01 μM.
- The activities of Kinases were observed by measuring chemiluminescence using BioTek™ Synergy2 Microplate Reader (BioTek, USA).
- Different standards were used.
- All samples and controls were verified in triplicates to calculate the concentration that caused 50% inhibition of the kinase activity.

#### S.2.5. Cell cycle analysis

This assay was conducted according to the reported methods. In short, MDA-MB-231 cells were seeded into six-well plates ( $2 \times 10^5$  cells per each well) and incubated for 24 h at 37 °C and 5% CO<sub>2</sub>. After that, they were treated with 4.64 μM of compound **7a** dissolved in DMSO (1% v/v) for 48 h. After the cells were washed several times with cold phosphate buffered saline (PBS), fixed with ethyl alcohol (70%) and rinsed again with PBS, they were stained with the DNA fluorochrome propidium iodide and kept at 37 °C for 15 min in the

dark. The cell distribution was analyzed using Epics XL-MCL™ Flow Cytometer (Beckman Coulter), and the data were analyzed using Flowing software (version 2.5.1, Turku Centre for Biotechnology, Turku, Finland).

#### **S.2.6. Apoptosis analysis**

Apoptosis detection was carried out using Annexin V fluorescein isothiocyanate (V-FITC)/PI kit according to the reported procedures. MDA-MB-231 cells were seeded and incubated for 24 h, then treated with (4.64  $\mu$ M) of compound **7a** for 48 h. The cells were then collected, washed 3 times with PBS, fixed with ice-cold absolute ethanol (70%) and stained with Annexin-V-FITC/propidium iodide (PI) using a double staining kit for 20 min in the dark. Epics XL-MCL™ Flow Cytometer was used to evaluate the apoptosis.

#### **S.2.7. *In vitro* assay for BAX, Bcl-2, and caspase-3**

MDA-MB-231 cells were cultured in suspension in complete culture medium (CCM) of RPMI 1640 culture medium (PAA; Pasching, Austria) containing 10% foetal bovine serum (FBS; PAA) and 1% penicillin/streptomycin (GIBCO, Invitrogen, Paisley, UK) into an incubator at 37 °C with 5% CO<sub>2</sub>. Cells were cultured at a ratio of 0.2  $10^6$  cells/well in 96-wells plates and differentiated into macrophage-like cells with 10 ng/mL phorbol myristate acetate (PMA; Sigma Chemical Co.) for a period of 24 h. Cells rested then in CCM without PMA for another 24 h. After differentiation and resting periods, vehicle (DMSO; MERK, Whitehouse Station, NJ, USA) as control and compound **7a** (at a concentration of 4.64  $\mu$ M) were added to each well and plates were pre-incubated at 37 °C with 5% CO<sub>2</sub> for 72 h.

Supernatants from *in vitro* assays were harvested and assayed for BAX, Bcl-2, and caspase-3 using an enzyme-linked immunosorbent assay (ELISA) kit following the manufacturer's instructions. For caspase-3, DRG® Caspase-3 (human) ELISA (EIA-4860) was used. For BAX and Bcl2, DRG® Human Bax ELISA (EIA-4487) (DRG International, Inc., USA), and Zymed® Bcl-2 ELISA Kit (Invitrogen Corporation, 1600 Faraday Avenue, Carlsbad, CA, USA) were used. The absorbance in each well was measured with a microplate reader at 450 nm and corrected at 570 nm. Concentrations of the tested proteins were obtained and the percentage of activation and/or inhibition as compared to control conditions.

### S3. *In silico* studies

#### S.3.1. Docking studies

**Protein Preparation:** The crystal structure of VEGFR-2 [PDB ID: 4ASD, resolution: 2.03 Å] was obtained from Protein Data Bank (<https://www.rcsb.org>). At first, the crystal structure of the VEGFR-2 complexed with the co-crystallized ligand was prepared by removing crystallographic water molecules. Only one chain was retained besides the co-crystallized ligand. The selected protein chain was protonated using the following setting. The used electrostatic functional form was GB/VI with a distance cut-off of 15 Å. The used value of the dielectric constant was 2 with an 80 dielectric constant of the used solvent. The used Van der Waals functional form was 800R3 with a distance cut-off of 10 Å. Then, the energy of the protein chain was minimized using Hamiltonian AM1 implanted in Molecular Operating Environment (MOE 2019 and MMFF94x (Merck molecular force field) for structural optimization. Next, the active site of the target protein was defined for ligand docking and redocking (in case of validation of docking protocol). The active site of the protein was identified as the residues that fall within the 5 Å distance from the perimeter of the co-crystallized ligand.

**Ligand Preparation:** 2D structures of the synthesized compounds and the standard compound, sorafenib were drawn using ChemBioDraw Ultra 6.0 and saved in MDL-SD file format. The 3D structures of the ligands were protonated, and the structures were optimized by energy minimization using MM2 force-field and 10000 iteration steps of 2 fs. The conformationally optimized ligands were used for docking studies.

**Docking Setup and Validation of Docking Protocol:** The protein-ligand docking studies were carried out using MOE version 2019. Validation of the docking protocol was carried out by redocking the co-crystallized reference ligand against the isolated pocket of VEGFR-2. The docking protocol was validated by comparing the heavy atoms RMSD value of the re-docked ligand pose with the corresponding co-crystallized reference ligand structure.

The docking setup for the tested compounds was established according to the protocol followed in the validation step. For each docking run, 30 docked solutions were generated using ASE for scoring function and rigid receptor for refinement. The pose with ideal binding mode was selected for further investigations. The docking results were visualized using Discovery Studio (DS) 4.0. Analysis of the docking results was carried out by comparing the interactions and docking score obtained for the docked ligands with that of the re-docked reference molecule.

### S.3.2. MD simulations

#### Molecular Dynamic (MD) Simulation:

An unbiased molecular dynamics (MD) simulation was used to evaluate the binding affinity and stability of the VEGFR-2\_7a complex. A 200 ns trajectory was made for the system using GROMACS 2021. CHARMM-GUI solution builder was used to prepare starting files. The system was solvated using water molecules with a transferable intermolecular potential of three points (TIP3P) in a 10 nm cubic box with a buffer distance of 1 nm. Neutralization was achieved by adding NaCl ions at a concentration of 0.154 M. The CHARMM36m force field was used for the VEGFR-2 protein, TIP3P water, and ions.

All simulation dimensions employed periodic boundary conditions. Potential energy minimization with the steepest descent method was first performed to remove steric conflicts. When the highest force on any atom fell below 100 kJ/(mol·nm) or after 100,000 steps, convergence was reached. Thermodynamic equilibrium was the aim of the two-step equilibration procedure. The average temperature in the first stage (NVT ensemble) was maintained at 310 K by the Velocity Rescale thermostat. The second stage (NPT ensemble) used the Berendsen barostat to regulate pressure at 1 atm and the Velocity Rescale algorithm to maintain a temperature of 310 K. A Parrinello-Rahman barostat was used to regulate pressure at 1 atm, and a Nose-Hoover thermostat was used for temperature control in the production run (NPT ensemble). The hydrogen atom bond lengths were maintained with the LINear Constraint Solver (LINCS) method. Using a 1.2 nm cutoff, the Particle Mesh Ewald (PME) approach was used to calculate electrostatic interactions.

The leap-frog integrator propagated the Newtonian equations of motion using time steps of 1 fs for equilibration and 2 fs for production. Two thousand simulation frames were obtained at intervals of 0.1 ns.

After periodic boundary conditions were eliminated and protein integrity was restored, VMD TK scripts were used to analyse the trajectories. Many calculations were performed, such as the Root Mean Square Deviation (RMSD) of the VEGFR-2 backbone and the ligand system 7a. Other structural features that were evaluated included the number of hydrogen bonds between ligands and proteins, center of mass distances between ligands and proteins, radius of gyration (RoG), solvent accessible surface area (SASA), and root mean square fluctuation (RMSF). Protein-Ligand Interaction Fingerprints (ProLIF), a Python program, assesses interactions between ligands and amino acids quantified and characterized the frequency and type of interactions in each frame.



### Binding free energy calculation using MM-GBSA:

The ligands' binding free energies were ascertained by applying the Molecular Mechanics/Generalized Born Surface Area (MM-GBSA) method through the gmx\_MMPBSA program. To determine the contributing amino acids within a 1 nm radius of the ligand, a decomposition analysis was carried out. The ionic strength of 0.154 M and the solvation parameter (igb) of 5 were used in the simulations. The values of 1.0 and 78.5 were selected for the internal and external dielectric constants, respectively. Equation 1 describes in detail the basic free energy calculation approach.

$$\Delta G = \langle G_{\text{complex}} - (G_{\text{receptor}} + G_{\text{ligand}}) \rangle \quad \text{Equation 1}$$

where  $\langle \rangle$  is the mean of the enclosed free energy of the ligand, complex, and receptor throughout the computation frames. We employed the entire route (a total of 2000 frames) in our method. Equations 2 through 6 can be used to compute various energy terms in the following ways:

$$\Delta G_{\text{binding}} = \Delta H - T\Delta S \quad \text{Equation 2}$$

$$\Delta H = \Delta E_{\text{gas}} + \Delta E_{\text{sol}} \quad \text{Equation 3}$$

$$\Delta E_{\text{gas}} = \Delta E_{\text{ele}} + \Delta E_{\text{vdW}} \quad \text{Equation 4}$$

$$\Delta E_{\text{solv}} = E_{\text{GB}} + E_{\text{SA}} \quad \text{Equation 5}$$

$$E_{\text{SA}} = \gamma \cdot \text{SASA} \quad \text{Equation 6}$$

Where:

$\Delta H$  is the enthalpy which can be calculated from gas-phase energy ( $E_{\text{gas}}$ ) and solvation-free energy ( $E_{\text{sol}}$ ).  $-T\Delta S$  is the entropy contribution to the free binding energy.  $E_{\text{gas}}$  is composed of electrostatic and van der Waals terms;  $E_{\text{ele}}$ ,  $E_{\text{vdW}}$ , respectively.  $E_{\text{sol}}$  can be calculated from the polar solvation energy ( $E_{\text{GB}}$ ) and nonpolar solvation energy ( $E_{\text{SA}}$ ) which is estimated from the solvent-accessible surface area.

### Principal Component Analysis:

The mobility of the  $\alpha$ -carbon of VEGFR-2 was evaluated using Principal Component Analysis (PCA) and the mass-weighted covariance matrix (C). The final equilibrium frame of the VEGFR-2\_7a system for combined analysis (for the free energy landscape) and the final equilibrium frame of each trajectory for individual trajectories are referred to during the alignment process. Using gmx covar to diagonalize the

covariance matrix in GROMACS, eigenvectors representing the dominating atomic motions were found. Eigenvalues indicated the amount of motion; the first principal component captured the largest variance, while the contributions from the other components decreased. The `gmx anaeig` command was utilized for analysis with GROMACS. We computed the dimensions of the critical subspace using three parameters. 1) The variance gathered by each additional eigenvector was visualized, and the cumulative sum of the eigenvalues was calculated using extra eigenvectors. Furthermore, 2) a scree plot was generated, which displayed each eigenvalue in relation to its corresponding eigenvector index. The index with the largest slope reduction indicated the critical subspace size. Moreover, 3) the distribution of the eigenvectors was evaluated.

When a distribution other than a Gaussian distribution emerged, it indicated that the corresponding eigenvectors had meaningful dynamics.

We computed the cosine content ( $c_i$ ) of each eigenvector of the C matrix, which may take values ranging from 0 (no cosine) to 1 (perfect cosine). The following is the cosine content equation:

$$c_i = \frac{2}{T} \left( \int \cos(i\pi t) p_i(t) dt \right)^2 \left( \int p_i^2(t) dt \right)^{-1}$$

Where T is the time of the simulation. Abnormally large  $c_i$  values, which represent random motion, are related to insufficient sampling. When the cosine content of the first few PCs is near 1, the behavior of proteins on a large scale is analogous to diffusion. Accordingly, the first 10 PCs were used to calculate their cosine content.

### **Free Energy Landscape (FEL):**

A protein's free-energy landscape (FEL) can be used to determine the different conformations it can adopt, which is necessary to understand the protein's dynamics and function. In this investigation, conformational sampling methods are often used, such as molecular dynamics (MD) simulations, which mimic the intrinsic temperature changes in proteins over time. Here, we have revealed the FEL of our protein of interest through molecular dynamics simulations. To improve its visual appeal, we projected this complex onto two chosen response coordinates. The free energy ( $G\alpha$ ) of the protein in a state described by these coordinates is related to the probability of detecting the protein in that state via the exponential relationship  $e^{-G\alpha/kT}$ . These computations can be used to determine the entire FEL:

$$G\alpha = -kT \ln\left(\frac{P(q_\alpha)}{P_{\max}(q)}\right)$$

Where  $k$  is the Boltzmann constant,  $T$  is the temperature of simulation,  $P(q_\alpha)$  is an estimate of the probability density function obtained from a histogram of the MD data and  $P_{\max}(q)$  is the probability of the most probable state. We derived two-dimensional representations of the free-energy landscapes by considering two separate reaction coordinates:  $q_i$  and  $q_j$ . These representations were obtained by analyzing the joint probability distributions, referred to as  $P(q_i, q_j)$ , which describe the system. The GROMACS `gmx sham` command was utilized for this purpose.

### S.3.4. Density Function Theory (DFT) calculations

#### DFT calculations

The Gaussian 9 package under B3LYP/6-311+G (d, p) level has been used to calculate density function theory (DFT). Several tools have been used, including Avogadro, GaussView 0.3, and Multiwfn. The following formulas were used to calculate the reactivity descriptors: ionization energy (I), chemical potential ( $\mu$ ), electron affinity (A), electrophilicity ( $\chi$ ), maximal charge acceptance ( $\Delta N_{\max}$ ), softness ( $\sigma$ ), and hardness ( $\eta$ ):

$$IP = -E_{\text{HOMO}}$$

$$EA = -E_{\text{LUMO}}$$

$$\mu = (IP + EA)/2$$

$$\eta = (IP - EA)$$

$$\chi = -\mu$$

$$\omega = \mu^2 / (2\eta)$$

$$\sigma = 1/\eta$$

$$\Delta N = -(\mu/\eta)$$

$$\Delta E = -\omega$$

$$E_{\text{gap}} = E_{\text{LUMO}} - E_{\text{HOMO}}$$

### S.3.5. ADMET studies

ADMET descriptors (absorption, distribution, metabolism, excretion and toxicity) of the compounds were determined using Discovery studio 4.0. Sorafenib was used as a reference molecule. At first, the CHARMM force field was applied then the tested compounds were prepared and minimized according to the preparation of small molecule protocol.

- **Preparation of the tested compounds:**

In this protocol, the general-purpose panel was utilized with the activation of the Prepare ligand option. The change ionization was switched on the true option using the Rule based as an ionization method. In Rule based task, we used the carboxylate as an acid ionization. Additionally, the primary, secondary, and tertiary amines were selected as Base ionization. The ionization enumeration option was switched on the one protomer. Under the filter smart option, we selected all options. The false option was selected for tasks Generate tautomers, generate isomers, Fix bad valencies, and parallel processing. The generate coordinates task was switched on the 3D option. Finally, the duplicate structure task was activated on the remove option.

- **Running of ADMET protocol**

In this protocol, the small molecules panel was utilized with the activation of the ADMET descriptors option. Then, we selected the prepared compounds as the input ligands. Further, all the ADMET parameters (aqueous solubility, Blood brain barrier, intestinal absorption, CYP2D6, and plasma protein binding) were selected. Then, the output of the running protocol was visualized to give the ADMET chart.

### S.3.6 Toxicity studies

The toxicity parameters of the synthesized compounds were calculated using Discovery studio 4.0. Sorafenib was used as a reference molecule. At first, the CHARMM force field was applied then the compounds were prepared and minimized according to the preparation of small molecule protocol.

- **Preparation of the tested compounds:**

In this protocol, the general-purpose panel was utilized with the activation of the Prepare ligand option. The change ionization was switched on the true option using the Rule based as an ionization method. In Rule based task, we used the carboxylate as an acid ionization. Additionally, the primary, secondary, and tertiary amines were selected as Base ionization. The ionization enumeration option was switched on the one protomer. Under the filter smart option, we selected all options. The false option was selected for tasks Generate tautomers, generate isomers, Fix bad valencies, and parallel processing. The generate coordinates task was switched on the 3D option. Finally, the duplicate structure task was activated on the remove option.

- **Running of Toxicity protocol**

In this protocol, the small molecules panel was utilized with the activation of the toxicity prediction (extensible) option. Then, we selected the prepared compounds as the input ligands. Further, the different toxicity models were selected from the model panel. The similarity search task was activated to be true. The detailed report task was switched on as a PDF file. Then, the output of the running protocol was visualized to give the toxicity PDF report.

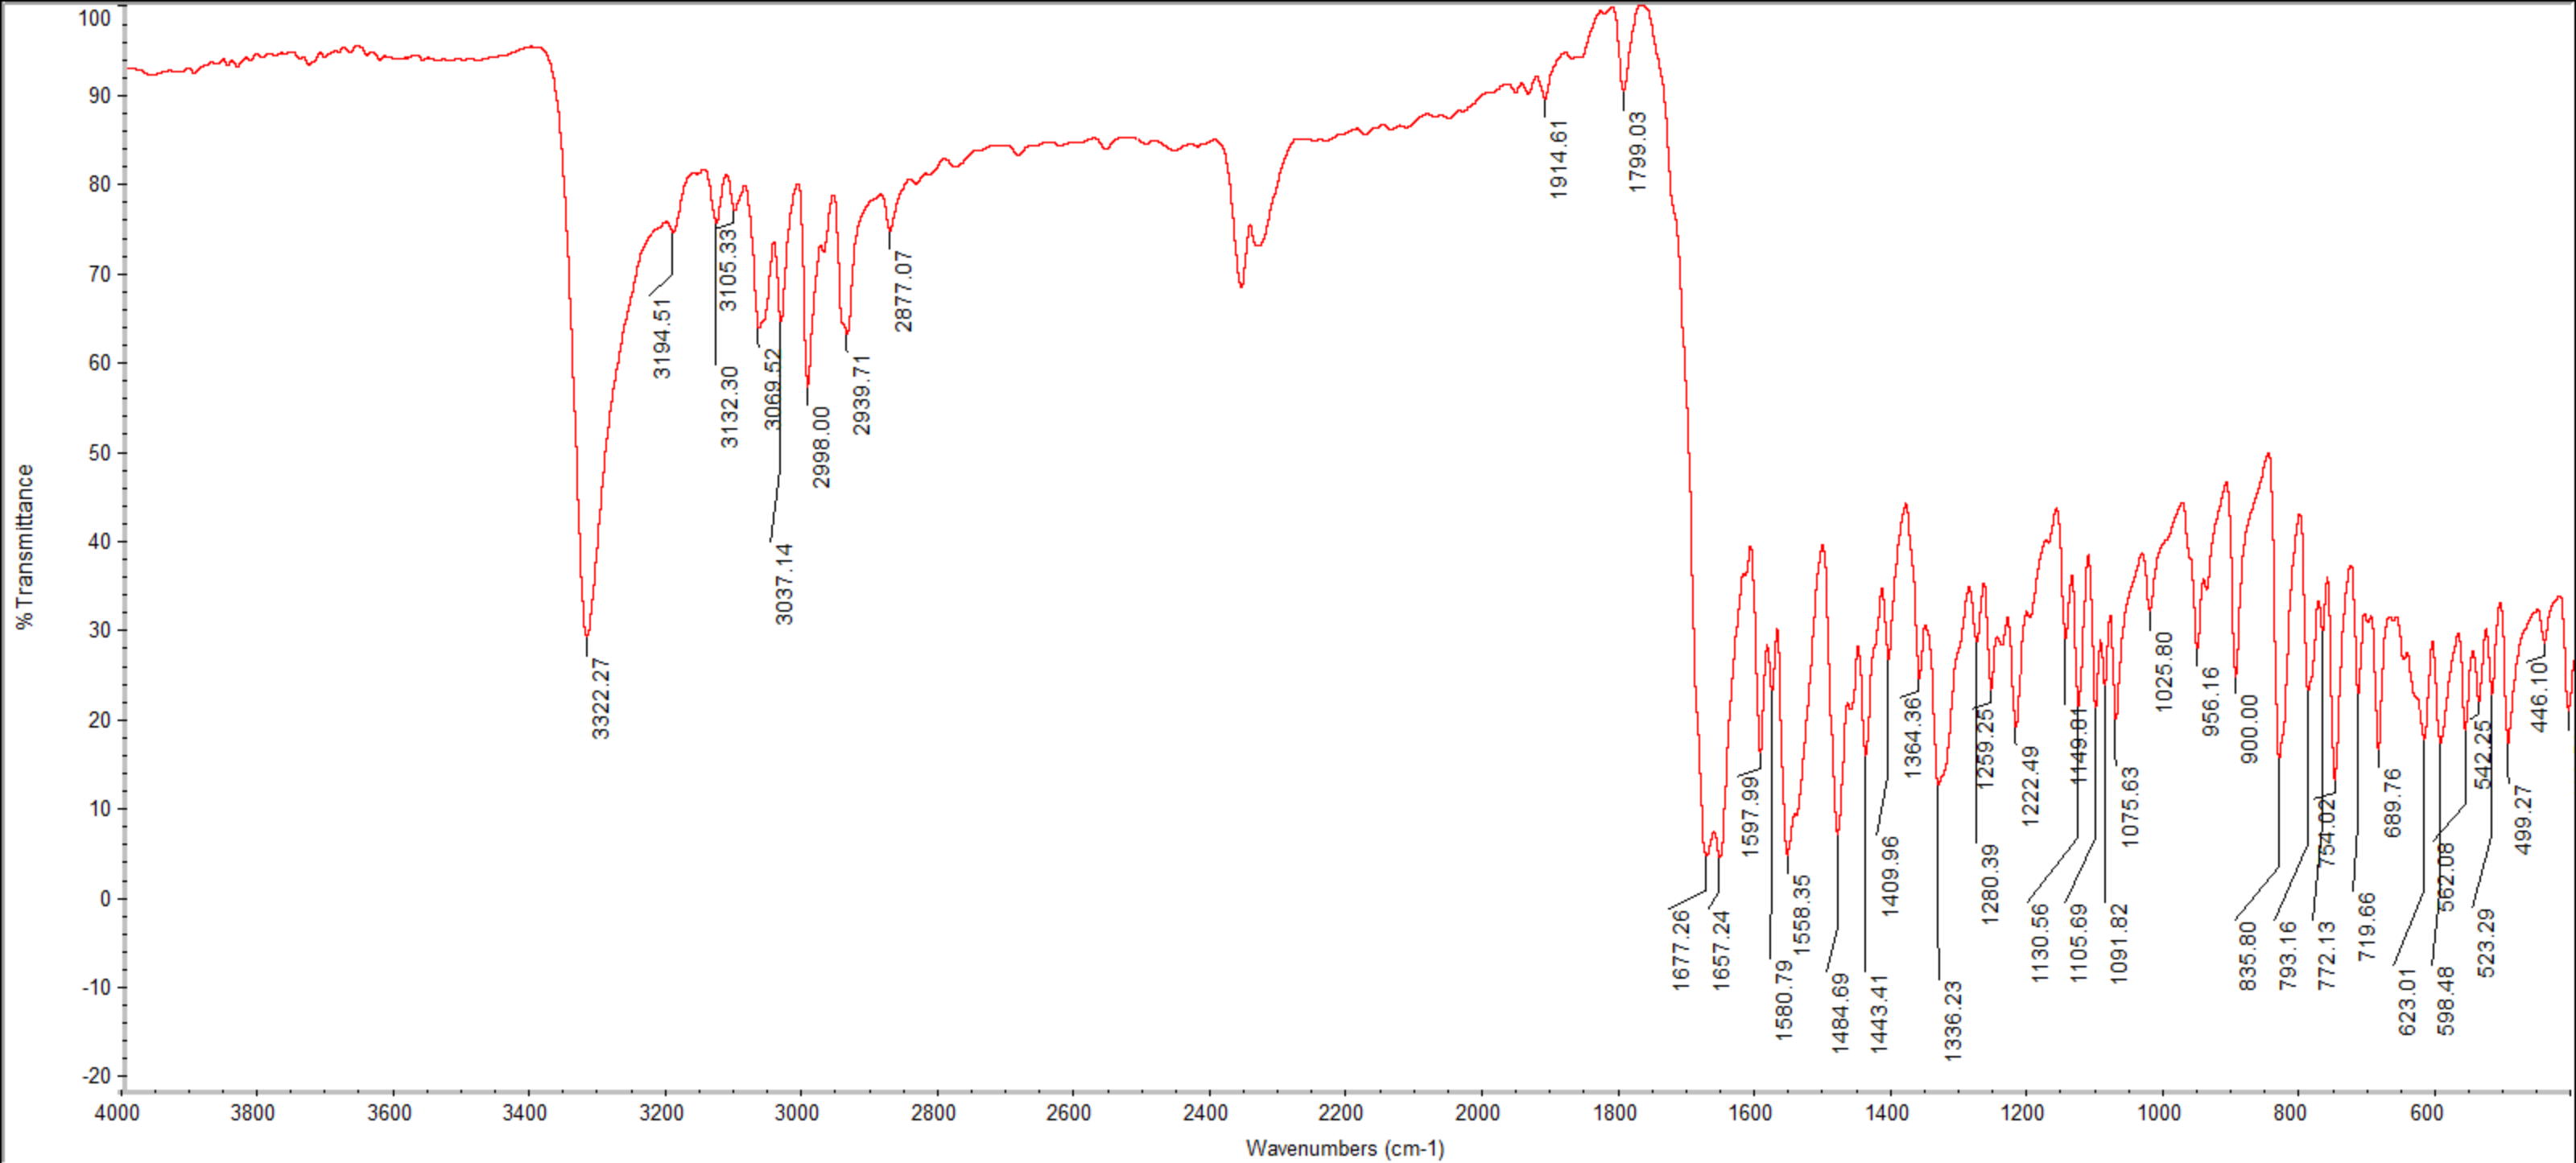

# **<sup>1</sup>H NMR of 7a**

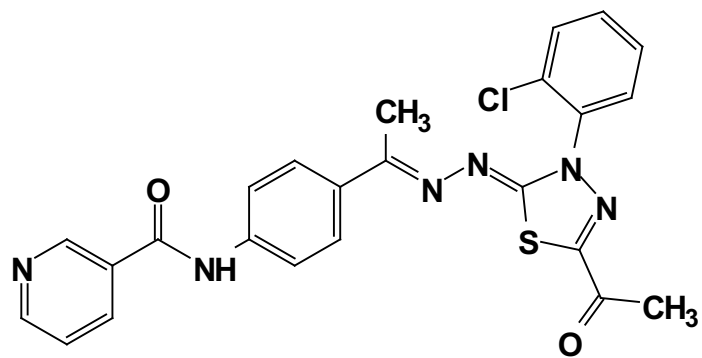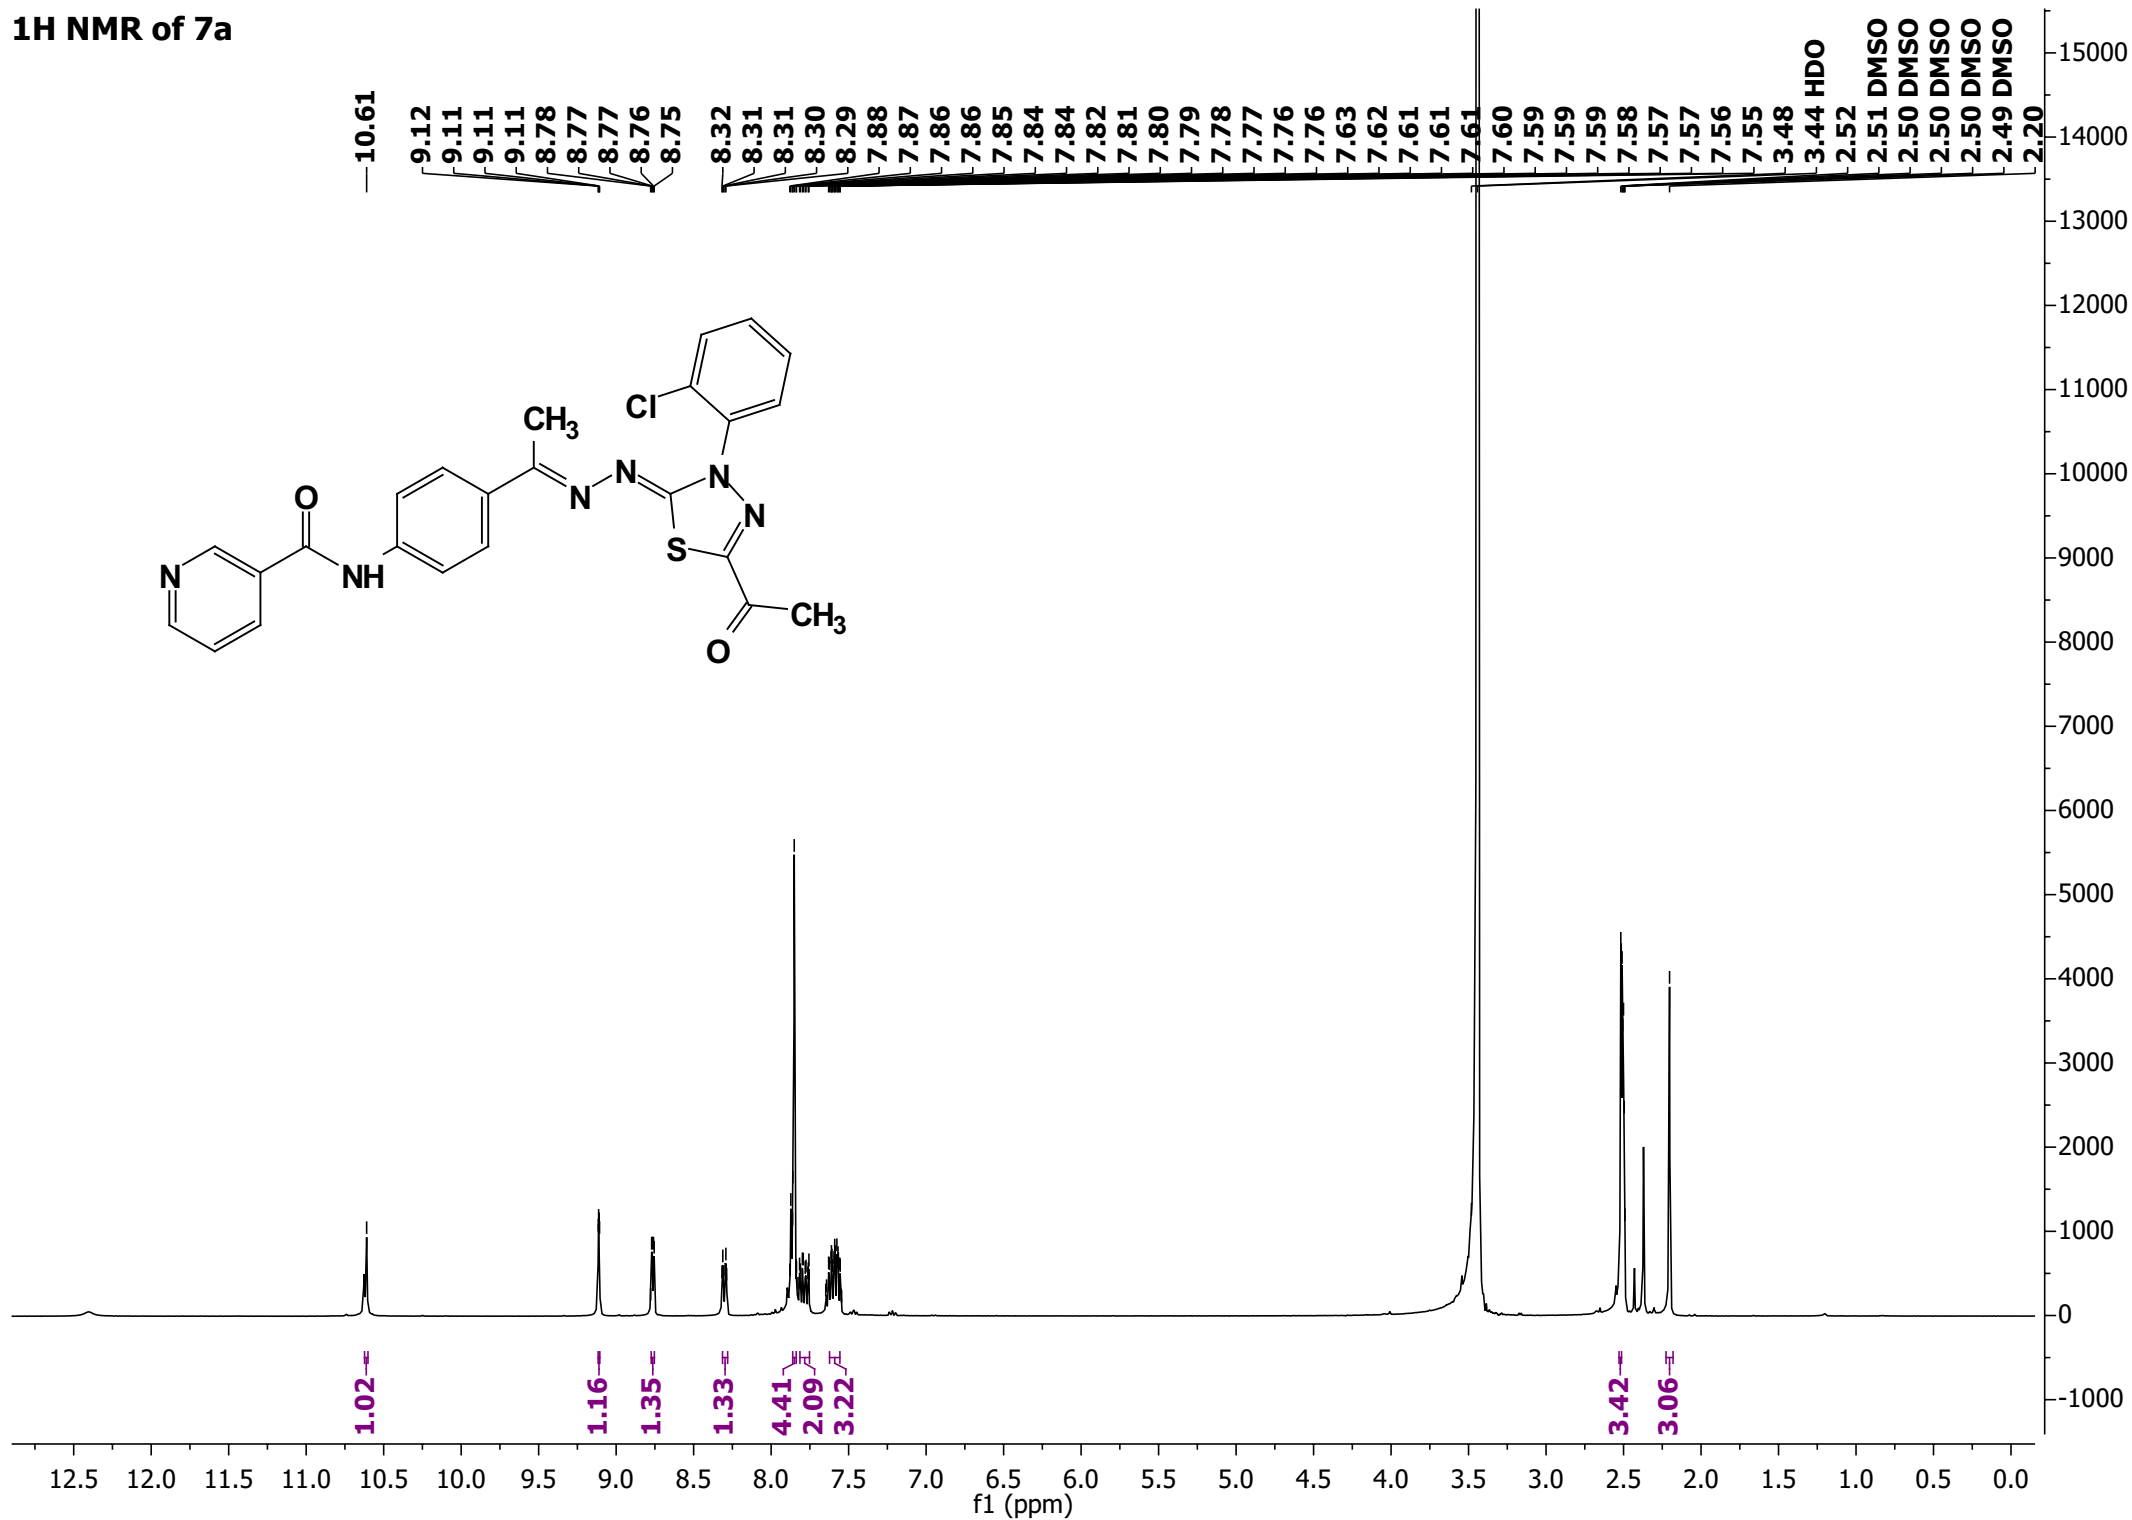

# **<sup>13</sup>C NMR of 7a**

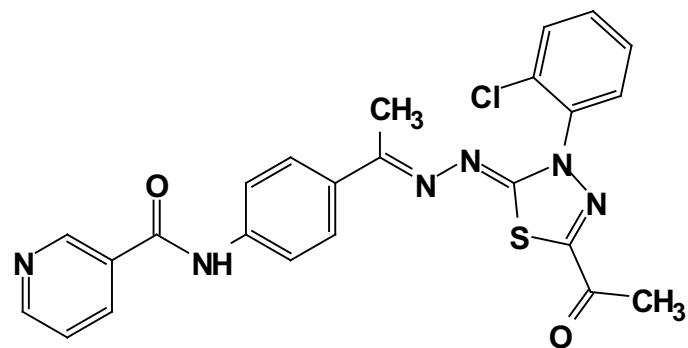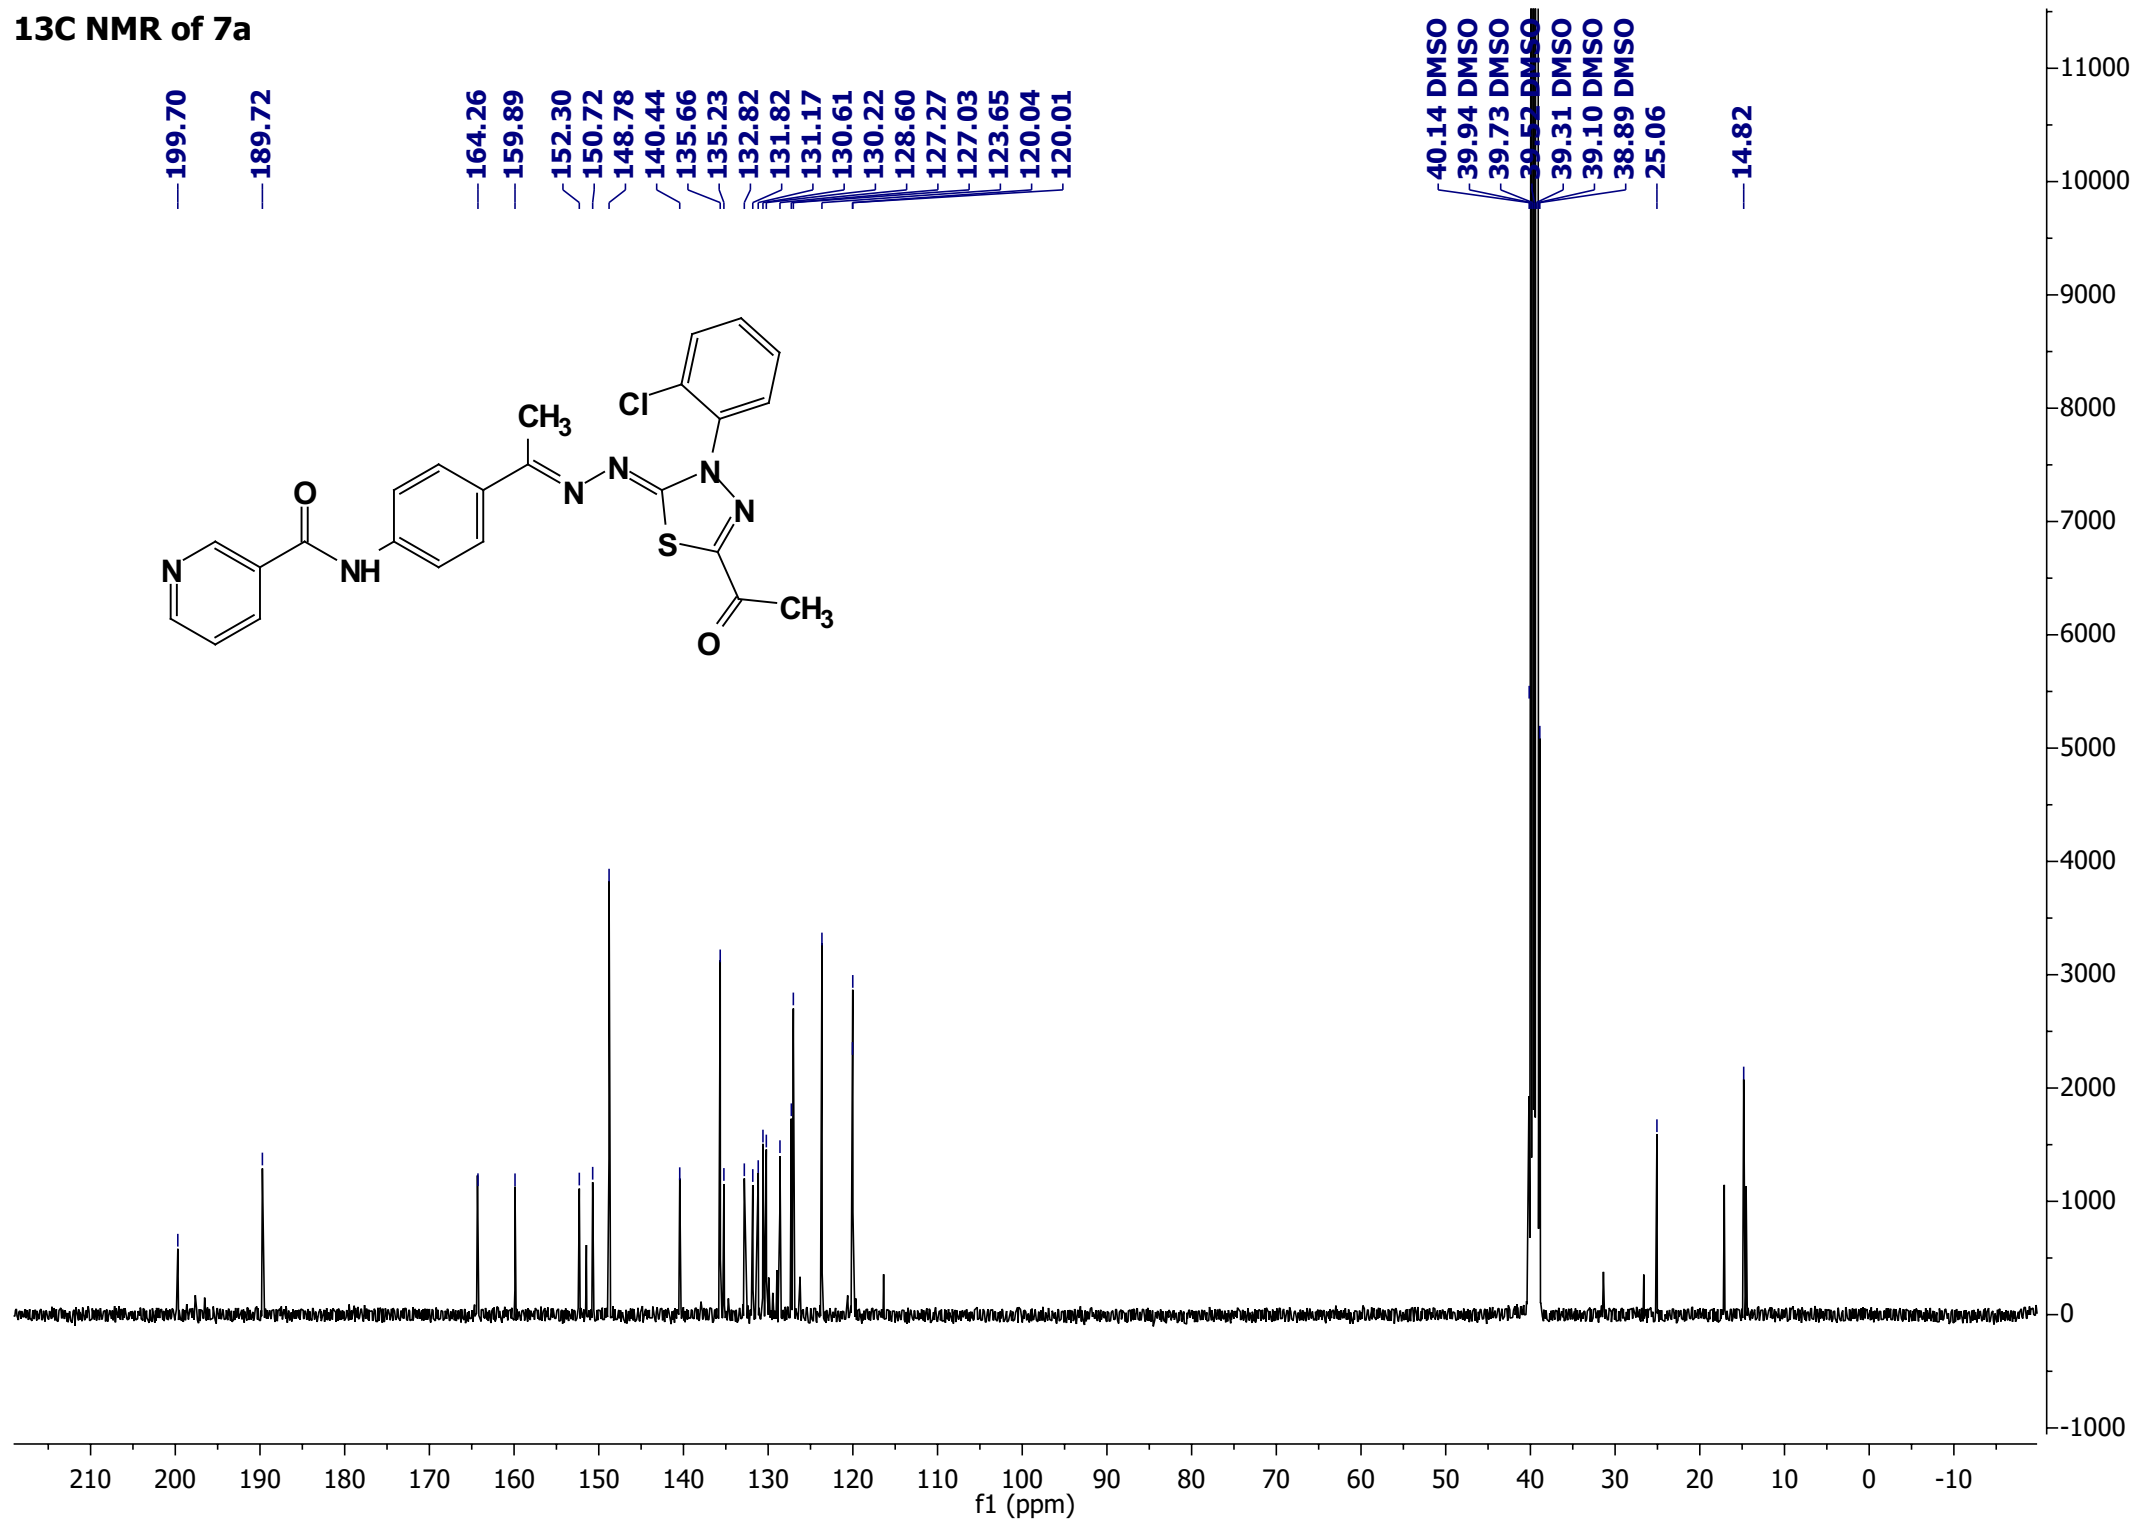



## Mass spec. of compound 7a

wn5 #125 RT: 2.11 P: + NL: 2.61E2  
T: {0,0} + c EI Full ms [40.00-1000.00]

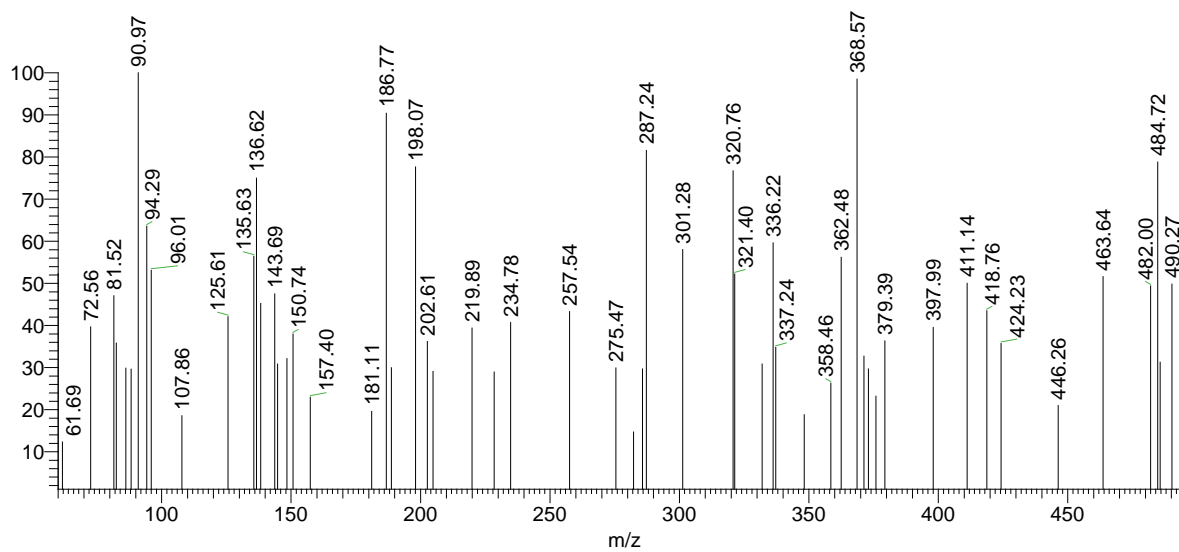

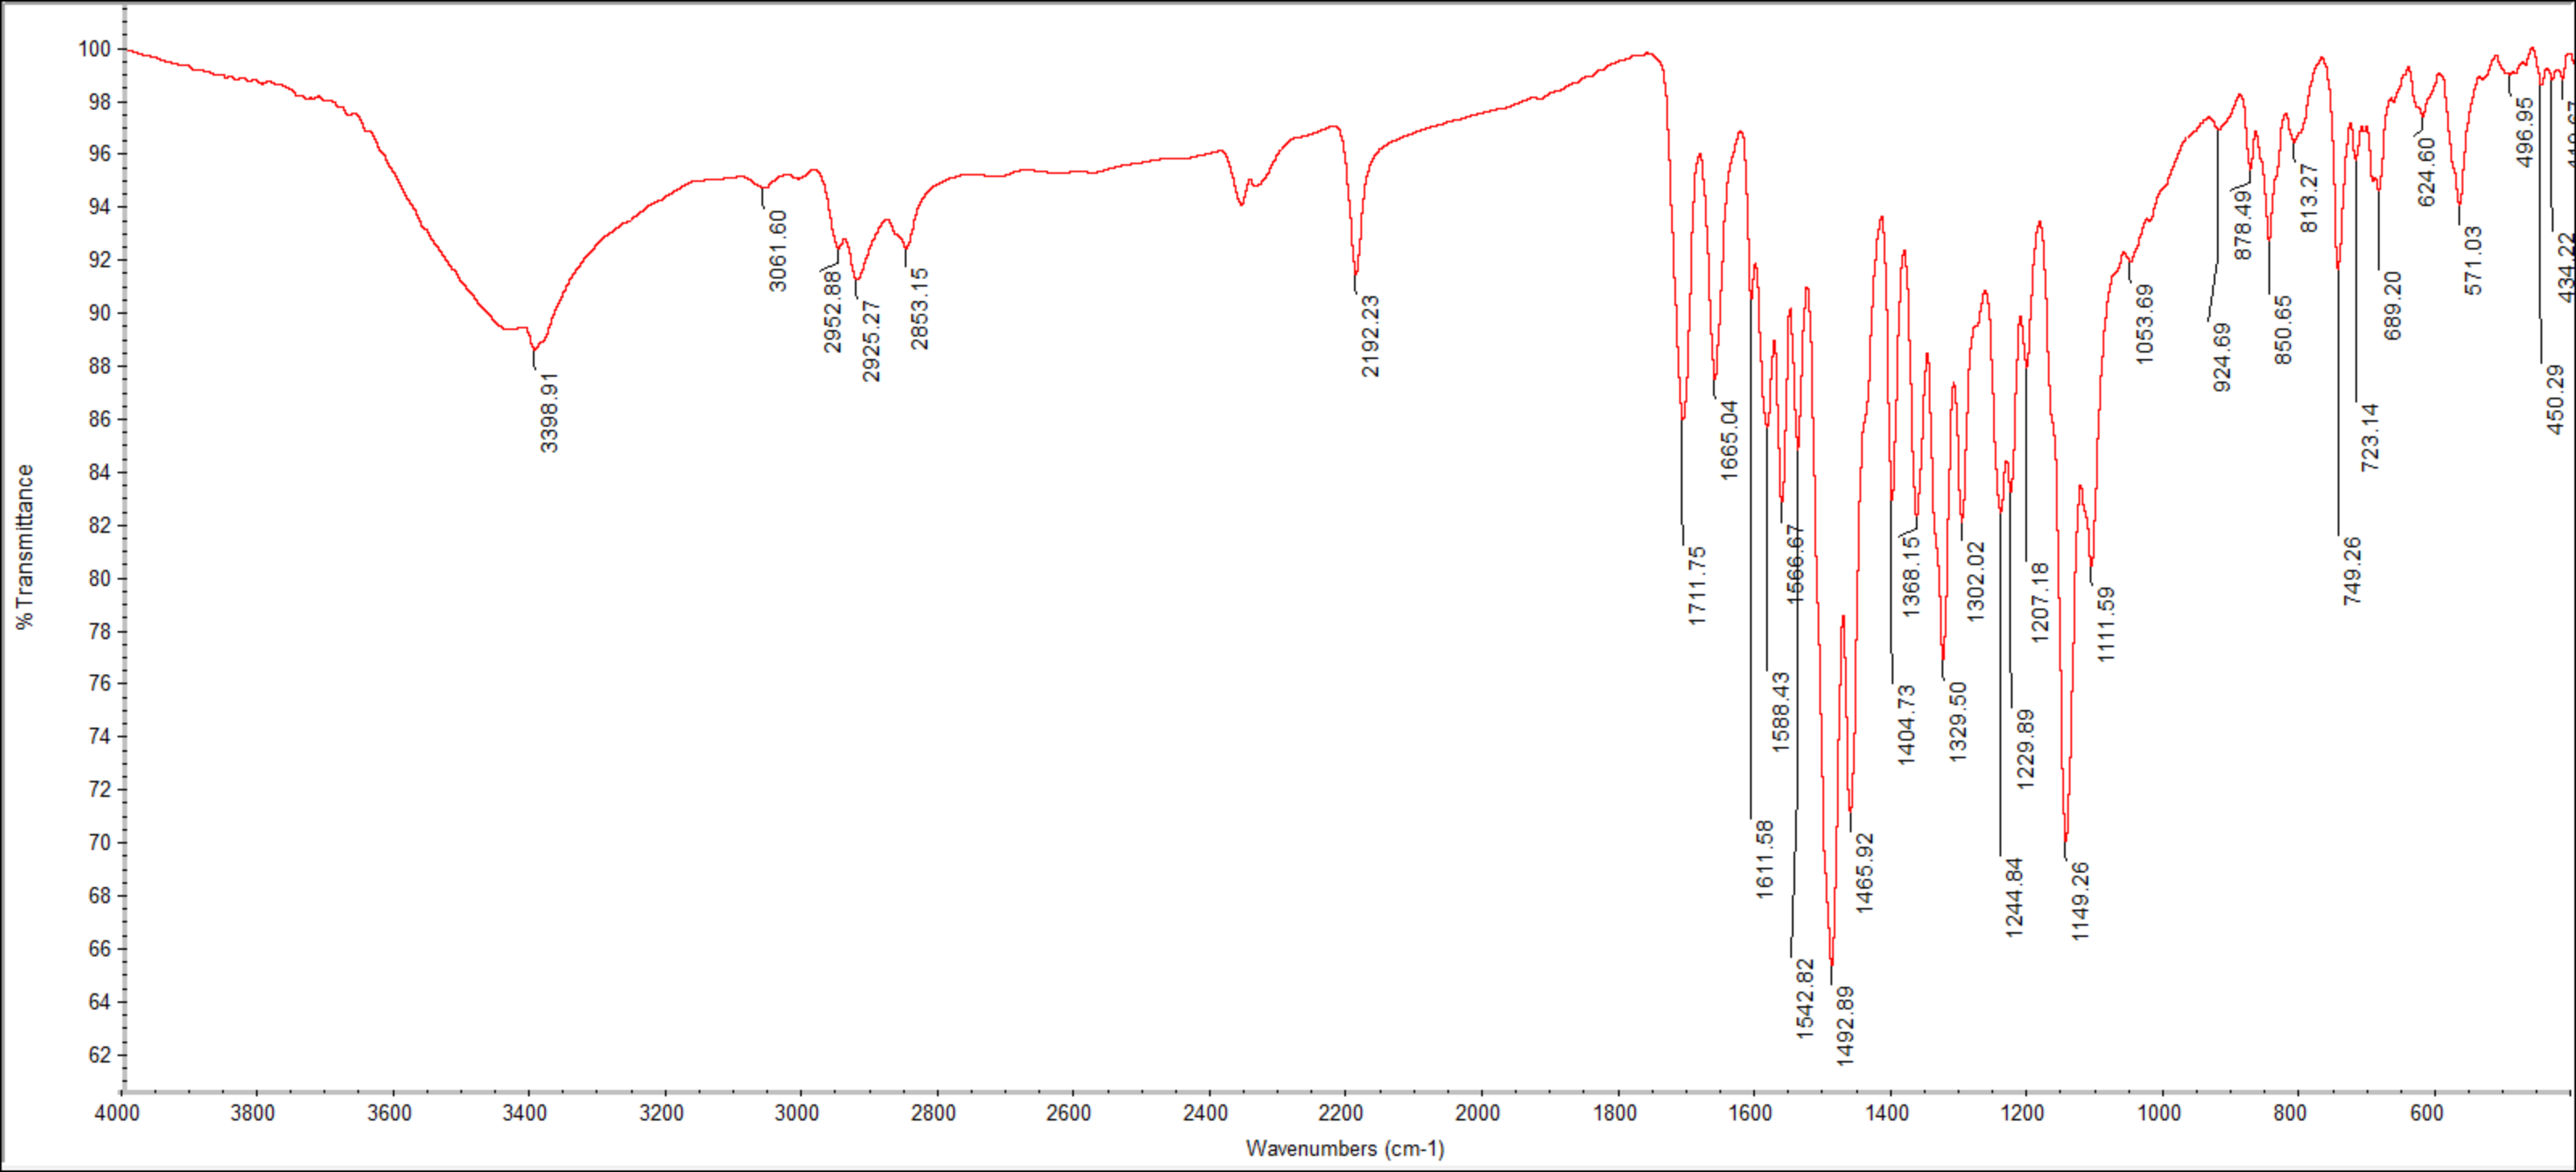

1H NMR of 7b

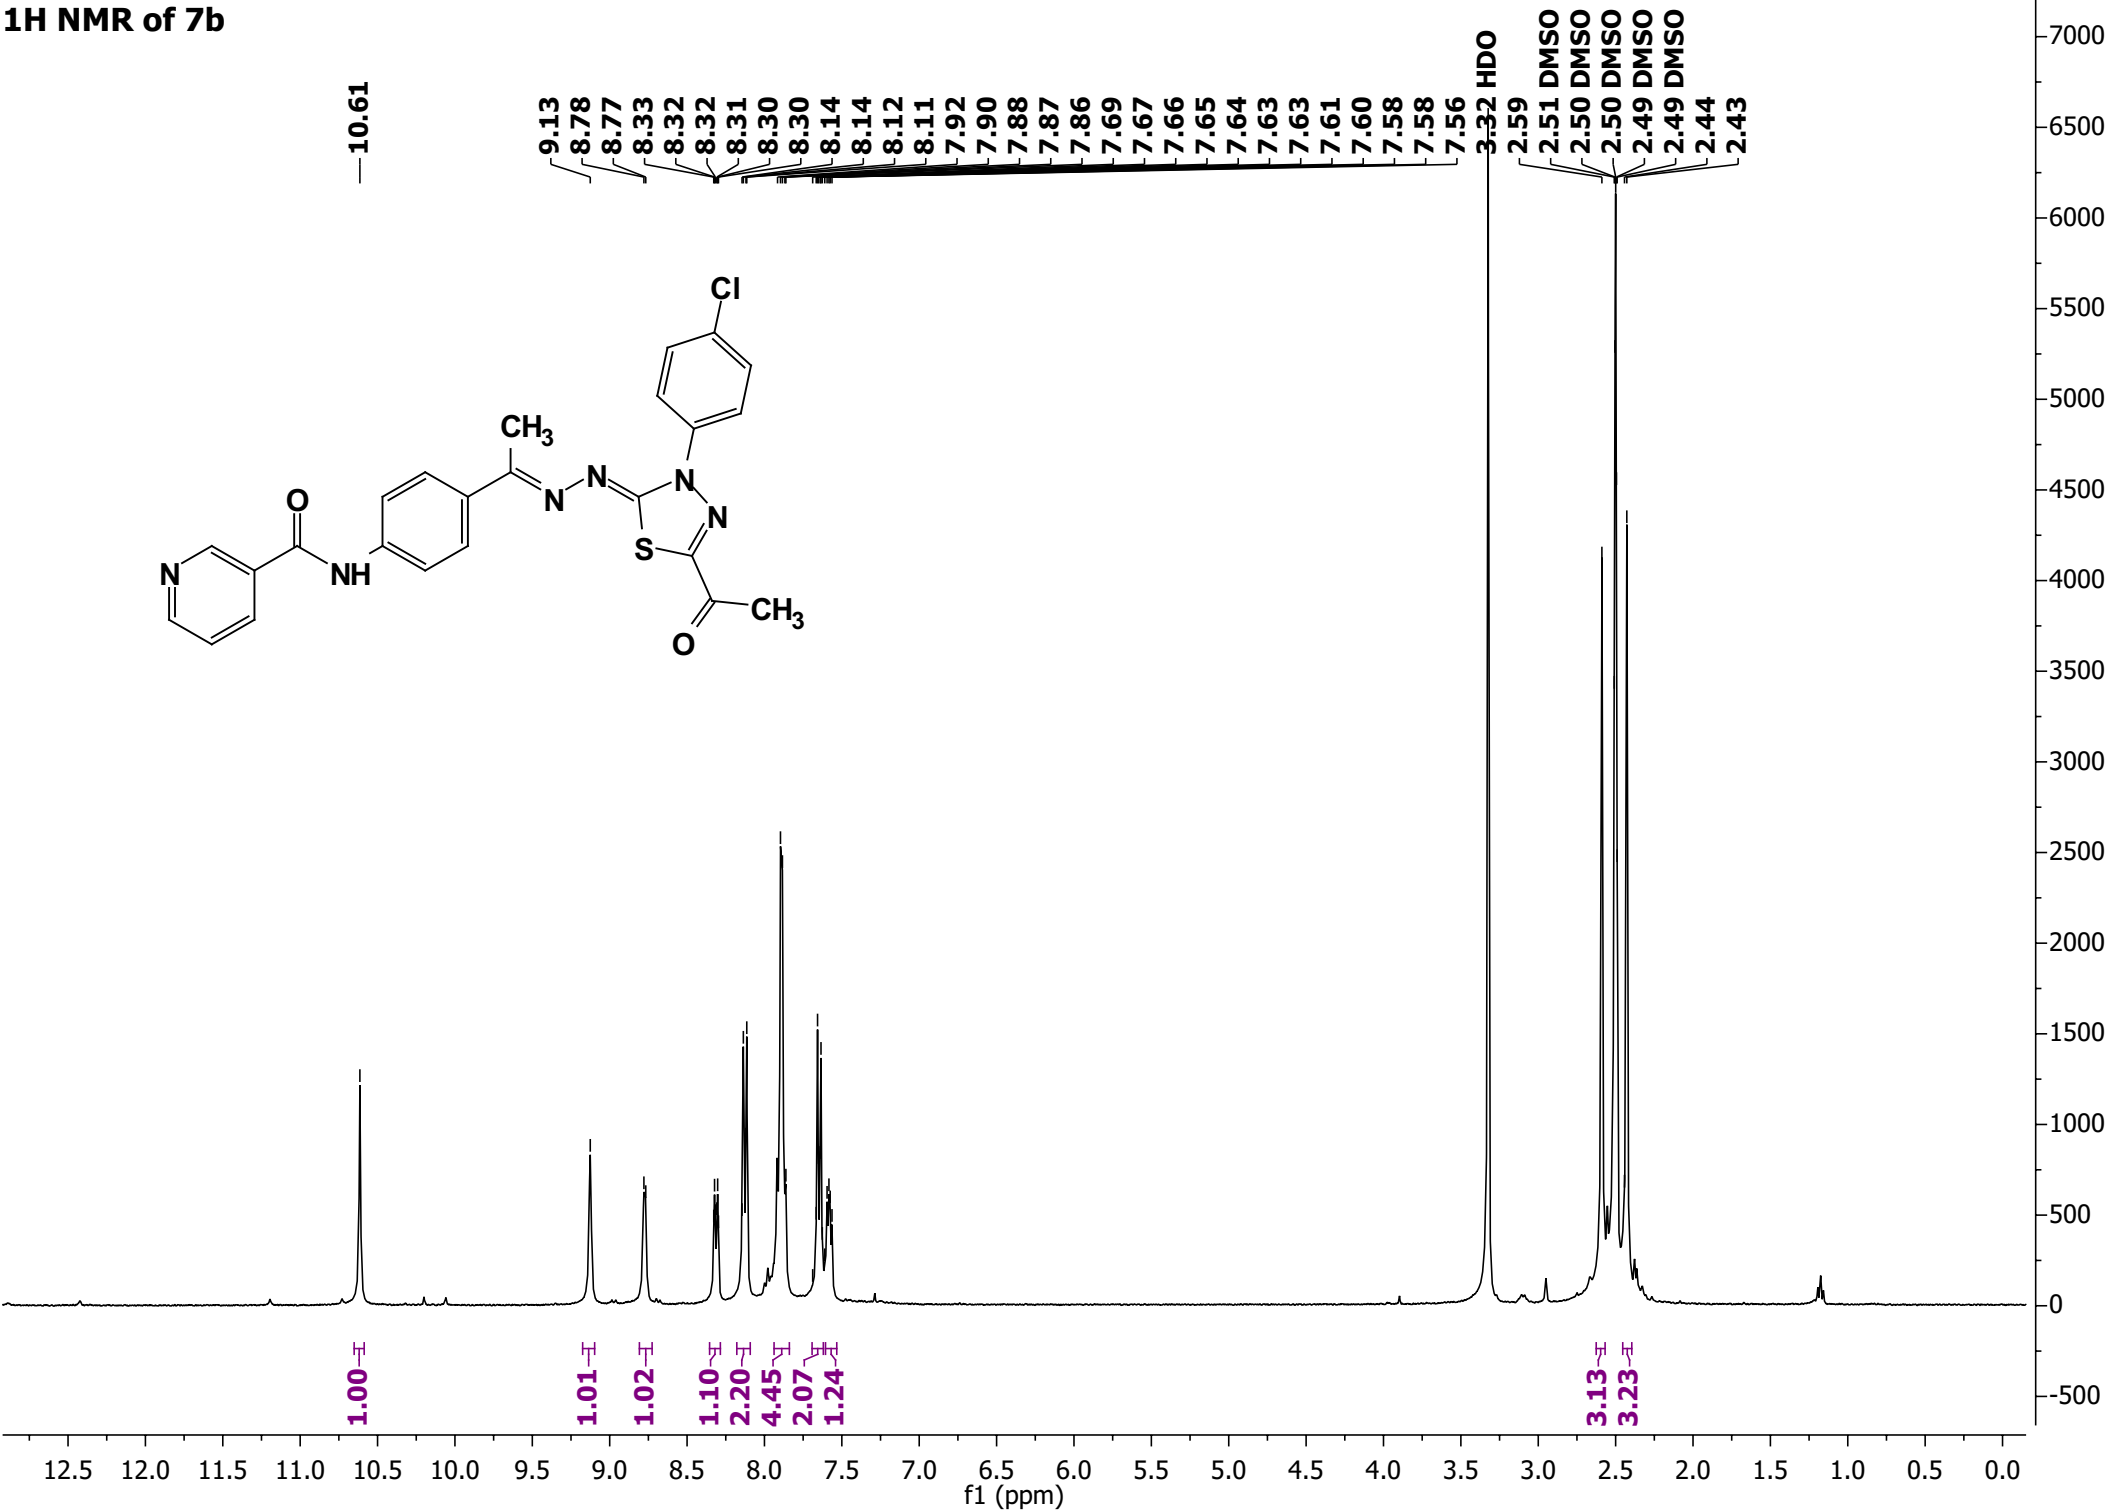

# **<sup>13</sup>C NMR of 7b**

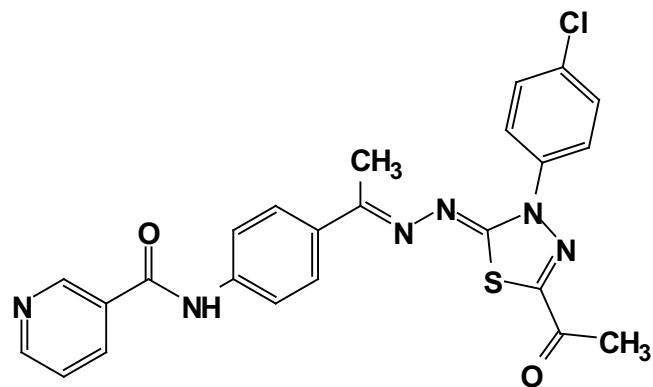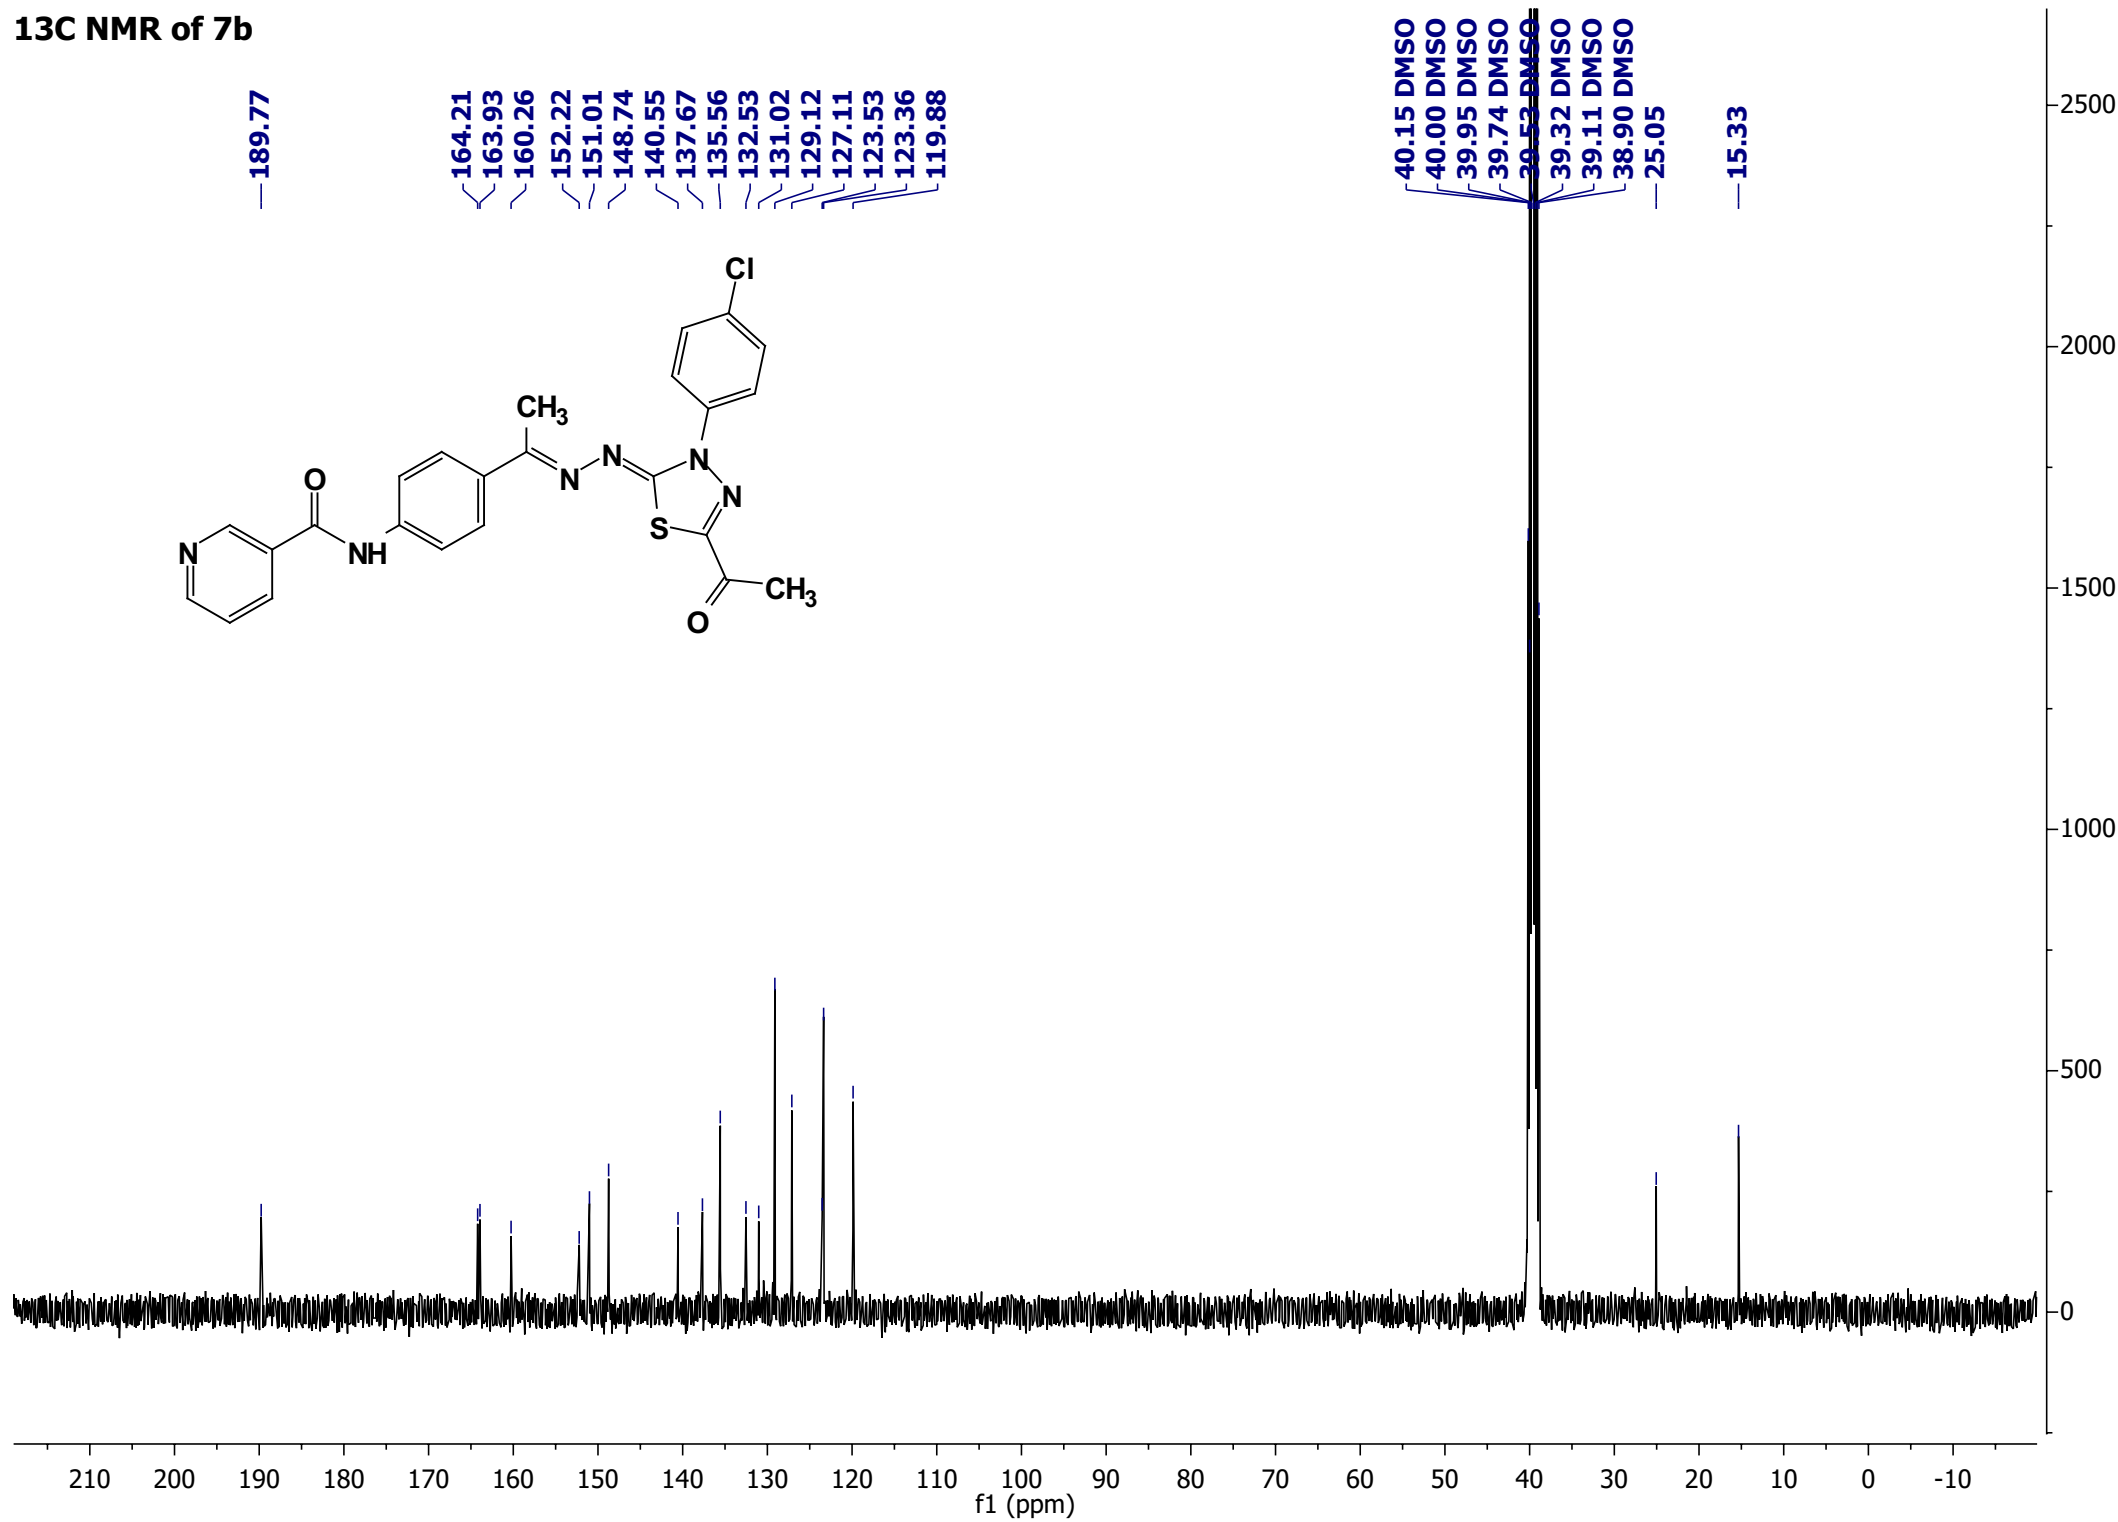

## SAMPLE INFORMATION

|                   |                            |                     |                                 |
|-------------------|----------------------------|---------------------|---------------------------------|
| Sample Name:      | WN-4                       | Acquired By:        | YARA                            |
| Sample Type:      | Unknown                    | Sample Set Name:    |                                 |
| Vial:             | 35                         | Acq. Method Set:    | Organic                         |
| Injection #:      | 1                          | Processing Method:  | Default                         |
| Injection Volume: | 4.00 ul                    | Channel Name:       | 336.0nm@2                       |
| Run Time:         | 20.0 Minutes               | Proc. Chnl. Descr.: | W2996 FDA 336.0 nm(FDA 190.0 to |
|                   |                            |                     |                                 |
| Date Acquired:    | 22/05/2024 03:39:26 PM EET |                     |                                 |
| Date Processed:   | 23/05/2024 11:54:14 AM EET |                     |                                 |

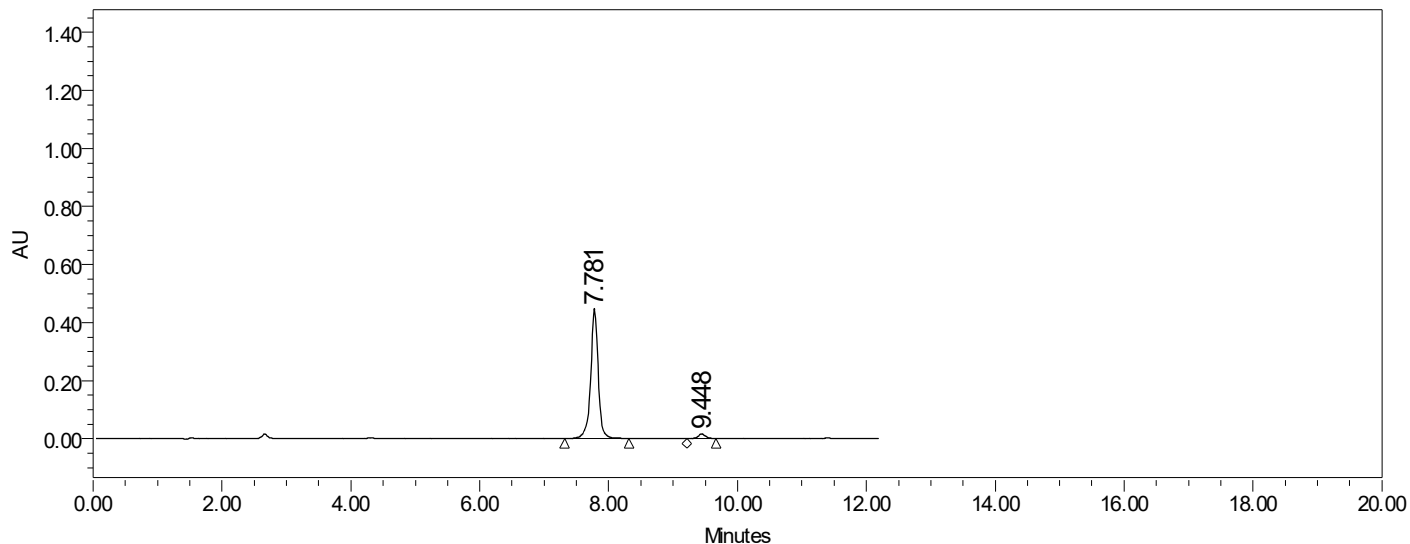

|   | RT    | Area    | % Area | Height |
|---|-------|---------|--------|--------|
| 1 | 7.781 | 3660422 | 96.71  | 445448 |
| 2 | 9.448 | 124459  | 3.29   | 15606  |

Reported by User: Dr Yara Nagah (YARA)

Report Method: Multi Sample Summary

Report Method ID: 50: 50171

Page: 28 of 47

Project Name: Analysis 2024\Organic impurities

Date Printed:

23/05/2024

01:18:46 Africa/Cairo

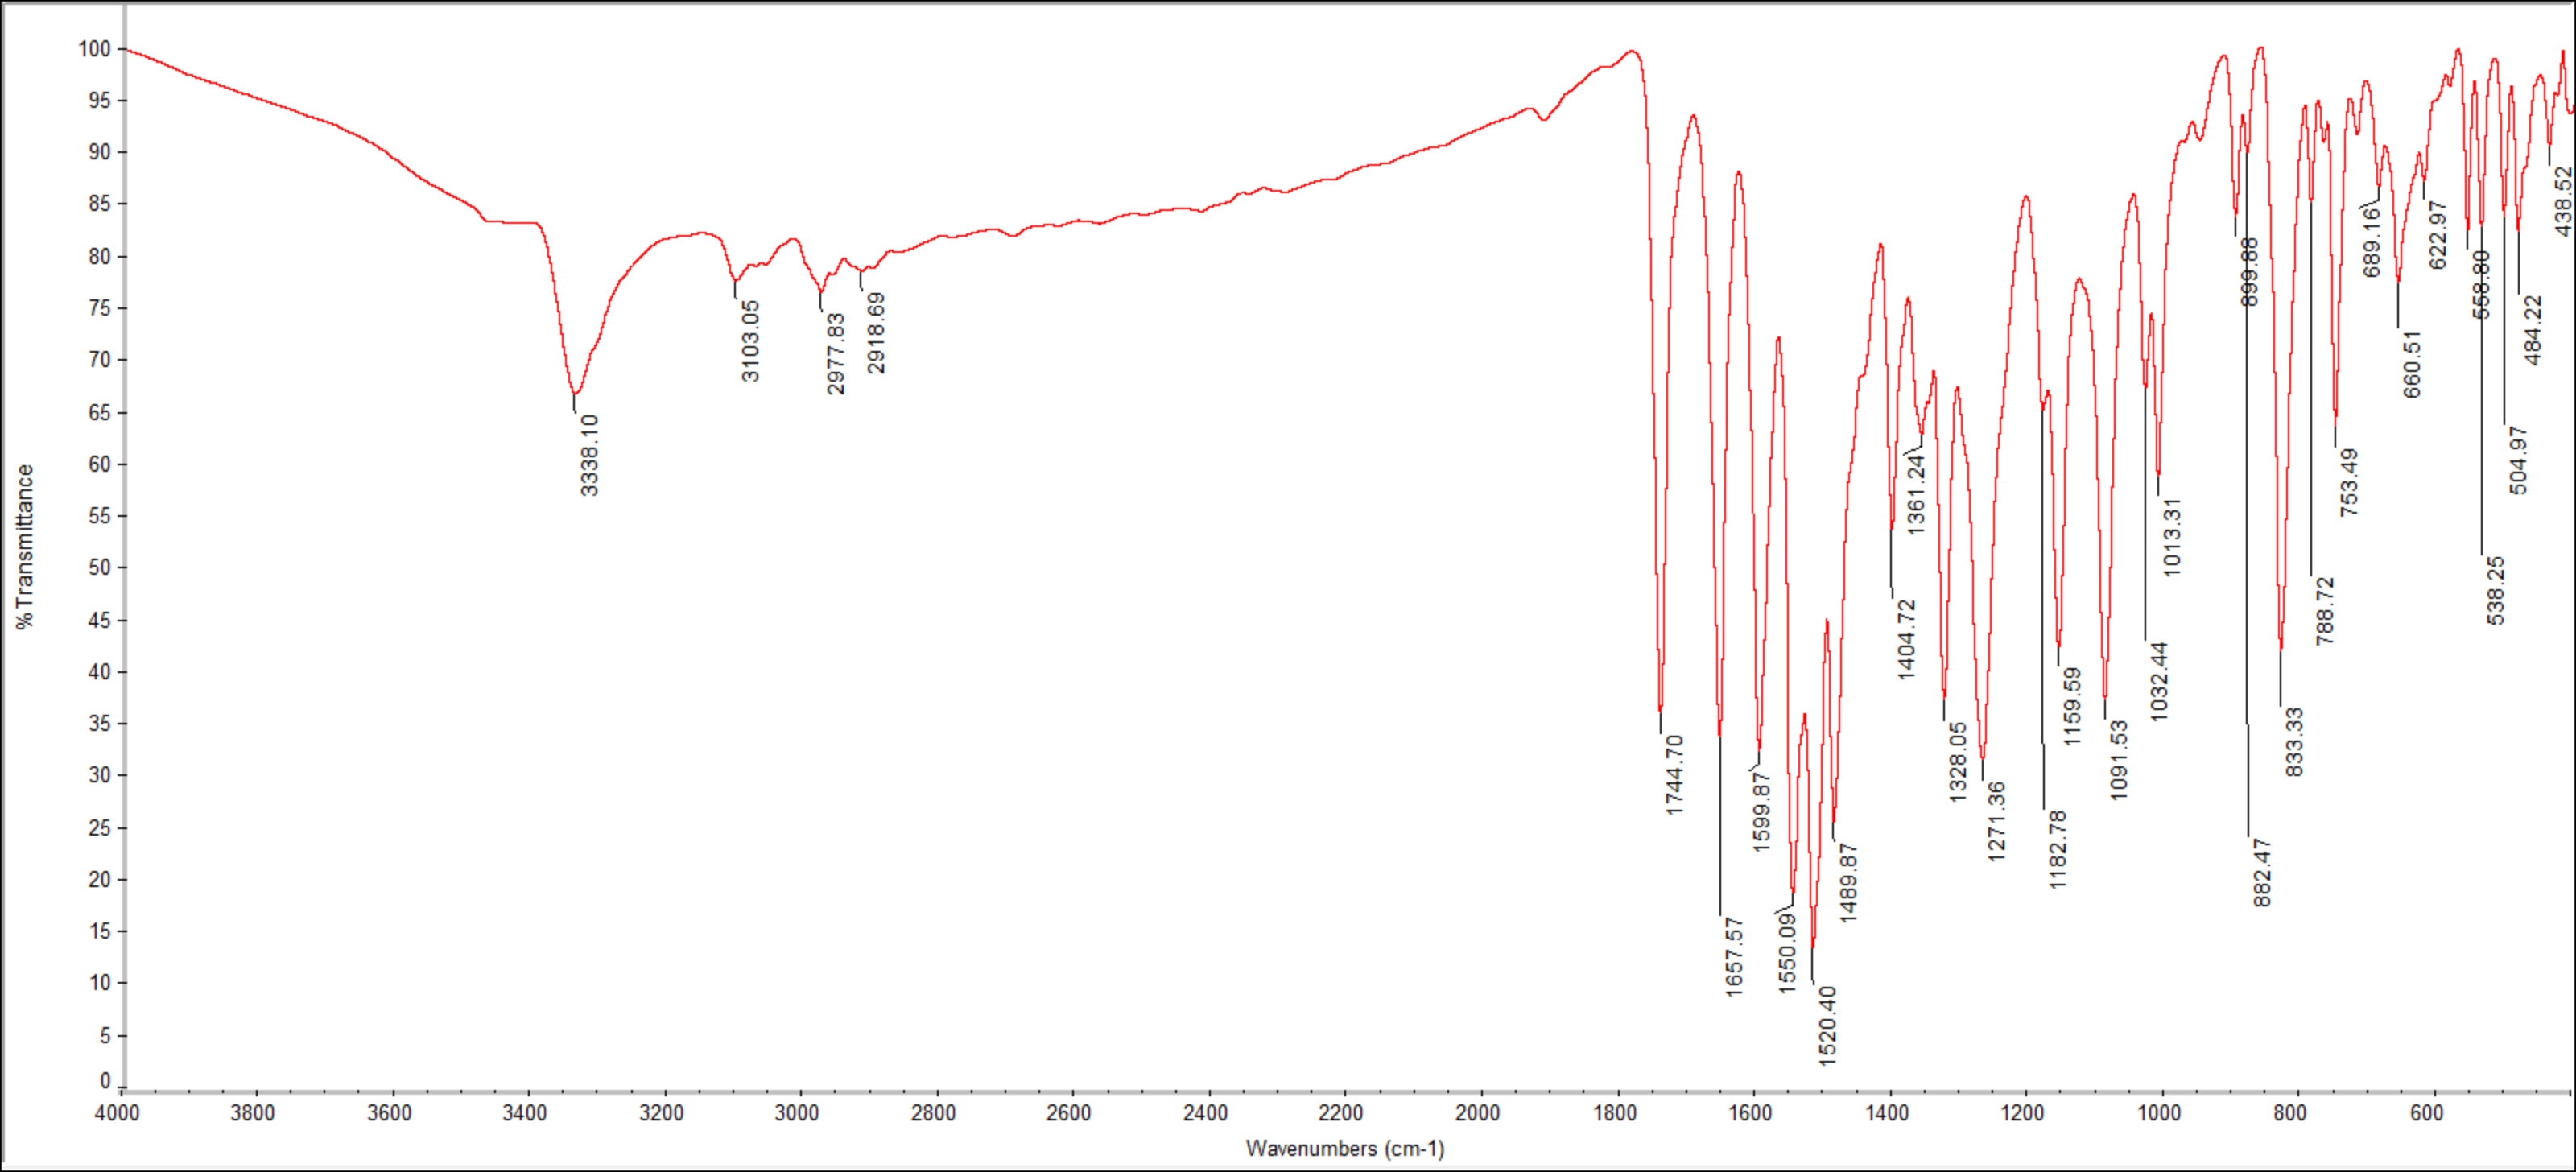

### **<sup>1</sup>H NMR of 7c**

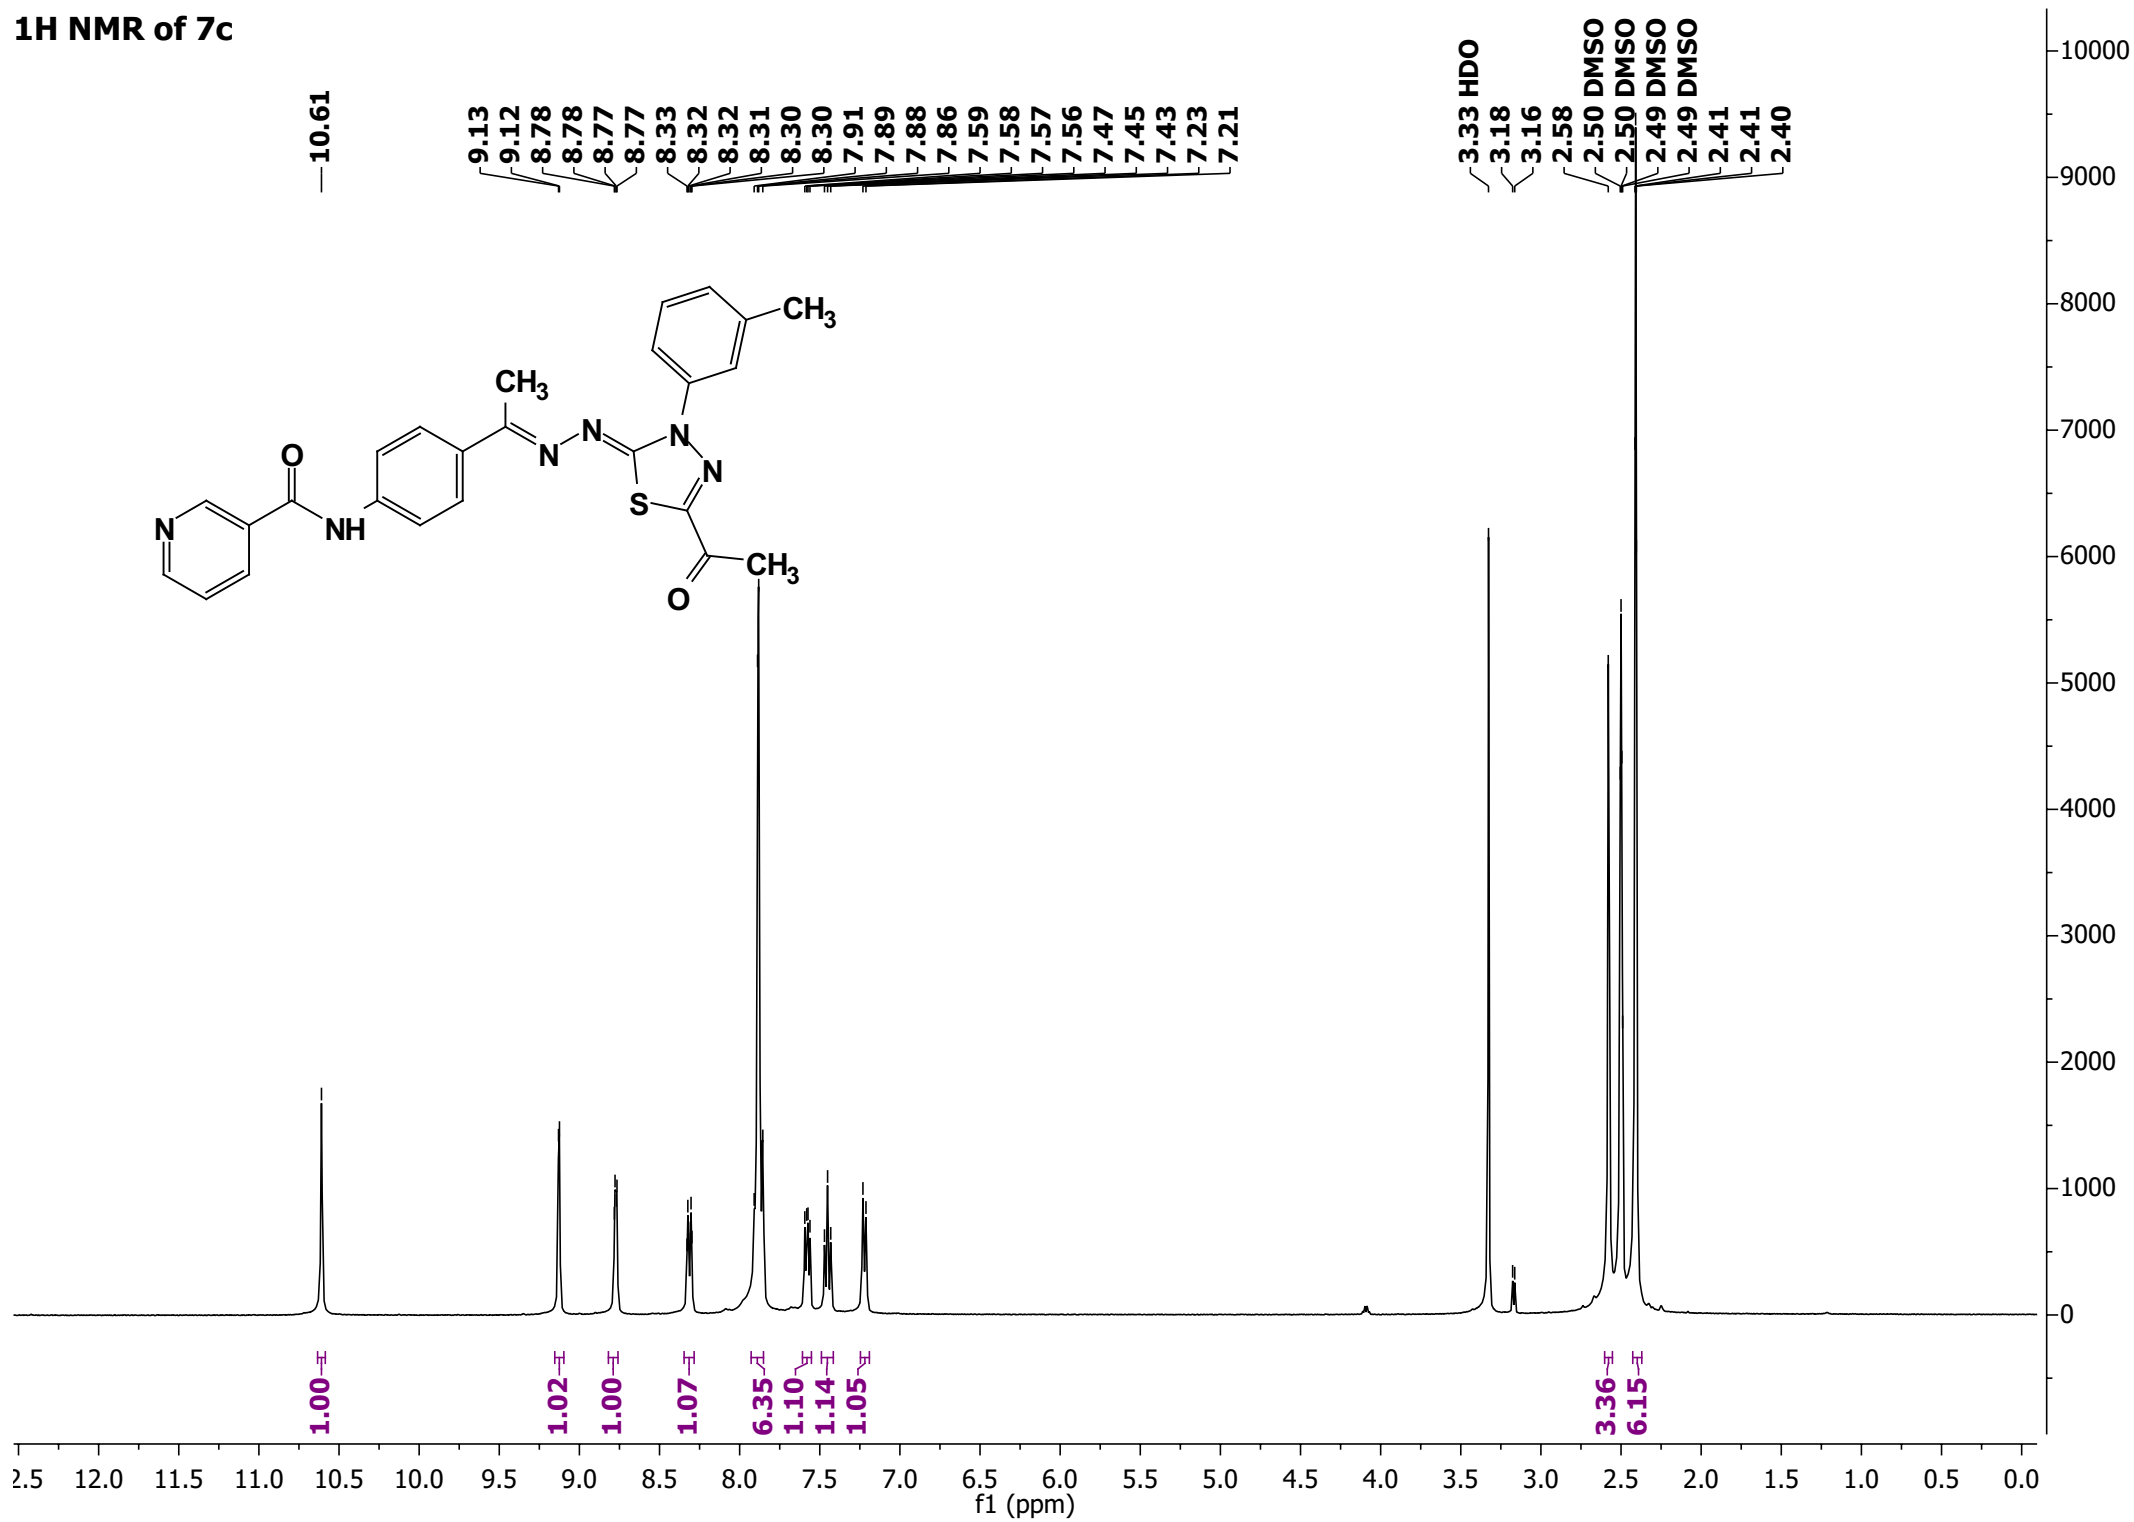

# **<sup>13</sup>C NMR of 7c**

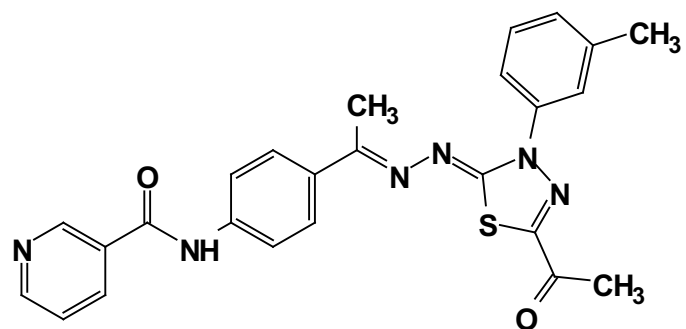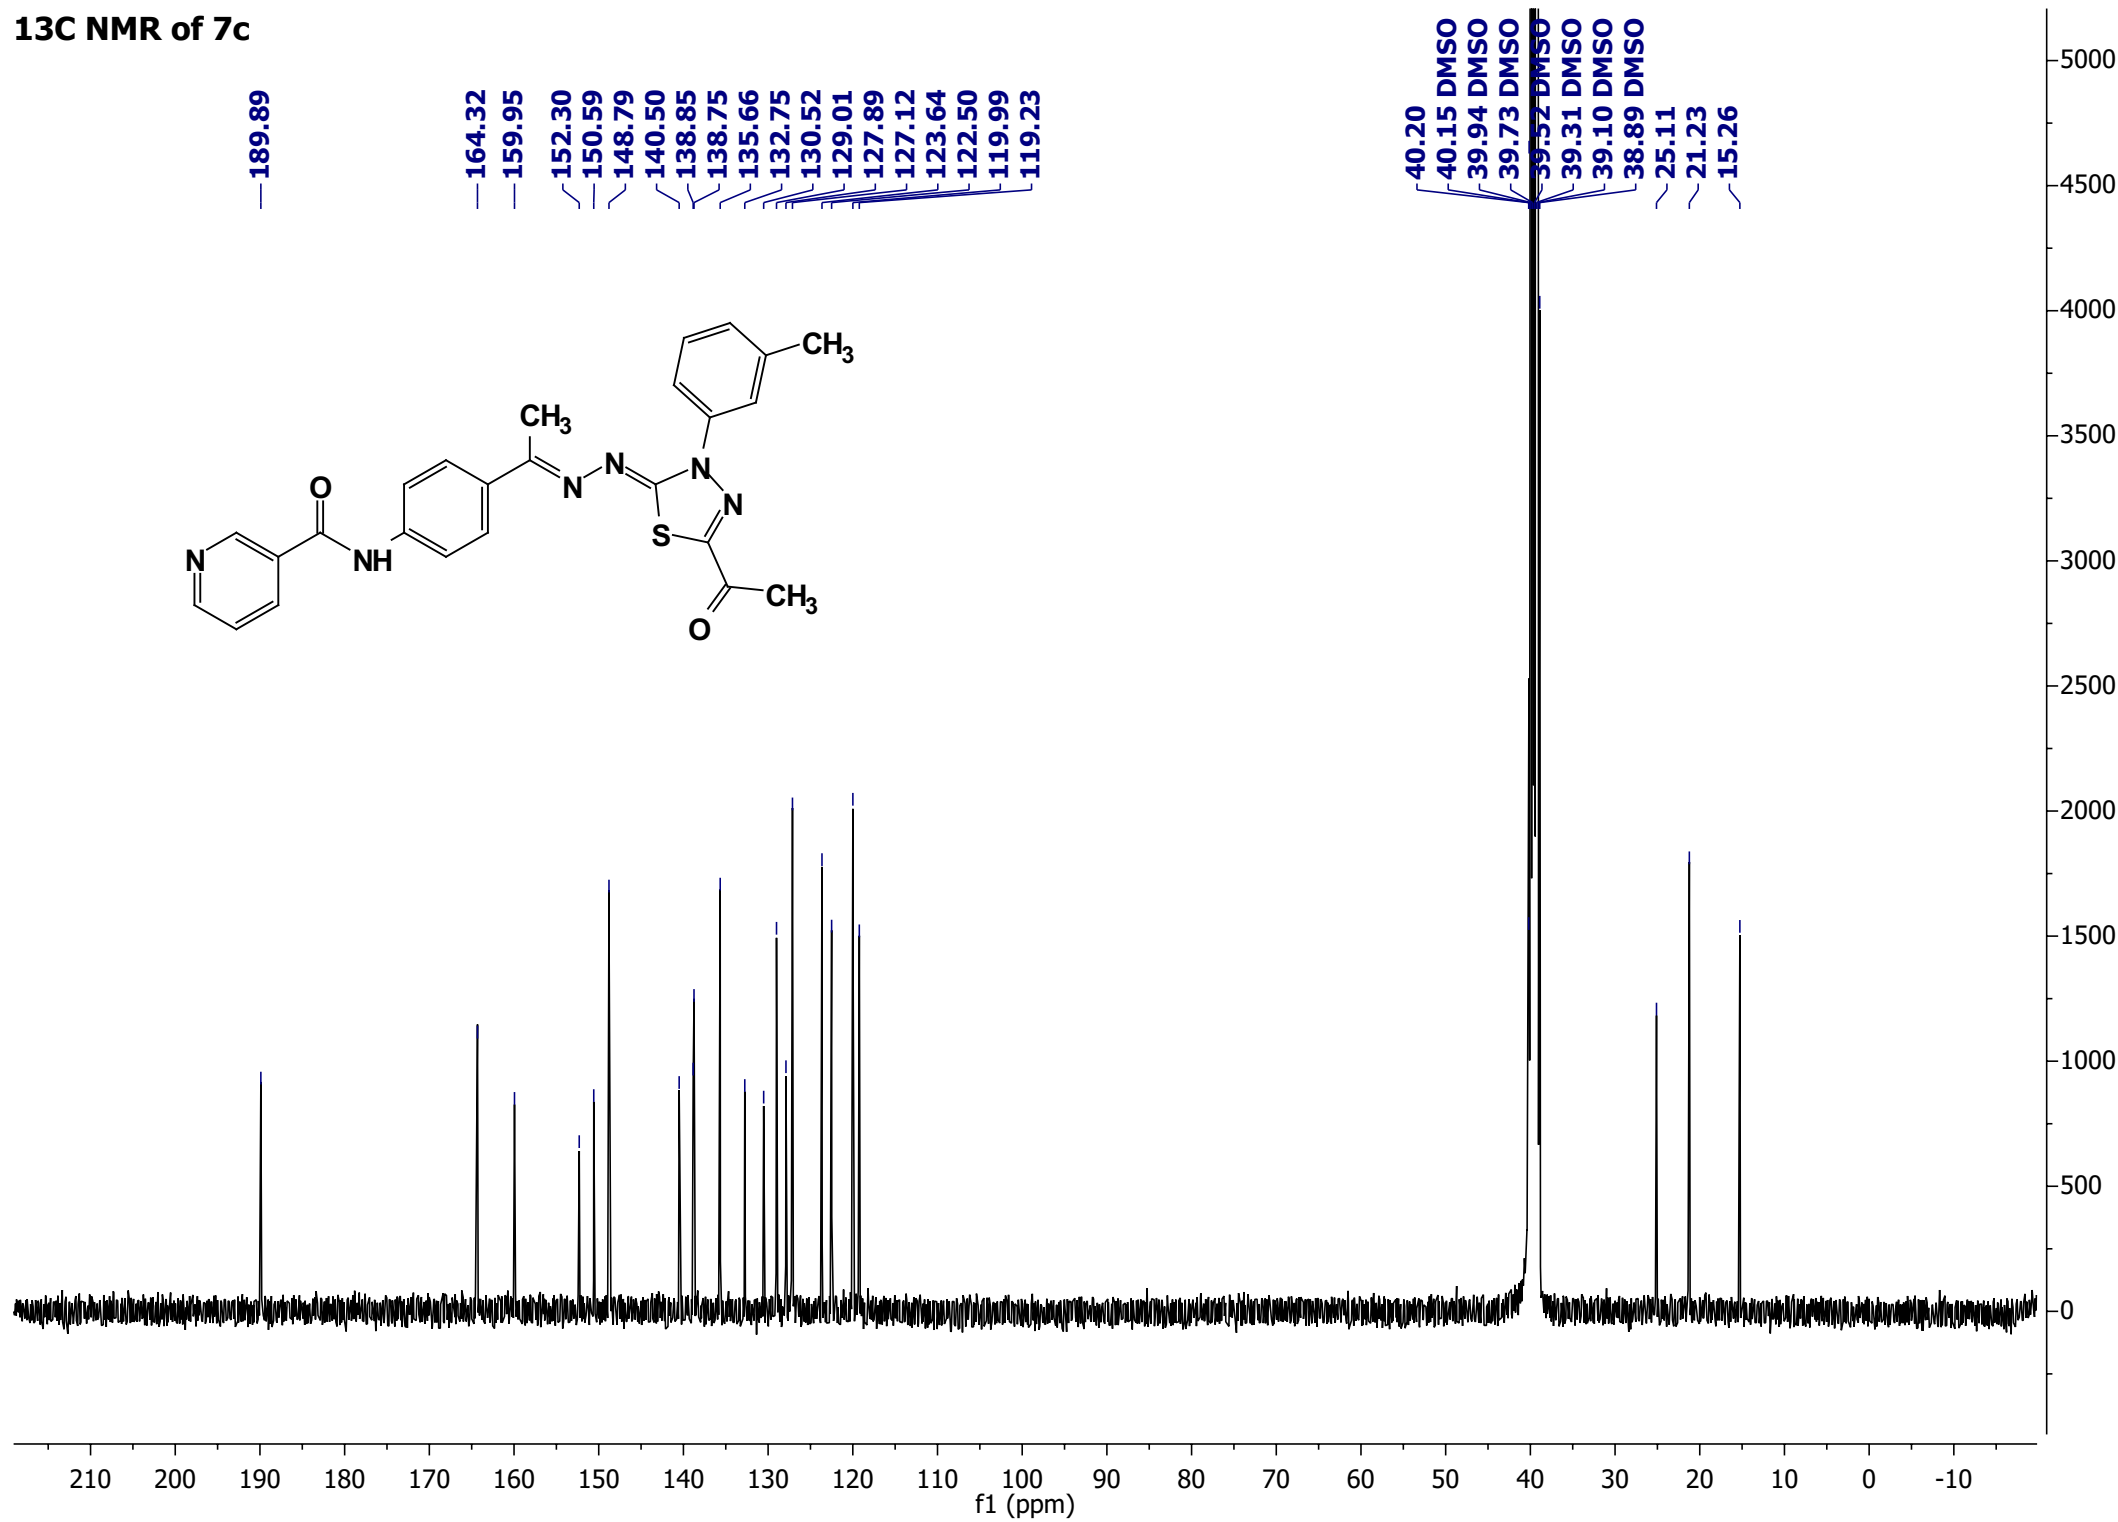



## SAMPLE INFORMATION

|                   |                            |                     |                                 |
|-------------------|----------------------------|---------------------|---------------------------------|
| Sample Name:      | WN-13                      | Acquired By:        | YARA                            |
| Sample Type:      | Unknown                    | Sample Set Name:    |                                 |
| Vial:             | 41                         | Acq. Method Set:    | Organic                         |
| Injection #:      | 1                          | Processing Method:  | Default                         |
| Injection Volume: | 4.00 ul                    | Channel Name:       | 334.0nm@1                       |
| Run Time:         | 20.0 Minutes               | Proc. Chnl. Descr.: | W2996 FDA 334.0 nm(FDA 190.0 to |
|                   |                            |                     |                                 |
| Date Acquired:    | 22/05/2024 05:51:59 PM EET |                     |                                 |
| Date Processed:   | 23/05/2024 11:52:02 AM EET |                     |                                 |

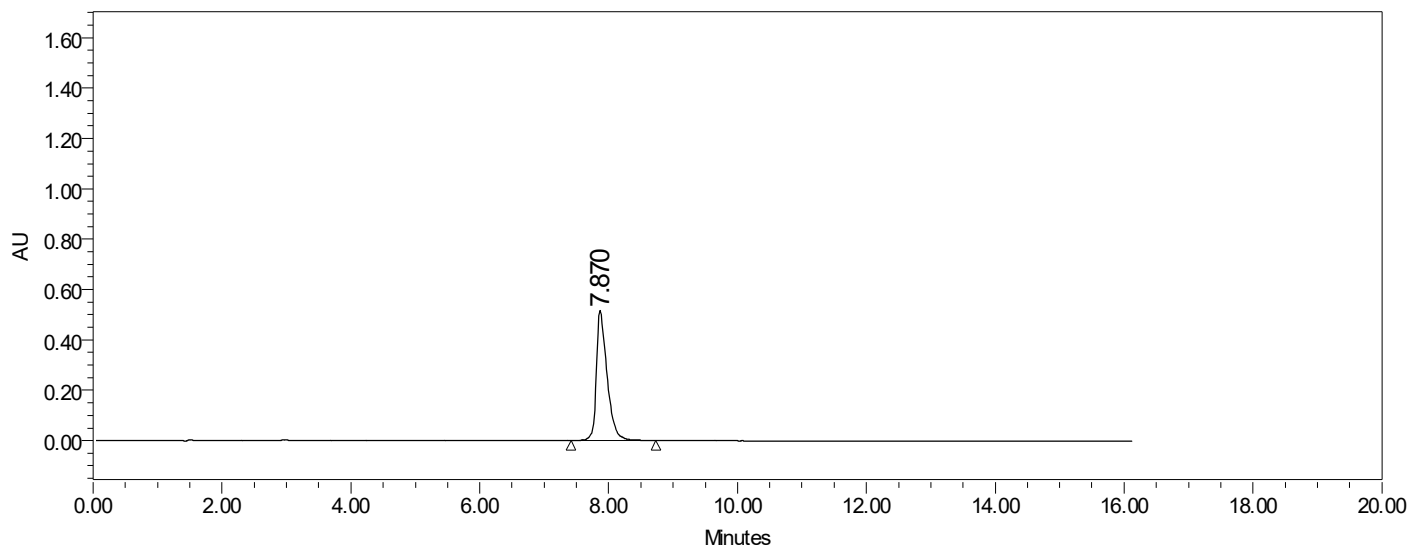

|   | RT    | Area    | % Area | Height |
|---|-------|---------|--------|--------|
| 1 | 7.870 | 5986203 | 100.00 | 516604 |

# Mass spec. of compound 7c

wn13 #134 RT: 2.26 P: + SB: 6 2.18 , 2.11-2.18 NL: 1.51E3  
T: {0,0} + c EI Full ms [40.00-1000.00]

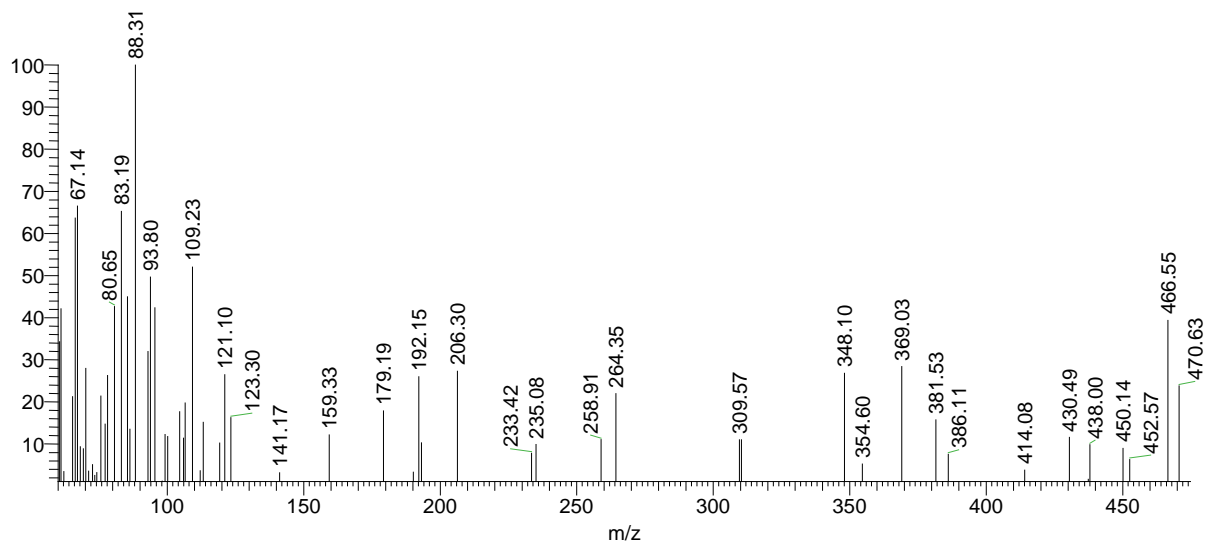

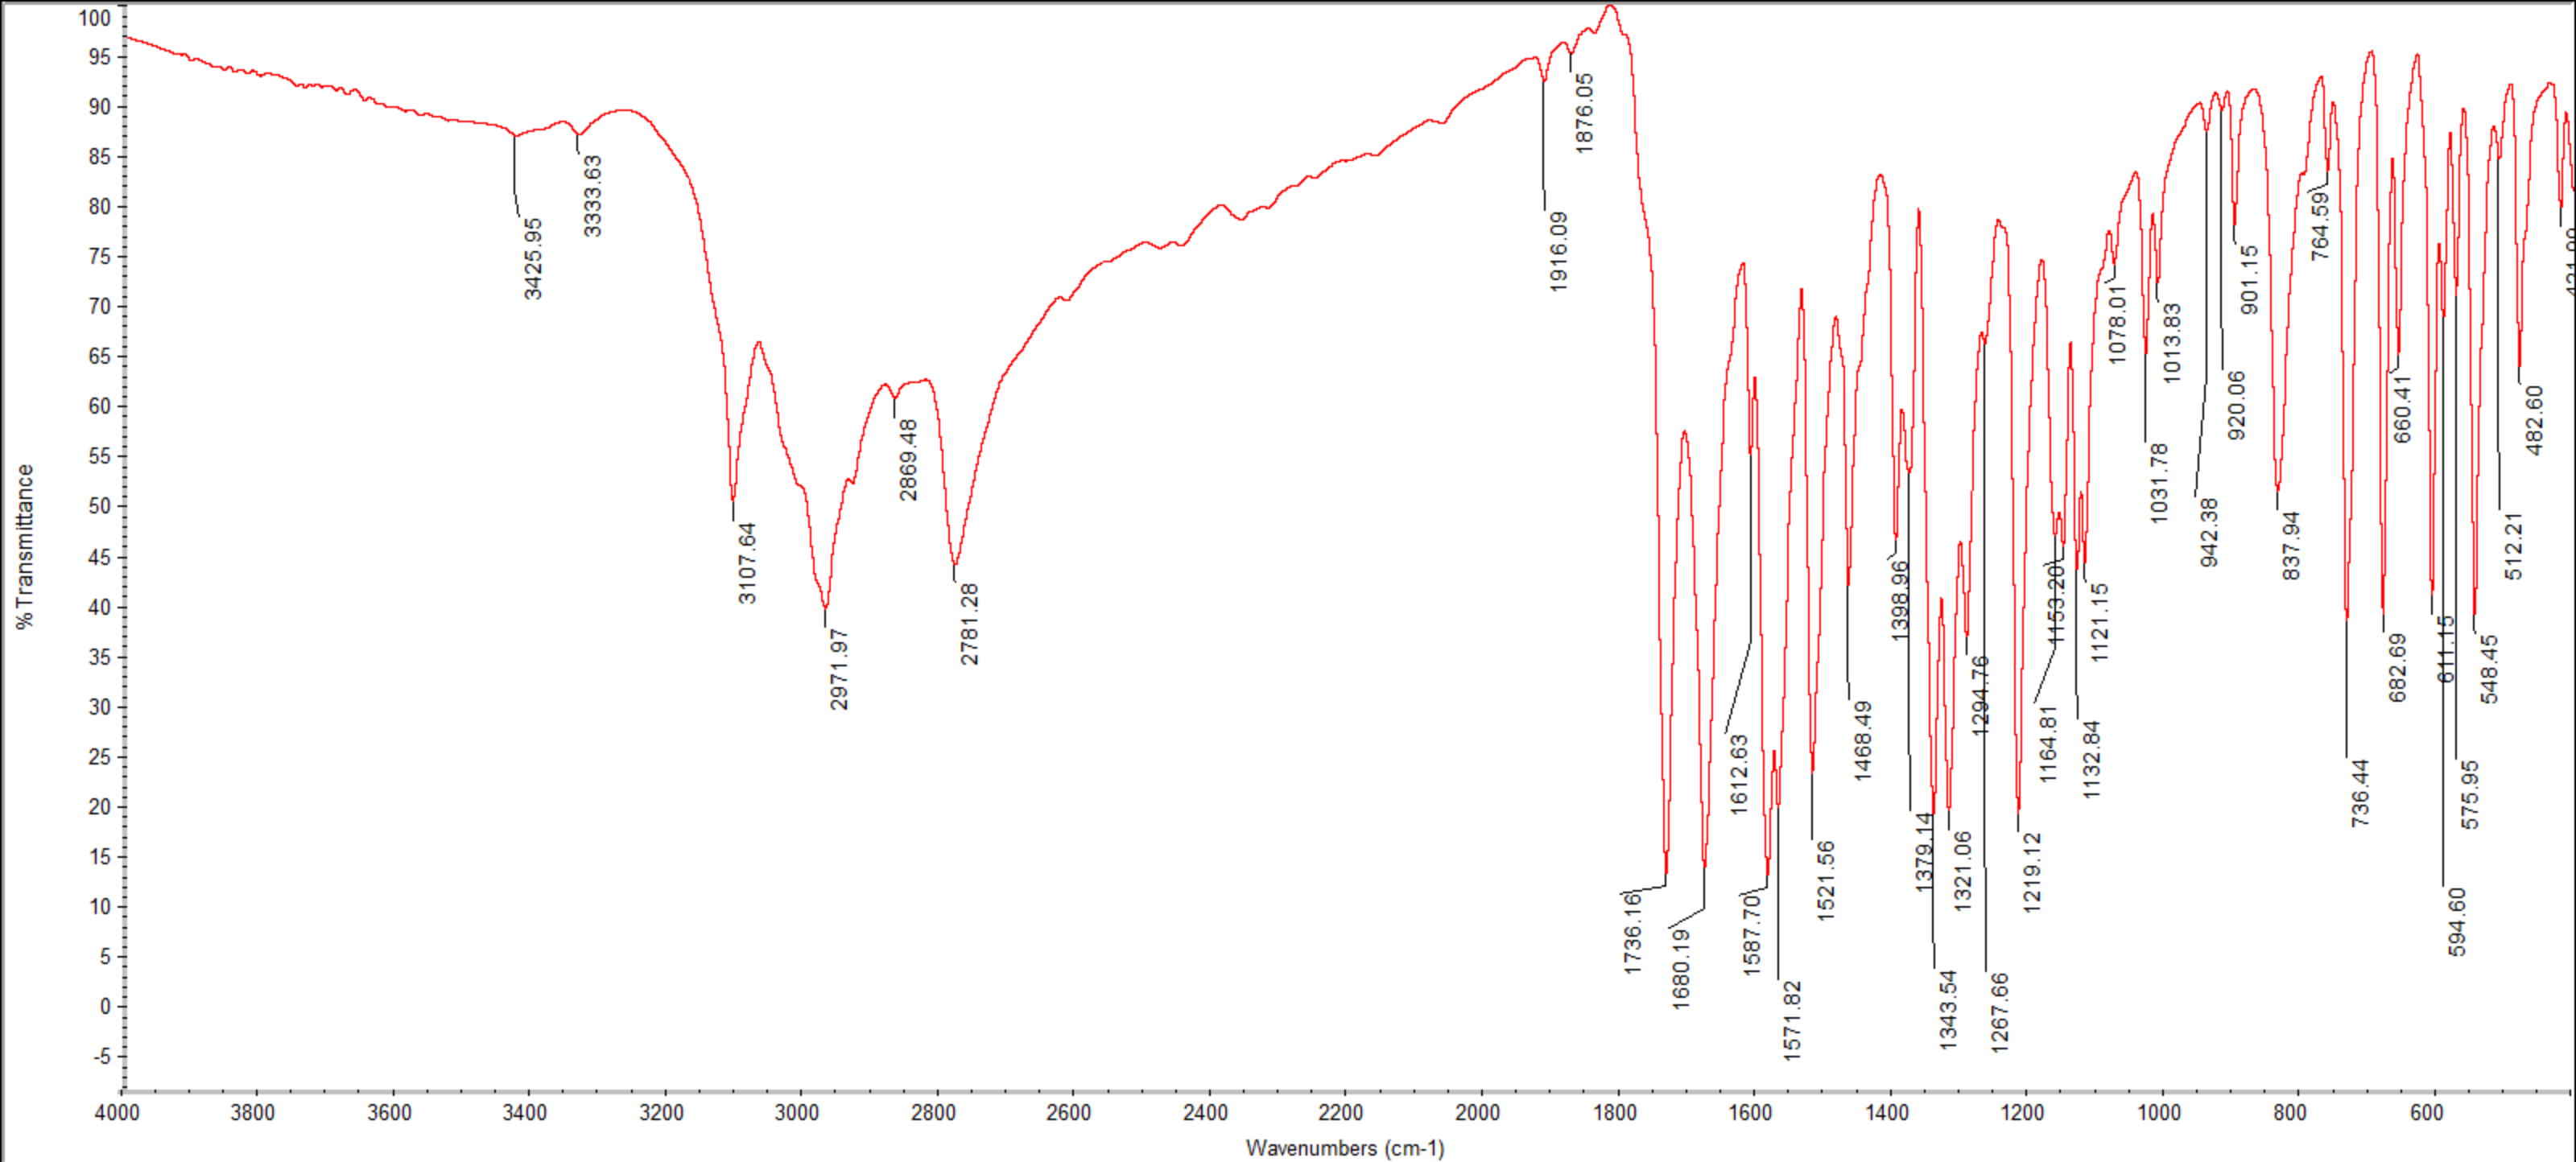

1H NMR of 7d

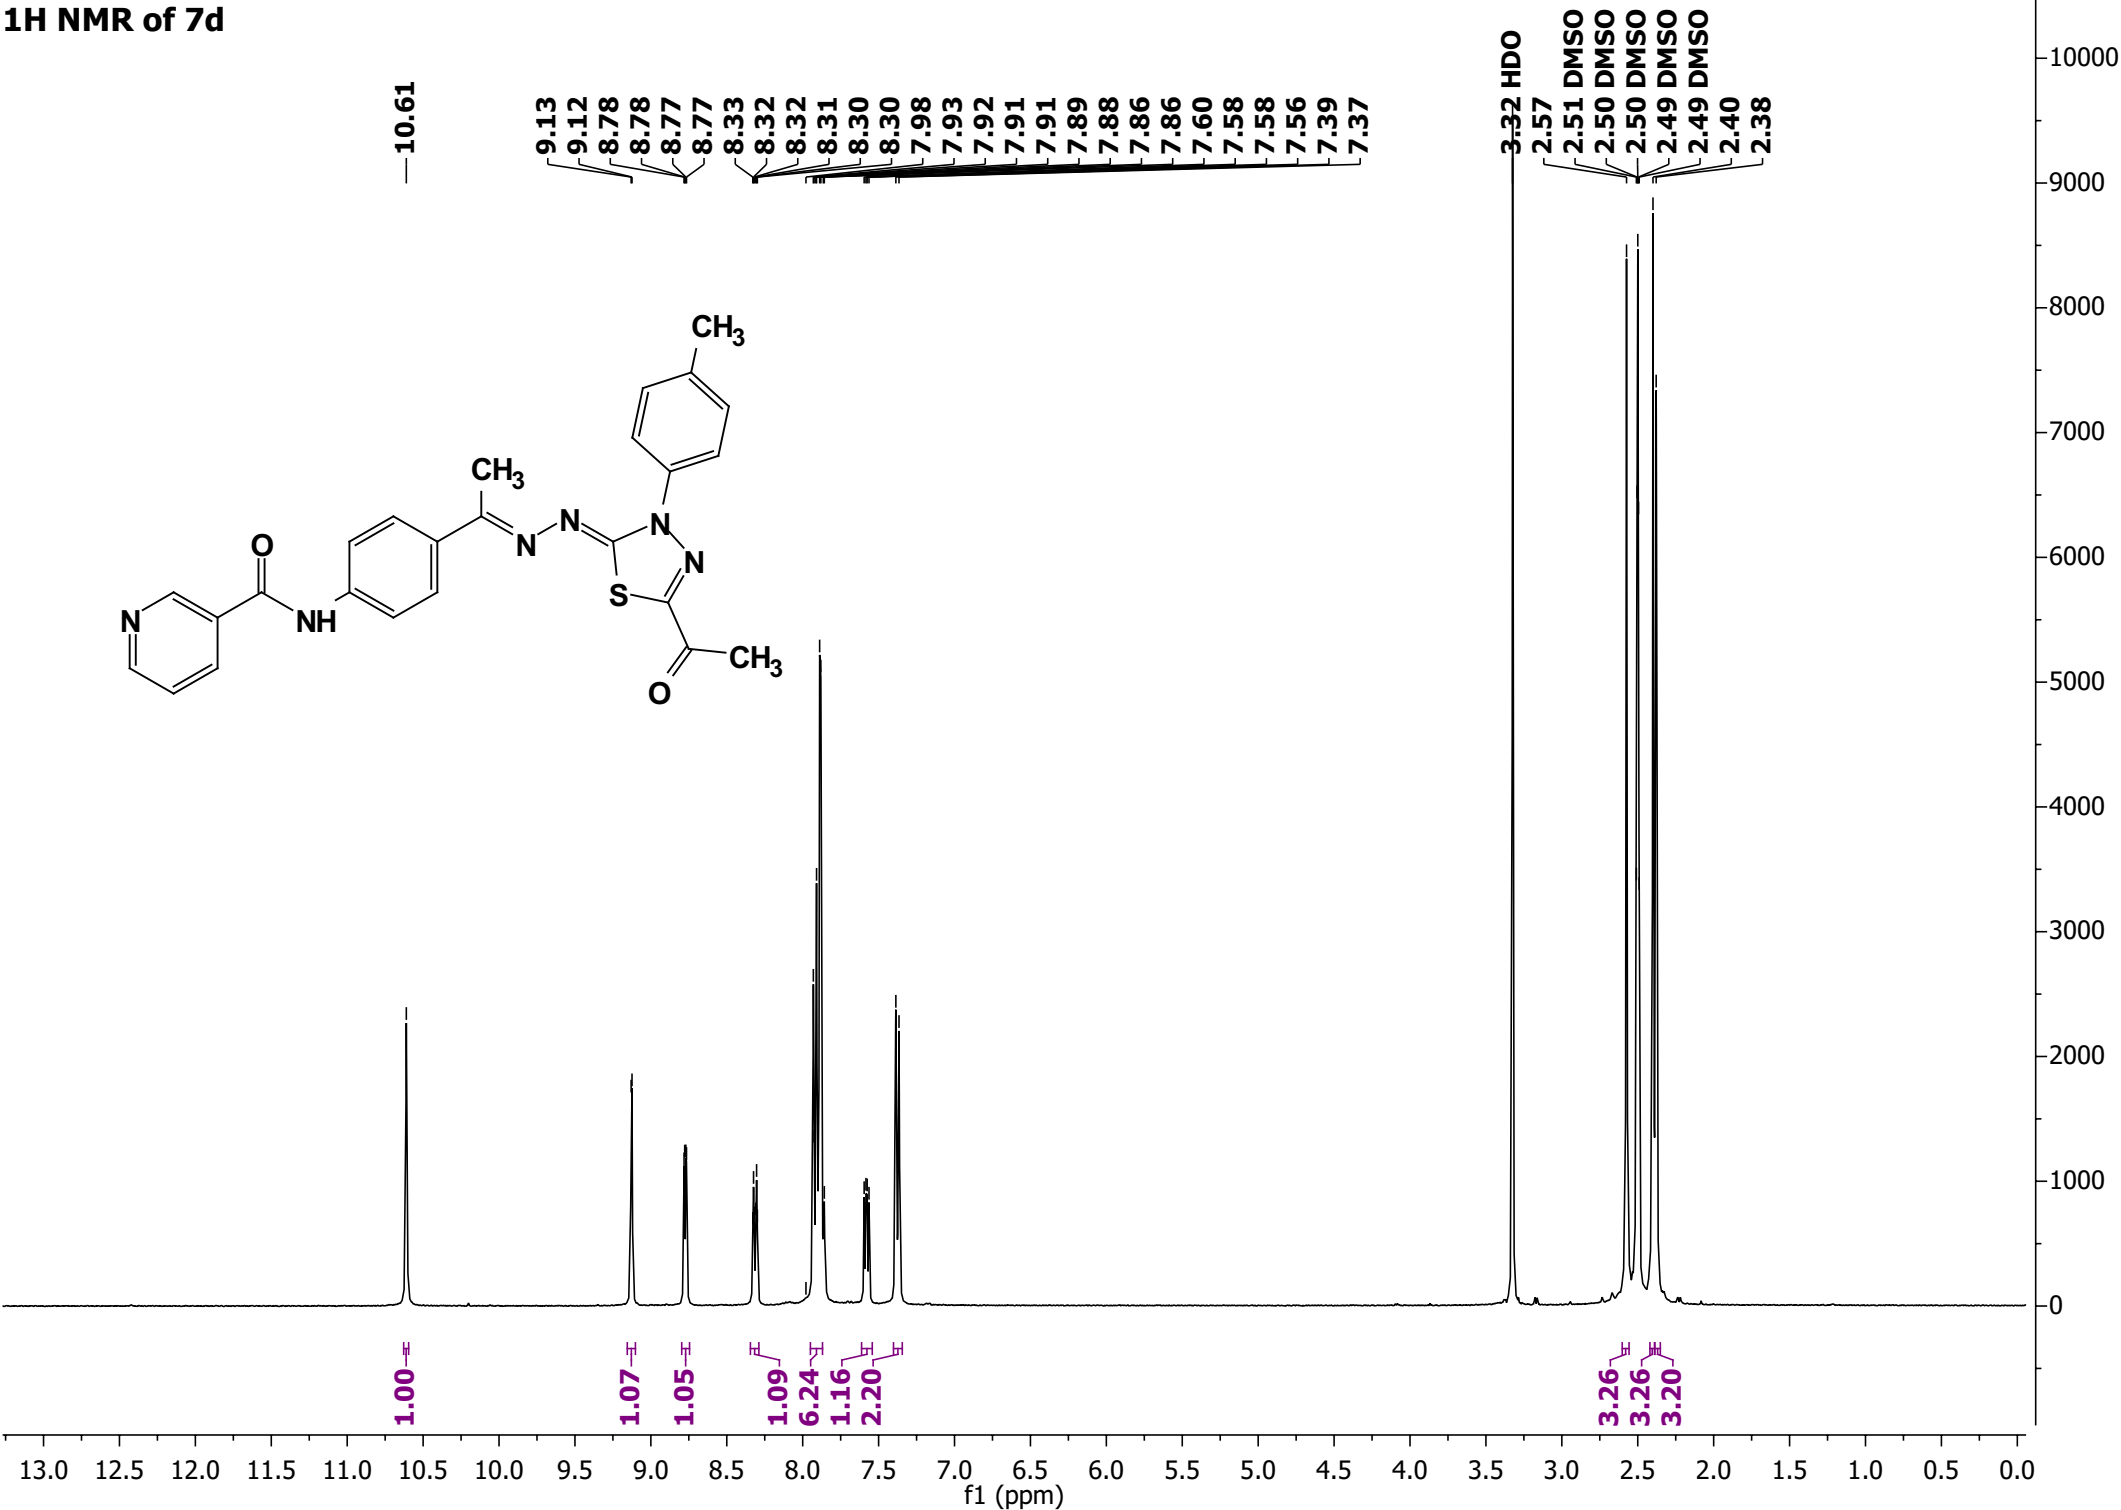

# **<sup>13</sup>C NMR of 7d**

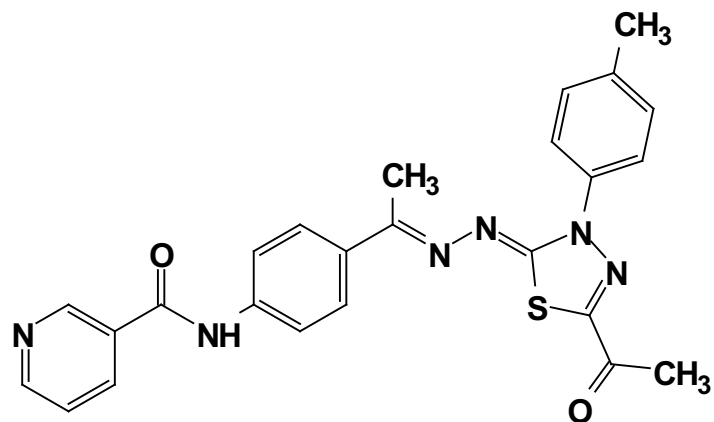

189.71

164.25

164.19

159.71

152.21

150.39

148.74

140.43

136.76

136.40

135.54

132.66

130.45

129.52

127.02

123.51

122.04

119.88

40.20 DMSO

40.15 DMSO

39.94 DMSO

39.73 DMSO

39.52 DMSO

39.31 DMSO

39.10 DMSO

38.90 DMSO

25.01

20.62

15.18

210 200 190 180 170 160 150 140 130 120 110 100 90 80 70 60 50 40 30 20 10 0 -10

f1 (ppm)

12000  
11000  
10000  
9000  
8000  
7000  
6000  
5000  
4000  
3000  
2000  
1000  
0  
-1000

## SAMPLE INFORMATION

|                   |                            |                     |                                 |
|-------------------|----------------------------|---------------------|---------------------------------|
| Sample Name:      | WN-6                       | Acquired By:        | YARA                            |
| Sample Type:      | Unknown                    | Sample Set Name:    |                                 |
| Vial:             | 37                         | Acq. Method Set:    | Organic                         |
| Injection #:      | 1                          | Processing Method:  | Default                         |
| Injection Volume: | 4.00 ul                    | Channel Name:       | 334.0nm                         |
| Run Time:         | 20.0 Minutes               | Proc. Chnl. Descr.: | W2996 FDA 334.0 nm(FDA 190.0 to |
|                   |                            |                     |                                 |
| Date Acquired:    | 22/05/2024 04:18:28 PM EET |                     |                                 |
| Date Processed:   | 23/05/2024 11:53:49 AM EET |                     |                                 |

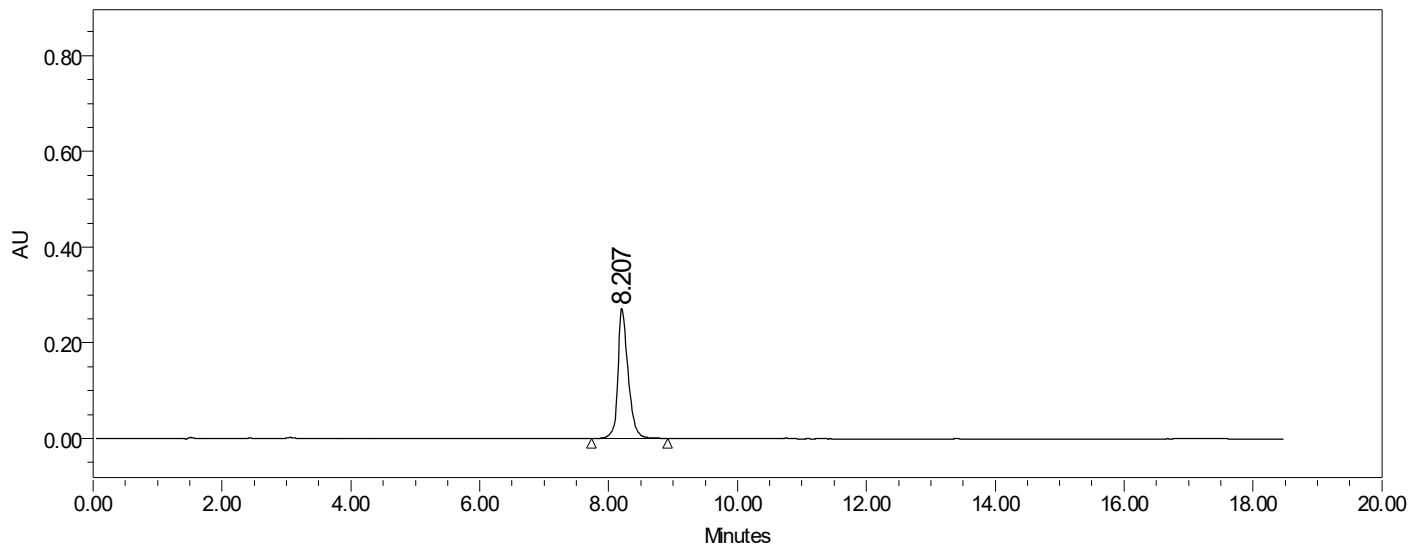

|   | RT    | Area    | % Area | Height |
|---|-------|---------|--------|--------|
| 1 | 8.207 | 3010648 | 100.00 | 273113 |

# Mass spec. of compound 7d

wn6 #189 RT: 3.18 P: + NL: 1.56E3  
T: {0,0} + c EI Full ms [40.00-1000.00]

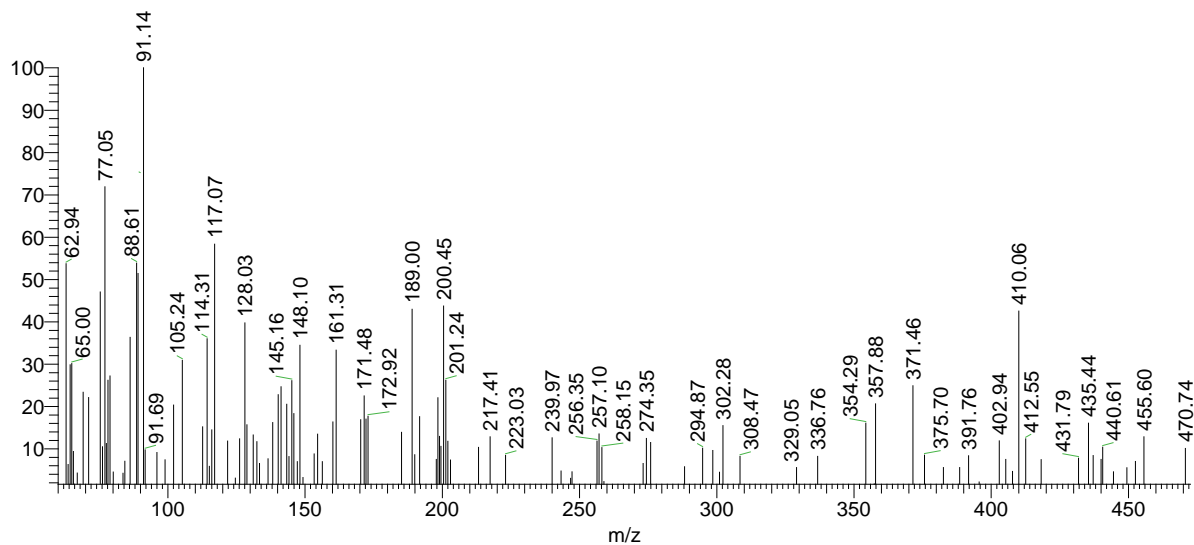

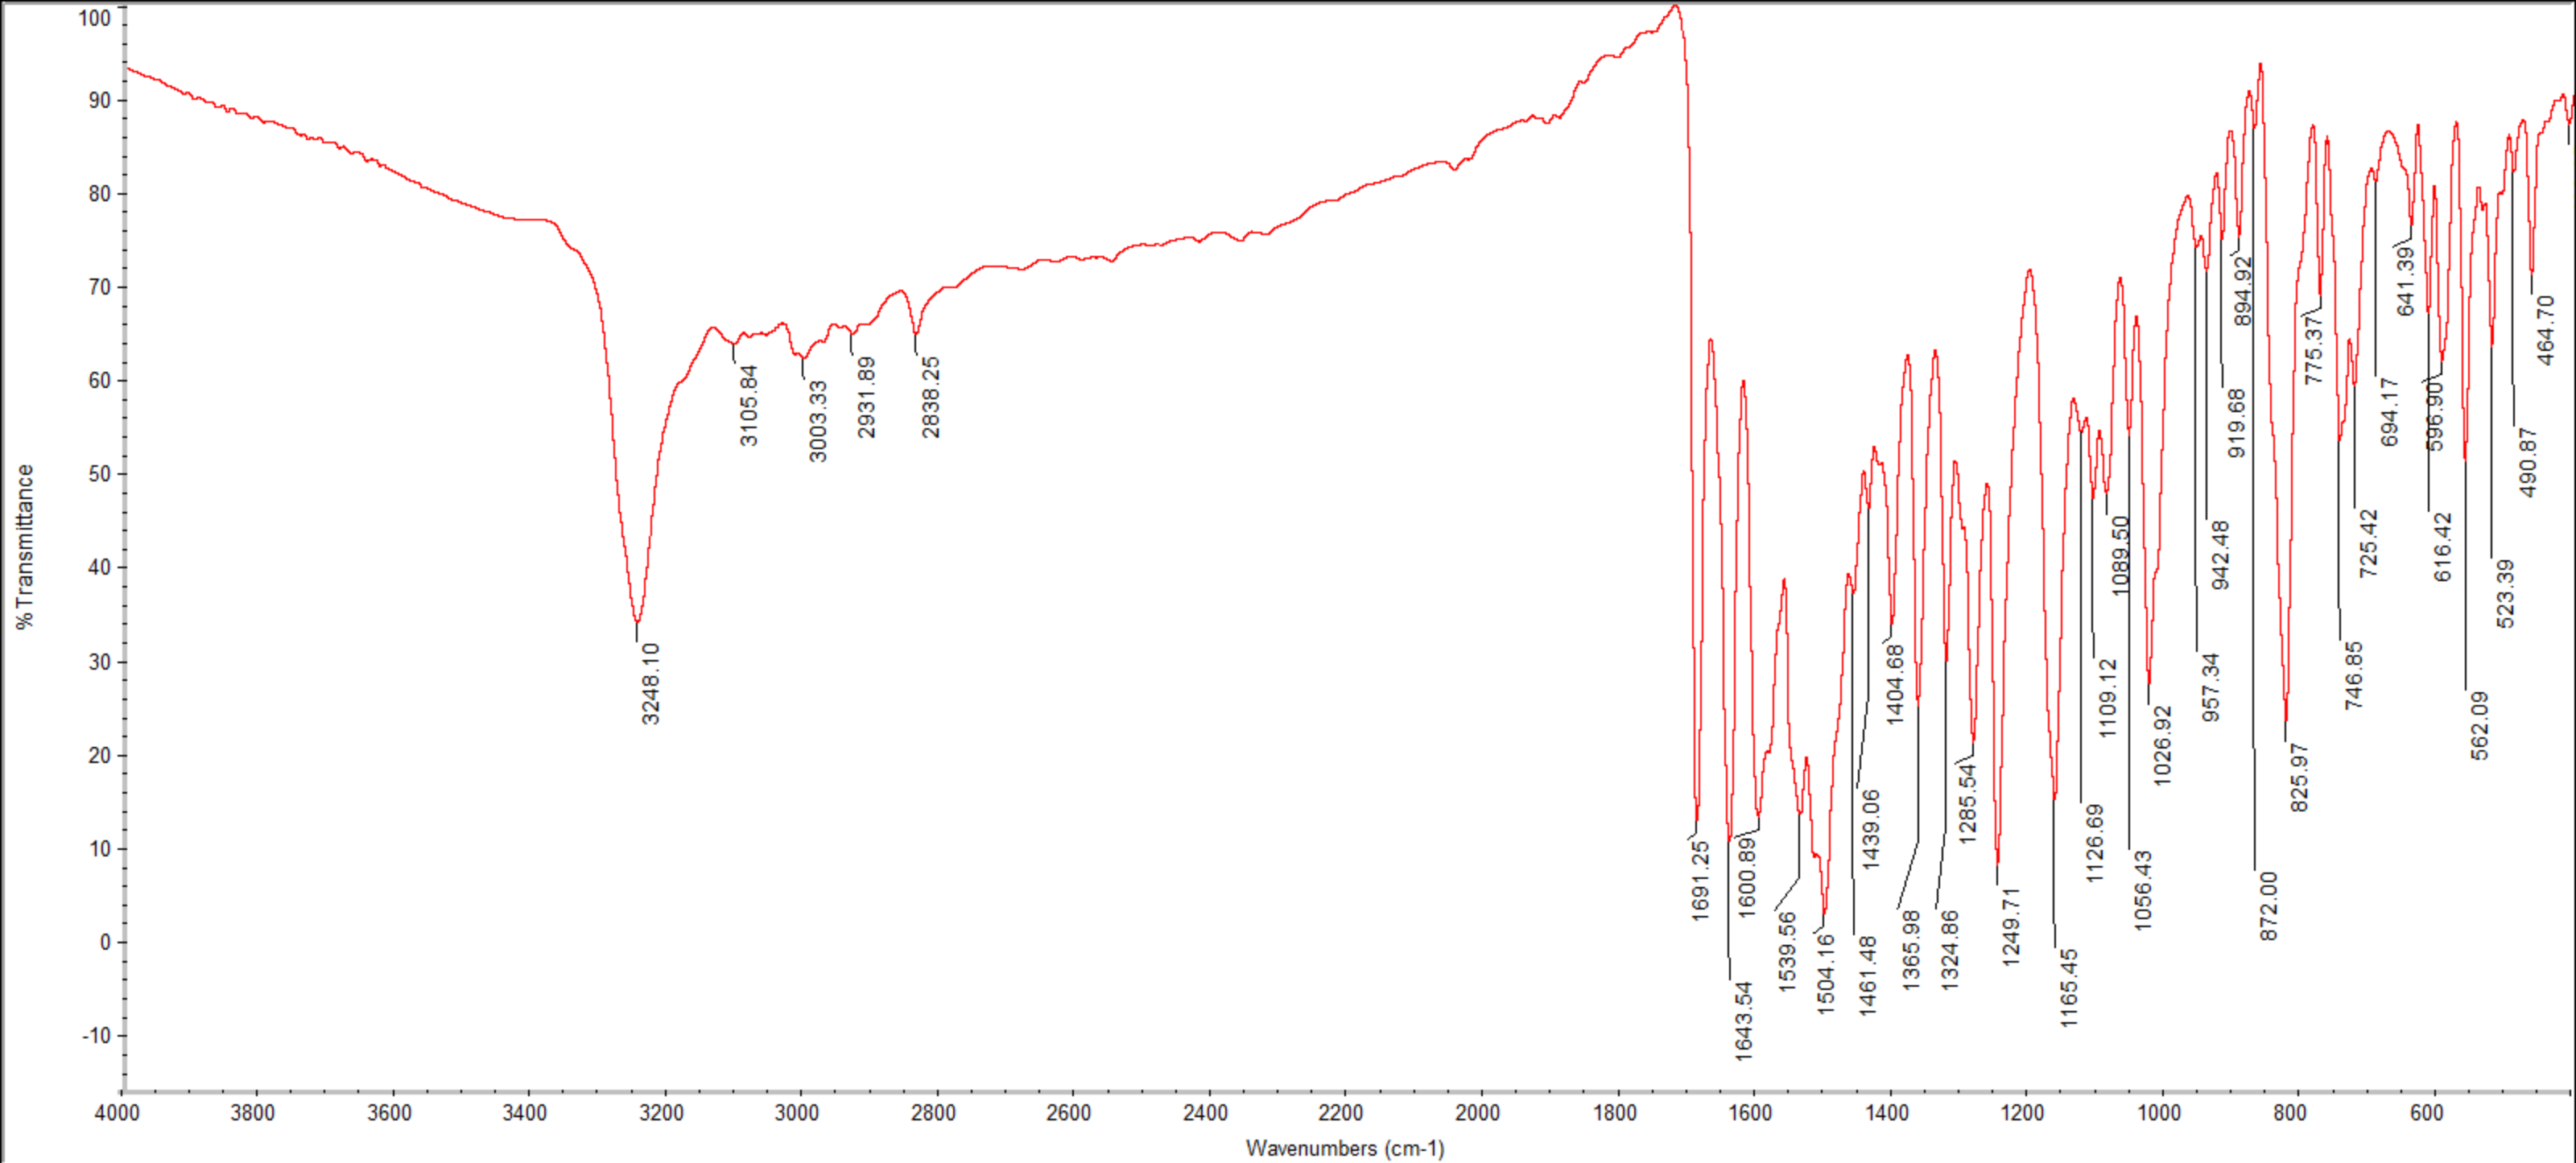



1H NMR of 7e

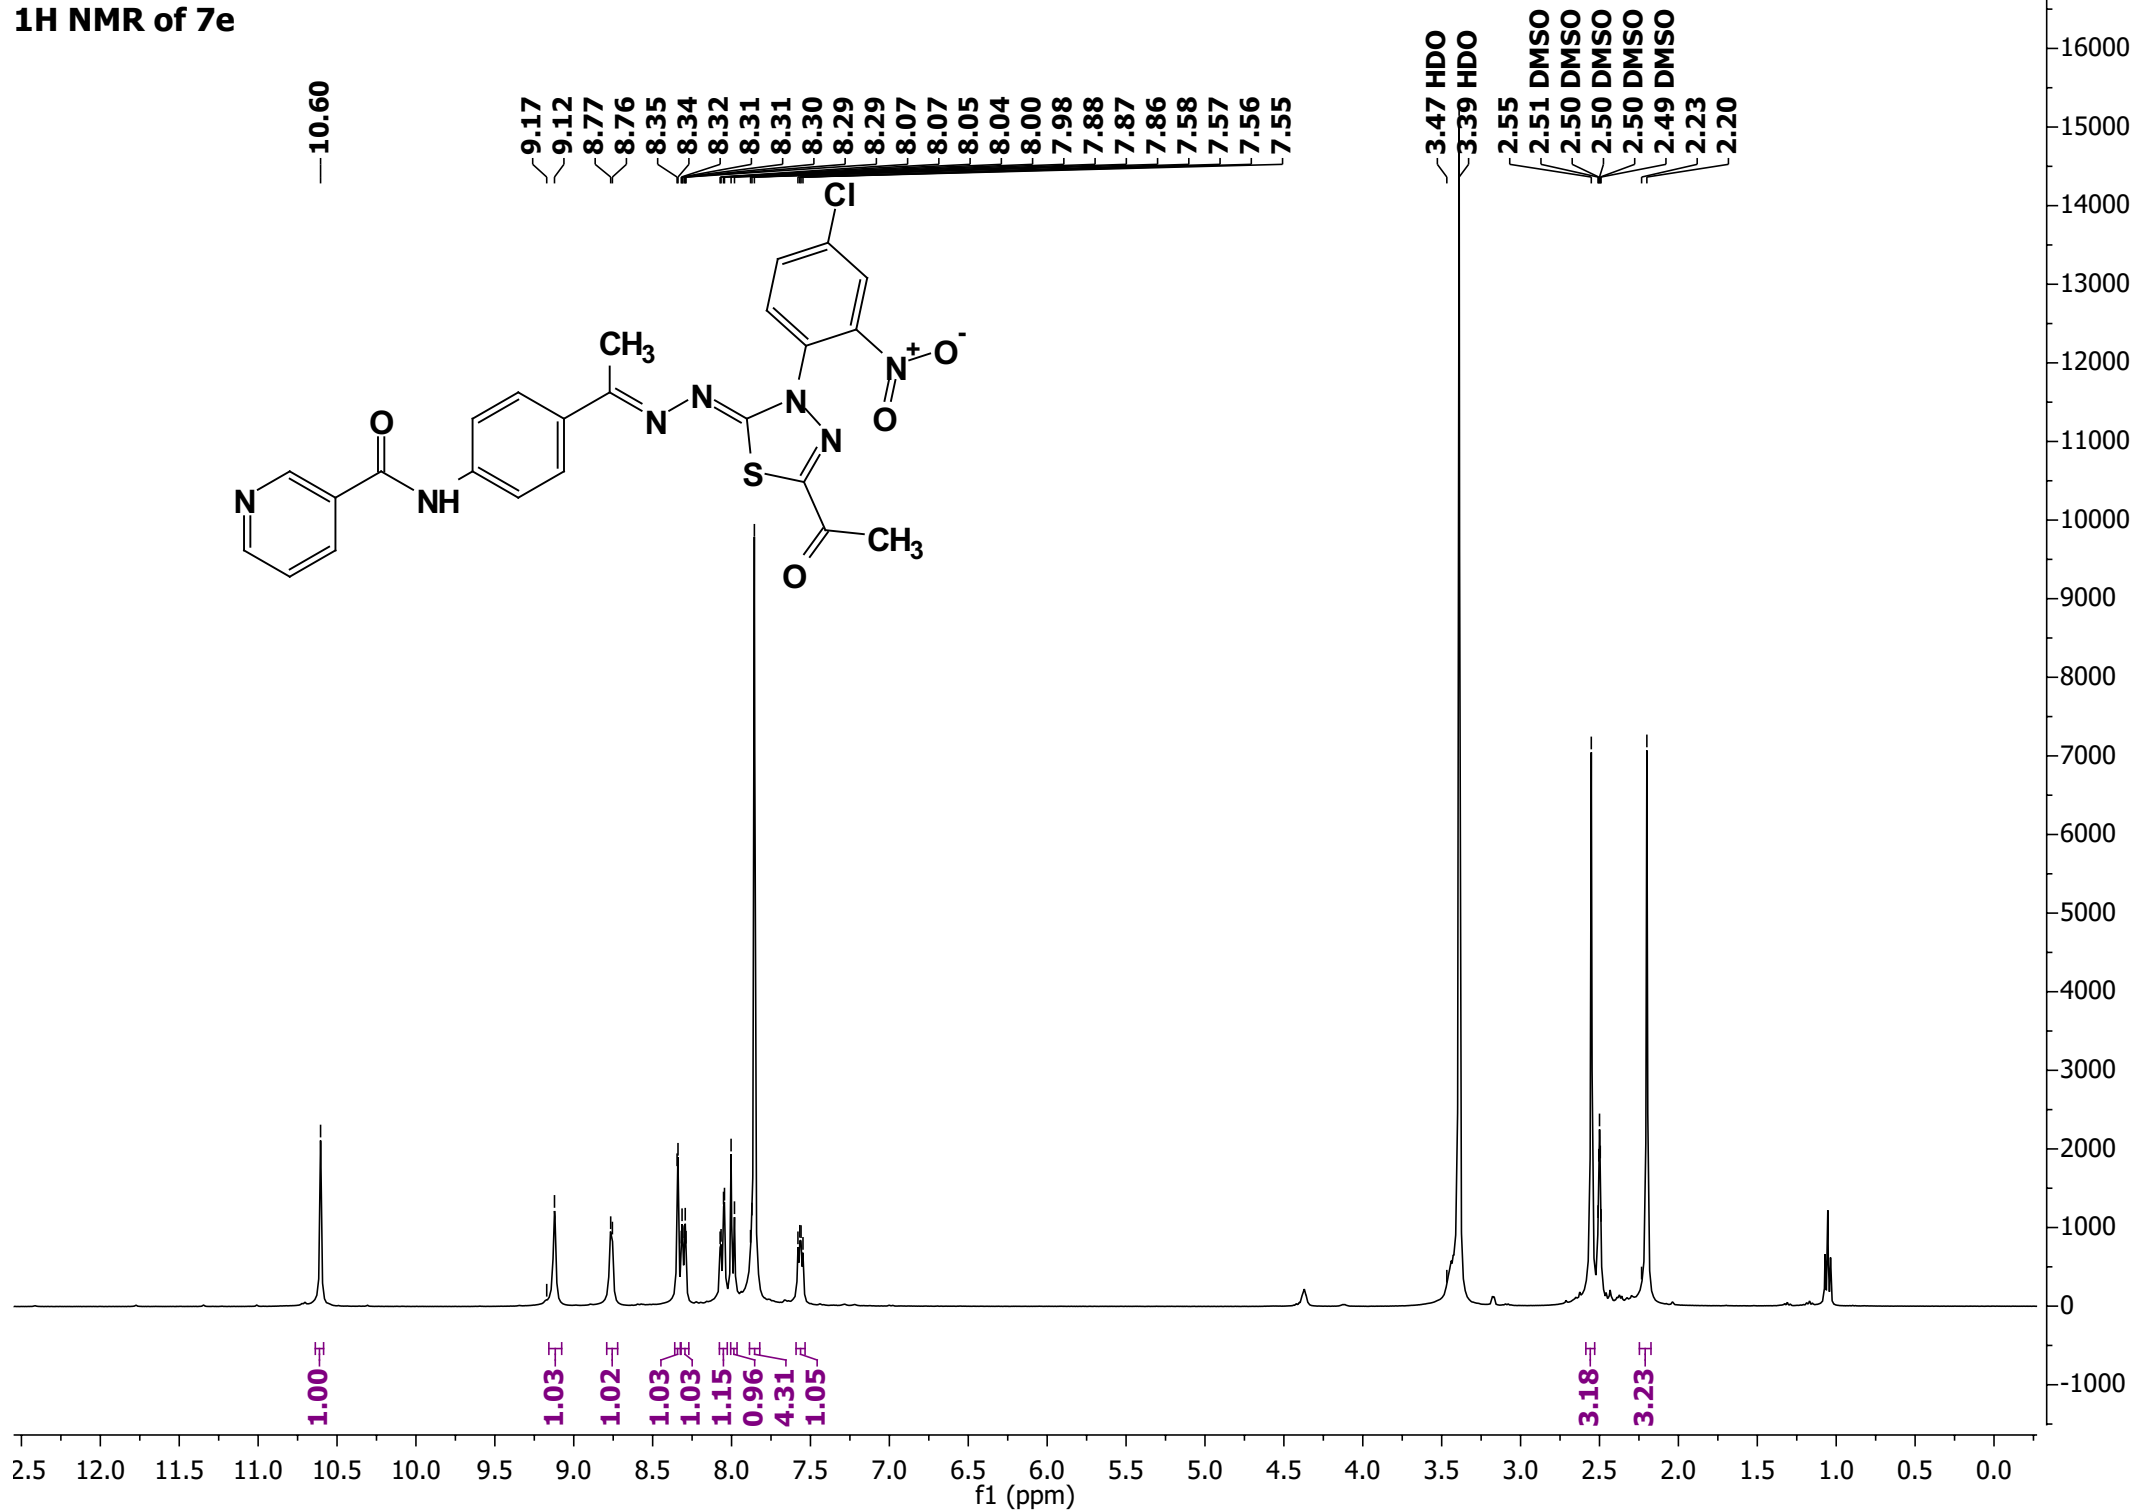

**<sup>13</sup>C NMR of 7e**

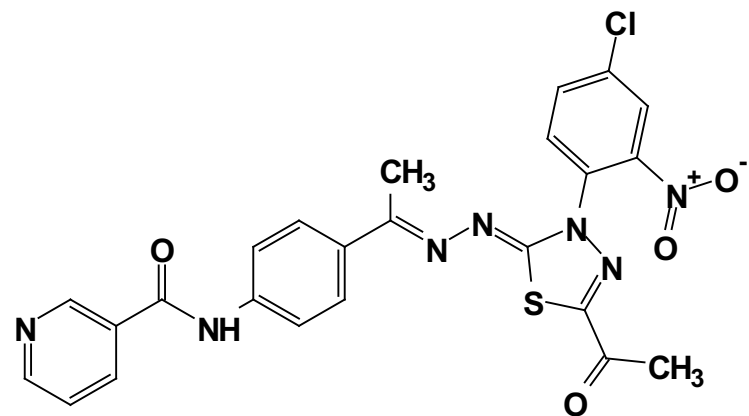

189.52  
164.22  
163.08  
160.72  
152.22  
152.01  
148.77  
144.21  
140.62  
135.56  
134.54  
134.02  
132.41  
130.45  
129.87  
128.99  
127.11  
125.43  
123.52  
119.85

40.15 DMSO  
39.94 DMSO  
39.73 DMSO  
39.52 DMSO  
39.31 DMSO  
39.10 DMSO  
38.89 DMSO  
25.04  
14.68

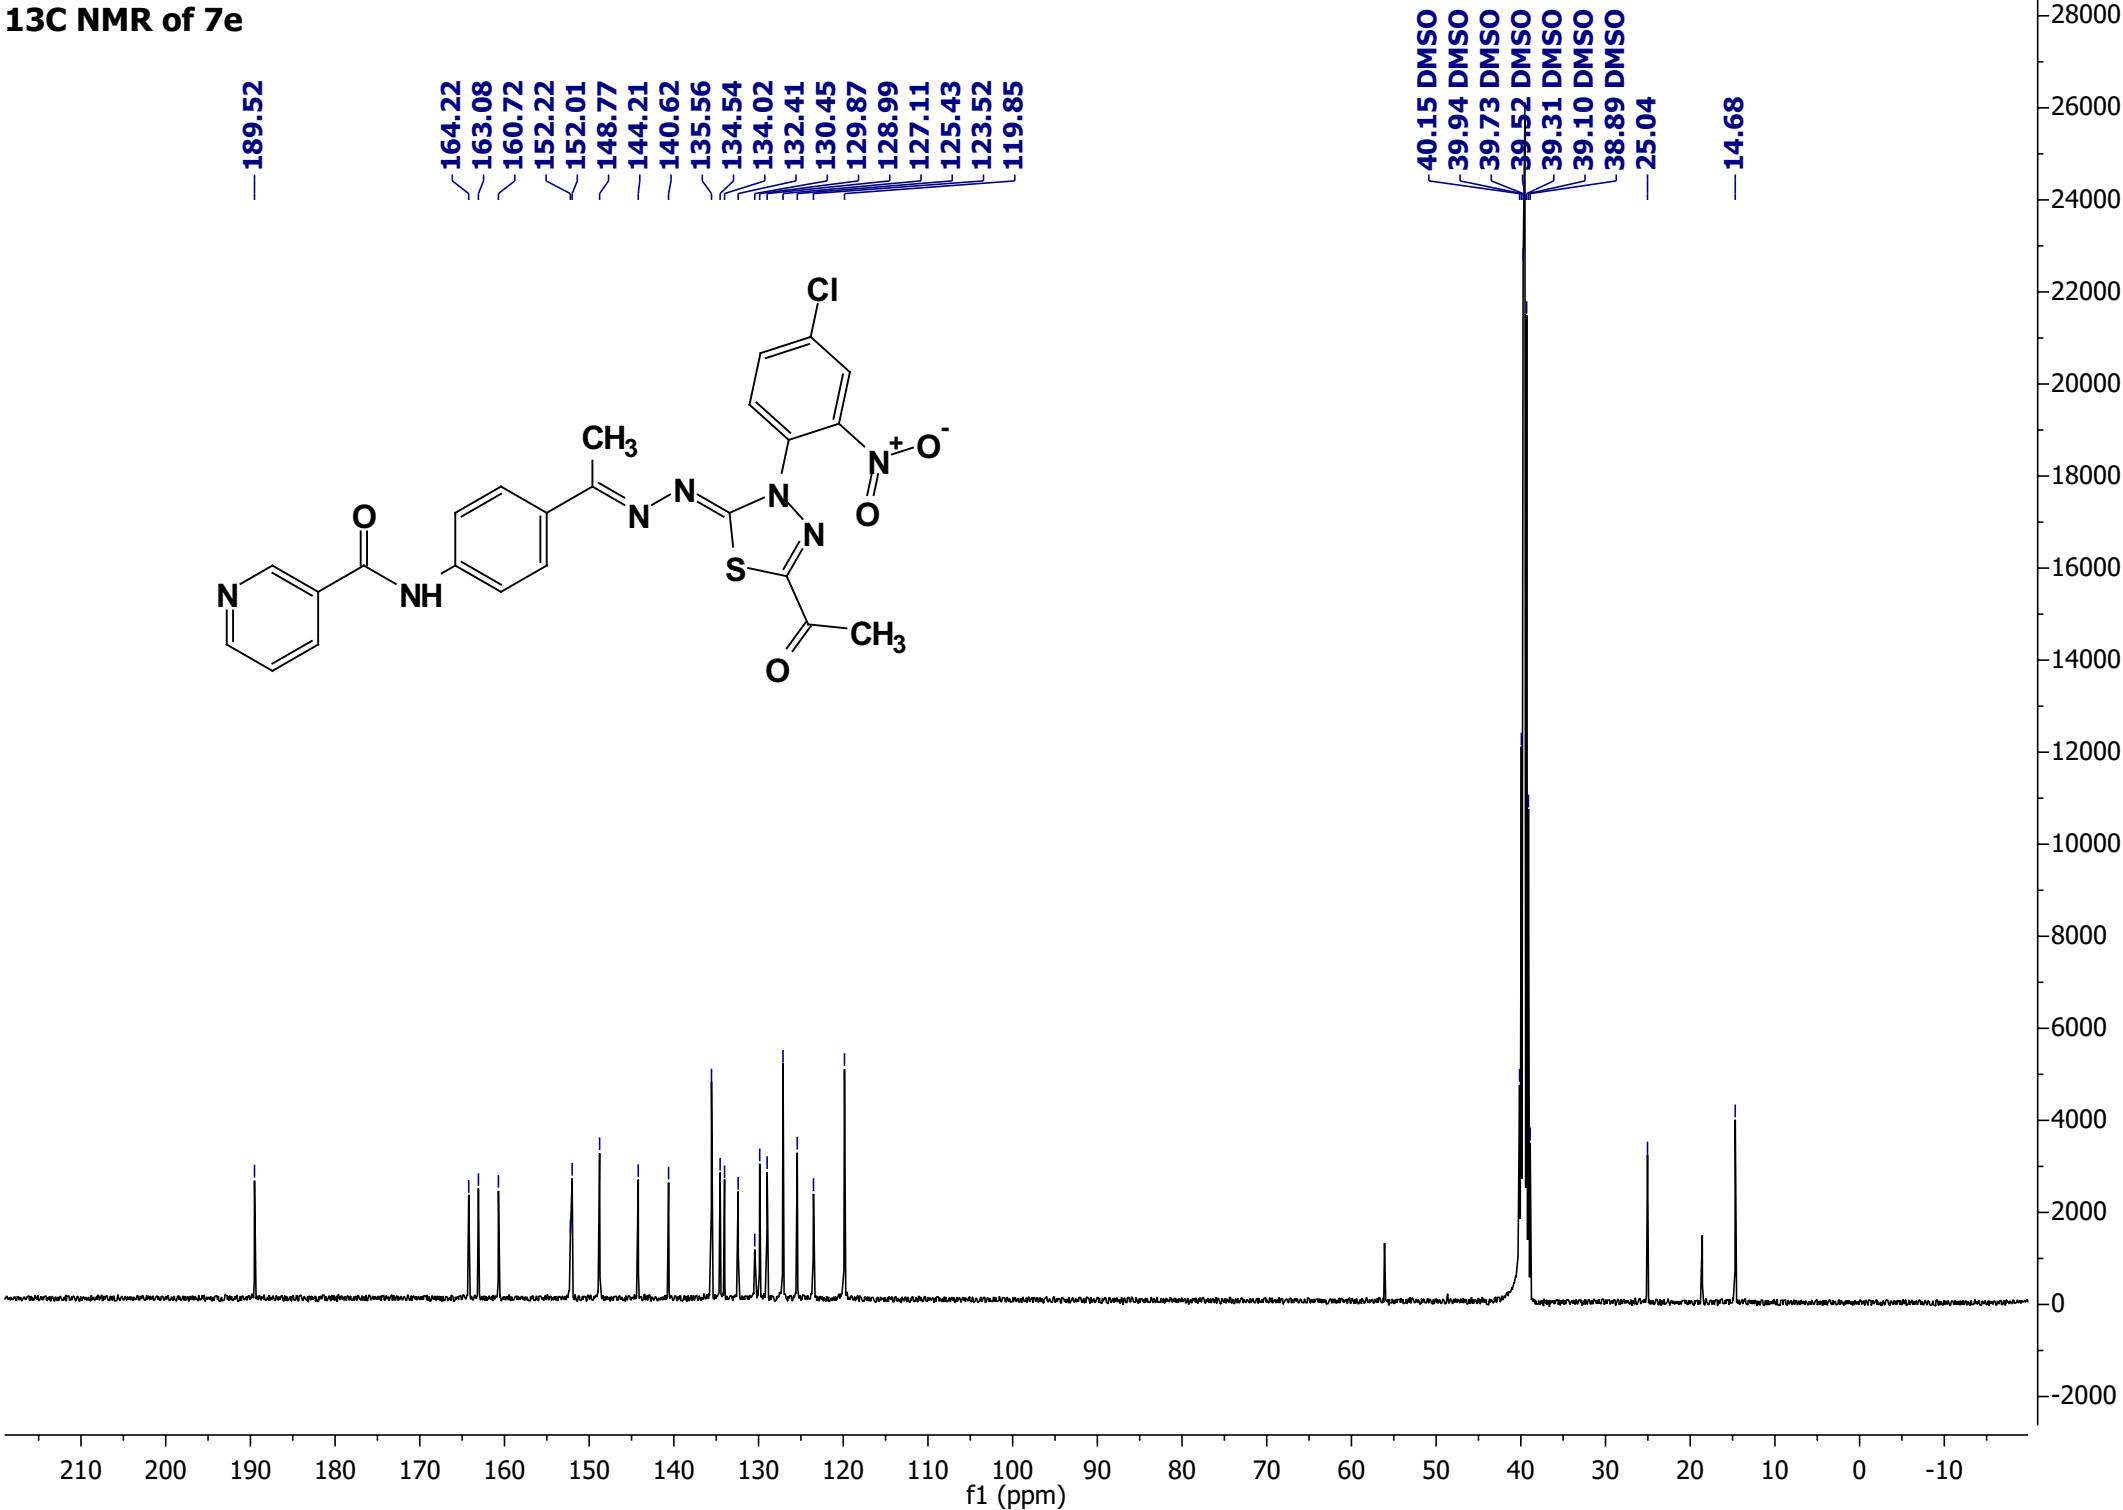

# Mass spec. of compound 7e

HAZEM-WN-15 #123 RT: 2.08 AV: 1 NL: 8.80E3  
T: {0,0} + c EI Full ms [40.00-1000.00]

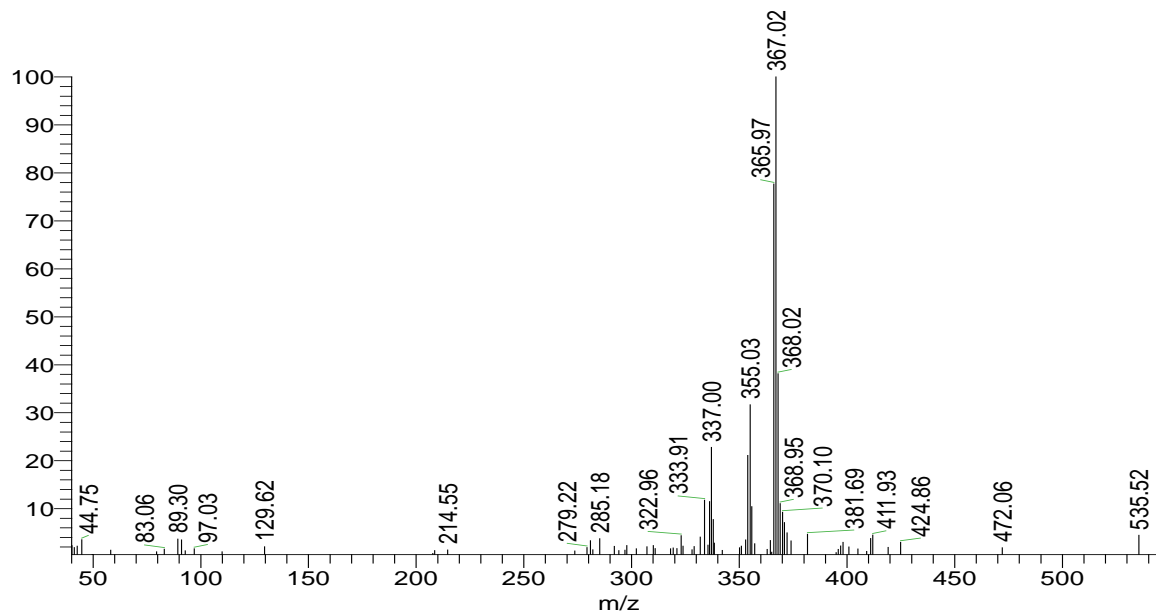

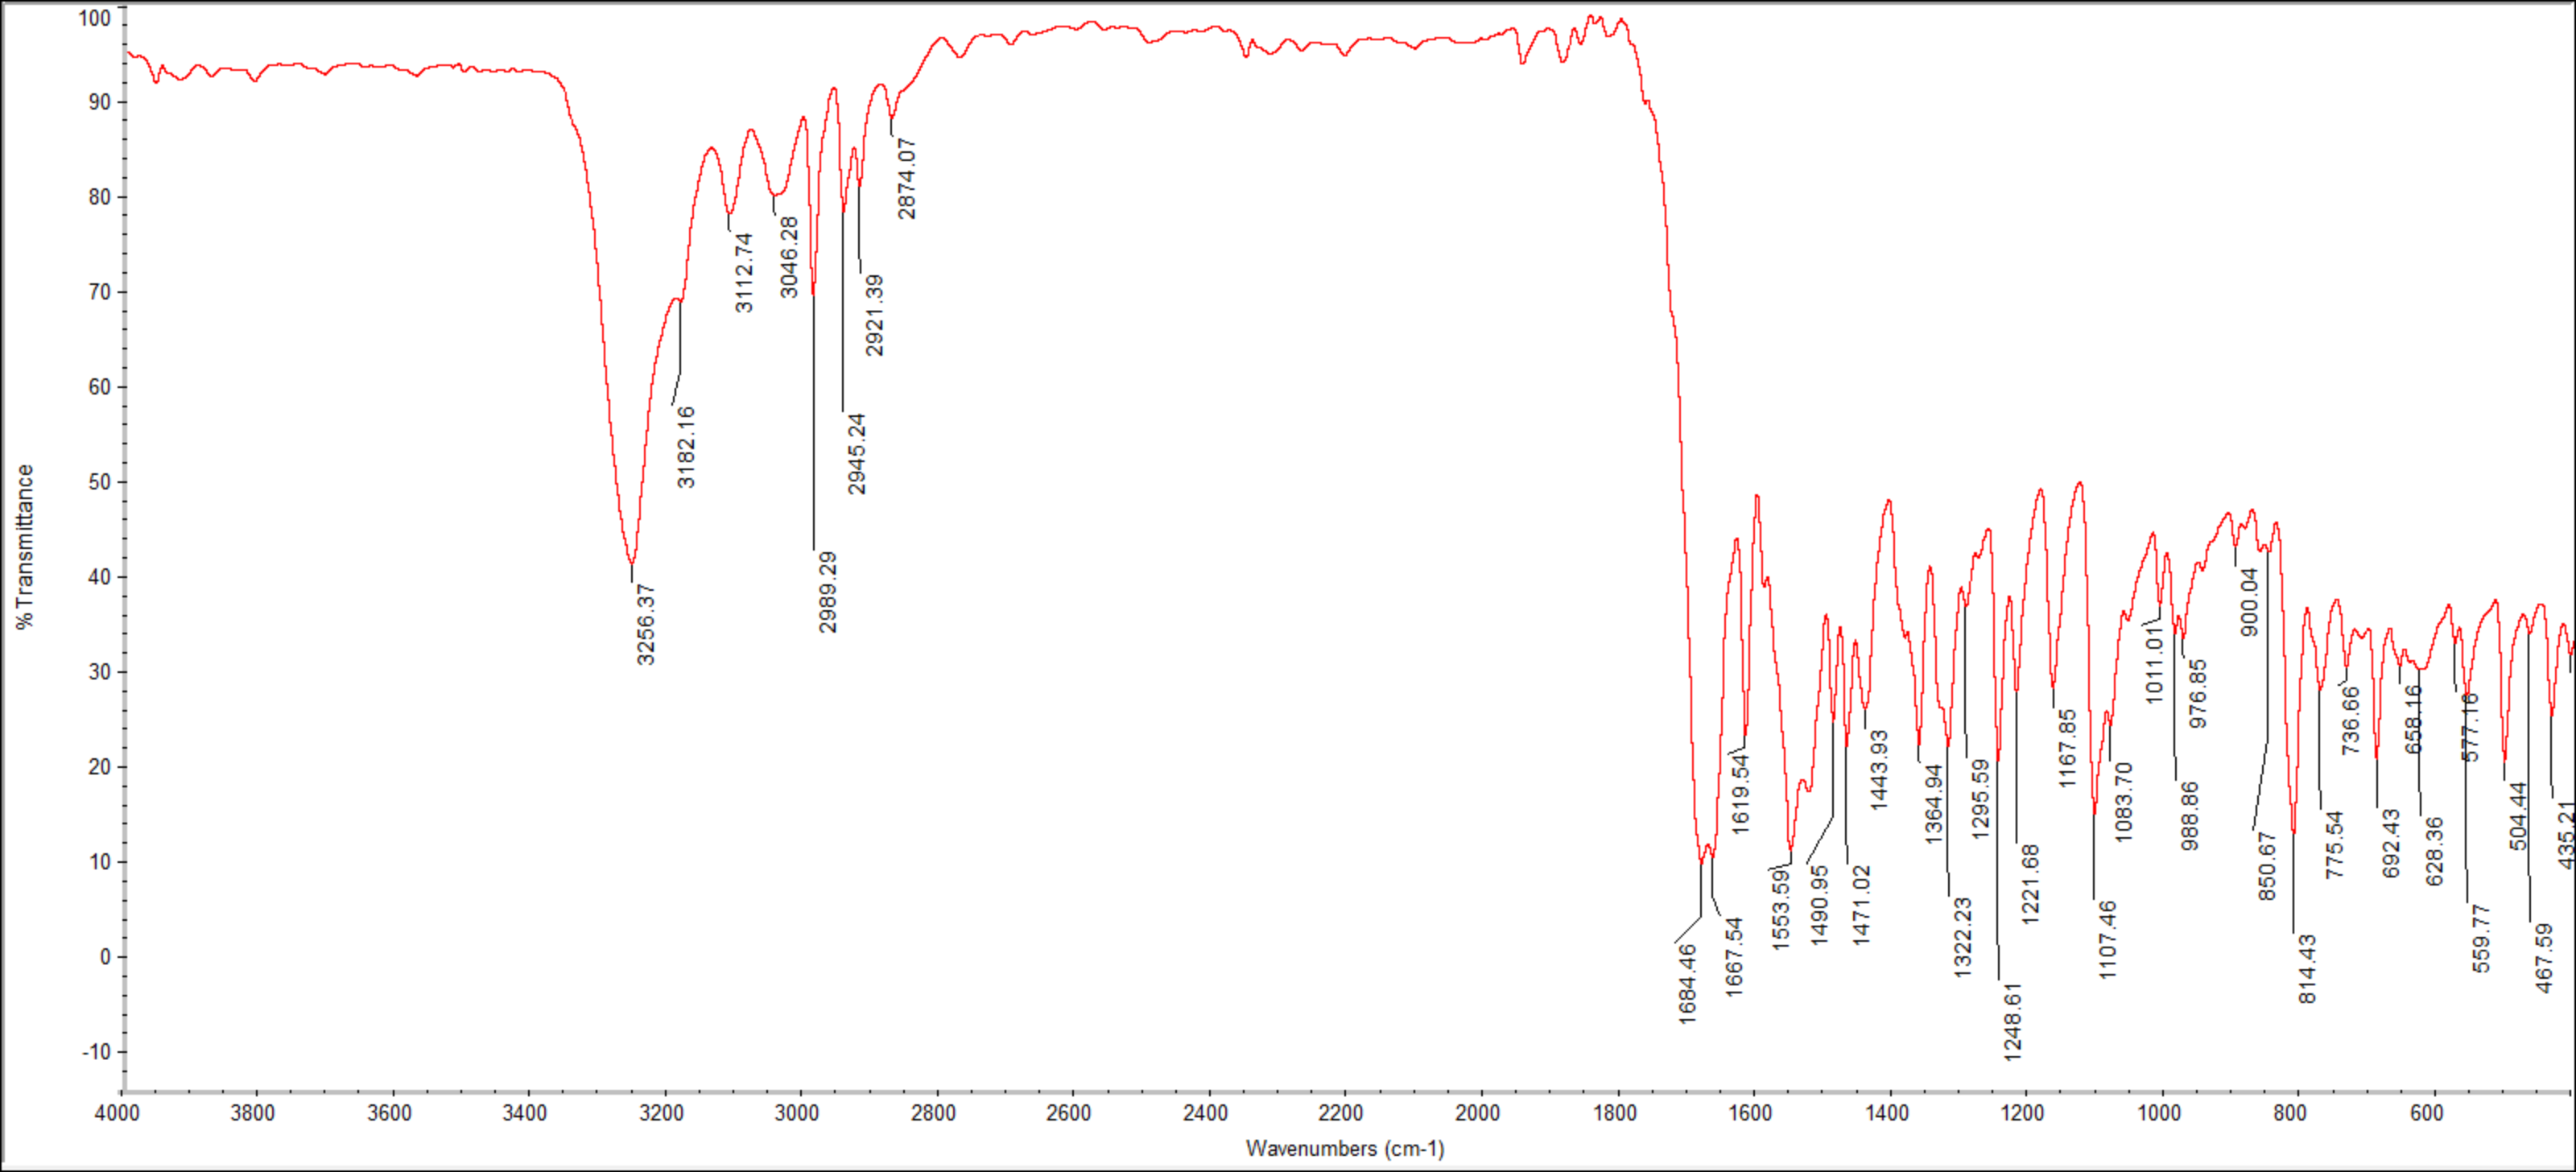

1H NMR of 7f

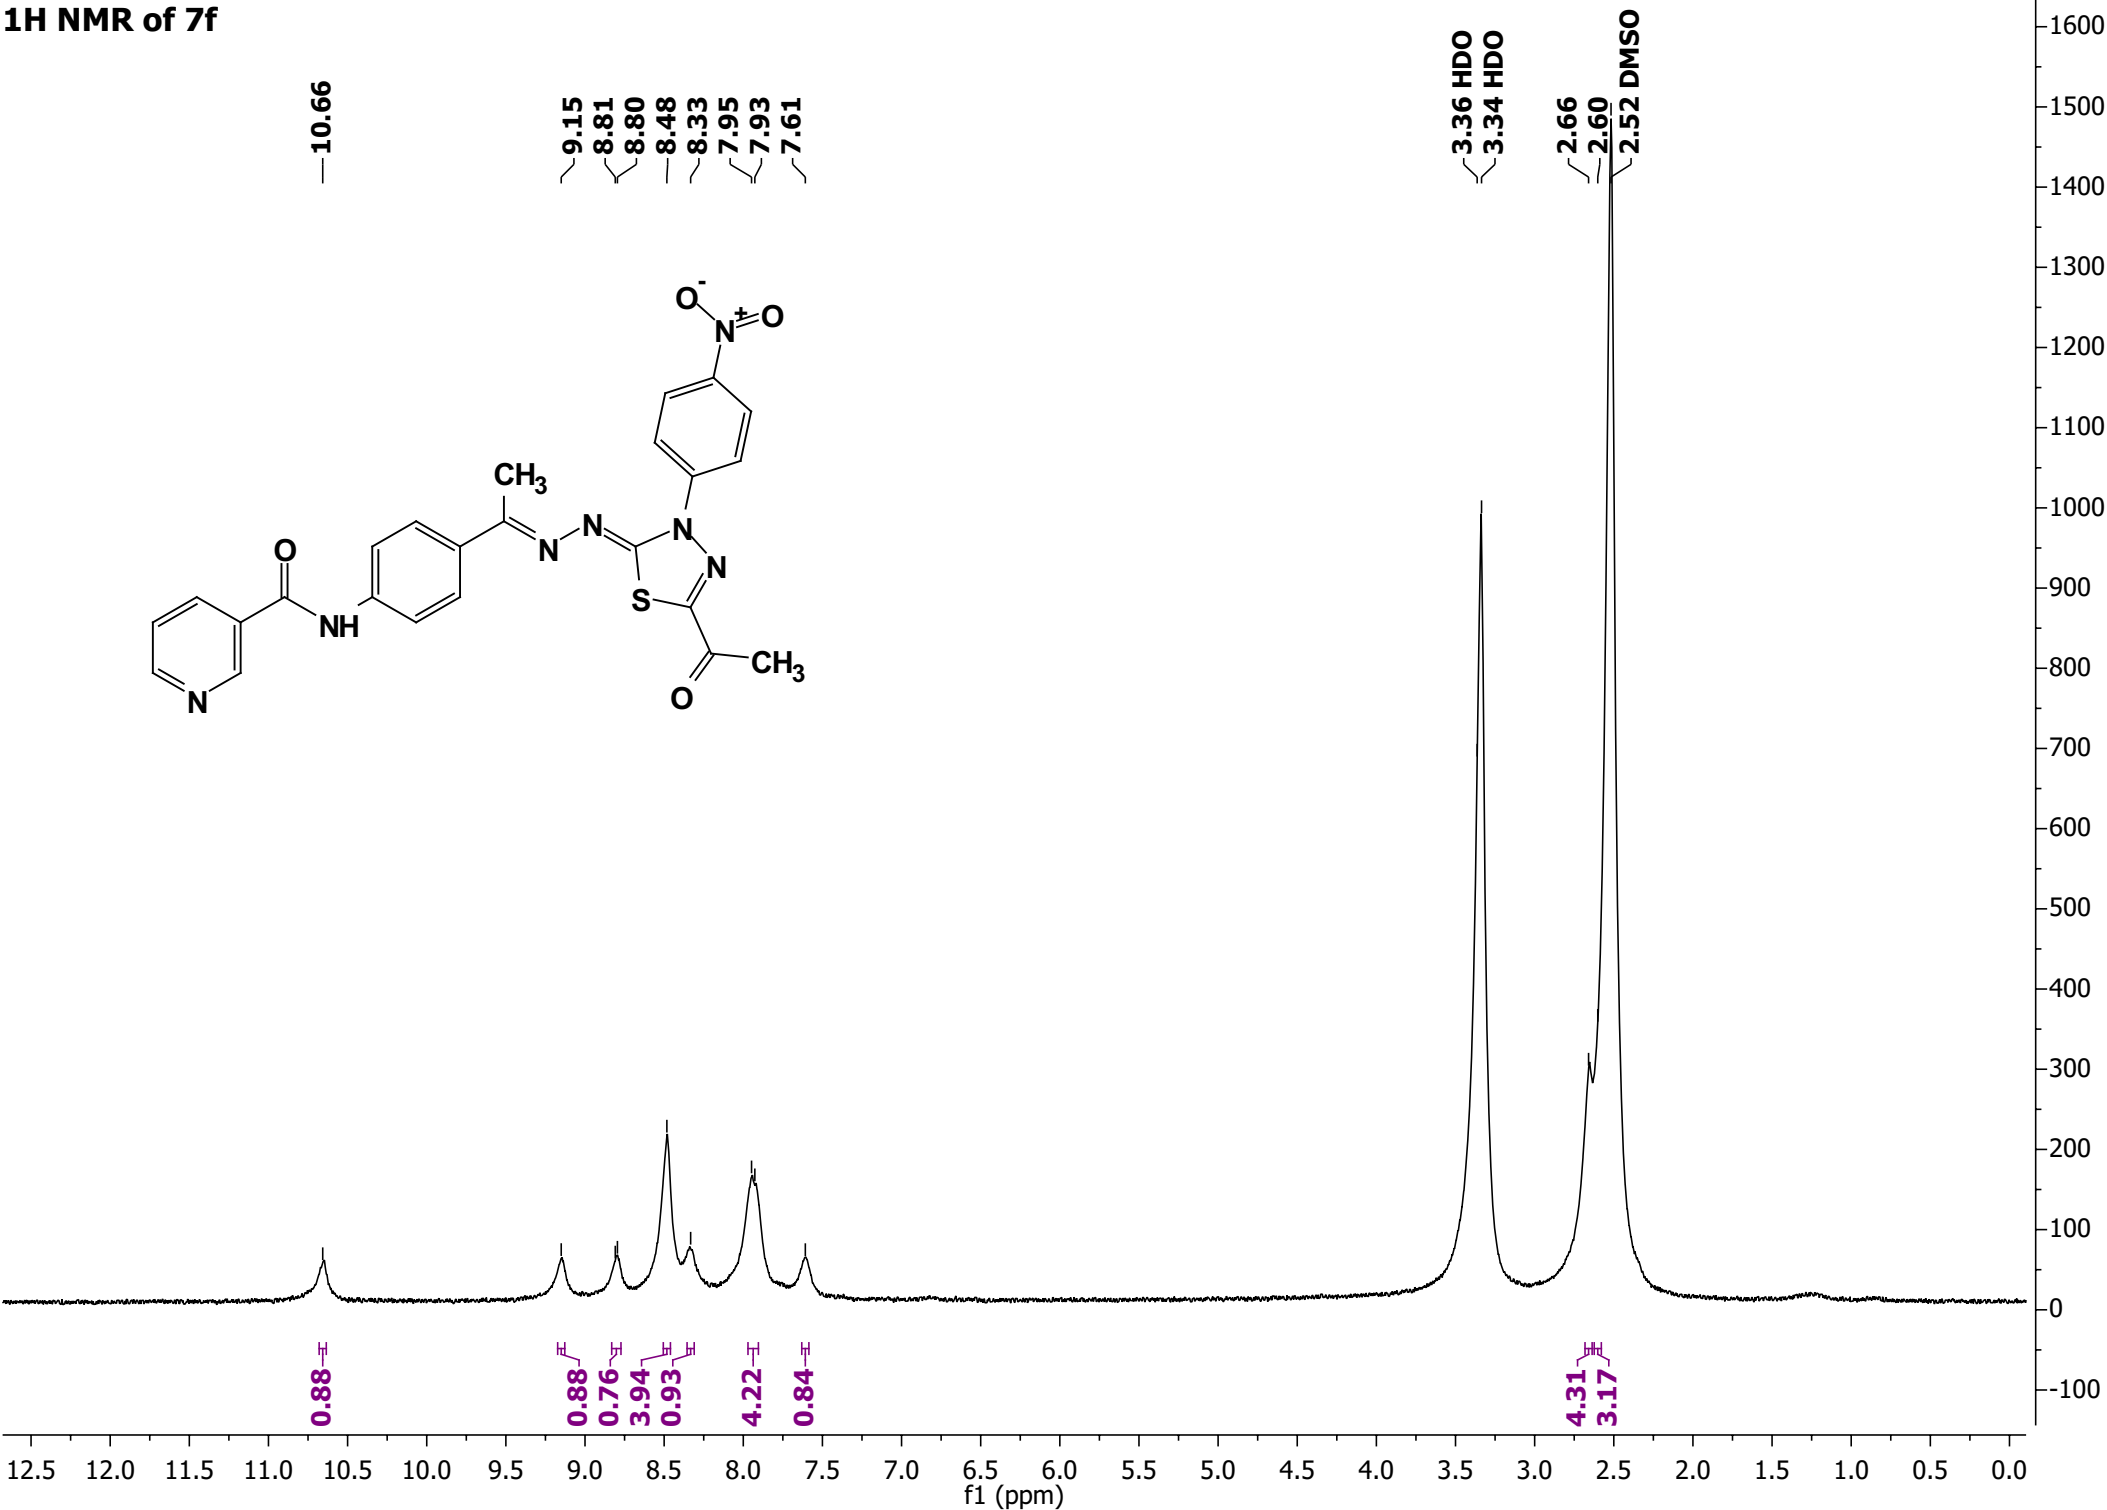

## SAMPLE INFORMATION

|                   |                            |                     |                                 |
|-------------------|----------------------------|---------------------|---------------------------------|
| Sample Name:      | WN-17                      | Acquired By:        | YARA                            |
| Sample Type:      | Unknown                    | Sample Set Name:    |                                 |
| Vial:             | 43                         | Acq. Method Set:    | Organic                         |
| Injection #:      | 1                          | Processing Method:  | Default                         |
| Injection Volume: | 4.00 ul                    | Channel Name:       | 373.0nm                         |
| Run Time:         | 20.0 Minutes               | Proc. Chnl. Descr.: | W2996 FDA 373.0 nm(FDA 190.0 to |
|                   |                            |                     |                                 |
| Date Acquired:    | 22/05/2024 06:41:06 PM EET |                     |                                 |
| Date Processed:   | 23/05/2024 11:51:39 AM EET |                     |                                 |

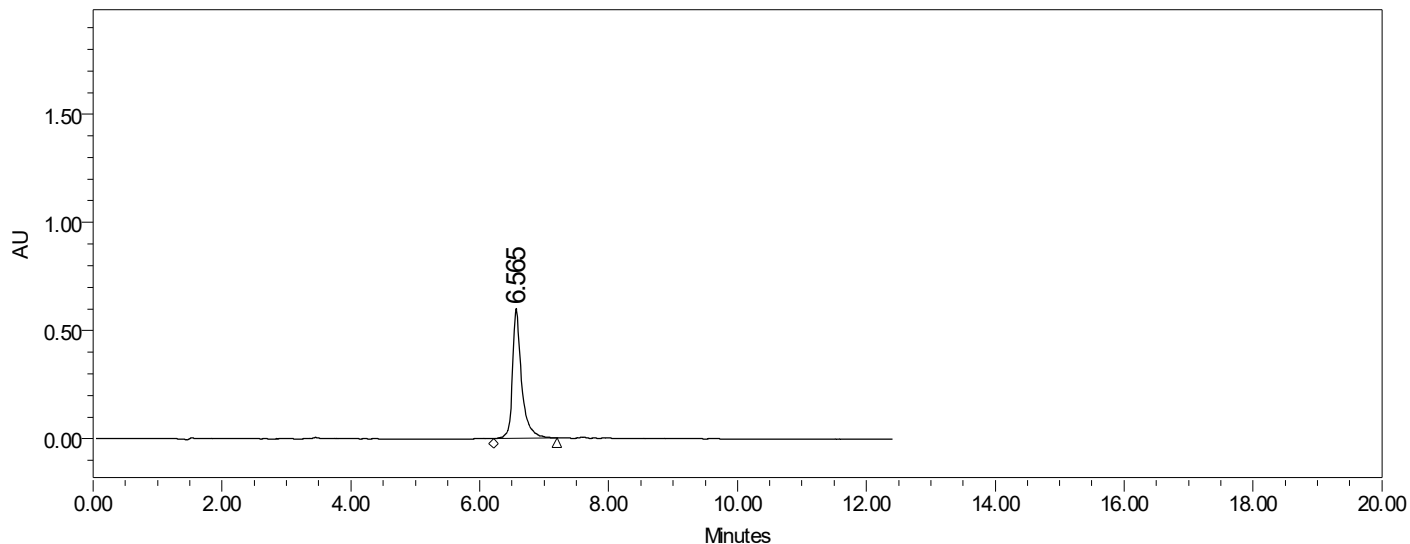

|   | RT    | Area    | % Area | Height |
|---|-------|---------|--------|--------|
| 1 | 6.565 | 5907342 | 100.00 | 597572 |

# Mass spec. of compound 7f

wn17 #217 RT: 3.65 P: + NL: 3.79E2  
T: {0,0} + c EI Full ms [40.00-1000.00]

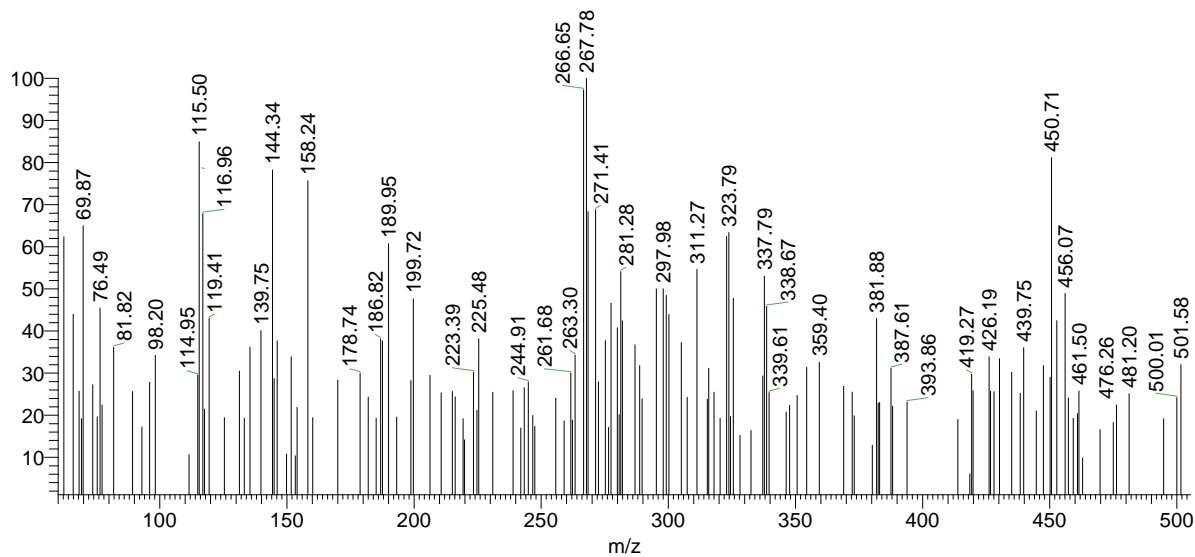

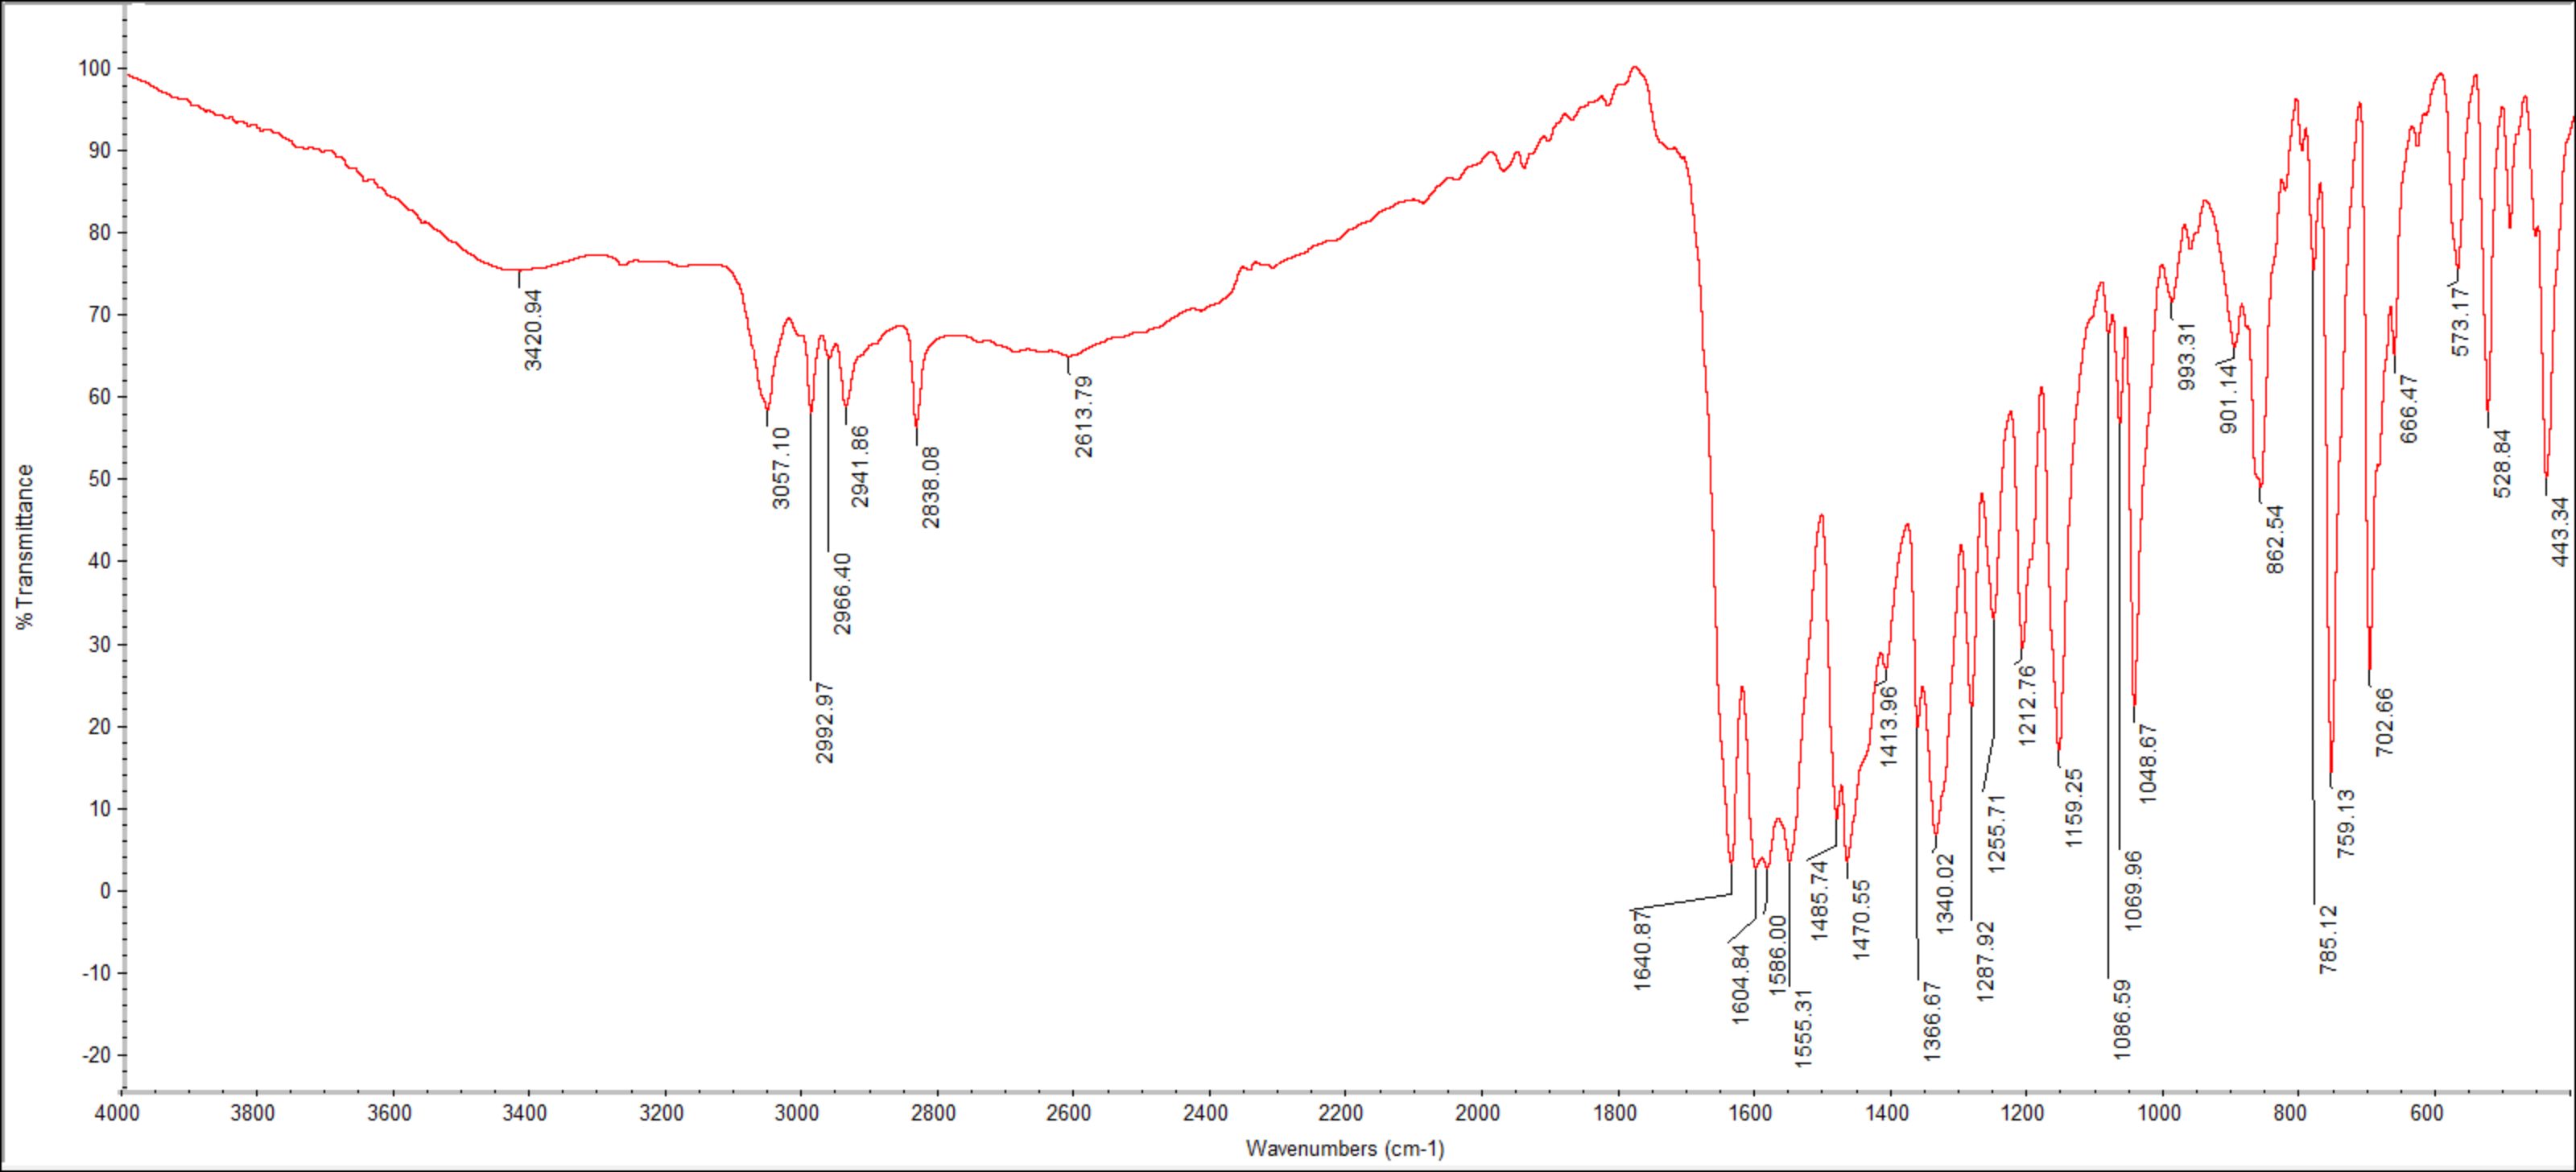



1H NMR of 7g

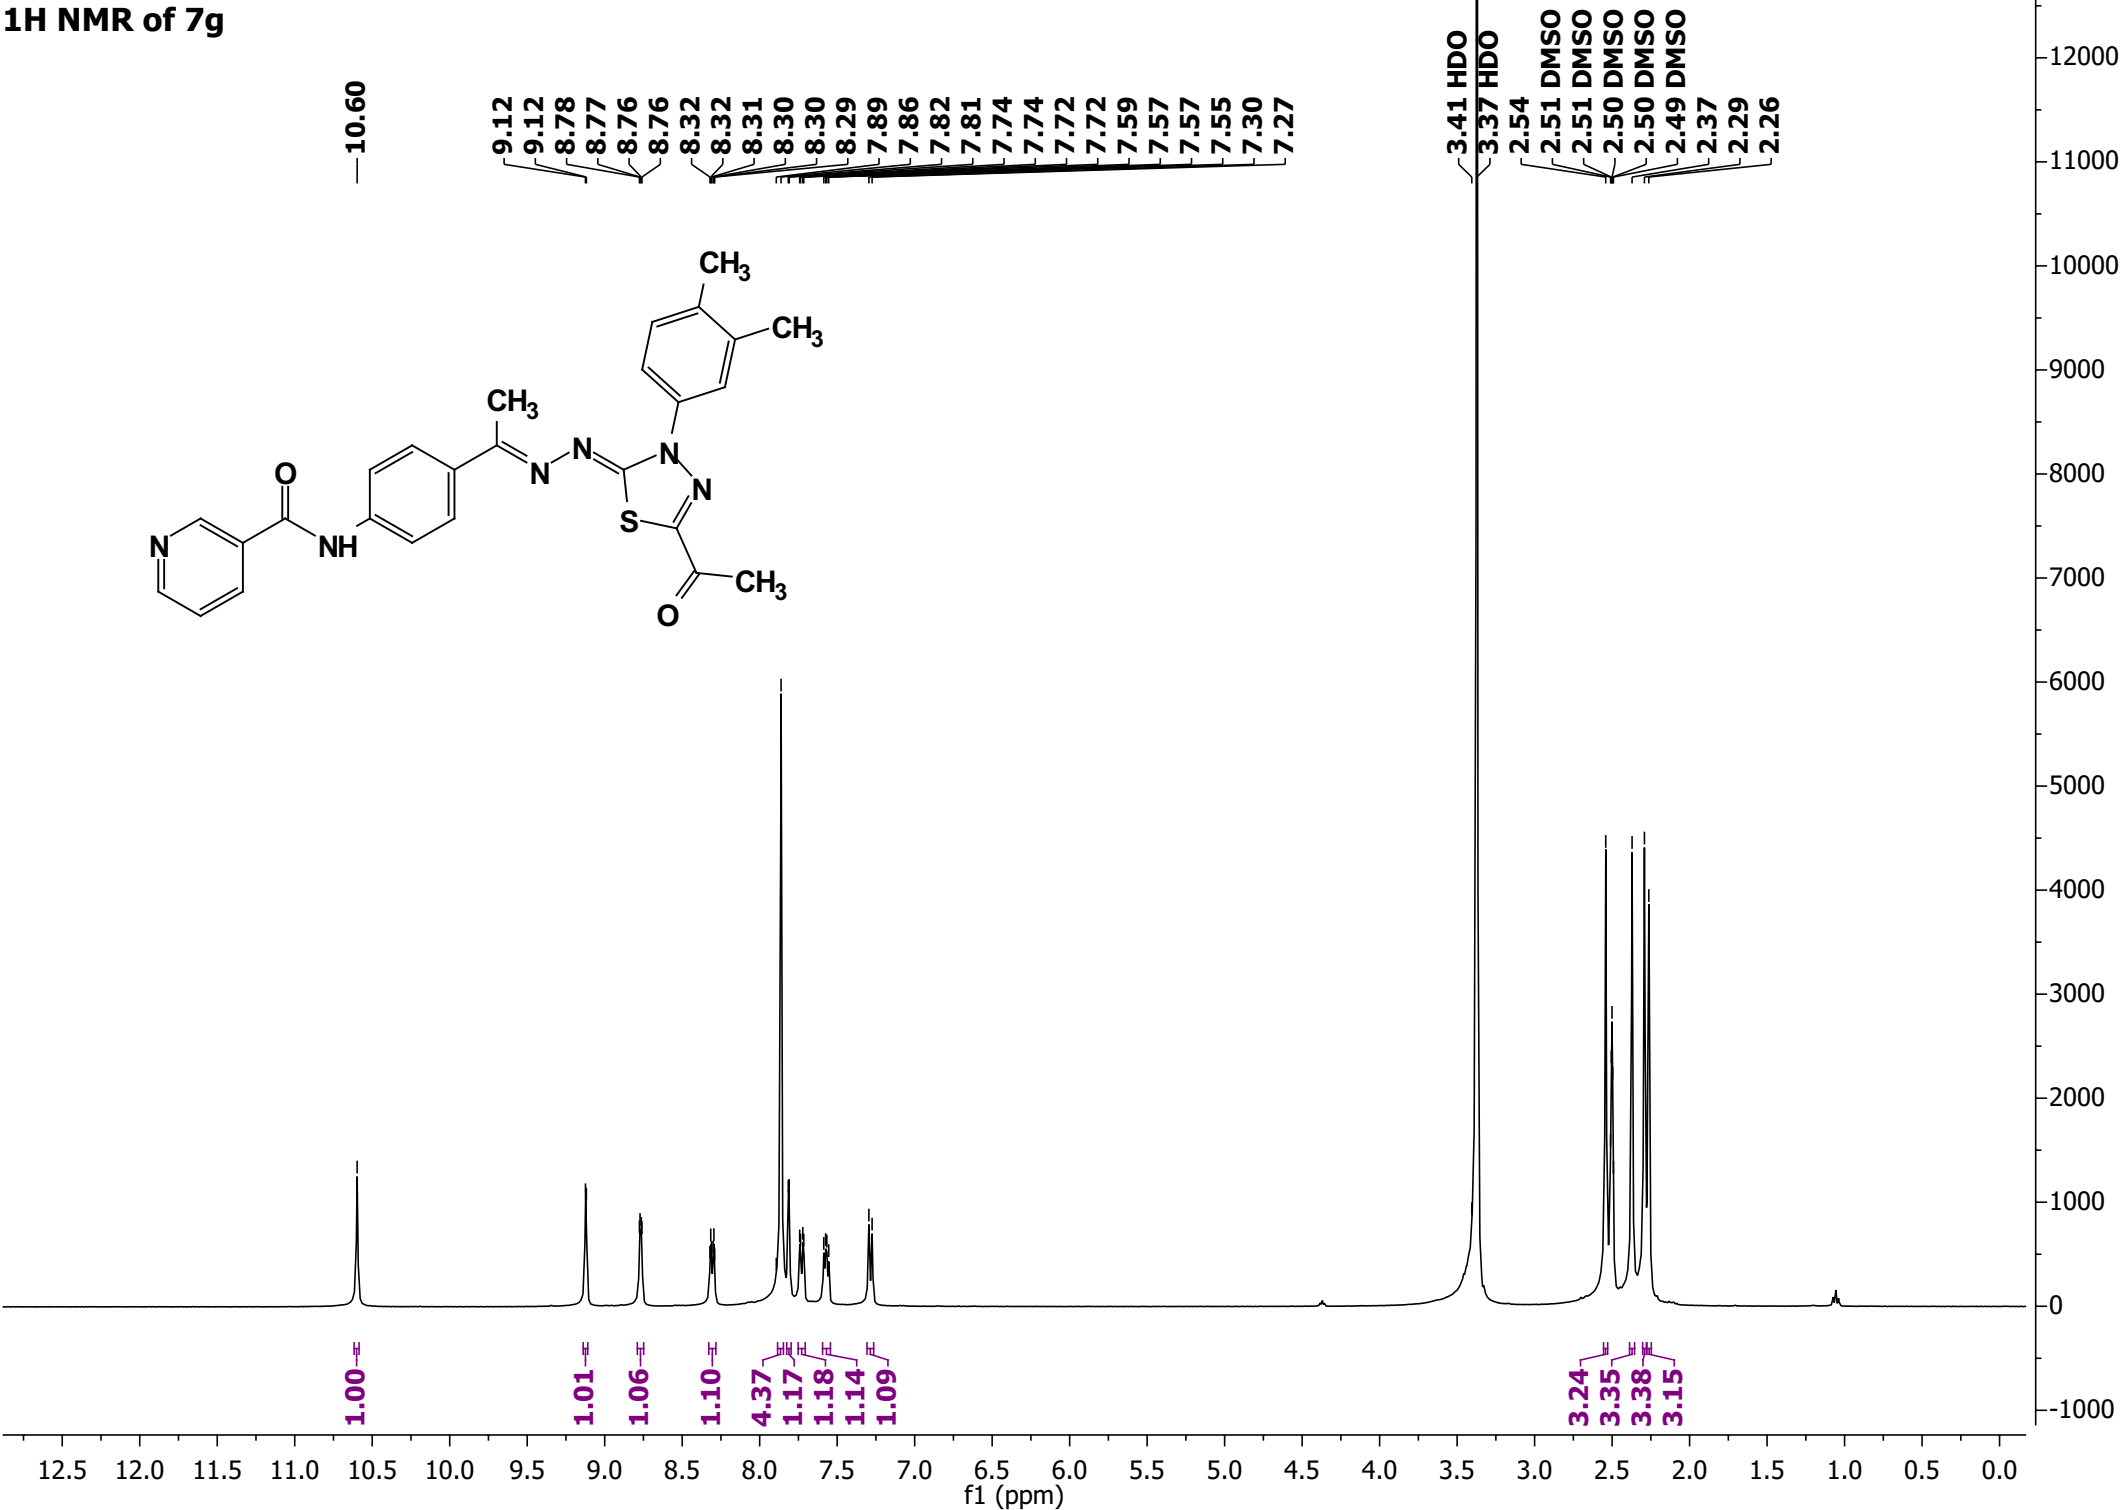

13C NMR of 7g

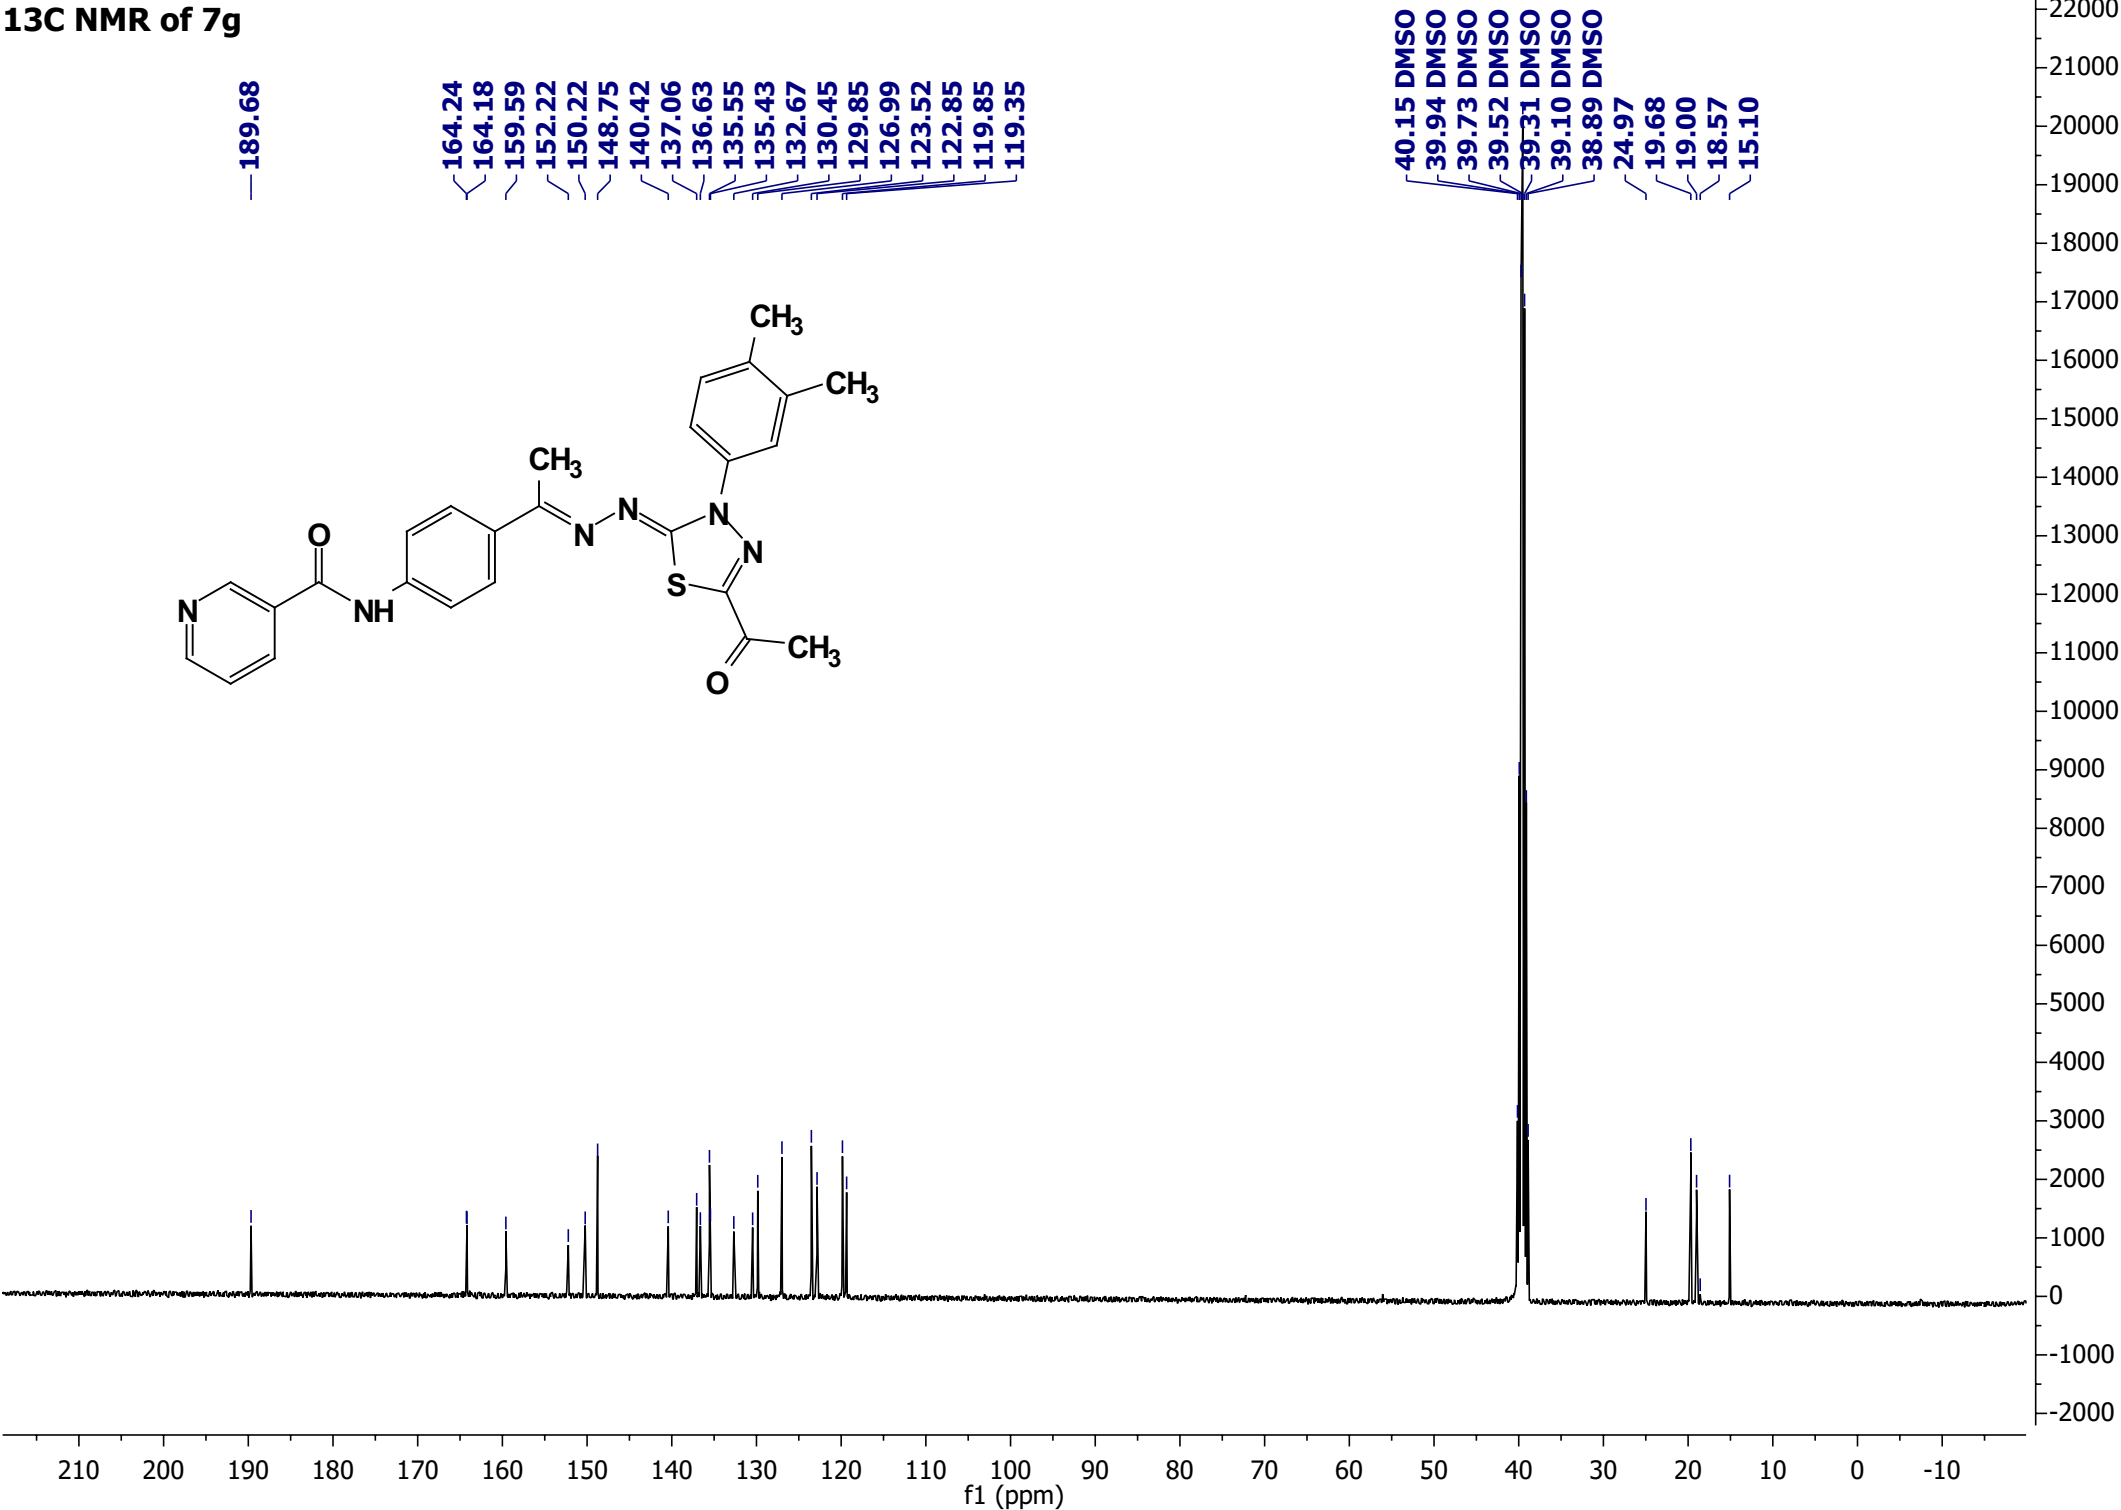

## SAMPLE INFORMATION

|                   |                            |                     |                                 |
|-------------------|----------------------------|---------------------|---------------------------------|
| Sample Name:      | WN-16                      | Acquired By:        | YARA                            |
| Sample Type:      | Unknown                    | Sample Set Name:    |                                 |
| Vial:             | 42                         | Acq. Method Set:    | Organic                         |
| Injection #:      | 1                          | Processing Method:  | Default                         |
| Injection Volume: | 4.00 ul                    | Channel Name:       | 335.0nm                         |
| Run Time:         | 20.0 Minutes               | Proc. Chnl. Descr.: | W2996 FDA 335.0 nm(FDA 190.0 to |
|                   |                            |                     |                                 |
| Date Acquired:    | 22/05/2024 06:15:07 PM EET |                     |                                 |
| Date Processed:   | 23/05/2024 11:51:48 AM EET |                     |                                 |

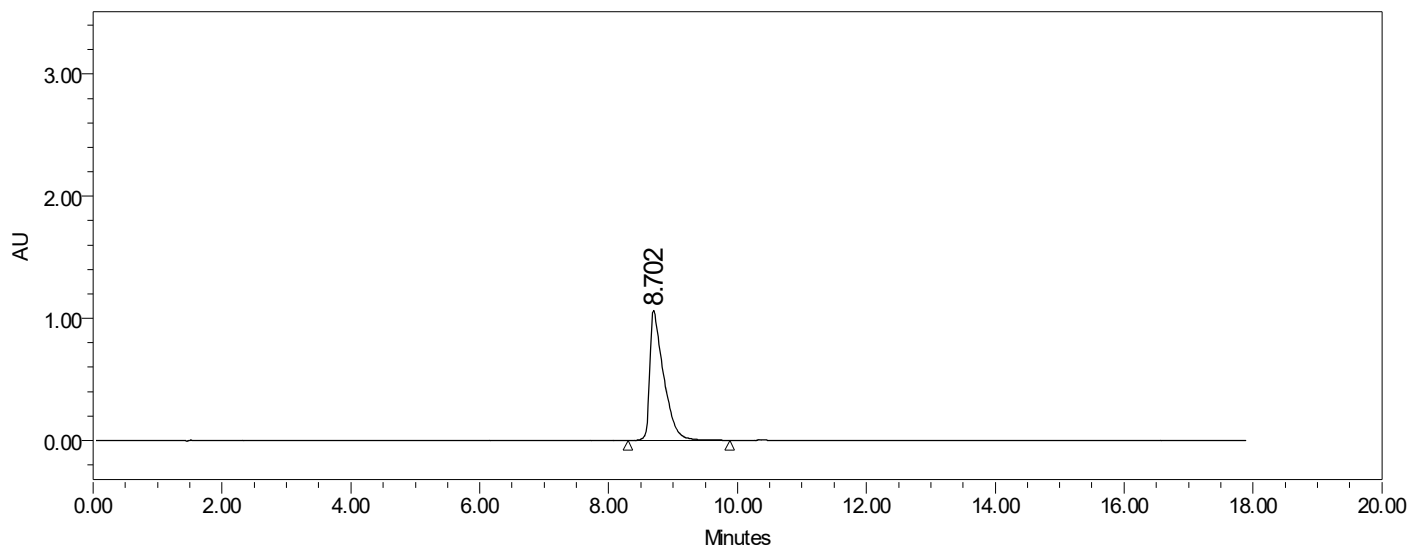

|   | RT    | Area     | % Area | Height  |
|---|-------|----------|--------|---------|
| 1 | 8.702 | 15883187 | 100.00 | 1063707 |

# Mass spec. of compound 7g

Hazem-Wn-16 #285 RT: 4.79 AV: 1 SB: 2 4.25 , 3.88 NL: 8.11E4  
T: {0,0} + c EI Full ms [40.00-1000.00]

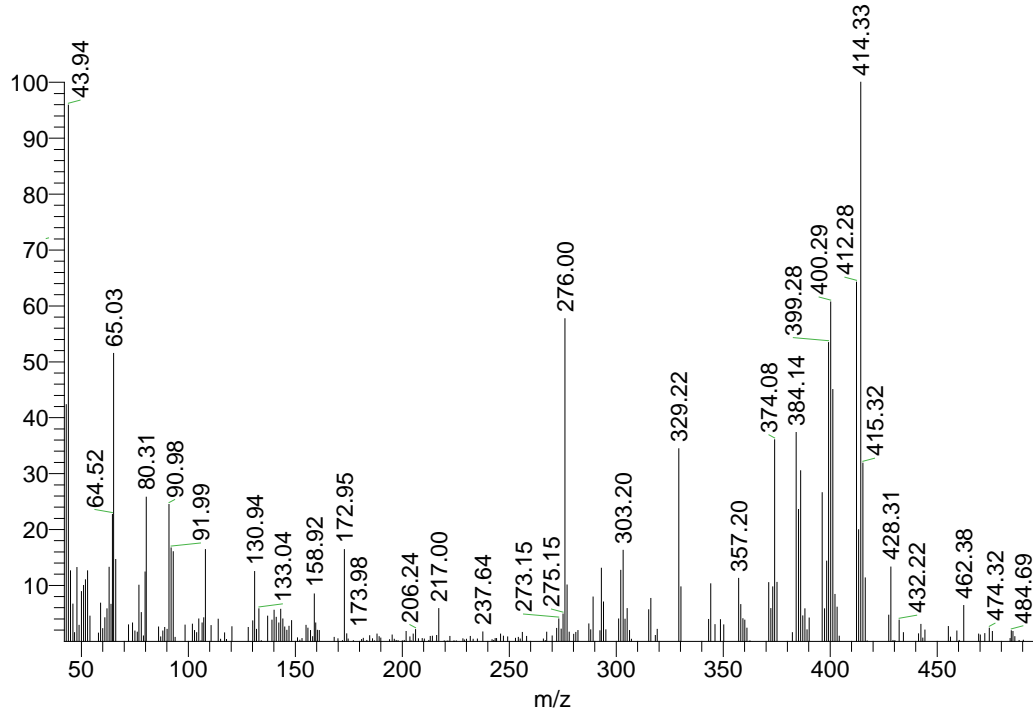

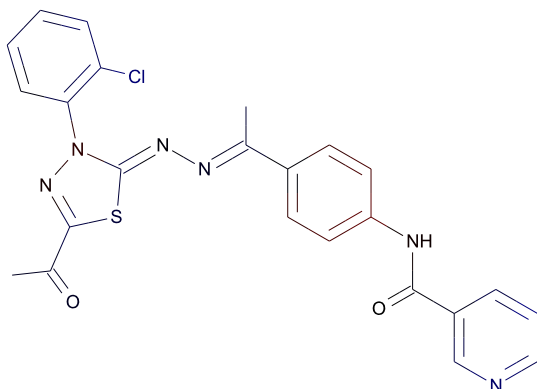

C<sub>24</sub>H<sub>19</sub>ClN<sub>6</sub>O<sub>2</sub>S

Molecular Weight: 490.96466

ALogP: 4.258

Rotatable Bonds: 6

Acceptors: 8

Donors: 1

## Model Prediction

Prediction: Non-Mutagen

Probability: 0.607

Enrichment: 1.09

Bayesian Score: -4.84

Mahalanobis Distance: 12.7

Mahalanobis Distance p-value: 2.47e-005

Prediction: Positive if the Bayesian score is above the estimated best cutoff value from minimizing the false positive and false negative rate.

Probability: The estimated probability that the sample is in the positive category. This assumes that the Bayesian score follows a normal distribution and is different from the prediction using a cutoff.

Enrichment: An estimate of enrichment, that is, the increased likelihood (versus random) of this sample being in the category.

Bayesian Score: The standard Laplacian-modified Bayesian score.

Mahalanobis Distance: The Mahalanobis distance (MD) is the distance to the center of the training data. The larger the MD, the less trustworthy the prediction.

Mahalanobis Distance p-value: The p-value gives the fraction of training data with an MD greater than or equal to the one for the given sample, assuming normally distributed data. The smaller the p-value, the less trustworthy the prediction. For highly non-normal X properties (e.g., fingerprints), the MD p-value is wildly inaccurate.

## Structural Similar Compounds

| Name               | 3567-69-9                                                                                            | 83621-06-1                                       | 1936-15-8                                                                                            |
|--------------------|------------------------------------------------------------------------------------------------------|--------------------------------------------------|------------------------------------------------------------------------------------------------------|
| Structure          |                                                                                                      |                                                  |                                                                                                      |
| Actual Endpoint    | Mutagen                                                                                              | Non-Mutagen                                      | Non-Mutagen                                                                                          |
| Predicted Endpoint | Non-Mutagen                                                                                          | Non-Mutagen                                      | Non-Mutagen                                                                                          |
| Distance           | 0.574                                                                                                | 0.608                                            | 0.612                                                                                                |
| Reference          | Helma, C., Cramer, T., Kramer, S., and De Raedt, L., J. Chem. Inf. Comput. Sci., 2004, pp. 1402-1411 | Kazius et. al., J. Med. Chem. (2005) 48, 312-320 | Helma, C., Cramer, T., Kramer, S., and De Raedt, L., J. Chem. Inf. Comput. Sci., 2004, pp. 1402-1411 |

## Model Applicability

Unknown features are fingerprint features in the query molecule, but not found or appearing too infrequently in the training set.

1. All properties and OPS components are within expected ranges.

## Feature Contribution

| Top features for positive contribution |            |                                                                    |       |                         |
|----------------------------------------|------------|--------------------------------------------------------------------|-------|-------------------------|
| Fingerprint                            | Bit/Smiles | Feature Structure                                                  | Score | Mutagen in training set |
| SCFP_12                                | 555539852  | <p>[*]:[cH]:[c](:[cH]:[*])C(=O)N[c]1:[cH]:[cH]:[*]:[cH]:[cH]:1</p> | 0.447 | 22 out of 24            |

|                                        |             |                                                                                                                                                              |        |                         |
|----------------------------------------|-------------|--------------------------------------------------------------------------------------------------------------------------------------------------------------|--------|-------------------------|
| SCFP_12                                | 818445224   | 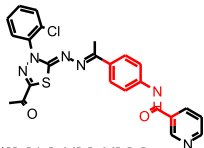<br><chem>[*][c]1:[cH]:[cH]:[c] (NC(=O)[c](:[*]):[*] ):[cH]:[cH]:1</chem> | 0.434  | 12 out of 13            |
| SCFP_12                                | 124026986   | <br><chem>[*]:[cH]:[c](:[cH]:[*] )C(=O)N[c](:[*]):[*] ]</chem>            | 0.429  | 33 out of 37            |
| Top Features for negative contribution |             |                                                                                                                                                              |        |                         |
| Fingerprint                            | Bit/Smiles  | Feature Structure                                                                                                                                            | Score  | Mutagen in training set |
| SCFP_12                                | -1630519606 | <br><chem>[*]C1=[*][*]C(=[*])S1</chem>                                    | -0.998 | 0 out of 3              |
| SCFP_12                                | 903335088   | <br><chem>[*]NC(=O)[c]1:[cH]:[c H]:[*]:n:[cH]:1</chem>                   | -0.762 | 0 out of 2              |
| SCFP_12                                | 1165971455  | <br><chem>[*]NC(=O)[c]1:[cH]:[c H]:[cH]:n:[cH]:1</chem>                 | -0.762 | 0 out of 2              |

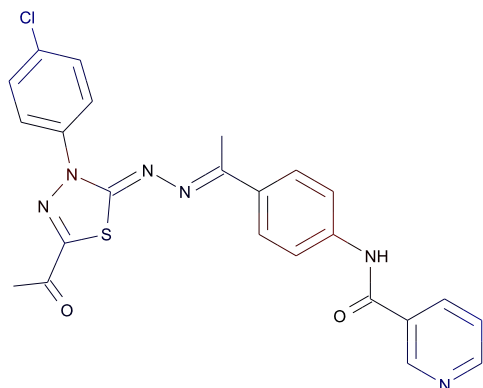

C<sub>24</sub>H<sub>19</sub>ClN<sub>6</sub>O<sub>2</sub>S

Molecular Weight: 490.96465

ALogP: 4.258

Rotatable Bonds: 6

Acceptors: 8

Donors: 1

## Model Prediction

Prediction: Non-Mutagen

Probability: 0.605

Enrichment: 1.08

Bayesian Score: -4.88

Mahalanobis Distance: 12.7

Mahalanobis Distance p-value: 2.47e-005

Prediction: Positive if the Bayesian score is above the estimated best cutoff value from minimizing the false positive and false negative rate.

Probability: The estimated probability that the sample is in the positive category. This assumes that the Bayesian score follows a normal distribution and is different from the prediction using a cutoff.

Enrichment: An estimate of enrichment, that is, the increased likelihood (versus random) of this sample being in the category.

Bayesian Score: The standard Laplacian-modified Bayesian score.

Mahalanobis Distance: The Mahalanobis distance (MD) is the distance to the center of the training data. The larger the MD, the less trustworthy the prediction.

Mahalanobis Distance p-value: The p-value gives the fraction of training data with an MD greater than or equal to the one for the given sample, assuming normally distributed data. The smaller the p-value, the less trustworthy the prediction. For highly non-normal X properties (e.g., fingerprints), the MD p-value is wildly inaccurate.

## Structural Similar Compounds

| Name               | 3567-69-9                                                                                            | 83621-06-1                                       | 1936-15-8                                                                                            |
|--------------------|------------------------------------------------------------------------------------------------------|--------------------------------------------------|------------------------------------------------------------------------------------------------------|
| Structure          |                                                                                                      |                                                  |                                                                                                      |
| Actual Endpoint    | Mutagen                                                                                              | Non-Mutagen                                      | Non-Mutagen                                                                                          |
| Predicted Endpoint | Non-Mutagen                                                                                          | Non-Mutagen                                      | Non-Mutagen                                                                                          |
| Distance           | 0.577                                                                                                | 0.603                                            | 0.615                                                                                                |
| Reference          | Helma, C., Cramer, T., Kramer, S., and De Raedt, L., J. Chem. Inf. Comput. Sci., 2004, pp. 1402-1411 | Kazius et. al., J. Med. Chem. (2005) 48, 312-320 | Helma, C., Cramer, T., Kramer, S., and De Raedt, L., J. Chem. Inf. Comput. Sci., 2004, pp. 1402-1411 |

## Model Applicability

Unknown features are fingerprint features in the query molecule, but not found or appearing too infrequently in the training set.

1. All properties and OPS components are within expected ranges.

## Feature Contribution

| Top features for positive contribution |            |                                                                    |       |                         |
|----------------------------------------|------------|--------------------------------------------------------------------|-------|-------------------------|
| Fingerprint                            | Bit/Smiles | Feature Structure                                                  | Score | Mutagen in training set |
| SCFP_12                                | 555539852  | <p>[*]:[cH]:[c](:[cH]:[*])C(=O)N[c]1:[cH]:[cH]:[*]:[cH]:[cH]:1</p> | 0.447 | 22 out of 24            |

|                                        |             |                                                                                                                                                              |        |                         |
|----------------------------------------|-------------|--------------------------------------------------------------------------------------------------------------------------------------------------------------|--------|-------------------------|
| SCFP_12                                | 818445224   | 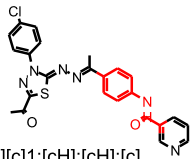<br><chem>[*][c]1:[cH]:[cH]:[c] (NC(=O)[c](:[*]):[*] ):[cH]:[cH]:1</chem> | 0.434  | 12 out of 13            |
| SCFP_12                                | 124026986   | <br><chem>[*]:[cH]:[c](:[cH]:[*] )C(=O)N[c](:[*]):[*] ]</chem>            | 0.429  | 33 out of 37            |
| Top Features for negative contribution |             |                                                                                                                                                              |        |                         |
| Fingerprint                            | Bit/Smiles  | Feature Structure                                                                                                                                            | Score  | Mutagen in training set |
| SCFP_12                                | -1630519606 | <br><chem>[*]C1=[*][*]C(=[*])S1</chem>                                    | -0.998 | 0 out of 3              |
| SCFP_12                                | -331724199  | <br><chem>[*]N=C(/C)[c](:[*]) :[*]</chem>                                | -0.762 | 0 out of 2              |
| SCFP_12                                | 1165971455  | <br><chem>[*]NC(=O)[c]1:[cH]:[c H]:[cH]:n:[cH]:1</chem>                 | -0.762 | 0 out of 2              |



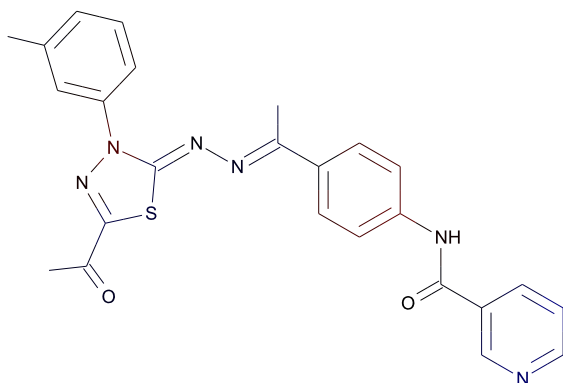

$C_{25}H_{22}N_6O_2S$

Molecular Weight: 470.54617

ALogP: 4.08

Rotatable Bonds: 6

Acceptors: 8

Donors: 1

## Model Prediction

Prediction: Non-Mutagen

Probability: 0.674

Enrichment: 1.21

Bayesian Score: -2.75

Mahalanobis Distance: 12.4

Mahalanobis Distance p-value: 9.97e-005

Prediction: Positive if the Bayesian score is above the estimated best cutoff value from minimizing the false positive and false negative rate.

Probability: The estimated probability that the sample is in the positive category. This assumes that the Bayesian score follows a normal distribution and is different from the prediction using a cutoff.

Enrichment: An estimate of enrichment, that is, the increased likelihood (versus random) of this sample being in the category.

Bayesian Score: The standard Laplacian-modified Bayesian score.

Mahalanobis Distance: The Mahalanobis distance (MD) is the distance to the center of the training data. The larger the MD, the less trustworthy the prediction.

Mahalanobis Distance p-value: The p-value gives the fraction of training data with an MD greater than or equal to the one for the given sample, assuming normally distributed data. The smaller the p-value, the less trustworthy the prediction. For highly non-normal X properties (e.g., fingerprints), the MD p-value is wildly inaccurate.

## Structural Similar Compounds

| Name               | 3567-69-9                                                                                            | 1936-15-8                                                                                            | 2783-94-0                                                                                            |
|--------------------|------------------------------------------------------------------------------------------------------|------------------------------------------------------------------------------------------------------|------------------------------------------------------------------------------------------------------|
| Structure          |                                                                                                      |                                                                                                      |                                                                                                      |
| Actual Endpoint    | Mutagen                                                                                              | Non-Mutagen                                                                                          | Non-Mutagen                                                                                          |
| Predicted Endpoint | Non-Mutagen                                                                                          | Non-Mutagen                                                                                          | Non-Mutagen                                                                                          |
| Distance           | 0.590                                                                                                | 0.598                                                                                                | 0.600                                                                                                |
| Reference          | Helma, C., Cramer, T., Kramer, S., and De Raedt, L., J. Chem. Inf. Comput. Sci., 2004, pp. 1402-1411 | Helma, C., Cramer, T., Kramer, S., and De Raedt, L., J. Chem. Inf. Comput. Sci., 2004, pp. 1402-1411 | Helma, C., Cramer, T., Kramer, S., and De Raedt, L., J. Chem. Inf. Comput. Sci., 2004, pp. 1402-1411 |

## Model Applicability

Unknown features are fingerprint features in the query molecule, but not found or appearing too infrequently in the training set.

1. All properties and OPS components are within expected ranges.

## Feature Contribution

| Top features for positive contribution |            |                                                                    |       |                         |
|----------------------------------------|------------|--------------------------------------------------------------------|-------|-------------------------|
| Fingerprint                            | Bit/Smiles | Feature Structure                                                  | Score | Mutagen in training set |
| SCFP_12                                | 555539852  | <p>[*]:[cH]:[c](:[cH]:[*])C(=O)N[c]1:[cH]:[cH]:[*]:[cH]:[cH]:1</p> | 0.447 | 22 out of 24            |

|                                        |             |                                                                                                                                                           |        |                         |
|----------------------------------------|-------------|-----------------------------------------------------------------------------------------------------------------------------------------------------------|--------|-------------------------|
| SCFP_12                                | 818445224   | 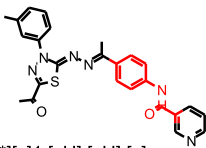<br><chem>[*][c]1:[cH]:[cH]:[c](NC(=O)[c](:[*]):[*])[cH]:[cH]:1</chem> | 0.434  | 12 out of 13            |
| SCFP_12                                | 2096901122  | <br><chem>[*]:[cH]:[c](NC(=O)[c](:[*]):[*])[cH]:[*]</chem>             | 0.429  | 33 out of 37            |
| Top Features for negative contribution |             |                                                                                                                                                           |        |                         |
| Fingerprint                            | Bit/Smiles  | Feature Structure                                                                                                                                         | Score  | Mutagen in training set |
| SCFP_12                                | -1630519606 | <br><chem>[*]C1=[*][*]C(=[*])S1</chem>                                 | -0.998 | 0 out of 3              |
| SCFP_12                                | 1165971455  | <br><chem>[*]NC(=O)[c]1:[cH]:[cH]:[cH]:[cH]:n:[cH]:1</chem>           | -0.762 | 0 out of 2              |
| SCFP_12                                | 903335088   | <br><chem>[*]NC(=O)[c]1:[cH]:[cH]:[cH]:[cH]:n:[cH]:1</chem>          | -0.762 | 0 out of 2              |

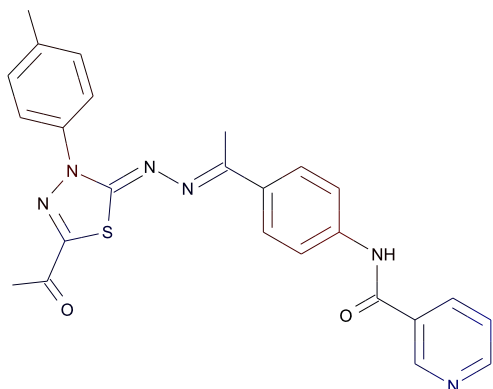

$C_{25}H_{22}N_6O_2S$

Molecular Weight: 470.54617

ALogP: 4.08

Rotatable Bonds: 6

Acceptors: 8

Donors: 1

## Model Prediction

Prediction: Non-Mutagen

Probability: 0.685

Enrichment: 1.23

Bayesian Score: -2.35

Mahalanobis Distance: 12.4

Mahalanobis Distance p-value: 9.97e-005

Prediction: Positive if the Bayesian score is above the estimated best cutoff value from minimizing the false positive and false negative rate.

Probability: The estimated probability that the sample is in the positive category. This assumes that the Bayesian score follows a normal distribution and is different from the prediction using a cutoff.

Enrichment: An estimate of enrichment, that is, the increased likelihood (versus random) of this sample being in the category.

Bayesian Score: The standard Laplacian-modified Bayesian score.

Mahalanobis Distance: The Mahalanobis distance (MD) is the distance to the center of the training data. The larger the MD, the less trustworthy the prediction.

Mahalanobis Distance p-value: The p-value gives the fraction of training data with an MD greater than or equal to the one for the given sample, assuming normally distributed data. The smaller the p-value, the less trustworthy the prediction. For highly non-normal X properties (e.g., fingerprints), the MD p-value is wildly inaccurate.

## Structural Similar Compounds

| Name               | 3567-69-9                                                                                            | 1936-15-8                                                                                            | 2783-94-0                                                                                            |
|--------------------|------------------------------------------------------------------------------------------------------|------------------------------------------------------------------------------------------------------|------------------------------------------------------------------------------------------------------|
| Structure          |                                                                                                      |                                                                                                      |                                                                                                      |
| Actual Endpoint    | Mutagen                                                                                              | Non-Mutagen                                                                                          | Non-Mutagen                                                                                          |
| Predicted Endpoint | Non-Mutagen                                                                                          | Non-Mutagen                                                                                          | Non-Mutagen                                                                                          |
| Distance           | 0.593                                                                                                | 0.600                                                                                                | 0.600                                                                                                |
| Reference          | Helma, C., Cramer, T., Kramer, S., and De Raedt, L., J. Chem. Inf. Comput. Sci., 2004, pp. 1402-1411 | Helma, C., Cramer, T., Kramer, S., and De Raedt, L., J. Chem. Inf. Comput. Sci., 2004, pp. 1402-1411 | Helma, C., Cramer, T., Kramer, S., and De Raedt, L., J. Chem. Inf. Comput. Sci., 2004, pp. 1402-1411 |

## Model Applicability

Unknown features are fingerprint features in the query molecule, but not found or appearing too infrequently in the training set.

1. All properties and OPS components are within expected ranges.

## Feature Contribution

| Top features for positive contribution |            |                                                                             |       |                         |
|----------------------------------------|------------|-----------------------------------------------------------------------------|-------|-------------------------|
| Fingerprint                            | Bit/Smiles | Feature Structure                                                           | Score | Mutagen in training set |
| SCFP_12                                | 555539852  | <br><chem>[*]:[cH]:[c]([cH]:[*])C(=O)N[c]1:[cH]:[cH]:[*]:[cH]:[cH]:1</chem> | 0.447 | 22 out of 24            |

|                                        |             |                                                                                                                                                           |        |                         |
|----------------------------------------|-------------|-----------------------------------------------------------------------------------------------------------------------------------------------------------|--------|-------------------------|
| SCFP_12                                | 818445224   | 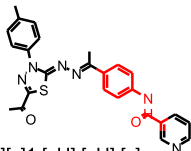<br><chem>[*][c]1:[cH]:[cH]:[c](NC(=O)[c](:[*]):[*])[cH]:[cH]:1</chem> | 0.434  | 12 out of 13            |
| SCFP_12                                | 2096901122  | <br><chem>[*]:[cH]:[c](NC(=O)[c](:[*]):[*])[cH]:[*]</chem>             | 0.429  | 33 out of 37            |
| Top Features for negative contribution |             |                                                                                                                                                           |        |                         |
| Fingerprint                            | Bit/Smiles  | Feature Structure                                                                                                                                         | Score  | Mutagen in training set |
| SCFP_12                                | -1630519606 | <br><chem>[*]C1=[*][*]C(=[*])S1</chem>                                 | -0.998 | 0 out of 3              |
| SCFP_12                                | 1165971455  | <br><chem>[*]NC(=O)[c]1:[cH]:[cH]:[cH]:[cH]:n:[cH]:1</chem>           | -0.762 | 0 out of 2              |
| SCFP_12                                | 903335088   | <br><chem>[*]NC(=O)[c]1:[cH]:[cH]:[cH]:[cH]:n:[cH]:1</chem>          | -0.762 | 0 out of 2              |

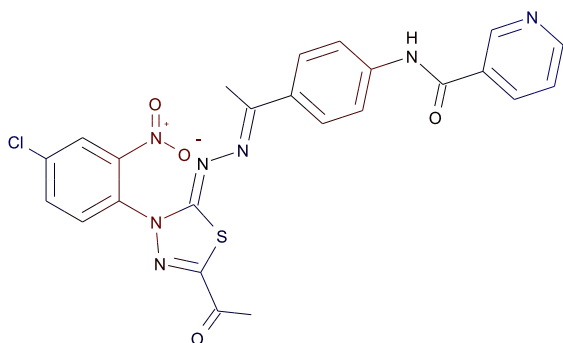

$C_{24}H_{18}ClN_7O_4S$

Molecular Weight: 535.96222

ALogP: 4.153

Rotatable Bonds: 7

Acceptors: 10

Donors: 1

## Model Prediction

Prediction: Non-Mutagen

Probability: 0.688

Enrichment: 1.23

Bayesian Score: -2.21

Mahalanobis Distance: 12.9

Mahalanobis Distance p-value: 8.03e-006

Prediction: Positive if the Bayesian score is above the estimated best cutoff value from minimizing the false positive and false negative rate.

Probability: The estimated probability that the sample is in the positive category. This assumes that the Bayesian score follows a normal distribution and is different from the prediction using a cutoff.

Enrichment: An estimate of enrichment, that is, the increased likelihood (versus random) of this sample being in the category.

Bayesian Score: The standard Laplacian-modified Bayesian score.

Mahalanobis Distance: The Mahalanobis distance (MD) is the distance to the center of the training data. The larger the MD, the less trustworthy the prediction.

Mahalanobis Distance p-value: The p-value gives the fraction of training data with an MD greater than or equal to the one for the given sample, assuming normally distributed data. The smaller the p-value, the less trustworthy the prediction. For highly non-normal X properties (e.g., fingerprints), the MD p-value is wildly inaccurate.

## Structural Similar Compounds

| Name               | 3567-69-9                                                                                            | 6471-49-4                                        | 1936-15-8                                                                                            |
|--------------------|------------------------------------------------------------------------------------------------------|--------------------------------------------------|------------------------------------------------------------------------------------------------------|
| Structure          |                                                                                                      |                                                  |                                                                                                      |
| Actual Endpoint    | Mutagen                                                                                              | Mutagen                                          | Non-Mutagen                                                                                          |
| Predicted Endpoint | Non-Mutagen                                                                                          | Mutagen                                          | Non-Mutagen                                                                                          |
| Distance           | 0.599                                                                                                | 0.632                                            | 0.636                                                                                                |
| Reference          | Helma, C., Cramer, T., Kramer, S., and De Raedt, L., J. Chem. Inf. Comput. Sci., 2004, pp. 1402-1411 | Kazius et. al., J. Med. Chem. (2005) 48, 312-320 | Helma, C., Cramer, T., Kramer, S., and De Raedt, L., J. Chem. Inf. Comput. Sci., 2004, pp. 1402-1411 |

## Model Applicability

Unknown features are fingerprint features in the query molecule, but not found or appearing too infrequently in the training set.

1. All properties and OPS components are within expected ranges.

## Feature Contribution

| Top features for positive contribution |            |                                                                    |       |                         |
|----------------------------------------|------------|--------------------------------------------------------------------|-------|-------------------------|
| Fingerprint                            | Bit/Smiles | Feature Structure                                                  | Score | Mutagen in training set |
| SCFP_12                                | -990000384 | <br>[*]N([*])[c]1:[cH]:[*]<br>:[c]([*]):[cH]:[c]:<br>1[N+](=O)[O-] | 0.507 | 50 out of 52            |

|                                        |             |                                                                                                                                                                       |        |                         |
|----------------------------------------|-------------|-----------------------------------------------------------------------------------------------------------------------------------------------------------------------|--------|-------------------------|
| SCFP_12                                | 555539852   | 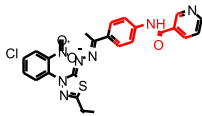<br><chem>[*]:[cH]:[c](:[cH]):[*]<br/>)C(=O)N[c]1:[cH]:[cH]:[*]:[cH]:[cH]:1</chem> | 0.447  | 22 out of 24            |
| SCFP_12                                | 818445224   | <br><chem>[*][c]1:[cH]:[cH]:[c]<br/>(NC(=O)[c](:[*]):[*]<br/>):[cH]:[cH]:1</chem>  | 0.434  | 12 out of 13            |
| Top Features for negative contribution |             |                                                                                                                                                                       |        |                         |
| Fingerprint                            | Bit/Smiles  | Feature Structure                                                                                                                                                     | Score  | Mutagen in training set |
| SCFP_12                                | -1630519606 | <br><chem>[*]C1=[*][*]C(=[*])S1</chem>                                             | -0.998 | 0 out of 3              |
| SCFP_12                                | 1165971455  | <br><chem>[*]NC(=O)[c]1:[cH]:[cH]:[cH]:[cH]:n:[cH]:1</chem>                      | -0.762 | 0 out of 2              |
| SCFP_12                                | -331724199  | <br><chem>[*]N=C(/C)[c]([c](:[*])<br/>):[*]</chem>                               | -0.762 | 0 out of 2              |

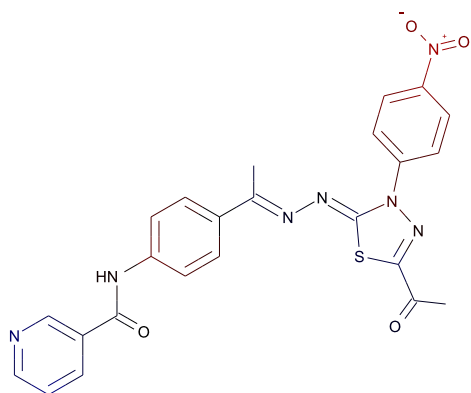

$C_{24}H_{19}N_7O_4S$

Molecular Weight: 501.51715

ALogP: 3.488

Rotatable Bonds: 7

Acceptors: 10

Donors: 1

## Model Prediction

Prediction: Mutagen

Probability: 0.744

Enrichment: 1.33

Bayesian Score: 0.275

Mahalanobis Distance: 12.5

Mahalanobis Distance p-value: 5.91e-005

Prediction: Positive if the Bayesian score is above the estimated best cutoff value from minimizing the false positive and false negative rate.

Probability: The estimated probability that the sample is in the positive category. This assumes that the Bayesian score follows a normal distribution and is different from the prediction using a cutoff.

Enrichment: An estimate of enrichment, that is, the increased likelihood (versus random) of this sample being in the category.

Bayesian Score: The standard Laplacian-modified Bayesian score.

Mahalanobis Distance: The Mahalanobis distance (MD) is the distance to the center of the training data. The larger the MD, the less trustworthy the prediction.

Mahalanobis Distance p-value: The p-value gives the fraction of training data with an MD greater than or equal to the one for the given sample, assuming normally distributed data. The smaller the p-value, the less trustworthy the prediction. For highly non-normal X properties (e.g., fingerprints), the MD p-value is wildly inaccurate.

## Structural Similar Compounds

| Name               | 1936-15-8                                                                                            | 2783-94-0                                                                                            | 3567-69-9                                                                                            |
|--------------------|------------------------------------------------------------------------------------------------------|------------------------------------------------------------------------------------------------------|------------------------------------------------------------------------------------------------------|
| Structure          |                                                                                                      |                                                                                                      |                                                                                                      |
| Actual Endpoint    | Non-Mutagen                                                                                          | Non-Mutagen                                                                                          | Mutagen                                                                                              |
| Predicted Endpoint | Non-Mutagen                                                                                          | Non-Mutagen                                                                                          | Non-Mutagen                                                                                          |
| Distance           | 0.599                                                                                                | 0.599                                                                                                | 0.632                                                                                                |
| Reference          | Helma, C., Cramer, T., Kramer, S., and De Raedt, L., J. Chem. Inf. Comput. Sci., 2004, pp. 1402-1411 | Helma, C., Cramer, T., Kramer, S., and De Raedt, L., J. Chem. Inf. Comput. Sci., 2004, pp. 1402-1411 | Helma, C., Cramer, T., Kramer, S., and De Raedt, L., J. Chem. Inf. Comput. Sci., 2004, pp. 1402-1411 |

## Model Applicability

Unknown features are fingerprint features in the query molecule, but not found or appearing too infrequently in the training set.

1. All properties and OPS components are within expected ranges.

## Feature Contribution

| Top features for positive contribution |             |                                                                   |       |                         |
|----------------------------------------|-------------|-------------------------------------------------------------------|-------|-------------------------|
| Fingerprint                            | Bit/Smiles  | Feature Structure                                                 | Score | Mutagen in training set |
| SCFP_12                                | -1729573318 | <br>[*]N([*])[c]1:[cH]:[cH]:[cH]:[cH]:[cH]:[cH]:1<br>[N+](=O)[O-] | 0.488 | 36 out of 38            |

|                                        |             |                                                                                                                                                                 |        |                         |
|----------------------------------------|-------------|-----------------------------------------------------------------------------------------------------------------------------------------------------------------|--------|-------------------------|
| SCFP_12                                | 555539852   | 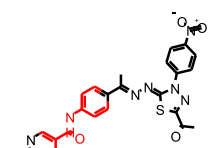<br><chem>[*].[cH]:[c](-[cH]:[*])C(=O)N[c]1:[cH]:[cH]:[*]:[cH]:[cH]:1</chem> | 0.447  | 22 out of 24            |
| SCFP_12                                | 818445224   | <br><chem>[*][c]1:[cH]:[cH]:[c](NC(=O)[c](-[*]):[*]):[cH]:[cH]:1</chem>      | 0.434  | 12 out of 13            |
| Top Features for negative contribution |             |                                                                                                                                                                 |        |                         |
| Fingerprint                            | Bit/Smiles  | Feature Structure                                                                                                                                               | Score  | Mutagen in training set |
| SCFP_12                                | -1630519606 | <br><chem>[*]C1=[*][*]C(=[*])S1</chem>                                       | -0.998 | 0 out of 3              |
| SCFP_12                                | 903335088   | <br><chem>[*]NC(=O)[c]1:[cH]:[cH]:[*]:n:[cH]:1</chem>                       | -0.762 | 0 out of 2              |
| SCFP_12                                | -331724199  | <br><chem>[*]N=C(/C)[c](-[*]):[*]</chem>                                   | -0.762 | 0 out of 2              |



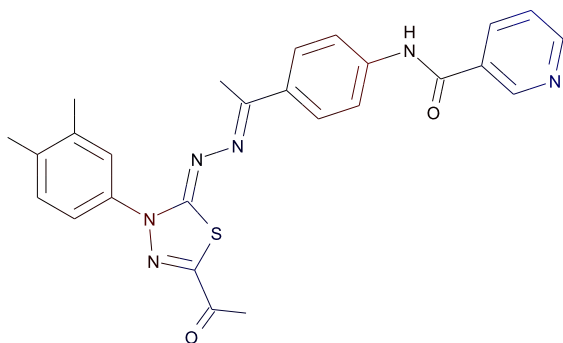

$C_{26}H_{24}N_6O_2S$

Molecular Weight: 484.57275

ALogP: 4.566

Rotatable Bonds: 6

Acceptors: 8

Donors: 1

## Model Prediction

Prediction: Non-Mutagen

Probability: 0.683

Enrichment: 1.22

Bayesian Score: -2.42

Mahalanobis Distance: 12.4

Mahalanobis Distance p-value: 9.65e-005

Prediction: Positive if the Bayesian score is above the estimated best cutoff value from minimizing the false positive and false negative rate.

Probability: The estimated probability that the sample is in the positive category. This assumes that the Bayesian score follows a normal distribution and is different from the prediction using a cutoff.

Enrichment: An estimate of enrichment, that is, the increased likelihood (versus random) of this sample being in the category.

Bayesian Score: The standard Laplacian-modified Bayesian score.

Mahalanobis Distance: The Mahalanobis distance (MD) is the distance to the center of the training data. The larger the MD, the less trustworthy the prediction.

Mahalanobis Distance p-value: The p-value gives the fraction of training data with an MD greater than or equal to the one for the given sample, assuming normally distributed data. The smaller the p-value, the less trustworthy the prediction. For highly non-normal X properties (e.g., fingerprints), the MD p-value is wildly inaccurate.

## Structural Similar Compounds

| Name               | 3567-69-9                                                                                            | 110004-69-8                                      | 83621-06-1                                       |
|--------------------|------------------------------------------------------------------------------------------------------|--------------------------------------------------|--------------------------------------------------|
| Structure          |                                                                                                      |                                                  |                                                  |
| Actual Endpoint    | Mutagen                                                                                              | Mutagen                                          | Non-Mutagen                                      |
| Predicted Endpoint | Non-Mutagen                                                                                          | Mutagen                                          | Non-Mutagen                                      |
| Distance           | 0.581                                                                                                | 0.621                                            | 0.622                                            |
| Reference          | Helma, C., Cramer, T., Kramer, S., and De Raedt, L., J. Chem. Inf. Comput. Sci., 2004, pp. 1402-1411 | Kazius et. al., J. Med. Chem. (2005) 48, 312-320 | Kazius et. al., J. Med. Chem. (2005) 48, 312-320 |

## Model Applicability

Unknown features are fingerprint features in the query molecule, but not found or appearing too infrequently in the training set.

1. All properties and OPS components are within expected ranges.

## Feature Contribution

| Top features for positive contribution |            |                                                                          |       |                         |
|----------------------------------------|------------|--------------------------------------------------------------------------|-------|-------------------------|
| Fingerprint                            | Bit/Smiles | Feature Structure                                                        | Score | Mutagen in training set |
| SCFP_12                                | 555539852  | <p>[*]:[cH]:[c](:[cH]:[*]<br/>])C(=O)N[c]1:[cH]:[cH]:[*]:[cH]:[cH]:1</p> | 0.447 | 22 out of 24            |

|                                        |             |                                                                                                                                                           |        |                         |
|----------------------------------------|-------------|-----------------------------------------------------------------------------------------------------------------------------------------------------------|--------|-------------------------|
| SCFP_12                                | 818445224   | 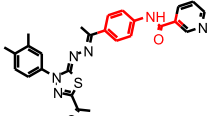<br><chem>[*][c]1:[cH]:[cH]:[c](NC(=O)[c](:[*]):[*])[cH]:[cH]:1</chem> | 0.434  | 12 out of 13            |
| SCFP_12                                | 2096901122  | <br><chem>[*]:[cH]:[c](NC(=O)[c](:[*]):[*])[cH]:[*]</chem>             | 0.429  | 33 out of 37            |
| Top Features for negative contribution |             |                                                                                                                                                           |        |                         |
| Fingerprint                            | Bit/Smiles  | Feature Structure                                                                                                                                         | Score  | Mutagen in training set |
| SCFP_12                                | -1630519606 | <br><chem>[*]C1=[*][*]C(=[*])S1</chem>                                 | -0.998 | 0 out of 3              |
| SCFP_12                                | -331724199  | <br><chem>[*]N=C(/C)[c](:[*]):[*]</chem>                             | -0.762 | 0 out of 2              |
| SCFP_12                                | 903335088   | <br><chem>[*]NC(=O)[c]1:[cH]:[cH]:[c]H:[*]:n:[cH]:1</chem>           | -0.762 | 0 out of 2              |

# Sorafenib

# TOPKAT\_Ames\_Mutagenicity

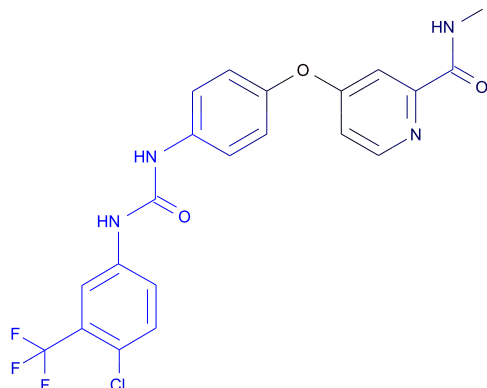

C<sub>21</sub>H<sub>16</sub>ClF<sub>3</sub>N<sub>4</sub>O<sub>3</sub>

Molecular Weight: 464.82494

ALogP: 4.175

Rotatable Bonds: 6

Acceptors: 4

Donors: 3

## Model Prediction

Prediction: Non-Mutagen

Probability: 0.0531

Enrichment: 0.0951

Bayesian Score: -19.7

Mahalanobis Distance: 13.1

Mahalanobis Distance p-value: 2.73e-006

Prediction: Positive if the Bayesian score is above the estimated best cutoff value from minimizing the false positive and false negative rate.

Probability: The estimated probability that the sample is in the positive category. This assumes that the Bayesian score follows a normal distribution and is different from the prediction using a cutoff.

Enrichment: An estimate of enrichment, that is, the increased likelihood (versus random) of this sample being in the category.

Bayesian Score: The standard Laplacian-modified Bayesian score.

Mahalanobis Distance: The Mahalanobis distance (MD) is the distance to the center of the training data. The larger the MD, the less trustworthy the prediction.

Mahalanobis Distance p-value: The p-value gives the fraction of training data with an MD greater than or equal to the one for the given sample, assuming normally distributed data. The smaller the p-value, the less trustworthy the prediction. For highly non-normal X properties (e.g., fingerprints), the MD p-value is wildly inaccurate.

## Structural Similar Compounds

| Name               | GLYBURIDE   | 38914-96-4                                       | 93957-54-1                                                                                                                                                          |
|--------------------|-------------|--------------------------------------------------|---------------------------------------------------------------------------------------------------------------------------------------------------------------------|
| Structure          |             |                                                  |                                                                                                                                                                     |
| Actual Endpoint    | Non-Mutagen | Mutagen                                          | Non-Mutagen                                                                                                                                                         |
| Predicted Endpoint | Non-Mutagen | Mutagen                                          | Non-Mutagen                                                                                                                                                         |
| Distance           | 0.590       | 0.592                                            | 0.600                                                                                                                                                               |
| Reference          | PDR 1994    | Kazius et. al., J. Med. Chem. (2005) 48, 312-320 | US Environmental Protection Agency at <a href="http://www.epa.gov/NCCT/dsstox/sdf_isscan_external.html">http://www.epa.gov/NCCT/dsstox/sdf_isscan_external.html</a> |

## Model Applicability

Unknown features are fingerprint features in the query molecule, but not found or appearing too infrequently in the training set.

- All properties and OPS components are within expected ranges.

## Feature Contribution

| Top features for positive contribution |            |                   |       |                         |
|----------------------------------------|------------|-------------------|-------|-------------------------|
| Fingerprint                            | Bit/Smiles | Feature Structure | Score | Mutagen in training set |
| SCFP_12                                | -347281112 |                   | 0.337 | 18 out of 22            |

|                                        |             |                                                                                                                                                                            |       |                         |
|----------------------------------------|-------------|----------------------------------------------------------------------------------------------------------------------------------------------------------------------------|-------|-------------------------|
| SCFP_12                                | 1208843554  | 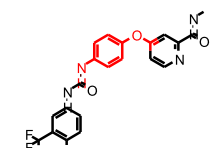<br>[*]N(c)F:[cH]:[cH]:[c<br>](O[c](:[*]):[*]):[c<br>H]:[cH]:1                          | 0.337 | 6 out of 7              |
| SCFP_12                                | -1943080297 | <br>[*]N(c)F:[cH]:[cH]:[c<br>](O[c]2:[cH]:[cH]:[*<br>]:[c]([*]):[cH]:2):[<br>cH]:[cH]:1 | 0.304 | 5 out of 6              |
| Top Features for negative contribution |             |                                                                                                                                                                            |       |                         |
| Fingerprint                            | Bit/Smiles  | Feature Structure                                                                                                                                                          | Score | Mutagen in training set |
| SCFP_12                                | 816802409   | <br>[*]NC(=O)N(c)1:[cH]:[<br>cH]:[c]([*]):[cH]:[c<br>H]:1                               | -1.82 | 0 out of 9              |
| SCFP_12                                | -1903175541 | <br>[*][c](:[*]):[c](:[cH<br>]:[*])C(F)(F)F                                            | -1.51 | 3 out of 30             |
| SCFP_12                                | -300280774  | <br>[*]:[c](:[*])C(F)(F)F                                                             | -1.51 | 3 out of 30             |

7a

## TOPKAT\_Developmental\_Toxicity\_Potential

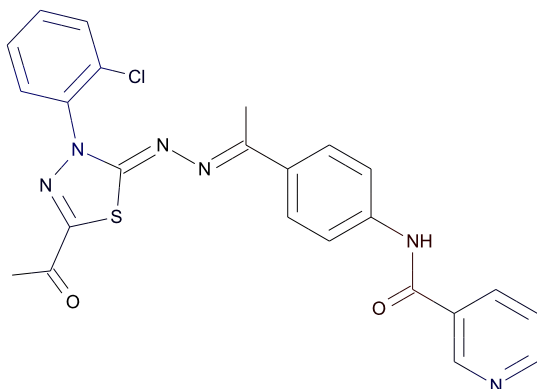C<sub>24</sub>H<sub>19</sub>ClN<sub>6</sub>O<sub>2</sub>S

Molecular Weight: 490.96466

ALogP: 4.258

Rotatable Bonds: 6

Acceptors: 8

Donors: 1

**Model Prediction**

Prediction: Non-Toxic

Probability: 0.42

Enrichment: 0.798

Bayesian Score: -3.74

Mahalanobis Distance: 10.6

Mahalanobis Distance p-value: 0.0037

Prediction: Positive if the Bayesian score is above the estimated best cutoff value from minimizing the false positive and false negative rate.

Probability: The estimated probability that the sample is in the positive category. This assumes that the Bayesian score follows a normal distribution and is different from the prediction using a cutoff.

Enrichment: An estimate of enrichment, that is, the increased likelihood (versus random) of this sample being in the category.

Bayesian Score: The standard Laplacian-modified Bayesian score.

Mahalanobis Distance: The Mahalanobis distance (MD) is the distance to the center of the training data. The larger the MD, the less trustworthy the prediction.

Mahalanobis Distance p-value: The p-value gives the fraction of training data with an MD greater than or equal to the one for the given sample, assuming normally distributed data. The smaller the p-value, the less trustworthy the prediction. For highly non-normal X properties (e.g., fingerprints), the MD p-value is wildly inaccurate.

**Structural Similar Compounds**

| Name               | Acemetacin                     | Beclomethasone Dipropionate      | Hydrocortisone-17-butyrate-21-propionate |
|--------------------|--------------------------------|----------------------------------|------------------------------------------|
| Structure          |                                |                                  |                                          |
| Actual Endpoint    | Non-Toxic                      | Toxic                            | Toxic                                    |
| Predicted Endpoint | Non-Toxic                      | Toxic                            | Toxic                                    |
| Distance           | 0.632                          | 0.646                            | 0.687                                    |
| Reference          | Oyo Yakuri 22(6):777-786; 1981 | Oyo Yakuri 18(6):1021-1038; 1979 | Oyo Yakuri 21:441-466; 1981              |

**Model Applicability**

Unknown features are fingerprint features in the query molecule, but not found or appearing too infrequently in the training set.

1. All properties and OPS components are within expected ranges.

**Feature Contribution****Top features for positive contribution**

| Fingerprint | Bit/Smiles | Feature Structure                          | Score | Toxic in training set |
|-------------|------------|--------------------------------------------|-------|-----------------------|
| SCFP_6      | 1257084377 | <br><chem>[*]NC(=O)[c]([*]):[*]:[*]</chem> | 0.362 | 14 out of 18          |

|                                        |             |                                                                                                                                                |        |                       |
|----------------------------------------|-------------|------------------------------------------------------------------------------------------------------------------------------------------------|--------|-----------------------|
| SCFP_6                                 | 903335088   | 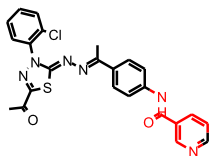<br><chem>[*]NC(=O)[c]1:[cH]:[cH]:[*]:n:[cH]:1</chem>       | 0.271  | 1 out of 1            |
| SCFP_6                                 | -331724199  | <br><chem>[*]N=C(/C/)[c](:[*]):[*]</chem>                   | 0.271  | 1 out of 1            |
| Top Features for negative contribution |             |                                                                                                                                                |        |                       |
| Fingerprint                            | Bit/Smiles  | Feature Structure                                                                                                                              | Score  | Toxic in training set |
| SCFP_6                                 | -758850909  | <br><chem>[*][c]1:[*]:n:[cH]:[cH]:[cH]:1</chem>             | -0.646 | 2 out of 9            |
| SCFP_6                                 | 1557430596  | <br><chem>[*]N([*])[c]1:[cH]:[*]:[cH]:[cH]:[c]:1Cl</chem> | -0.594 | 1 out of 5            |
| SCFP_6                                 | -1380909229 | <br><chem>[*]N([*])[c]1:[cH]:[cH]:[cH]:[c]:1[*]</chem>    | -0.449 | 6 out of 19           |

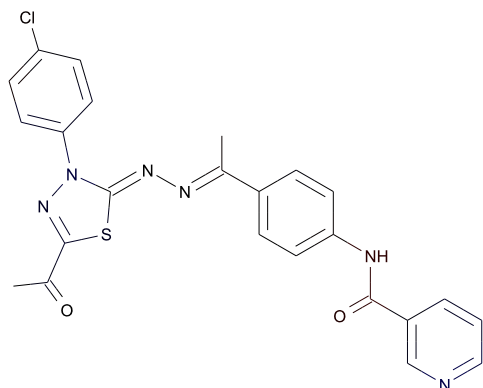

C<sub>24</sub>H<sub>19</sub>ClN<sub>6</sub>O<sub>2</sub>S

Molecular Weight: 490.96465

ALogP: 4.258

Rotatable Bonds: 6

Acceptors: 8

Donors: 1

## Model Prediction

Prediction: Non-Toxic

Probability: 0.463

Enrichment: 0.88

Bayesian Score: -2.37

Mahalanobis Distance: 10.7

Mahalanobis Distance p-value: 0.00263

Prediction: Positive if the Bayesian score is above the estimated best cutoff value from minimizing the false positive and false negative rate.

Probability: The estimated probability that the sample is in the positive category. This assumes that the Bayesian score follows a normal distribution and is different from the prediction using a cutoff.

Enrichment: An estimate of enrichment, that is, the increased likelihood (versus random) of this sample being in the category.

Bayesian Score: The standard Laplacian-modified Bayesian score.

Mahalanobis Distance: The Mahalanobis distance (MD) is the distance to the center of the training data. The larger the MD, the less trustworthy the prediction.

Mahalanobis Distance p-value: The p-value gives the fraction of training data with an MD greater than or equal to the one for the given sample, assuming normally distributed data. The smaller the p-value, the less trustworthy the prediction. For highly non-normal X properties (e.g., fingerprints), the MD p-value is wildly inaccurate.

## Structural Similar Compounds

| Name               | Acemetacin                     | Beclomethasone Dipropionate      | Hydrocortisone-17-butyrate-21-propionate |
|--------------------|--------------------------------|----------------------------------|------------------------------------------|
| Structure          |                                |                                  |                                          |
| Actual Endpoint    | Non-Toxic                      | Toxic                            | Toxic                                    |
| Predicted Endpoint | Non-Toxic                      | Toxic                            | Toxic                                    |
| Distance           | 0.622                          | 0.645                            | 0.686                                    |
| Reference          | Oyo Yakuri 22(6):777-786; 1981 | Oyo Yakuri 18(6):1021-1038; 1979 | Oyo Yakuri 21:441-466; 1981              |

## Model Applicability

Unknown features are fingerprint features in the query molecule, but not found or appearing too infrequently in the training set.

1. All properties and OPS components are within expected ranges.

## Feature Contribution

### Top features for positive contribution

| Fingerprint | Bit/Smiles | Feature Structure                       | Score | Toxic in training set |
|-------------|------------|-----------------------------------------|-------|-----------------------|
| SCFP_6      | 1257084377 | <br><chem>[*]NC(=O)[c](:[*]):[*]</chem> | 0.362 | 14 out of 18          |

|                                        |             |                                                                                                                                                |        |                       |
|----------------------------------------|-------------|------------------------------------------------------------------------------------------------------------------------------------------------|--------|-----------------------|
| SCFP_6                                 | 903335088   | 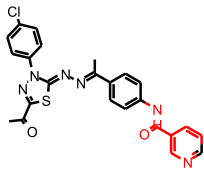<br><chem>[*]NC(=O)[c]1:[cH]:[cH]:[*]:n:[cH]:1</chem>       | 0.271  | 1 out of 1            |
| SCFP_6                                 | -331724199  | <br><chem>[*]N=C(/C)[c]:[*]:[*]</chem>                      | 0.271  | 1 out of 1            |
| Top Features for negative contribution |             |                                                                                                                                                |        |                       |
| Fingerprint                            | Bit/Smiles  | Feature Structure                                                                                                                              | Score  | Toxic in training set |
| SCFP_6                                 | -758850909  | <br><chem>[*][c]1:[*]:n:[cH]:[cH]:[cH]:1</chem>             | -0.646 | 2 out of 9            |
| SCFP_6                                 | -1380909229 | <br><chem>[*]N([*])[c]1:[cH]:[cH]:[cH]:[*]:[c]:1[*]</chem> | -0.449 | 6 out of 19           |
| SCFP_6                                 | -704135030  | <br><chem>[*]C(=[*])C1=N[*][*]S1</chem>                   | -0.422 | 0 out of 1            |



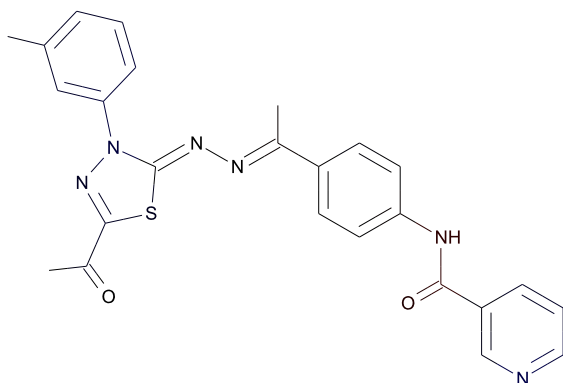

$C_{25}H_{22}N_6O_2S$

Molecular Weight: 470.54617

ALogP: 4.08

Rotatable Bonds: 6

Acceptors: 8

Donors: 1

## Model Prediction

Prediction: Non-Toxic

Probability: 0.439

Enrichment: 0.834

Bayesian Score: -3.12

Mahalanobis Distance: 10.6

Mahalanobis Distance p-value: 0.00398

Prediction: Positive if the Bayesian score is above the estimated best cutoff value from minimizing the false positive and false negative rate.

Probability: The estimated probability that the sample is in the positive category. This assumes that the Bayesian score follows a normal distribution and is different from the prediction using a cutoff.

Enrichment: An estimate of enrichment, that is, the increased likelihood (versus random) of this sample being in the category.

Bayesian Score: The standard Laplacian-modified Bayesian score.

Mahalanobis Distance: The Mahalanobis distance (MD) is the distance to the center of the training data. The larger the MD, the less trustworthy the prediction.

Mahalanobis Distance p-value: The p-value gives the fraction of training data with an MD greater than or equal to the one for the given sample, assuming normally distributed data. The smaller the p-value, the less trustworthy the prediction. For highly non-normal X properties (e.g., fingerprints), the MD p-value is wildly inaccurate.

## Structural Similar Compounds

| Name               | Acemetacin                     | Beclomethasone Dipropionate      | Hydrocortisone-17-butyrate-21-propionate |
|--------------------|--------------------------------|----------------------------------|------------------------------------------|
| Structure          |                                |                                  |                                          |
| Actual Endpoint    | Non-Toxic                      | Toxic                            | Toxic                                    |
| Predicted Endpoint | Non-Toxic                      | Toxic                            | Toxic                                    |
| Distance           | 0.625                          | 0.656                            | 0.685                                    |
| Reference          | Oyo Yakuri 22(6):777-786; 1981 | Oyo Yakuri 18(6):1021-1038; 1979 | Oyo Yakuri 21:441-466; 1981              |

## Model Applicability

Unknown features are fingerprint features in the query molecule, but not found or appearing too infrequently in the training set.

1. OPS PC14 out of range. Value: 4.5388. Training min, max, SD, explained variance: -3.5766, 3.955, 1.214, 0.0216.

## Feature Contribution

| Top features for positive contribution |            |                                         |       |                       |
|----------------------------------------|------------|-----------------------------------------|-------|-----------------------|
| Fingerprint                            | Bit/Smiles | Feature Structure                       | Score | Toxic in training set |
| SCFP_6                                 | 1257084377 | <br><chem>[*]NC(=O)[c](:[*]):[*]</chem> | 0.362 | 14 out of 18          |

| SCFP_6                                 | 903335088   | 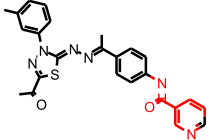<br><chem>[*]NC(=O)[c]1:[cH]:[cH]:[*]:n:[cH]:1</chem> | 0.271  | 1 out of 1            |
|----------------------------------------|-------------|------------------------------------------------------------------------------------------------------------------------------------------|--------|-----------------------|
| SCFP_6                                 | -331724199  | <br><chem>[*]N=C(/C)([c](:[*])):[*]</chem>            | 0.271  | 1 out of 1            |
| Top Features for negative contribution |             |                                                                                                                                          |        |                       |
| Fingerprint                            | Bit/Smiles  | Feature Structure                                                                                                                        | Score  | Toxic in training set |
| SCFP_6                                 | -758850909  | <br><chem>[*][c]1:[*]:n:[cH]:[cH]:[cH]:1</chem>       | -0.646 | 2 out of 9            |
| SCFP_6                                 | -1380909229 | <br><chem>[*]N([*])[c]1:[cH]:[cH]:[cH]:[*]:1</chem>  | -0.449 | 6 out of 19           |
| SCFP_6                                 | -704135030  | <br><chem>[*]C(=[*])C1=N[*]S1</chem>                | -0.422 | 0 out of 1            |

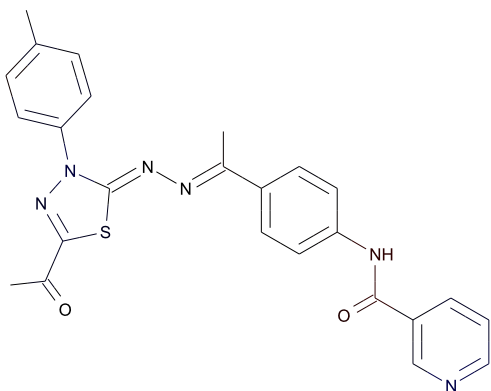

$C_{25}H_{22}N_6O_2S$

Molecular Weight: 470.54617

ALogP: 4.08

Rotatable Bonds: 6

Acceptors: 8

Donors: 1

## Model Prediction

Prediction: Non-Toxic

Probability: 0.456

Enrichment: 0.868

Bayesian Score: -2.57

Mahalanobis Distance: 11.1

Mahalanobis Distance p-value: 0.00091

Prediction: Positive if the Bayesian score is above the estimated best cutoff value from minimizing the false positive and false negative rate.

Probability: The estimated probability that the sample is in the positive category. This assumes that the Bayesian score follows a normal distribution and is different from the prediction using a cutoff.

Enrichment: An estimate of enrichment, that is, the increased likelihood (versus random) of this sample being in the category.

Bayesian Score: The standard Laplacian-modified Bayesian score.

Mahalanobis Distance: The Mahalanobis distance (MD) is the distance to the center of the training data. The larger the MD, the less trustworthy the prediction.

Mahalanobis Distance p-value: The p-value gives the fraction of training data with an MD greater than or equal to the one for the given sample, assuming normally distributed data. The smaller the p-value, the less trustworthy the prediction. For highly non-normal X properties (e.g., fingerprints), the MD p-value is wildly inaccurate.

## Structural Similar Compounds

| Name               | Acemetacin                     | Beclomethasone Dipropionate      | Hydrocortisone-17-butyrate-21-propionate |
|--------------------|--------------------------------|----------------------------------|------------------------------------------|
| Structure          |                                |                                  |                                          |
| Actual Endpoint    | Non-Toxic                      | Toxic                            | Toxic                                    |
| Predicted Endpoint | Non-Toxic                      | Toxic                            | Toxic                                    |
| Distance           | 0.624                          | 0.656                            | 0.685                                    |
| Reference          | Oyo Yakuri 22(6):777-786; 1981 | Oyo Yakuri 18(6):1021-1038; 1979 | Oyo Yakuri 21:441-466; 1981              |

## Model Applicability

Unknown features are fingerprint features in the query molecule, but not found or appearing too infrequently in the training set.

1. OPS PC14 out of range. Value: 4.4401. Training min, max, SD, explained variance: -3.5766, 3.955, 1.214, 0.0216.

## Feature Contribution

| Top features for positive contribution |            |                                         |       |                       |
|----------------------------------------|------------|-----------------------------------------|-------|-----------------------|
| Fingerprint                            | Bit/Smiles | Feature Structure                       | Score | Toxic in training set |
| SCFP_6                                 | 1257084377 | <br><chem>[*]NC(=O)[c](:[*]):[*]</chem> | 0.362 | 14 out of 18          |

|                                        |             |                                                                                                                                        |        |                       |
|----------------------------------------|-------------|----------------------------------------------------------------------------------------------------------------------------------------|--------|-----------------------|
| SCFP_6                                 | 903335088   | 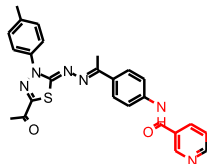<br>[*]NC(=O)[c]1:[cH]:[cH]:[cH]:[*]:n:[cH]:1       | 0.271  | 1 out of 1            |
| SCFP_6                                 | 795925860   | <br>[*][c]1:[cH]:[cH]:[cH]:[c](C):[cH]:[cH]:1       | 0.271  | 1 out of 1            |
| Top Features for negative contribution |             |                                                                                                                                        |        |                       |
| Fingerprint                            | Bit/Smiles  | Feature Structure                                                                                                                      | Score  | Toxic in training set |
| SCFP_6                                 | -758850909  | <br>[*][c]1:[*]:n:[cH]:[cH]:[cH]:1                  | -0.646 | 2 out of 9            |
| SCFP_6                                 | -1380909229 | <br>[*]N([*])[c]1:[cH]:[cH]:[cH]:[cH]:[*]:[c]:1[*] | -0.449 | 6 out of 19           |
| SCFP_6                                 | -704135030  | <br>[*]C(=[*])C1=N[*]1[*]S1                       | -0.422 | 0 out of 1            |

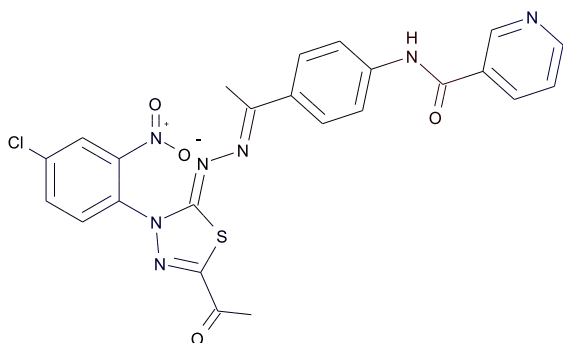

$C_{24}H_{18}ClN_7O_4S$

Molecular Weight: 535.96222

ALogP: 4.153

Rotatable Bonds: 7

Acceptors: 10

Donors: 1

## Model Prediction

Prediction: Non-Toxic

Probability: 0.422

Enrichment: 0.803

Bayesian Score: -3.65

Mahalanobis Distance: 11.2

Mahalanobis Distance p-value: 0.000497

Prediction: Positive if the Bayesian score is above the estimated best cutoff value from minimizing the false positive and false negative rate.

Probability: The estimated probability that the sample is in the positive category. This assumes that the Bayesian score follows a normal distribution and is different from the prediction using a cutoff.

Enrichment: An estimate of enrichment, that is, the increased likelihood (versus random) of this sample being in the category.

Bayesian Score: The standard Laplacian-modified Bayesian score.

Mahalanobis Distance: The Mahalanobis distance (MD) is the distance to the center of the training data. The larger the MD, the less trustworthy the prediction.

Mahalanobis Distance p-value: The p-value gives the fraction of training data with an MD greater than or equal to the one for the given sample, assuming normally distributed data. The smaller the p-value, the less trustworthy the prediction. For highly non-normal X properties (e.g., fingerprints), the MD p-value is wildly inaccurate.

## Structural Similar Compounds

| Name               | Reserpate                   | Beclomethasone Dipropionate      | Hydrocortisone-17-butyrate-21-propionate |
|--------------------|-----------------------------|----------------------------------|------------------------------------------|
| Structure          |                             |                                  |                                          |
| Actual Endpoint    | Toxic                       | Toxic                            | Toxic                                    |
| Predicted Endpoint | Toxic                       | Toxic                            | Toxic                                    |
| Distance           | 0.736                       | 0.756                            | 0.775                                    |
| Reference          | Oyo Yakuri 18:105-124; 1979 | Oyo Yakuri 18(6):1021-1038; 1979 | Oyo Yakuri 21:441-466; 1981              |

## Model Applicability

Unknown features are fingerprint features in the query molecule, but not found or appearing too infrequently in the training set.

1. All properties and OPS components are within expected ranges.

## Feature Contribution

### Top features for positive contribution

| Fingerprint | Bit/Smiles | Feature Structure                      | Score | Toxic in training set |
|-------------|------------|----------------------------------------|-------|-----------------------|
| SCFP_6      | 1257084377 | <br><chem>[*]NC(=O)[c]([*]):[*]</chem> | 0.362 | 14 out of 18          |

| SCFP_6                                 | 903335088   | 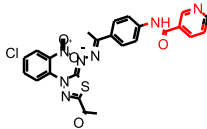<br><chem>[*]NC(=O)[c]1:[cH]:[cH]:[cH]:[*]:n:[cH]:1</chem>              | 0.271  | 1 out of 1            |
|----------------------------------------|-------------|------------------------------------------------------------------------------------------------------------------------------------------------------------|--------|-----------------------|
| SCFP_6                                 | 1907765814  | <br><chem>[*][c]1:[cH]:[cH]:[cH]:[c](Cl):[cH]:[c]:1[N+](=[*])[*]</chem> | 0.271  | 1 out of 1            |
| Top Features for negative contribution |             |                                                                                                                                                            |        |                       |
| Fingerprint                            | Bit/Smiles  | Feature Structure                                                                                                                                          | Score  | Toxic in training set |
| SCFP_6                                 | -758850909  | <br><chem>[*][c]1:[*]:n:[cH]:[cH]:[cH]:1</chem>                         | -0.646 | 2 out of 9            |
| SCFP_6                                 | 1807097289  | <br><chem>[*][c]1:[*]:[cH]:[c](Cl):[cH]:[c]:1[N+](=[*])[*]</chem>      | -0.594 | 1 out of 5            |
| SCFP_6                                 | -1380909229 | <br><chem>[*]N([*])[c]1:[cH]:[cH]:[cH]:[c]:1[*]</chem>                | -0.449 | 6 out of 19           |

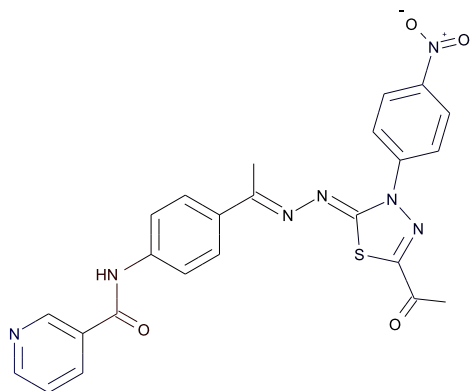

$C_{24}H_{19}N_7O_4S$

Molecular Weight: 501.51715

ALogP: 3.488

Rotatable Bonds: 7

Acceptors: 10

Donors: 1

## Model Prediction

Prediction: Non-Toxic

Probability: 0.44

Enrichment: 0.836

Bayesian Score: -3.09

Mahalanobis Distance: 10.8

Mahalanobis Distance p-value: 0.00224

Prediction: Positive if the Bayesian score is above the estimated best cutoff value from minimizing the false positive and false negative rate.

Probability: The estimated probability that the sample is in the positive category. This assumes that the Bayesian score follows a normal distribution and is different from the prediction using a cutoff.

Enrichment: An estimate of enrichment, that is, the increased likelihood (versus random) of this sample being in the category.

Bayesian Score: The standard Laplacian-modified Bayesian score.

Mahalanobis Distance: The Mahalanobis distance (MD) is the distance to the center of the training data. The larger the MD, the less trustworthy the prediction.

Mahalanobis Distance p-value: The p-value gives the fraction of training data with an MD greater than or equal to the one for the given sample, assuming normally distributed data. The smaller the p-value, the less trustworthy the prediction. For highly non-normal X properties (e.g., fingerprints), the MD p-value is wildly inaccurate.

## Structural Similar Compounds

| Name               | Lenampicillin .HCl (Free base form) | Cyclic AMP Bucladesine         | Bacampicillin .HCl (Free base form) |
|--------------------|-------------------------------------|--------------------------------|-------------------------------------|
| Structure          |                                     |                                |                                     |
| Actual Endpoint    | Non-Toxic                           | Non-Toxic                      | Toxic                               |
| Predicted Endpoint | Non-Toxic                           | Non-Toxic                      | Non-Toxic                           |
| Distance           | 0.758                               | 0.759                          | 0.770                               |
| Reference          | Chemotherapy 32:130-145; 1984       | Oyo Yakuri 27(3):585-597; 1984 | Chemotherapy 27:30-35; 1979         |

## Model Applicability

Unknown features are fingerprint features in the query molecule, but not found or appearing too infrequently in the training set.

1. All properties and OPS components are within expected ranges.

## Feature Contribution

### Top features for positive contribution

| Fingerprint | Bit/Smiles | Feature Structure                  | Score | Toxic in training set |
|-------------|------------|------------------------------------|-------|-----------------------|
| SCFP_6      | 1257084377 | <br>[*]NC(=O)[c]([*]):[*]:[*]<br>] | 0.362 | 14 out of 18          |

| SCFP_6                                 | -331724199  | 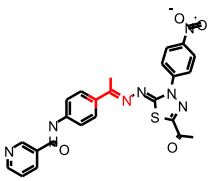<br><chem>[*]N=C(/C)[c]([*])</chem>                         | 0.271  | 1 out of 1            |
|----------------------------------------|-------------|------------------------------------------------------------------------------------------------------------------------------------------------|--------|-----------------------|
| SCFP_6                                 | 903335088   | <br><chem>[*]NC(=O)[c]1:[cH]:[cH]:[*]:n:[cH]:1</chem>       | 0.271  | 1 out of 1            |
| Top Features for negative contribution |             |                                                                                                                                                |        |                       |
| Fingerprint                            | Bit/Smiles  | Feature Structure                                                                                                                              | Score  | Toxic in training set |
| SCFP_6                                 | -758850909  | <br><chem>[*][c]1:[*]:n:[cH]:[cH]:[cH]:1</chem>             | -0.646 | 2 out of 9            |
| SCFP_6                                 | -1380909229 | <br><chem>[*]N([*])[c]1:[cH]:[cH]:[cH]:[*]:[c]:1[*]</chem> | -0.449 | 6 out of 19           |
| SCFP_6                                 | 1311339974  | <br><chem>[*][N+](=O)[*]</chem>                           | -0.446 | 3 out of 10           |



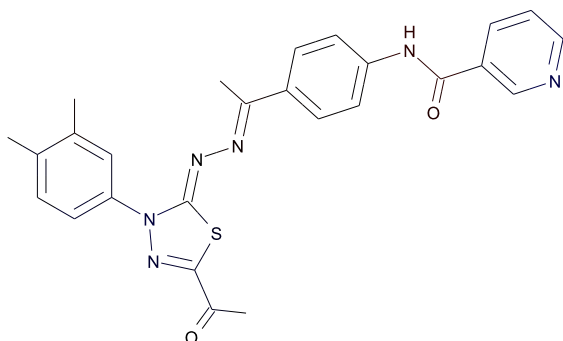

$C_{26}H_{24}N_6O_2S$

Molecular Weight: 484.57275

ALogP: 4.566

Rotatable Bonds: 6

Acceptors: 8

Donors: 1

## Model Prediction

Prediction: Non-Toxic

Probability: 0.456

Enrichment: 0.868

Bayesian Score: -2.57

Mahalanobis Distance: 11.1

Mahalanobis Distance p-value: 0.000762

Prediction: Positive if the Bayesian score is above the estimated best cutoff value from minimizing the false positive and false negative rate.

Probability: The estimated probability that the sample is in the positive category. This assumes that the Bayesian score follows a normal distribution and is different from the prediction using a cutoff.

Enrichment: An estimate of enrichment, that is, the increased likelihood (versus random) of this sample being in the category.

Bayesian Score: The standard Laplacian-modified Bayesian score.

Mahalanobis Distance: The Mahalanobis distance (MD) is the distance to the center of the training data. The larger the MD, the less trustworthy the prediction.

Mahalanobis Distance p-value: The p-value gives the fraction of training data with an MD greater than or equal to the one for the given sample, assuming normally distributed data. The smaller the p-value, the less trustworthy the prediction. For highly non-normal X properties (e.g., fingerprints), the MD p-value is wildly inaccurate.

## Structural Similar Compounds

| Name               | Acemetacin                     | Beclomethasone Dipropionate      | Hydrocortisone-17-butyrate-21-propionate |
|--------------------|--------------------------------|----------------------------------|------------------------------------------|
| Structure          |                                |                                  |                                          |
| Actual Endpoint    | Non-Toxic                      | Toxic                            | Toxic                                    |
| Predicted Endpoint | Non-Toxic                      | Toxic                            | Toxic                                    |
| Distance           | 0.639                          | 0.649                            | 0.689                                    |
| Reference          | Oyo Yakuri 22(6):777-786; 1981 | Oyo Yakuri 18(6):1021-1038; 1979 | Oyo Yakuri 21:441-466; 1981              |

## Model Applicability

Unknown features are fingerprint features in the query molecule, but not found or appearing too infrequently in the training set.

1. OPS PC14 out of range. Value: 4.4679. Training min, max, SD, explained variance: -3.5766, 3.955, 1.214, 0.0216.

## Feature Contribution

| Top features for positive contribution |            |                                         |       |                       |
|----------------------------------------|------------|-----------------------------------------|-------|-----------------------|
| Fingerprint                            | Bit/Smiles | Feature Structure                       | Score | Toxic in training set |
| SCFP_6                                 | 1257084377 | <br><chem>[*]NC(=O)[c](:[*]):[*]</chem> | 0.362 | 14 out of 18          |

| SCFP_6                                 | 1789155233  | 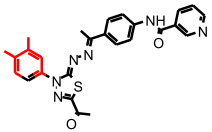<br>[*][c]1:[*]:[cH]:[c](C):[c](C):[cH]:1      | 0.271  | 1 out of 1            |
|----------------------------------------|-------------|-----------------------------------------------------------------------------------------------------------------------------------|--------|-----------------------|
| SCFP_6                                 | -331724199  | <br>[*]N=C(C)[c](:[*]) :[*]                    | 0.271  | 1 out of 1            |
| Top Features for negative contribution |             |                                                                                                                                   |        |                       |
| Fingerprint                            | Bit/Smiles  | Feature Structure                                                                                                                 | Score  | Toxic in training set |
| SCFP_6                                 | -758850909  | <br>[*][c]1:[*]:n:[cH]:[cH]:[cH]:1             | -0.646 | 2 out of 9            |
| SCFP_6                                 | -1380909229 | <br>[*]N([*])[c]1:[cH]:[cH]:[cH]:[*]:[c]:1[*] | -0.449 | 6 out of 19           |
| SCFP_6                                 | -704135030  | <br>[*]C(=[*])C1=N[*][*]S1                   | -0.422 | 0 out of 1            |

# Sorafenib

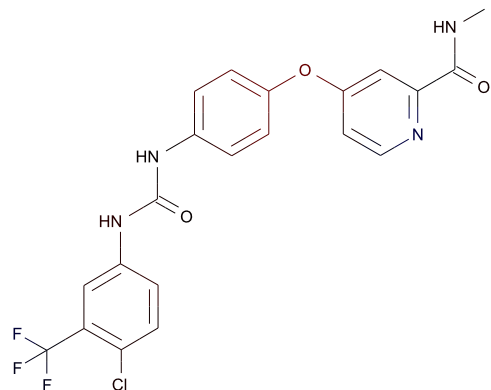

$C_{21}H_{16}ClF_3N_4O_3$

Molecular Weight: 464.82494

ALogP: 4.175

Rotatable Bonds: 6

Acceptors: 4

Donors: 3

## Model Prediction

**Prediction: Toxic**

Probability: 0.592

Enrichment: 1.13

Bayesian Score: 1.15

Mahalanobis Distance: 12.6

Mahalanobis Distance p-value: 2.07e-006

Prediction: Positive if the Bayesian score is above the estimated best cutoff value from minimizing the false positive and false negative rate.

Probability: The estimated probability that the sample is in the positive category. This assumes that the Bayesian score follows a normal distribution and is different from the prediction using a cutoff.

Enrichment: An estimate of enrichment, that is, the increased likelihood (versus random) of this sample being in the category.

Bayesian Score: The standard Laplacian-modified Bayesian score.

Mahalanobis Distance: The Mahalanobis distance (MD) is the distance to the center of the training data. The larger the MD, the less trustworthy the prediction.

Mahalanobis Distance p-value: The p-value gives the fraction of training data with an MD greater than or equal to the one for the given sample, assuming normally distributed data. The smaller the p-value, the less trustworthy the prediction. For highly non-normal X properties (e.g., fingerprints), the MD p-value is wildly inaccurate.

# TOPKAT\_Developmental\_Toxicity\_Potential

## Structural Similar Compounds

| Name               | Chenodioli                       | Amsacrine                             | Ochratoxin a                             |
|--------------------|----------------------------------|---------------------------------------|------------------------------------------|
| Structure          |                                  |                                       |                                          |
| Actual Endpoint    | Toxic                            | Toxic                                 | Toxic                                    |
| Predicted Endpoint | Toxic                            | Toxic                                 | Toxic                                    |
| Distance           | 0.631                            | 0.637                                 | 0.644                                    |
| Reference          | Arch Int Pharm 246:149-158; 1980 | Fundam Appl Toxicol 7(2):214-20; 1986 | Toxicol Appl Pharmacol 37(2):331-8; 1976 |

## Model Applicability

Unknown features are fingerprint features in the query molecule, but not found or appearing too infrequently in the training set.

1. All properties and OPS components are within expected ranges.

## Feature Contribution

### Top features for positive contribution

| Fingerprint | Bit/Smiles | Feature Structure                                 | Score | Toxic in training set |
|-------------|------------|---------------------------------------------------|-------|-----------------------|
| SCFP_6      | 1559190850 | <br>[*]C([*])([*])[c]1:[c]H:[*]:[cH]:[cH]:[c]:1Cl | 0.441 | 3 out of 3            |

| SCFP_6                                 | -488587948  | 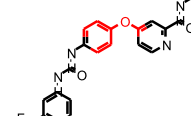<br><chem>[*].[c]([*])O[c]1:[cH]:[cH]:[cH]:[cH]:1</chem>                           | 0.381  | 2 out of 2            |
|----------------------------------------|-------------|-----------------------------------------------------------------------------------------------------------------------------------------------------------------------|--------|-----------------------|
| SCFP_6                                 | -975241316  | <br><chem>[*][c]1:[cH]:[cH]:[cH]:[c]([O[c](:[cH]:[*]):[cH]:[*]):[cH]:[cH]:1</chem> | 0.381  | 2 out of 2            |
| Top Features for negative contribution |             |                                                                                                                                                                       |        |                       |
| Fingerprint                            | Bit/Smiles  | Feature Structure                                                                                                                                                     | Score  | Toxic in training set |
| SCFP_6                                 | -1794974220 | <br><chem>[*]C([*])([*])F</chem>                                                   | -0.55  | 2 out of 8            |
| SCFP_6                                 | -937094999  | <br><chem>[*]1:[cH]:[cH]:[cH]:n:[cH]:1</chem>                                     | -0.358 | 3 out of 9            |
| SCFP_6                                 | -496201075  | <br><chem>[*][c]([*]):[cH]:n:[*]</chem>                                          | -0.289 | 8 out of 21           |

7a

## TOPKAT\_Mouse\_Female\_FDA\_None\_vs\_Carcinogen

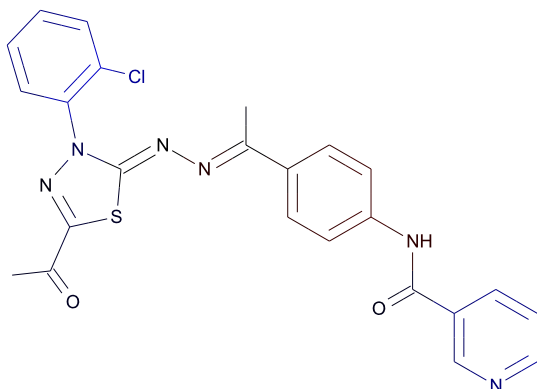C<sub>24</sub>H<sub>19</sub>ClN<sub>6</sub>O<sub>2</sub>S

Molecular Weight: 490.96466

ALogP: 4.258

Rotatable Bonds: 6

Acceptors: 8

Donors: 1

**Model Prediction**

Prediction: Non-Carcinogen

Probability: 0.208

Enrichment: 0.649

Bayesian Score: -7.85

Mahalanobis Distance: 14.2

Mahalanobis Distance p-value: 7.34e-006

Prediction: Positive if the Bayesian score is above the estimated best cutoff value from minimizing the false positive and false negative rate.

Probability: The estimated probability that the sample is in the positive category. This assumes that the Bayesian score follows a normal distribution and is different from the prediction using a cutoff.

Enrichment: An estimate of enrichment, that is, the increased likelihood (versus random) of this sample being in the category.

Bayesian Score: The standard Laplacian-modified Bayesian score.

Mahalanobis Distance: The Mahalanobis distance (MD) is the distance to the center of the training data. The larger the MD, the less trustworthy the prediction.

Mahalanobis Distance p-value: The p-value gives the fraction of training data with an MD greater than or equal to the one for the given sample, assuming normally distributed data. The smaller the p-value, the less trustworthy the prediction. For highly non-normal X properties (e.g., fingerprints), the MD p-value is wildly inaccurate.

**Structural Similar Compounds**

| Name               | Fluticasone                                                         | Moricizine                                                          | Doxazosin                                                           |
|--------------------|---------------------------------------------------------------------|---------------------------------------------------------------------|---------------------------------------------------------------------|
| Structure          |                                                                     |                                                                     |                                                                     |
| Actual Endpoint    | Non-Carcinogen                                                      | Carcinogen                                                          | Non-Carcinogen                                                      |
| Predicted Endpoint | Non-Carcinogen                                                      | Carcinogen                                                          | Non-Carcinogen                                                      |
| Distance           | 0.661                                                               | 0.666                                                               | 0.695                                                               |
| Reference          | US FDA (Centre for Drug Eval.& Res./Off. Testing & Res.) Sept. 1997 | US FDA (Centre for Drug Eval.& Res./Off. Testing & Res.) Sept. 1997 | US FDA (Centre for Drug Eval.& Res./Off. Testing & Res.) Sept. 1997 |

**Model Applicability**

Unknown features are fingerprint features in the query molecule, but not found or appearing too infrequently in the training set.

- OPS PC28 out of range. Value: 3.6547. Training min, max, SD, explained variance: -2.8298, 3.1935, 1.043, 0.0111.
- Unknown ECFP\_2 feature: 128986386: [\*]N=C(/C)[c](:[\*]):[\*]
- Unknown ECFP\_2 feature: 562081661: [\*]C(=NN=[\*])[\*]
- Unknown ECFP\_2 feature: -819426257: [\*]C(=NN=[\*])[\*]
- Unknown ECFP\_2 feature: 189949281: [\*]N=C\1/S[\*]=[\*]N1[\*]
- Unknown ECFP\_2 feature: -1110911409: [\*]=C1[\*][\*]=NN1[c](:[\*]):[\*]
- Unknown ECFP\_2 feature: -934225701: [\*]C(=[\*])C1=N[\*][\*]S1

**Feature Contribution****Top features for positive contribution**

| Fingerprint | Bit/Smiles | Feature Structure | Score | Carcinogen in training set |
|-------------|------------|-------------------|-------|----------------------------|
|-------------|------------|-------------------|-------|----------------------------|

|                                        |             |                                                                                                                                                    |        |                            |
|----------------------------------------|-------------|----------------------------------------------------------------------------------------------------------------------------------------------------|--------|----------------------------|
| ECFP_6                                 | -1087070950 | 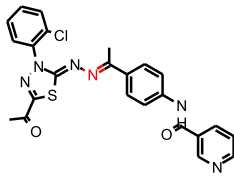<br><chem>[*]N=[*]</chem>                                       | 0.724  | 10 out of 14               |
| ECFP_6                                 | 738938915   | <br><chem>[*]C(=[*])N[c]1:[cH]:[cH]:[*]:[cH]:[cH]:[cH]:1</chem> | 0.617  | 2 out of 2                 |
| ECFP_6                                 | -177077903  | <br><chem>[*]N[c](:[cH]:[*]):[cH]:[*]</chem>                    | 0.279  | 4 out of 9                 |
| Top Features for negative contribution |             |                                                                                                                                                    |        |                            |
| Fingerprint                            | Bit/Smiles  | Feature Structure                                                                                                                                  | Score  | Carcinogen in training set |
| ECFP_6                                 | -1625071872 | <br><chem>[*][c]1:[cH]:[cH]:[cH]:[cH]:[cH]:[c]:1Cl</chem>      | -0.935 | 0 out of 5                 |
| ECFP_6                                 | 2013347047  | <br><chem>[*][c]1:[*]:n:[cH]:[cH]:[cH]:1</chem>               | -0.805 | 0 out of 4                 |

ECFP\_6

1641317964

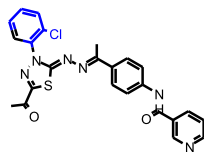

[\*][c]1:[\*]:[cH]:[cH]  
:[cH]:[c]:1Cl

-0.789

1 out of 11

7b

## TOPKAT\_Mouse\_Female\_FDA\_None\_vs\_Carcinogen

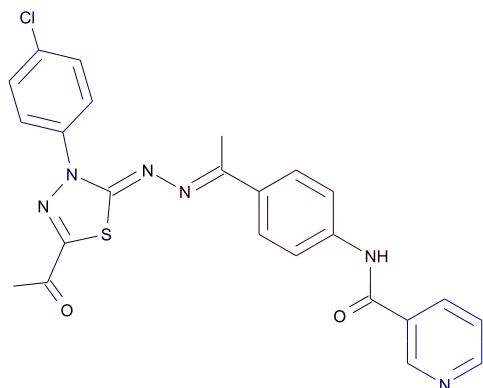C<sub>24</sub>H<sub>19</sub>ClN<sub>6</sub>O<sub>2</sub>S

Molecular Weight: 490.96465

ALogP: 4.258

Rotatable Bonds: 6

Acceptors: 8

Donors: 1

**Model Prediction**

Prediction: Non-Carcinogen

Probability: 0.205

Enrichment: 0.64

Bayesian Score: -6.85

Mahalanobis Distance: 15.5

Mahalanobis Distance p-value: 2.29e-008

Prediction: Positive if the Bayesian score is above the estimated best cutoff value from minimizing the false positive and false negative rate.

Probability: The estimated probability that the sample is in the positive category. This assumes that the Bayesian score follows a normal distribution and is different from the prediction using a cutoff.

Enrichment: An estimate of enrichment, that is, the increased likelihood (versus random) of this sample being in the category.

Bayesian Score: The standard Laplacian-modified Bayesian score.

Mahalanobis Distance: The Mahalanobis distance (MD) is the distance to the center of the training data. The larger the MD, the less trustworthy the prediction.

Mahalanobis Distance p-value: The p-value gives the fraction of training data with an MD greater than or equal to the one for the given sample, assuming normally distributed data. The smaller the p-value, the less trustworthy the prediction. For highly non-normal X properties (e.g., fingerprints), the MD p-value is wildly inaccurate.

**Structural Similar Compounds**

| Name               | Fluticasone                                                         | Moricizine                                                          | Doxazosin                                                           |
|--------------------|---------------------------------------------------------------------|---------------------------------------------------------------------|---------------------------------------------------------------------|
| Structure          |                                                                     |                                                                     |                                                                     |
| Actual Endpoint    | Non-Carcinogen                                                      | Carcinogen                                                          | Non-Carcinogen                                                      |
| Predicted Endpoint | Non-Carcinogen                                                      | Carcinogen                                                          | Non-Carcinogen                                                      |
| Distance           | 0.661                                                               | 0.681                                                               | 0.699                                                               |
| Reference          | US FDA (Centre for Drug Eval.& Res./Off. Testing & Res.) Sept. 1997 | US FDA (Centre for Drug Eval.& Res./Off. Testing & Res.) Sept. 1997 | US FDA (Centre for Drug Eval.& Res./Off. Testing & Res.) Sept. 1997 |

**Model Applicability**

Unknown features are fingerprint features in the query molecule, but not found or appearing too infrequently in the training set.

1. All properties and OPS components are within expected ranges.
2. Unknown ECFP\_2 feature: 128986386: [\*]N=C(/C)[c](:[\*]):[\*]
3. Unknown ECFP\_2 feature: 562081661: [\*]C(=NN=[\*])[\*]
4. Unknown ECFP\_2 feature: -819426257: [\*]C(=NN=[\*])[\*]
5. Unknown ECFP\_2 feature: 189949281: [\*]N=C\1/S[\*]=[\*]N1[\*]
6. Unknown ECFP\_2 feature: -1110911409: [\*]=C1[\*][\*]=NN1[c](:[\*]):[\*]
7. Unknown ECFP\_2 feature: -934225701: [\*]C(=[\*])C1=N[\*][\*]S1

**Feature Contribution****Top features for positive contribution**

| Fingerprint | Bit/Smiles | Feature Structure | Score | Carcinogen in training set |
|-------------|------------|-------------------|-------|----------------------------|
|-------------|------------|-------------------|-------|----------------------------|



|                                        |             |                                                                                                                                                    |        |                            |
|----------------------------------------|-------------|----------------------------------------------------------------------------------------------------------------------------------------------------|--------|----------------------------|
| ECFP_6                                 | -1087070950 | 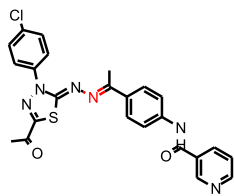<br><chem>[*]N=[*]</chem>                                        | 0.724  | 10 out of 14               |
| ECFP_6                                 | 738938915   | <br><chem>[*]C(=[*])N[c]1:[cH]:[cH]:[*]:[cH]:[cH]:[cH]:1</chem> | 0.617  | 2 out of 2                 |
| ECFP_6                                 | -177077903  | <br><chem>[*]N[c](:[cH]:[*]):[cH]:[*]</chem>                    | 0.279  | 4 out of 9                 |
| Top Features for negative contribution |             |                                                                                                                                                    |        |                            |
| Fingerprint                            | Bit/Smiles  | Feature Structure                                                                                                                                  | Score  | Carcinogen in training set |
| ECFP_6                                 | -175021654  | <br><chem>[*]N([*])[c](:[cH]:[*]):[cH]:[*]</chem>              | -0.805 | 0 out of 4                 |
| ECFP_6                                 | 2013347047  | <br><chem>[*][c]1:[*]:n:[cH]:[cH]:[cH]:1</chem>               | -0.805 | 0 out of 4                 |

|        |           |                                                                                                             |        |            |
|--------|-----------|-------------------------------------------------------------------------------------------------------------|--------|------------|
| ECFP_6 | 129482634 | 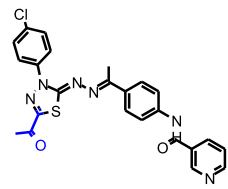 <p>[*]C(=[*])C(=O)C</p> | -0.657 | 0 out of 3 |
|--------|-----------|-------------------------------------------------------------------------------------------------------------|--------|------------|

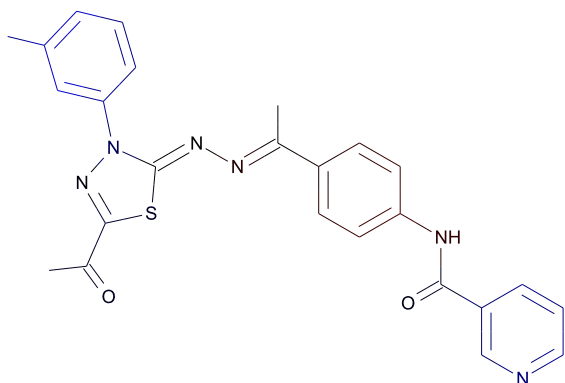

$C_{25}H_{22}N_6O_2S$

Molecular Weight: 470.54617

ALogP: 4.08

Rotatable Bonds: 6

Acceptors: 8

Donors: 1

## Model Prediction

Prediction: Non-Carcinogen

Probability: 0.214

Enrichment: 0.668

Bayesian Score: -8.94

Mahalanobis Distance: 14

Mahalanobis Distance p-value: 1.35e-005

Prediction: Positive if the Bayesian score is above the estimated best cutoff value from minimizing the false positive and false negative rate.

Probability: The estimated probability that the sample is in the positive category. This assumes that the Bayesian score follows a normal distribution and is different from the prediction using a cutoff.

Enrichment: An estimate of enrichment, that is, the increased likelihood (versus random) of this sample being in the category.

Bayesian Score: The standard Laplacian-modified Bayesian score.

Mahalanobis Distance: The Mahalanobis distance (MD) is the distance to the center of the training data. The larger the MD, the less trustworthy the prediction.

Mahalanobis Distance p-value: The p-value gives the fraction of training data with an MD greater than or equal to the one for the given sample, assuming normally distributed data. The smaller the p-value, the less trustworthy the prediction. For highly non-normal X properties (e.g., fingerprints), the MD p-value is wildly inaccurate.

## Structural Similar Compounds

| Name               | Moricizine                                                          | Fluticasone                                                         | Doxazosin                                                           |
|--------------------|---------------------------------------------------------------------|---------------------------------------------------------------------|---------------------------------------------------------------------|
| Structure          |                                                                     |                                                                     |                                                                     |
| Actual Endpoint    | Carcinogen                                                          | Non-Carcinogen                                                      | Non-Carcinogen                                                      |
| Predicted Endpoint | Carcinogen                                                          | Non-Carcinogen                                                      | Non-Carcinogen                                                      |
| Distance           | 0.656                                                               | 0.667                                                               | 0.676                                                               |
| Reference          | US FDA (Centre for Drug Eval.& Res./Off. Testing & Res.) Sept. 1997 | US FDA (Centre for Drug Eval.& Res./Off. Testing & Res.) Sept. 1997 | US FDA (Centre for Drug Eval.& Res./Off. Testing & Res.) Sept. 1997 |

## Model Applicability

Unknown features are fingerprint features in the query molecule, but not found or appearing too infrequently in the training set.

1. All properties and OPS components are within expected ranges.
2. Unknown ECFP\_2 feature: 128986386: [\*]N=C(/C)[c](:[\*]):[\*]
3. Unknown ECFP\_2 feature: 562081661: [\*]C(=NN=[\*])[\*]
4. Unknown ECFP\_2 feature: -819426257: [\*]C(=NN=[\*])[\*]
5. Unknown ECFP\_2 feature: 189949281: [\*]N=C\1/S[\*]=[\*]N1[\*]
6. Unknown ECFP\_2 feature: -1110911409: [\*]=C1[\*][\*]=NN1[c](:[\*]):[\*]
7. Unknown ECFP\_2 feature: -934225701: [\*]C(=[\*])C1=N[\*][\*]S1

## Feature Contribution

### Top features for positive contribution

| Fingerprint | Bit/Smiles | Feature Structure | Score | Carcinogen in training set |
|-------------|------------|-------------------|-------|----------------------------|
|-------------|------------|-------------------|-------|----------------------------|

| ECFP_6                                 | -1087070950 | 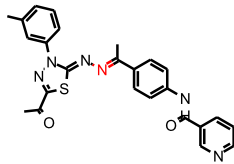<br><chem>[*]N=[*]</chem>                                       | 0.724  | 10 out of 14               |
|----------------------------------------|-------------|----------------------------------------------------------------------------------------------------------------------------------------------------|--------|----------------------------|
| ECFP_6                                 | 738938915   | <br><chem>[*]C(=[*])N[c]1:[cH]:[cH]:[*]:[cH]:[cH]:[cH]:1</chem> | 0.617  | 2 out of 2                 |
| ECFP_6                                 | -177077903  | <br><chem>[*]N[c](:[cH]:[*]):[cH]:[*]</chem>                    | 0.279  | 4 out of 9                 |
| Top Features for negative contribution |             |                                                                                                                                                    |        |                            |
| Fingerprint                            | Bit/Smiles  | Feature Structure                                                                                                                                  | Score  | Carcinogen in training set |
| ECFP_6                                 | -179515162  | <br><chem>[*]:[cH]:[c](C):[cH]:[*]</chem>                     | -1.41  | 0 out of 10                |
| ECFP_6                                 | -175021654  | <br><chem>[*]N([*])[c](:[cH]:[*]):[cH]:[*]</chem>             | -0.805 | 0 out of 4                 |

ECFP\_6

2013347047

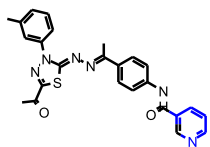

[\*][c]1:[\*]:n:[cH]:[c  
H]:[cH]:1

-0.805

0 out of 4

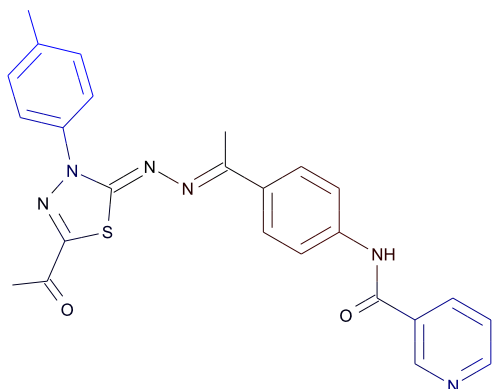

$C_{25}H_{22}N_6O_2S$

Molecular Weight: 470.54617

ALogP: 4.08

Rotatable Bonds: 6

Acceptors: 8

Donors: 1

## Model Prediction

Prediction: Non-Carcinogen

Probability: 0.226

Enrichment: 0.706

Bayesian Score: -10.3

Mahalanobis Distance: 13.6

Mahalanobis Distance p-value: 6.08e-005

Prediction: Positive if the Bayesian score is above the estimated best cutoff value from minimizing the false positive and false negative rate.

Probability: The estimated probability that the sample is in the positive category. This assumes that the Bayesian score follows a normal distribution and is different from the prediction using a cutoff.

Enrichment: An estimate of enrichment, that is, the increased likelihood (versus random) of this sample being in the category.

Bayesian Score: The standard Laplacian-modified Bayesian score.

Mahalanobis Distance: The Mahalanobis distance (MD) is the distance to the center of the training data. The larger the MD, the less trustworthy the prediction.

Mahalanobis Distance p-value: The p-value gives the fraction of training data with an MD greater than or equal to the one for the given sample, assuming normally distributed data. The smaller the p-value, the less trustworthy the prediction. For highly non-normal X properties (e.g., fingerprints), the MD p-value is wildly inaccurate.

## Structural Similar Compounds

| Name               | Moricizine                                                          | Fluticasone                                                         | Doxazosin                                                           |
|--------------------|---------------------------------------------------------------------|---------------------------------------------------------------------|---------------------------------------------------------------------|
| Structure          |                                                                     |                                                                     |                                                                     |
| Actual Endpoint    | Carcinogen                                                          | Non-Carcinogen                                                      | Non-Carcinogen                                                      |
| Predicted Endpoint | Carcinogen                                                          | Non-Carcinogen                                                      | Non-Carcinogen                                                      |
| Distance           | 0.658                                                               | 0.666                                                               | 0.679                                                               |
| Reference          | US FDA (Centre for Drug Eval.& Res./Off. Testing & Res.) Sept. 1997 | US FDA (Centre for Drug Eval.& Res./Off. Testing & Res.) Sept. 1997 | US FDA (Centre for Drug Eval.& Res./Off. Testing & Res.) Sept. 1997 |

## Model Applicability

Unknown features are fingerprint features in the query molecule, but not found or appearing too infrequently in the training set.

1. All properties and OPS components are within expected ranges.
2. Unknown ECFP\_2 feature: 128986386: [\*]N=C(/C)[c](:[\*]):[\*]
3. Unknown ECFP\_2 feature: 562081661: [\*]C(=NN=[\*])[\*]
4. Unknown ECFP\_2 feature: -819426257: [\*]C(=NN=[\*])[\*]
5. Unknown ECFP\_2 feature: 189949281: [\*]N=C\1/S[\*]=[\*]N1[\*]
6. Unknown ECFP\_2 feature: -1110911409: [\*]=C1[\*][\*]=NN1[c](:[\*]):[\*]
7. Unknown ECFP\_2 feature: -934225701: [\*]C(=[\*])C1=N[\*][\*]S1

## Feature Contribution

### Top features for positive contribution

| Fingerprint | Bit/Smiles | Feature Structure | Score | Carcinogen in training set |
|-------------|------------|-------------------|-------|----------------------------|
|-------------|------------|-------------------|-------|----------------------------|

| ECFP_6                                 | -1087070950 | 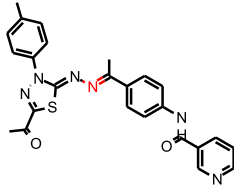<br><chem>[*]N=[*]</chem>                                  | 0.724 | 10 out of 14               |
|----------------------------------------|-------------|-----------------------------------------------------------------------------------------------------------------------------------------------|-------|----------------------------|
| ECFP_6                                 | 738938915   | <br><chem>[*]C(=[*])N[c]1:[cH]:[cH]:[*]:[cH]:[cH]:1</chem> | 0.617 | 2 out of 2                 |
| ECFP_6                                 | -177077903  | <br><chem>[*]N[c](:[cH]:[*]):[cH]:[cH]:[*]</chem>          | 0.279 | 4 out of 9                 |
| Top Features for negative contribution |             |                                                                                                                                               |       |                            |
| Fingerprint                            | Bit/Smiles  | Feature Structure                                                                                                                             | Score | Carcinogen in training set |
| ECFP_6                                 | -179515162  | <br><chem>[*]:[cH]:[c](C):[cH]:[*]</chem>                 | -1.41 | 0 out of 10                |
| ECFP_6                                 | -210573707  | <br><chem>[*][c]1:[*]:[cH]:[c](C):[cH]:[cH]:1</chem>     | -1.25 | 0 out of 8                 |

ECFP\_6

-533780882

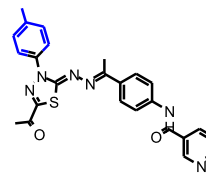

C[c]1:[cH]:[cH]:[\*]:[  
cH]:[cH]:1

-1.05

0 out of 6



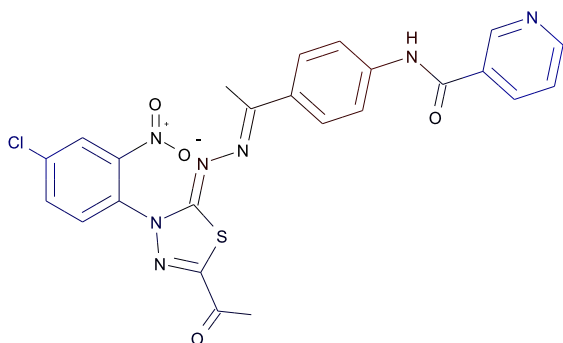

$C_{24}H_{18}ClN_7O_4S$

Molecular Weight: 535.96222

ALogP: 4.153

Rotatable Bonds: 7

Acceptors: 10

Donors: 1

## Model Prediction

Prediction: Non-Carcinogen

Probability: 0.209

Enrichment: 0.652

Bayesian Score: -8.12

Mahalanobis Distance: 16.1

Mahalanobis Distance p-value: 1.72e-009

Prediction: Positive if the Bayesian score is above the estimated best cutoff value from minimizing the false positive and false negative rate.

Probability: The estimated probability that the sample is in the positive category. This assumes that the Bayesian score follows a normal distribution and is different from the prediction using a cutoff.

Enrichment: An estimate of enrichment, that is, the increased likelihood (versus random) of this sample being in the category.

Bayesian Score: The standard Laplacian-modified Bayesian score.

Mahalanobis Distance: The Mahalanobis distance (MD) is the distance to the center of the training data. The larger the MD, the less trustworthy the prediction.

Mahalanobis Distance p-value: The p-value gives the fraction of training data with an MD greater than or equal to the one for the given sample, assuming normally distributed data. The smaller the p-value, the less trustworthy the prediction. For highly non-normal X properties (e.g., fingerprints), the MD p-value is wildly inaccurate.

## Structural Similar Compounds

| Name               | Doxazosin                                                           | Reserpine                                                           | Nicardipine                                                         |
|--------------------|---------------------------------------------------------------------|---------------------------------------------------------------------|---------------------------------------------------------------------|
| Structure          |                                                                     |                                                                     |                                                                     |
| Actual Endpoint    | Non-Carcinogen                                                      | Carcinogen                                                          | Non-Carcinogen                                                      |
| Predicted Endpoint | Non-Carcinogen                                                      | Carcinogen                                                          | Non-Carcinogen                                                      |
| Distance           | 0.778                                                               | 0.802                                                               | 0.820                                                               |
| Reference          | US FDA (Centre for Drug Eval.& Res./Off. Testing & Res.) Sept. 1997 | US FDA (Centre for Drug Eval.& Res./Off. Testing & Res.) Sept. 1997 | US FDA (Centre for Drug Eval.& Res./Off. Testing & Res.) Sept. 1997 |

## Model Applicability

Unknown features are fingerprint features in the query molecule, but not found or appearing too infrequently in the training set.

1. All properties and OPS components are within expected ranges.
2. Unknown ECFP\_2 feature: 1043790491: [\*][N+](=[\*])[\*]
3. Unknown ECFP\_2 feature: 781519895: [\*][O-]
4. Unknown ECFP\_2 feature: -934225701: [\*]C(=[\*])C1=N[\*][\*]S1
5. Unknown ECFP\_2 feature: -1110911409: [\*]=C1[\*][\*]=NN1[c](:[\*]):[\*]
6. Unknown ECFP\_2 feature: 189949281: [\*]N=C\1/S[\*]=[\*]N1[\*]
7. Unknown ECFP\_2 feature: -1956535100: [\*][c](:[\*]):[c](:[cH]:[\*])[N+](=[\*])[\*]
8. Unknown ECFP\_2 feature: -819426257: [\*]C(=NN=[\*])[\*]
9. Unknown ECFP\_2 feature: 562081661: [\*]C(=NN=[\*])[\*]
10. Unknown ECFP\_2 feature: 128986386: [\*]N=C(/C)\[c](:[\*]):[\*]
11. Unknown ECFP\_2 feature: -215026467: [\*]:[c](:[\*])[N+](=O)[O-]
12. Unknown ECFP\_2 feature: 2104376220: [\*][N+](=O)[\*]
13. Unknown ECFP\_2 feature: -659271057: [\*][N+](=[\*])[O-]

## Feature Contribution

### Top features for positive contribution

| Fingerprint | Bit/Smiles | Feature Structure | Score | Carcinogen in training set |
|-------------|------------|-------------------|-------|----------------------------|
|             |            |                   |       |                            |

| ECFP_6                                 | -1087070950 | 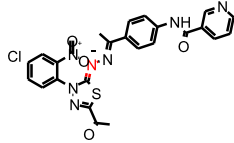<br><chem>[*]N=[*]</chem>                                  | 0.724  | 10 out of 14               |
|----------------------------------------|-------------|-----------------------------------------------------------------------------------------------------------------------------------------------|--------|----------------------------|
| ECFP_6                                 | 738938915   | <br><chem>[*]C(=[*])N[c]1:[cH]:[cH]:[*]:[cH]:[cH]:1</chem> | 0.617  | 2 out of 2                 |
| ECFP_6                                 | -177077903  | <br><chem>[*]N[c](:[cH]:[*]):[cH]:[*]</chem>               | 0.279  | 4 out of 9                 |
| Top Features for negative contribution |             |                                                                                                                                               |        |                            |
| Fingerprint                            | Bit/Smiles  | Feature Structure                                                                                                                             | Score  | Carcinogen in training set |
| ECFP_6                                 | 2013347047  | <br><chem>[*][c]1:[*]:n:[cH]:[cH]:[cH]:1</chem>          | -0.805 | 0 out of 4                 |
| ECFP_6                                 | 129482634   | <br><chem>[*]C(=[*])C(=O)C</chem>                        | -0.657 | 0 out of 3                 |

|        |           |                                                                                                             |        |            |
|--------|-----------|-------------------------------------------------------------------------------------------------------------|--------|------------|
| ECFP_6 | 912478223 | 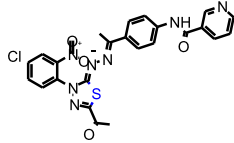<br><chem>[*]S[*]</chem> | -0.638 | 1 out of 9 |
|--------|-----------|-------------------------------------------------------------------------------------------------------------|--------|------------|

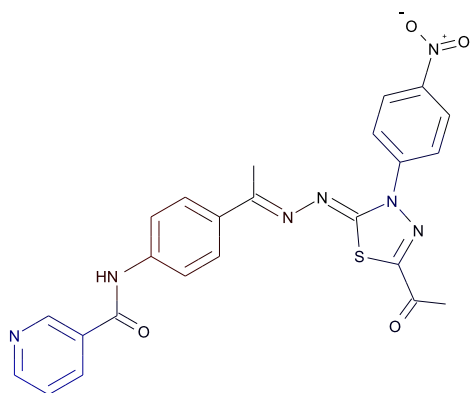

$C_{24}H_{19}N_7O_4S$

Molecular Weight: 501.51715

ALogP: 3.488

Rotatable Bonds: 7

Acceptors: 10

Donors: 1

## Model Prediction

Prediction: Non-Carcinogen

Probability: 0.205

Enrichment: 0.639

Bayesian Score: -6.25

Mahalanobis Distance: 14.3

Mahalanobis Distance p-value: 5.32e-006

Prediction: Positive if the Bayesian score is above the estimated best cutoff value from minimizing the false positive and false negative rate.

Probability: The estimated probability that the sample is in the positive category. This assumes that the Bayesian score follows a normal distribution and is different from the prediction using a cutoff.

Enrichment: An estimate of enrichment, that is, the increased likelihood (versus random) of this sample being in the category.

Bayesian Score: The standard Laplacian-modified Bayesian score.

Mahalanobis Distance: The Mahalanobis distance (MD) is the distance to the center of the training data. The larger the MD, the less trustworthy the prediction.

Mahalanobis Distance p-value: The p-value gives the fraction of training data with an MD greater than or equal to the one for the given sample, assuming normally distributed data. The smaller the p-value, the less trustworthy the prediction. For highly non-normal X properties (e.g., fingerprints), the MD p-value is wildly inaccurate.

## Structural Similar Compounds

| Name               | Doxazosin                                                           | Bacampicillin                                                       | Nimodipine                                                          |
|--------------------|---------------------------------------------------------------------|---------------------------------------------------------------------|---------------------------------------------------------------------|
| Structure          |                                                                     |                                                                     |                                                                     |
| Actual Endpoint    | Non-Carcinogen                                                      | Non-Carcinogen                                                      | Non-Carcinogen                                                      |
| Predicted Endpoint | Non-Carcinogen                                                      | Non-Carcinogen                                                      | Non-Carcinogen                                                      |
| Distance           | 0.737                                                               | 0.782                                                               | 0.794                                                               |
| Reference          | US FDA (Centre for Drug Eval.& Res./Off. Testing & Res.) Sept. 1997 | US FDA (Centre for Drug Eval.& Res./Off. Testing & Res.) Sept. 1997 | US FDA (Centre for Drug Eval.& Res./Off. Testing & Res.) Sept. 1997 |

## Model Applicability

Unknown features are fingerprint features in the query molecule, but not found or appearing too infrequently in the training set.

1. All properties and OPS components are within expected ranges.
2. Unknown ECFP\_2 feature: 1043790491: [\*][N+](=[\*])[\*]
3. Unknown ECFP\_2 feature: 781519895: [\*][O-]
4. Unknown ECFP\_2 feature: 128986386: [\*]N=C(/C)[c](:[\*]):[\*]
5. Unknown ECFP\_2 feature: 562081661: [\*]C(=NN=[\*])[\*]
6. Unknown ECFP\_2 feature: -819426257: [\*]C(=NN=[\*])[\*]
7. Unknown ECFP\_2 feature: -179073144: [\*][N+](=[\*])[c](:[cH]:[\*]):[cH]:[\*]
8. Unknown ECFP\_2 feature: 189949281: [\*]N=C\1/S[\*]=[\*]N1[\*]
9. Unknown ECFP\_2 feature: -1110911409: [\*]=C1[\*][\*]=NN1[c](:[\*]):[\*]
10. Unknown ECFP\_2 feature: -934225701: [\*]C(=[\*])C1=N[\*][\*]S1
11. Unknown ECFP\_2 feature: -215026467: [\*]:[c](:[\*])[N+](=O)[O-]
12. Unknown ECFP\_2 feature: 2104376220: [\*][N+](=O)[\*]
13. Unknown ECFP\_2 feature: -659271057: [\*][N+](=[\*])[O-]

## Feature Contribution

### Top features for positive contribution

| Fingerprint | Bit/Smiles | Feature Structure | Score | Carcinogen in training set |
|-------------|------------|-------------------|-------|----------------------------|
|             |            |                   |       |                            |

|                                        |             |                                                                                                                                                    |        |                            |
|----------------------------------------|-------------|----------------------------------------------------------------------------------------------------------------------------------------------------|--------|----------------------------|
| ECFP_6                                 | -1087070950 | 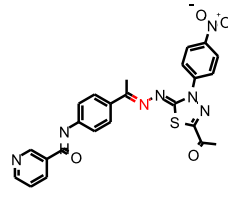<br><chem>[*]N=[*]</chem>                                       | 0.724  | 10 out of 14               |
| ECFP_6                                 | 738938915   | <br><chem>[*]C(=[*])N[c]1:[cH]:[cH]:[*]:[cH]:[cH]:[cH]:1</chem> | 0.617  | 2 out of 2                 |
| ECFP_6                                 | -177077903  | <br><chem>[*]N[c](:[cH]:[*]):[cH]:[*]</chem>                    | 0.279  | 4 out of 9                 |
| Top Features for negative contribution |             |                                                                                                                                                    |        |                            |
| Fingerprint                            | Bit/Smiles  | Feature Structure                                                                                                                                  | Score  | Carcinogen in training set |
| ECFP_6                                 | 2013347047  | <br><chem>[*][c]1:[*]:n:[cH]:[cH]:[cH]:1</chem>                | -0.805 | 0 out of 4                 |
| ECFP_6                                 | -175021654  | <br><chem>[*]N([*])[c](:[cH]:[*]):[cH]:[*]</chem>             | -0.805 | 0 out of 4                 |

|        |           |                                                                                                                     |        |            |
|--------|-----------|---------------------------------------------------------------------------------------------------------------------|--------|------------|
| ECFP_6 | 129482634 | 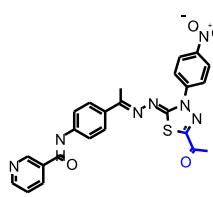<br><chem>[*]C(=[*])C(=O)C</chem> | -0.657 | 0 out of 3 |
|--------|-----------|---------------------------------------------------------------------------------------------------------------------|--------|------------|

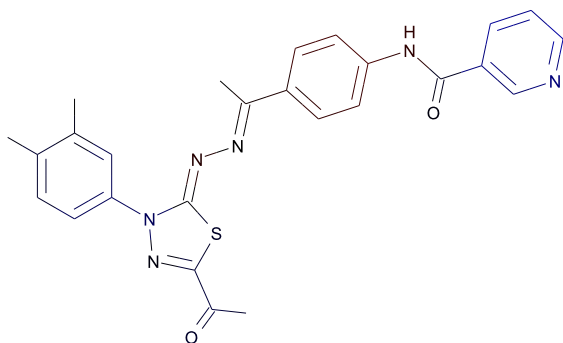

$C_{26}H_{24}N_6O_2S$

Molecular Weight: 484.57275

ALogP: 4.566

Rotatable Bonds: 6

Acceptors: 8

Donors: 1

## Model Prediction

Prediction: Non-Carcinogen

Probability: 0.205

Enrichment: 0.641

Bayesian Score: -5.58

Mahalanobis Distance: 14.1

Mahalanobis Distance p-value: 1.02e-005

Prediction: Positive if the Bayesian score is above the estimated best cutoff value from minimizing the false positive and false negative rate.

Probability: The estimated probability that the sample is in the positive category. This assumes that the Bayesian score follows a normal distribution and is different from the prediction using a cutoff.

Enrichment: An estimate of enrichment, that is, the increased likelihood (versus random) of this sample being in the category.

Bayesian Score: The standard Laplacian-modified Bayesian score.

Mahalanobis Distance: The Mahalanobis distance (MD) is the distance to the center of the training data. The larger the MD, the less trustworthy the prediction.

Mahalanobis Distance p-value: The p-value gives the fraction of training data with an MD greater than or equal to the one for the given sample, assuming normally distributed data. The smaller the p-value, the less trustworthy the prediction. For highly non-normal X properties (e.g., fingerprints), the MD p-value is wildly inaccurate.

## Structural Similar Compounds

| Name               | Fluticasone                                                         | Moricizine                                                          | Doxazosin                                                           |
|--------------------|---------------------------------------------------------------------|---------------------------------------------------------------------|---------------------------------------------------------------------|
| Structure          |                                                                     |                                                                     |                                                                     |
| Actual Endpoint    | Non-Carcinogen                                                      | Carcinogen                                                          | Non-Carcinogen                                                      |
| Predicted Endpoint | Non-Carcinogen                                                      | Carcinogen                                                          | Non-Carcinogen                                                      |
| Distance           | 0.663                                                               | 0.686                                                               | 0.713                                                               |
| Reference          | US FDA (Centre for Drug Eval.& Res./Off. Testing & Res.) Sept. 1997 | US FDA (Centre for Drug Eval.& Res./Off. Testing & Res.) Sept. 1997 | US FDA (Centre for Drug Eval.& Res./Off. Testing & Res.) Sept. 1997 |

## Model Applicability

Unknown features are fingerprint features in the query molecule, but not found or appearing too infrequently in the training set.

1. All properties and OPS components are within expected ranges.
2. Unknown ECFP\_2 feature: -934225701: [\*]C(=[\*])C1=N[\*][\*]S1
3. Unknown ECFP\_2 feature: -1110911409: [\*]=C1[\*][\*]=NN1[c](:[\*]):[\*]
4. Unknown ECFP\_2 feature: 189949281: [\*]N=C\1/S[\*]=[\*]N1[\*]
5. Unknown ECFP\_2 feature: -819426257: [\*]C(=NN=[\*])[\*]
6. Unknown ECFP\_2 feature: 562081661: [\*]C(=NN=[\*])[\*]
7. Unknown ECFP\_2 feature: 128986386: [\*]N=C(/C)[c](:[\*]):[\*]

## Feature Contribution

### Top features for positive contribution

| Fingerprint | Bit/Smiles | Feature Structure | Score | Carcinogen in training set |
|-------------|------------|-------------------|-------|----------------------------|
|-------------|------------|-------------------|-------|----------------------------|

| ECFP_6                                 | -1087070950 | 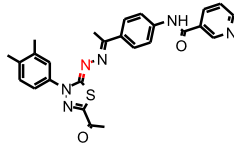<br>[*]N=[*]                                       | 0.724  | 10 out of 14               |
|----------------------------------------|-------------|---------------------------------------------------------------------------------------------------------------------------------------|--------|----------------------------|
| ECFP_6                                 | 738938915   | <br>[*]C(=[*])N[c]1:[cH]:[cH]:[*]:[cH]:[cH]:[cH]:1 | 0.617  | 2 out of 2                 |
| ECFP_6                                 | -177077903  | <br>[*]N[c](:[cH]:[*]):[cH]:[*]                    | 0.279  | 4 out of 9                 |
| Top Features for negative contribution |             |                                                                                                                                       |        |                            |
| Fingerprint                            | Bit/Smiles  | Feature Structure                                                                                                                     | Score  | Carcinogen in training set |
| ECFP_6                                 | -175021654  | <br>[*]N([*])[c](:[cH]:[*]):[cH]:[*]             | -0.805 | 0 out of 4                 |
| ECFP_6                                 | 2013347047  | <br>[*][c]1:[*]:n:[cH]:[cH]:[cH]:1               | -0.805 | 0 out of 4                 |



|        |           |                                                                                                                      |        |            |
|--------|-----------|----------------------------------------------------------------------------------------------------------------------|--------|------------|
| ECFP_6 | 129482634 | 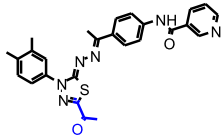<br><chem>[*]C(=[*])C(=O)C</chem> | -0.657 | 0 out of 3 |
|--------|-----------|----------------------------------------------------------------------------------------------------------------------|--------|------------|

# Sorafenib

# TOPKAT\_Mouse\_Female\_FDA\_None\_vs\_Carcinogen

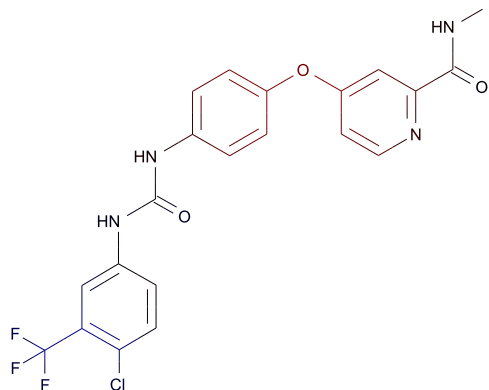

C<sub>21</sub>H<sub>16</sub>ClF<sub>3</sub>N<sub>4</sub>O<sub>3</sub>

Molecular Weight: 464.82494

ALogP: 4.175

Rotatable Bonds: 6

Acceptors: 4

Donors: 3

## Model Prediction

Prediction: Carcinogen

Probability: 0.257

Enrichment: 0.801

Bayesian Score: -0.321

Mahalanobis Distance: 14.9

Mahalanobis Distance p-value: 4.21e-007

Prediction: Positive if the Bayesian score is above the estimated best cutoff value from minimizing the false positive and false negative rate.

Probability: The estimated probability that the sample is in the positive category. This assumes that the Bayesian score follows a normal distribution and is different from the prediction using a cutoff.

Enrichment: An estimate of enrichment, that is, the increased likelihood (versus random) of this sample being in the category.

Bayesian Score: The standard Laplacian-modified Bayesian score.

Mahalanobis Distance: The Mahalanobis distance (MD) is the distance to the center of the training data. The larger the MD, the less trustworthy the prediction.

Mahalanobis Distance p-value: The p-value gives the fraction of training data with an MD greater than or equal to the one for the given sample, assuming normally distributed data. The smaller the p-value, the less trustworthy the prediction. For highly non-normal X properties (e.g., fingerprints), the MD p-value is wildly inaccurate.

## Structural Similar Compounds

| Name               | Glimepiride                                                         | Glyburide                                                           | Fluvastatin                                                         |
|--------------------|---------------------------------------------------------------------|---------------------------------------------------------------------|---------------------------------------------------------------------|
| Structure          |                                                                     |                                                                     |                                                                     |
| Actual Endpoint    | Carcinogen                                                          | Non-Carcinogen                                                      | Non-Carcinogen                                                      |
| Predicted Endpoint | Carcinogen                                                          | Non-Carcinogen                                                      | Non-Carcinogen                                                      |
| Distance           | 0.605                                                               | 0.615                                                               | 0.625                                                               |
| Reference          | US FDA (Centre for Drug Eval.& Res./Off. Testing & Res.) Sept. 1997 | US FDA (Centre for Drug Eval.& Res./Off. Testing & Res.) Sept. 1997 | US FDA (Centre for Drug Eval.& Res./Off. Testing & Res.) Sept. 1997 |

## Model Applicability

Unknown features are fingerprint features in the query molecule, but not found or appearing too infrequently in the training set.

1. OPS PC20 out of range. Value: -3.3309. Training min, max, SD, explained variance: -3.1862, 4.4571, 1.28, 0.0167.

## Feature Contribution

| Top features for positive contribution |            |                   |       |                            |
|----------------------------------------|------------|-------------------|-------|----------------------------|
| Fingerprint                            | Bit/Smiles | Feature Structure | Score | Carcinogen in training set |
| ECFP_6                                 | 738938915  |                   | 0.617 | 2 out of 2                 |

[\*]C(=[\*])N[c]1:[cH]:  
[cH]:[\*]:[cH]:[cH]:1

|                                        |            |                                                                                                                                                |        |                            |
|----------------------------------------|------------|------------------------------------------------------------------------------------------------------------------------------------------------|--------|----------------------------|
| ECFP_6                                 | 1338334141 | 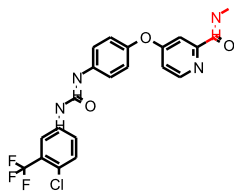<br><chem>[*]C(=[*])NC</chem>                                | 0.442  | 2 out of 3                 |
| ECFP_6                                 | 1305253718 | <br><chem>[*]:[c](:[*])O[c](:[*])</chem>                    | 0.424  | 1 out of 1                 |
| Top Features for negative contribution |            |                                                                                                                                                |        |                            |
| Fingerprint                            | Bit/Smiles | Feature Structure                                                                                                                              | Score  | Carcinogen in training set |
| ECFP_6                                 | 1335691903 | <br><chem>[*][c](:[*]):[c](Cl):[cH]:[*]</chem>              | -0.669 | 3 out of 22                |
| ECFP_6                                 | 1336678434 | <br><chem>[*][c](:[*]):[c](:[cH]):[*]C([*])([*])[*]</chem> | -0.657 | 0 out of 3                 |
| ECFP_6                                 | 1952889961 | <br><chem>[*]:[c](:[*])C(F)(F)F</chem>                    | -0.657 | 0 out of 3                 |

# Sorafenib

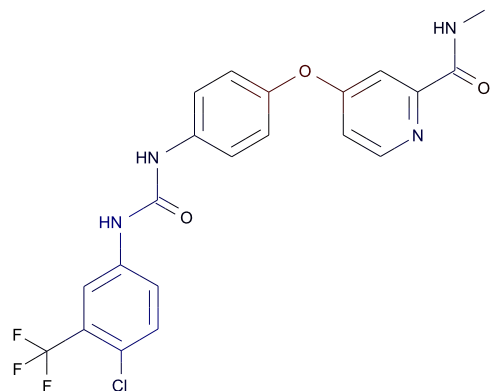

$C_{21}H_{16}ClF_3N_4O_3$

Molecular Weight: 464.82494

ALogP: 4.175

Rotatable Bonds: 6

Acceptors: 4

Donors: 3

## Model Prediction

Prediction: Single-Carcinogen

Probability: 0.283

Enrichment: 0.691

Bayesian Score: -3.89

Mahalanobis Distance: 11.1

Mahalanobis Distance p-value: 0.00221

Prediction: Positive if the Bayesian score is above the estimated best cutoff value from minimizing the false positive and false negative rate.

Probability: The estimated probability that the sample is in the positive category. This assumes that the Bayesian score follows a normal distribution and is different from the prediction using a cutoff.

Enrichment: An estimate of enrichment, that is, the increased likelihood (versus random) of this sample being in the category.

Bayesian Score: The standard Laplacian-modified Bayesian score.

Mahalanobis Distance: The Mahalanobis distance (MD) is the distance to the center of the training data. The larger the MD, the less trustworthy the prediction.

Mahalanobis Distance p-value: The p-value gives the fraction of training data with an MD greater than or equal to the one for the given sample, assuming normally distributed data. The smaller the p-value, the less trustworthy the prediction. For highly non-normal X properties (e.g., fingerprints), the MD p-value is wildly inaccurate.

# TOPKAT\_Mouse\_Female\_FDA\_Single\_vs\_Multiple

## Structural Similar Compounds

| Name               | Glimepiride                                                         | Labetalol                                                           | Lansoprazole                                                        |
|--------------------|---------------------------------------------------------------------|---------------------------------------------------------------------|---------------------------------------------------------------------|
| Structure          |                                                                     |                                                                     |                                                                     |
| Actual Endpoint    | Single-Carcinogen                                                   | Single-Carcinogen                                                   | Single-Carcinogen                                                   |
| Predicted Endpoint | Single-Carcinogen                                                   | Single-Carcinogen                                                   | Single-Carcinogen                                                   |
| Distance           | 0.599                                                               | 0.808                                                               | 0.820                                                               |
| Reference          | US FDA (Centre for Drug Eval.& Res./Off. Testing & Res.) Sept. 1997 | US FDA (Centre for Drug Eval.& Res./Off. Testing & Res.) Sept. 1997 | US FDA (Centre for Drug Eval.& Res./Off. Testing & Res.) Sept. 1997 |

## Model Applicability

Unknown features are fingerprint features in the query molecule, but not found or appearing too infrequently in the training set.

1. All properties and OPS components are within expected ranges.
2. Unknown ECFP\_2 feature: 1336678434: [\*][c](:[\*]):[c](C([\*])([\*])([\*]):c:[\*])
3. Unknown ECFP\_2 feature: -1952889961: [\*]:[c](:[\*])C(F)(F)F

## Feature Contribution

### Top features for positive contribution

| Fingerprint | Bit/Smiles | Feature Structure                                       | Score | Multiple-Carcinogen in training set |
|-------------|------------|---------------------------------------------------------|-------|-------------------------------------|
| ECFP_4      | -834094296 | <br>[*]:[cH]:[c](O[c](:[c]H):[*]):[c]H):[*]):[c]H):[*]) | 0.351 | 1 out of 1                          |

|                                        |            |                                                                                                                                                        |        |                                     |
|----------------------------------------|------------|--------------------------------------------------------------------------------------------------------------------------------------------------------|--------|-------------------------------------|
| ECFP_4                                 | 1407472008 | 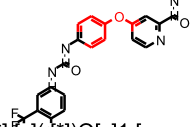<br><chem>[*].[c](c(*)O[c]1:[cH]:[cH]:[cH]:[cH]:1</chem>            | 0.351  | 1 out of 1                          |
| ECFP_4                                 | 143734695  | <br><chem>[*][c]1[c(*)]:[cH]:[cH]:[c](O[c](:[*]):[*]):[cH]:1</chem> | 0.351  | 1 out of 1                          |
| Top Features for negative contribution |            |                                                                                                                                                        |        |                                     |
| Fingerprint                            | Bit/Smiles | Feature Structure                                                                                                                                      | Score  | Multiple-Carcinogen in training set |
| ECFP_4                                 | 888054369  | <br><chem>[*]N[c]1:[cH]:[*]:[c]([*]):[cH]:[cH]:1</chem>             | -0.8   | 0 out of 3                          |
| ECFP_4                                 | 1335691903 | <br><chem>[*][c](:[*]):[c](Cl):[cH]:[*]</chem>                    | -0.8   | 0 out of 3                          |
| ECFP_4                                 | 1338334141 | <br><chem>[*]C(=[*])NC</chem>                                     | -0.597 | 0 out of 2                          |



7a

## TOPKAT\_Mouse\_Male\_FDA\_None\_vs\_Carcinogen

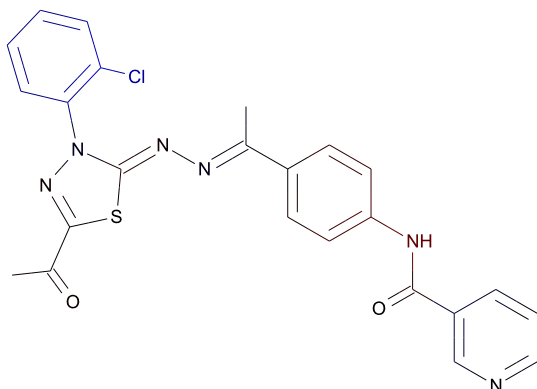C<sub>24</sub>H<sub>19</sub>ClN<sub>6</sub>O<sub>2</sub>S

Molecular Weight: 490.96466

ALogP: 4.258

Rotatable Bonds: 6

Acceptors: 8

Donors: 1

**Model Prediction**

Prediction: Non-Carcinogen

Probability: 0.229

Enrichment: 0.779

Bayesian Score: -3.3

Mahalanobis Distance: 18.4

Mahalanobis Distance p-value: 5.07e-015

Prediction: Positive if the Bayesian score is above the estimated best cutoff value from minimizing the false positive and false negative rate.

Probability: The estimated probability that the sample is in the positive category. This assumes that the Bayesian score follows a normal distribution and is different from the prediction using a cutoff.

Enrichment: An estimate of enrichment, that is, the increased likelihood (versus random) of this sample being in the category.

Bayesian Score: The standard Laplacian-modified Bayesian score.

Mahalanobis Distance: The Mahalanobis distance (MD) is the distance to the center of the training data. The larger the MD, the less trustworthy the prediction.

Mahalanobis Distance p-value: The p-value gives the fraction of training data with an MD greater than or equal to the one for the given sample, assuming normally distributed data. The smaller the p-value, the less trustworthy the prediction. For highly non-normal X properties (e.g., fingerprints), the MD p-value is wildly inaccurate.

**Structural Similar Compounds**

| Name               | Fluticasone                                                         | Moricizine                                                          | Doxazosin                                                           |
|--------------------|---------------------------------------------------------------------|---------------------------------------------------------------------|---------------------------------------------------------------------|
| Structure          |                                                                     |                                                                     |                                                                     |
| Actual Endpoint    | Non-Carcinogen                                                      | Non-Carcinogen                                                      | Non-Carcinogen                                                      |
| Predicted Endpoint | Carcinogen                                                          | Non-Carcinogen                                                      | Non-Carcinogen                                                      |
| Distance           | 0.645                                                               | 0.661                                                               | 0.680                                                               |
| Reference          | US FDA (Centre for Drug Eval.& Res./Off. Testing & Res.) Sept. 1997 | US FDA (Centre for Drug Eval.& Res./Off. Testing & Res.) Sept. 1997 | US FDA (Centre for Drug Eval.& Res./Off. Testing & Res.) Sept. 1997 |

**Model Applicability**

Unknown features are fingerprint features in the query molecule, but not found or appearing too infrequently in the training set.

1. OPS PC16 out of range. Value: -3.3134. Training min, max, SD, explained variance: -3.1219, 5.3717, 1.291, 0.0175.

**Feature Contribution**

| Top features for positive contribution |             |                                                        |       |                            |
|----------------------------------------|-------------|--------------------------------------------------------|-------|----------------------------|
| Fingerprint                            | Bit/Smiles  | Feature Structure                                      | Score | Carcinogen in training set |
| FCFP_6                                 | -1838187238 | <br><chem>[*]C(=[*])N[c]1:[cH]:[cH]:[cH]:[cH]:1</chem> | 0.565 | 4 out of 7                 |

|                                        |             |                                                                                                                                              |        |                            |
|----------------------------------------|-------------|----------------------------------------------------------------------------------------------------------------------------------------------|--------|----------------------------|
| FCFP_6                                 | 675799546   | 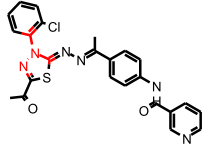<br><chem>[*]=C1[*][*]=NN1[c]([*]):[*]:[*]</chem>         | 0.46   | 1 out of 1                 |
| FCFP_6                                 | 1294255210  | <br><chem>[*]C(=[*])N[c]([*]):[*]:[*]</chem>              | 0.441  | 12 out of 28               |
| Top Features for negative contribution |             |                                                                                                                                              |        |                            |
| Fingerprint                            | Bit/Smiles  | Feature Structure                                                                                                                            | Score  | Carcinogen in training set |
| FCFP_6                                 | -2095752315 | <br><chem>[*][c]1:[cH]:[cH]:[cH]:[cH]:[cH]:[c]:1Cl</chem> | -1.13  | 0 out of 8                 |
| FCFP_6                                 | 1153798395  | <br><chem>[*]C(=[*])[c]1:[cH]:[*]:[cH]:n:[cH]:1</chem>   | -0.582 | 0 out of 3                 |
| FCFP_6                                 | -1549192822 | <br><chem>[*]N=C(/C)\c]([*]):[*]</chem>                 | -0.489 | 3 out of 21                |



7b

TOPKAT\_Mouse\_Male\_FDA\_None\_vs\_Carcinogen

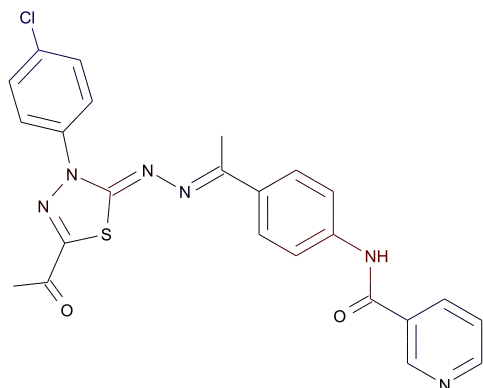C<sub>24</sub>H<sub>19</sub>ClN<sub>6</sub>O<sub>2</sub>S

Molecular Weight: 490.96465

ALogP: 4.258

Rotatable Bonds: 6

Acceptors: 8

Donors: 1

## Model Prediction

Prediction: Carcinogen

Probability: 0.281

Enrichment: 0.956

Bayesian Score: -0.944

Mahalanobis Distance: 18.1

Mahalanobis Distance p-value: 1.78e-014

Prediction: Positive if the Bayesian score is above the estimated best cutoff value from minimizing the false positive and false negative rate.

Probability: The estimated probability that the sample is in the positive category. This assumes that the Bayesian score follows a normal distribution and is different from the prediction using a cutoff.

Enrichment: An estimate of enrichment, that is, the increased likelihood (versus random) of this sample being in the category.

Bayesian Score: The standard Laplacian-modified Bayesian score.

Mahalanobis Distance: The Mahalanobis distance (MD) is the distance to the center of the training data. The larger the MD, the less trustworthy the prediction.

Mahalanobis Distance p-value: The p-value gives the fraction of training data with an MD greater than or equal to the one for the given sample, assuming normally distributed data. The smaller the p-value, the less trustworthy the prediction. For highly non-normal X properties (e.g., fingerprints), the MD p-value is wildly inaccurate.

## Structural Similar Compounds

| Name               | Fluticasone                                                         | Moricizine                                                          | Doxazosin                                                           |
|--------------------|---------------------------------------------------------------------|---------------------------------------------------------------------|---------------------------------------------------------------------|
| Structure          |                                                                     |                                                                     |                                                                     |
| Actual Endpoint    | Non-Carcinogen                                                      | Non-Carcinogen                                                      | Non-Carcinogen                                                      |
| Predicted Endpoint | Carcinogen                                                          | Non-Carcinogen                                                      | Non-Carcinogen                                                      |
| Distance           | 0.644                                                               | 0.670                                                               | 0.688                                                               |
| Reference          | US FDA (Centre for Drug Eval.& Res./Off. Testing & Res.) Sept. 1997 | US FDA (Centre for Drug Eval.& Res./Off. Testing & Res.) Sept. 1997 | US FDA (Centre for Drug Eval.& Res./Off. Testing & Res.) Sept. 1997 |

## Model Applicability

Unknown features are fingerprint features in the query molecule, but not found or appearing too infrequently in the training set.

1. All properties and OPS components are within expected ranges.

## Feature Contribution

### Top features for positive contribution

| Fingerprint | Bit/Smiles  | Feature Structure                                          | Score | Carcinogen in training set |
|-------------|-------------|------------------------------------------------------------|-------|----------------------------|
| FCFP_6      | -1838187238 | <br><chem>[*]C(=[*])N[c]1:[cH]:[cH]:[*]:[cH]:[cH]:1</chem> | 0.565 | 4 out of 7                 |

|                                        |             |                                                                                                                                                     |        |                            |
|----------------------------------------|-------------|-----------------------------------------------------------------------------------------------------------------------------------------------------|--------|----------------------------|
| FCFP_6                                 | -319371573  | 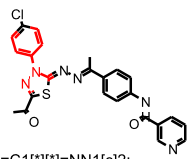<br><chem>[*]=C1[*][*]=NN1[c]2: [cH]:[cH]:[*]:[cH]:[cH]:2</chem> | 0.46   | 1 out of 1                 |
| FCFP_6                                 | 675799546   | <br><chem>[*]=C1[*][*]=NN1[c](: [*]):[*]</chem>                  | 0.46   | 1 out of 1                 |
| Top Features for negative contribution |             |                                                                                                                                                     |        |                            |
| Fingerprint                            | Bit/Smiles  | Feature Structure                                                                                                                                   | Score  | Carcinogen in training set |
| FCFP_6                                 | 1153798395  | <br><chem>[*]C(=[*])[c]1:[cH]:[*]:[cH]:n:[cH]:1</chem>           | -0.582 | 0 out of 3                 |
| FCFP_6                                 | -1549192822 | <br><chem>[*]N=C(/C)[c](:[*]):[*]</chem>                        | -0.489 | 3 out of 21                |
| FCFP_6                                 | 551850122   | <br><chem>[*][c]1:[*]:[cH]:[cH]:[cH]:[c]:1Cl</chem>            | -0.433 | 8 out of 49                |

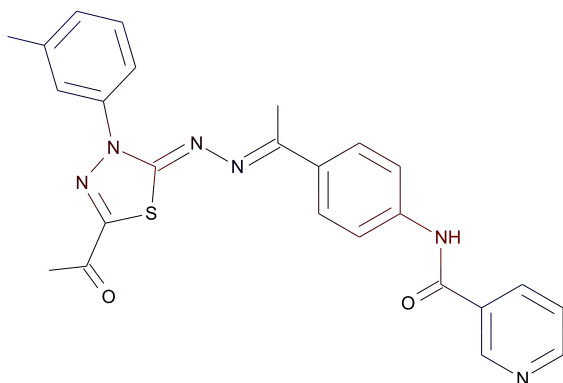

$C_{25}H_{22}N_6O_2S$

Molecular Weight: 470.54617

ALogP: 4.08

Rotatable Bonds: 6

Acceptors: 8

Donors: 1

## Model Prediction

Prediction: Carcinogen

Probability: 0.285

Enrichment: 0.968

Bayesian Score: -0.796

Mahalanobis Distance: 20.4

Mahalanobis Distance p-value: 8.37e-020

Prediction: Positive if the Bayesian score is above the estimated best cutoff value from minimizing the false positive and false negative rate.

Probability: The estimated probability that the sample is in the positive category. This assumes that the Bayesian score follows a normal distribution and is different from the prediction using a cutoff.

Enrichment: An estimate of enrichment, that is, the increased likelihood (versus random) of this sample being in the category.

Bayesian Score: The standard Laplacian-modified Bayesian score.

Mahalanobis Distance: The Mahalanobis distance (MD) is the distance to the center of the training data. The larger the MD, the less trustworthy the prediction.

Mahalanobis Distance p-value: The p-value gives the fraction of training data with an MD greater than or equal to the one for the given sample, assuming normally distributed data. The smaller the p-value, the less trustworthy the prediction. For highly non-normal X properties (e.g., fingerprints), the MD p-value is wildly inaccurate.

## Structural Similar Compounds

| Name               | Moricizine                                                          | Fluticasone                                                         | Doxazosin                                                           |
|--------------------|---------------------------------------------------------------------|---------------------------------------------------------------------|---------------------------------------------------------------------|
| Structure          |                                                                     |                                                                     |                                                                     |
| Actual Endpoint    | Non-Carcinogen                                                      | Non-Carcinogen                                                      | Non-Carcinogen                                                      |
| Predicted Endpoint | Non-Carcinogen                                                      | Carcinogen                                                          | Non-Carcinogen                                                      |
| Distance           | 0.642                                                               | 0.654                                                               | 0.664                                                               |
| Reference          | US FDA (Centre for Drug Eval.& Res./Off. Testing & Res.) Sept. 1997 | US FDA (Centre for Drug Eval.& Res./Off. Testing & Res.) Sept. 1997 | US FDA (Centre for Drug Eval.& Res./Off. Testing & Res.) Sept. 1997 |

## Model Applicability

Unknown features are fingerprint features in the query molecule, but not found or appearing too infrequently in the training set.

1. All properties and OPS components are within expected ranges.

## Feature Contribution

### Top features for positive contribution

| Fingerprint | Bit/Smiles  | Feature Structure                                          | Score | Carcinogen in training set |
|-------------|-------------|------------------------------------------------------------|-------|----------------------------|
| FCFP_6      | -1838187238 | <p>[*]C(=[*])N[c]1:[cH]:[cH]:[cH]:[*]:[cH]:[cH]:[cH]:1</p> | 0.565 | 4 out of 7                 |

|                                        |             |                                                                                                                                                    |        |                            |
|----------------------------------------|-------------|----------------------------------------------------------------------------------------------------------------------------------------------------|--------|----------------------------|
| FCFP_6                                 | -319371573  | 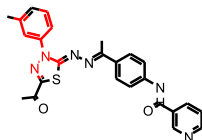<br>[*]=C1[*][*]=NN1[c]2:<br>[cH]:[cH]:[*]:[cH]:[<br>cH]:2      | 0.46   | 1 out of 1                 |
| FCFP_6                                 | -198775421  | <br>[*][c]1:[cH]:[cH]:[cH<br>]:[c](:[cH]:1)N2N=[*<br>][*]C2=[*] | 0.46   | 1 out of 1                 |
| Top Features for negative contribution |             |                                                                                                                                                    |        |                            |
| Fingerprint                            | Bit/Smiles  | Feature Structure                                                                                                                                  | Score  | Carcinogen in training set |
| FCFP_6                                 | -1773728142 | <br>[*][c]1:[*]:[cH]:[cH]<br>:[c](C):[cH]:1                     | -1.29  | 0 out of 10                |
| FCFP_6                                 | 1153798395  | <br>[*]C(=[*])[c]1:[cH]:[<br>*]:[cH]:n:[cH]:1                  | -0.582 | 0 out of 3                 |
| FCFP_6                                 | -1549192822 | <br>[*]N=C(/C)[c](:[*])<br>:[*]                               | -0.489 | 3 out of 21                |

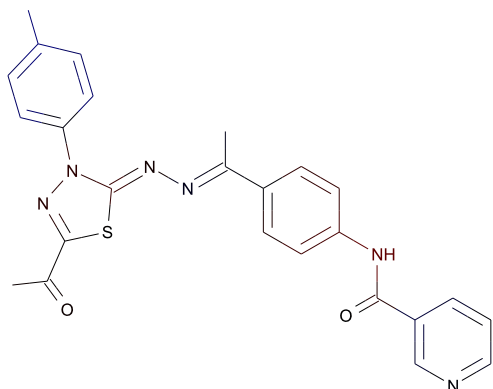

$C_{25}H_{22}N_6O_2S$

Molecular Weight: 470.54617

ALogP: 4.08

Rotatable Bonds: 6

Acceptors: 8

Donors: 1

## Model Prediction

**Prediction: Carcinogen**

Probability: 0.264

Enrichment: 0.896

Bayesian Score: -1.68

Mahalanobis Distance: 18.7

Mahalanobis Distance p-value: 7.74e-016

Prediction: Positive if the Bayesian score is above the estimated best cutoff value from minimizing the false positive and false negative rate.

Probability: The estimated probability that the sample is in the positive category. This assumes that the Bayesian score follows a normal distribution and is different from the prediction using a cutoff.

Enrichment: An estimate of enrichment, that is, the increased likelihood (versus random) of this sample being in the category.

Bayesian Score: The standard Laplacian-modified Bayesian score.

Mahalanobis Distance: The Mahalanobis distance (MD) is the distance to the center of the training data. The larger the MD, the less trustworthy the prediction.

Mahalanobis Distance p-value: The p-value gives the fraction of training data with an MD greater than or equal to the one for the given sample, assuming normally distributed data. The smaller the p-value, the less trustworthy the prediction. For highly non-normal X properties (e.g., fingerprints), the MD p-value is wildly inaccurate.

## Structural Similar Compounds

| Name               | Moricizine                                                          | Fluticasone                                                         | Doxazosin                                                           |
|--------------------|---------------------------------------------------------------------|---------------------------------------------------------------------|---------------------------------------------------------------------|
| Structure          |                                                                     |                                                                     |                                                                     |
| Actual Endpoint    | Non-Carcinogen                                                      | Non-Carcinogen                                                      | Non-Carcinogen                                                      |
| Predicted Endpoint | Non-Carcinogen                                                      | Carcinogen                                                          | Non-Carcinogen                                                      |
| Distance           | 0.646                                                               | 0.653                                                               | 0.667                                                               |
| Reference          | US FDA (Centre for Drug Eval.& Res./Off. Testing & Res.) Sept. 1997 | US FDA (Centre for Drug Eval.& Res./Off. Testing & Res.) Sept. 1997 | US FDA (Centre for Drug Eval.& Res./Off. Testing & Res.) Sept. 1997 |

## Model Applicability

Unknown features are fingerprint features in the query molecule, but not found or appearing too infrequently in the training set.

1. All properties and OPS components are within expected ranges.

## Feature Contribution

### Top features for positive contribution

| Fingerprint | Bit/Smiles  | Feature Structure                             | Score | Carcinogen in training set |
|-------------|-------------|-----------------------------------------------|-------|----------------------------|
| FCFP_6      | -1838187238 | <br>[*]C(=[*])N[c]1:[cH]:[cH]:[*]:[cH]:[cH]:1 | 0.565 | 4 out of 7                 |

|                                        |             |                                                                                                                                                    |        |                            |
|----------------------------------------|-------------|----------------------------------------------------------------------------------------------------------------------------------------------------|--------|----------------------------|
| FCFP_6                                 | 675799546   | 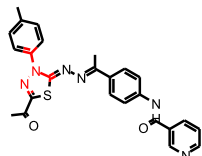<br><chem>[*]=C1[*][*]=NN1[c](:[*]):[*]</chem>                  | 0.46   | 1 out of 1                 |
| FCFP_6                                 | -319371573  | <br><chem>[*]=C1[*][*]=NN1[c]2:[cH]:[cH]:[*]:[cH]:[cH]:2</chem> | 0.46   | 1 out of 1                 |
| Top Features for negative contribution |             |                                                                                                                                                    |        |                            |
| Fingerprint                            | Bit/Smiles  | Feature Structure                                                                                                                                  | Score  | Carcinogen in training set |
| FCFP_6                                 | -1773728142 | <br><chem>[*][c]1:[*]:[cH]:[cH]:[c](C):[cH]:1</chem>            | -1.29  | 0 out of 10                |
| FCFP_6                                 | 2109043264  | <br><chem>[*][c]1:[cH]:[cH]:[c]:(C):[cH]:[cH]:1</chem>         | -0.947 | 0 out of 6                 |
| FCFP_6                                 | 1153798395  | <br><chem>[*]C(=[*])[c]1:[cH]:[*]:[cH]:n:[cH]:1</chem>        | -0.582 | 0 out of 3                 |

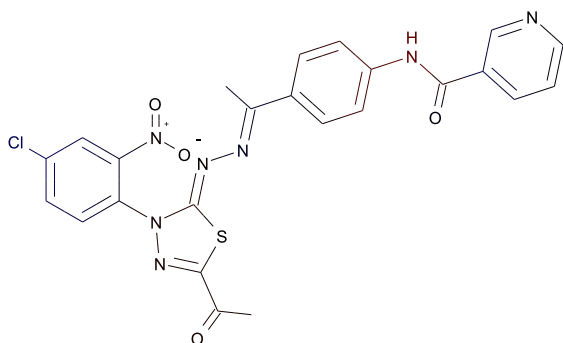

$C_{24}H_{18}ClN_7O_4S$

Molecular Weight: 535.96222

ALogP: 4.153

Rotatable Bonds: 7

Acceptors: 10

Donors: 1

## Model Prediction

Prediction: Carcinogen

Probability: 0.282

Enrichment: 0.958

Bayesian Score: -0.917

Mahalanobis Distance: 18.5

Mahalanobis Distance p-value: 2.22e-015

Prediction: Positive if the Bayesian score is above the estimated best cutoff value from minimizing the false positive and false negative rate.

Probability: The estimated probability that the sample is in the positive category. This assumes that the Bayesian score follows a normal distribution and is different from the prediction using a cutoff.

Enrichment: An estimate of enrichment, that is, the increased likelihood (versus random) of this sample being in the category. Bayesian Score: The standard Laplacian-modified Bayesian score.

Mahalanobis Distance: The Mahalanobis distance (MD) is the distance to the center of the training data. The larger the MD, the less trustworthy the prediction.

Mahalanobis Distance p-value: The p-value gives the fraction of training data with an MD greater than or equal to the one for the given sample, assuming normally distributed data. The smaller the p-value, the less trustworthy the prediction. For highly non-normal X properties (e.g., fingerprints), the MD p-value is wildly inaccurate.

## Structural Similar Compounds

| Name               | Doxazosin                                                           | Reserpine                                                           | Nicardipine                                                         |
|--------------------|---------------------------------------------------------------------|---------------------------------------------------------------------|---------------------------------------------------------------------|
| Structure          |                                                                     |                                                                     |                                                                     |
| Actual Endpoint    | Non-Carcinogen                                                      | Carcinogen                                                          | Non-Carcinogen                                                      |
| Predicted Endpoint | Non-Carcinogen                                                      | Carcinogen                                                          | Non-Carcinogen                                                      |
| Distance           | 0.772                                                               | 0.795                                                               | 0.807                                                               |
| Reference          | US FDA (Centre for Drug Eval.& Res./Off. Testing & Res.) Sept. 1997 | US FDA (Centre for Drug Eval.& Res./Off. Testing & Res.) Sept. 1997 | US FDA (Centre for Drug Eval.& Res./Off. Testing & Res.) Sept. 1997 |

## Model Applicability

Unknown features are fingerprint features in the query molecule, but not found or appearing too infrequently in the training set.

1. All properties and OPS components are within expected ranges.
2. Unknown FCFP\_2 feature: 5: [\*][O-]
3. Unknown FCFP\_2 feature: -828984032: [\*][c](:[\*]):[c](:[cH]:[\*])[N+](=[\*])[\*]
4. Unknown FCFP\_2 feature: -1338588315: [\*]:[c](:[\*])[N+](=O)[O-]
5. Unknown FCFP\_2 feature: 1872392852: [\*][N+](=O)[\*]
6. Unknown FCFP\_2 feature: 260476081: [\*][N+](=[\*])[O-]

## Feature Contribution

### Top features for positive contribution

| Fingerprint | Bit/Smiles | Feature Structure | Score | Carcinogen in training set |
|-------------|------------|-------------------|-------|----------------------------|
|             |            |                   |       |                            |

| FCFP_6                                 | -1838187238 | 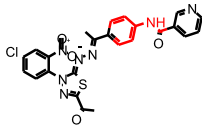<br>[*]C(=[*])N[c]1:[cH]:[cH]:[cH]:[*]:[cH]:[cH]:[cH]:1 | 0.565  | 4 out of 7                 |
|----------------------------------------|-------------|--------------------------------------------------------------------------------------------------------------------------------------------|--------|----------------------------|
| FCFP_6                                 | 675799546   | <br>[*]=C1[*][*]=NN1[c](:[*]):[*]                       | 0.46   | 1 out of 1                 |
| FCFP_6                                 | 1294255210  | <br>[*]C(=[*])N[c](:[*]):[*]                            | 0.441  | 12 out of 28               |
| Top Features for negative contribution |             |                                                                                                                                            |        |                            |
| Fingerprint                            | Bit/Smiles  | Feature Structure                                                                                                                          | Score  | Carcinogen in training set |
| FCFP_6                                 | 1153798395  | <br>[*]C(=[*])[c]1:[cH]:[*]:[cH]:n:[cH]:1             | -0.582 | 0 out of 3                 |
| FCFP_6                                 | -1549192822 | <br>[*]N=C(/C)[c](:[*]):[*]                           | -0.489 | 3 out of 21                |



|        |           |                                                                                                                               |        |             |
|--------|-----------|-------------------------------------------------------------------------------------------------------------------------------|--------|-------------|
| FCFP_6 | 551850122 | 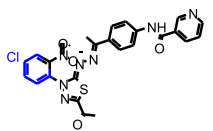<br>[*][c]1:[*]:[cH]:[cH]<br>:[cH]:[c]:1Cl | -0.433 | 8 out of 49 |
|--------|-----------|-------------------------------------------------------------------------------------------------------------------------------|--------|-------------|

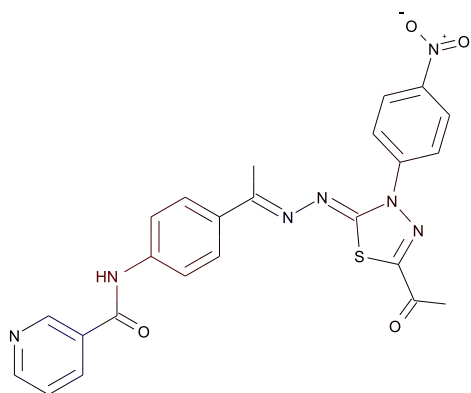

$C_{24}H_{19}N_7O_4S$

Molecular Weight: 501.51715

ALogP: 3.488

Rotatable Bonds: 7

Acceptors: 10

Donors: 1

## Model Prediction

Prediction: Carcinogen

Probability: 0.336

Enrichment: 1.14

Bayesian Score: 1.04

Mahalanobis Distance: 18

Mahalanobis Distance p-value: 2.98e-014

Prediction: Positive if the Bayesian score is above the estimated best cutoff value from minimizing the false positive and false negative rate.

Probability: The estimated probability that the sample is in the positive category. This assumes that the Bayesian score follows a normal distribution and is different from the prediction using a cutoff.

Enrichment: An estimate of enrichment, that is, the increased likelihood (versus random) of this sample being in the category.

Bayesian Score: The standard Laplacian-modified Bayesian score.

Mahalanobis Distance: The Mahalanobis distance (MD) is the distance to the center of the training data. The larger the MD, the less trustworthy the prediction.

Mahalanobis Distance p-value: The p-value gives the fraction of training data with an MD greater than or equal to the one for the given sample, assuming normally distributed data. The smaller the p-value, the less trustworthy the prediction. For highly non-normal X properties (e.g., fingerprints), the MD p-value is wildly inaccurate.

## Structural Similar Compounds

| Name               | Doxazosin                                                           | Bacampicillin                                                       | Nimodipine                                                          |
|--------------------|---------------------------------------------------------------------|---------------------------------------------------------------------|---------------------------------------------------------------------|
| Structure          |                                                                     |                                                                     |                                                                     |
| Actual Endpoint    | Non-Carcinogen                                                      | Non-Carcinogen                                                      | Non-Carcinogen                                                      |
| Predicted Endpoint | Non-Carcinogen                                                      | Non-Carcinogen                                                      | Non-Carcinogen                                                      |
| Distance           | 0.727                                                               | 0.771                                                               | 0.774                                                               |
| Reference          | US FDA (Centre for Drug Eval.& Res./Off. Testing & Res.) Sept. 1997 | US FDA (Centre for Drug Eval.& Res./Off. Testing & Res.) Sept. 1997 | US FDA (Centre for Drug Eval.& Res./Off. Testing & Res.) Sept. 1997 |

## Model Applicability

Unknown features are fingerprint features in the query molecule, but not found or appearing too infrequently in the training set.

1. All properties and OPS components are within expected ranges.
2. Unknown FCFP\_2 feature: 5: [\*][O-]
3. Unknown FCFP\_2 feature: -828984032: [\*][c](:[\*]):[c](:[cH]:[\*])[N+](=[\*])[\*]
4. Unknown FCFP\_2 feature: -1338588315: [\*]:[c](:[\*])[N+](=O)[O-]
5. Unknown FCFP\_2 feature: 1872392852: [\*][N+](=O)[\*]
6. Unknown FCFP\_2 feature: 260476081: [\*][N+](=[\*])[O-]

## Feature Contribution

### Top features for positive contribution

| Fingerprint | Bit/Smiles | Feature Structure | Score | Carcinogen in training set |
|-------------|------------|-------------------|-------|----------------------------|
|             |            |                   |       |                            |

|                                        |             |                                                                                                                                                    |        |                            |
|----------------------------------------|-------------|----------------------------------------------------------------------------------------------------------------------------------------------------|--------|----------------------------|
| FCFP_6                                 | -1838187238 | 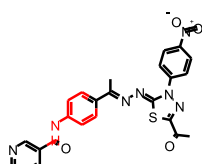<br><chem>[*]C(=[*])N[c]1:[cH]:[cH]:[*]:[cH]:[cH]:[cH]:1</chem> | 0.565  | 4 out of 7                 |
| FCFP_6                                 | 675799546   | <br><chem>[*]=C1[*][*]=NN1[c](:[*]):[*]</chem>                  | 0.46   | 1 out of 1                 |
| FCFP_6                                 | -319371573  | <br><chem>[*]=C1[*][*]=NN1[c]2:[cH]:[cH]:[*]:[cH]:[cH]:2</chem> | 0.46   | 1 out of 1                 |
| Top Features for negative contribution |             |                                                                                                                                                    |        |                            |
| Fingerprint                            | Bit/Smiles  | Feature Structure                                                                                                                                  | Score  | Carcinogen in training set |
| FCFP_6                                 | 1153798395  | <br><chem>[*]C(=[*])[c]1:[cH]:[*]:[cH]:n:[cH]:1</chem>         | -0.582 | 0 out of 3                 |
| FCFP_6                                 | -1549192822 | <br><chem>[*]N=C(/C)[c](:[*]):[*]</chem>                      | -0.489 | 3 out of 21                |



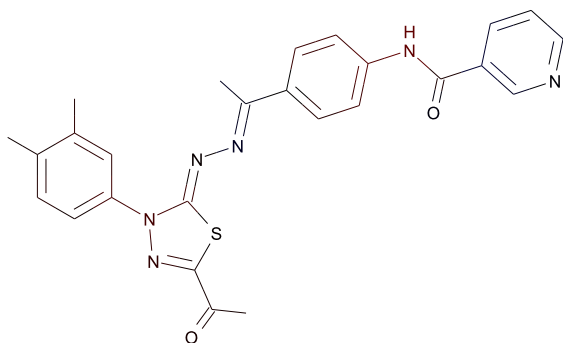

$C_{26}H_{24}N_6O_2S$

Molecular Weight: 484.57275

ALogP: 4.566

Rotatable Bonds: 6

Acceptors: 8

Donors: 1

## Model Prediction

**Prediction: Carcinogen**

Probability: 0.35

Enrichment: 1.19

Bayesian Score: 1.5

Mahalanobis Distance: 20.3

Mahalanobis Distance p-value: 1.69e-019

Prediction: Positive if the Bayesian score is above the estimated best cutoff value from minimizing the false positive and false negative rate.

Probability: The estimated probability that the sample is in the positive category. This assumes that the Bayesian score follows a normal distribution and is different from the prediction using a cutoff.

Enrichment: An estimate of enrichment, that is, the increased likelihood (versus random) of this sample being in the category.

Bayesian Score: The standard Laplacian-modified Bayesian score.

Mahalanobis Distance: The Mahalanobis distance (MD) is the distance to the center of the training data. The larger the MD, the less trustworthy the prediction.

Mahalanobis Distance p-value: The p-value gives the fraction of training data with an MD greater than or equal to the one for the given sample, assuming normally distributed data. The smaller the p-value, the less trustworthy the prediction. For highly non-normal X properties (e.g., fingerprints), the MD p-value is wildly inaccurate.

## Structural Similar Compounds

| Name               | Fluticasone                                                         | Moricizine                                                          | Doxazosin                                                           |
|--------------------|---------------------------------------------------------------------|---------------------------------------------------------------------|---------------------------------------------------------------------|
| Structure          |                                                                     |                                                                     |                                                                     |
| Actual Endpoint    | Non-Carcinogen                                                      | Non-Carcinogen                                                      | Non-Carcinogen                                                      |
| Predicted Endpoint | Carcinogen                                                          | Non-Carcinogen                                                      | Non-Carcinogen                                                      |
| Distance           | 0.650                                                               | 0.677                                                               | 0.705                                                               |
| Reference          | US FDA (Centre for Drug Eval.& Res./Off. Testing & Res.) Sept. 1997 | US FDA (Centre for Drug Eval.& Res./Off. Testing & Res.) Sept. 1997 | US FDA (Centre for Drug Eval.& Res./Off. Testing & Res.) Sept. 1997 |

## Model Applicability

Unknown features are fingerprint features in the query molecule, but not found or appearing too infrequently in the training set.

1. All properties and OPS components are within expected ranges.

## Feature Contribution

### Top features for positive contribution

| Fingerprint | Bit/Smiles  | Feature Structure                             | Score | Carcinogen in training set |
|-------------|-------------|-----------------------------------------------|-------|----------------------------|
| FCFP_6      | -1838187238 | <br>[*]C(=[*])N[c]1:[cH]:[cH]:[*]:[cH]:[cH]:1 | 0.565 | 4 out of 7                 |

| FCFP_6                                 | -319371573  | 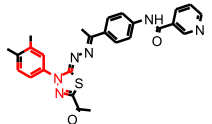<br>[*]=C1[*][*]=NN1[c]2:<br>[cH]:[cH]:[*]:[cH]:[<br>cH]:2 | 0.46   | 1 out of 1                 |
|----------------------------------------|-------------|-----------------------------------------------------------------------------------------------------------------------------------------------|--------|----------------------------|
| FCFP_6                                 | 1075826633  | <br>[*][c]1:[*]:[cH]:[c](<br>C):[c](C):[cH]:1              | 0.46   | 1 out of 1                 |
| Top Features for negative contribution |             |                                                                                                                                               |        |                            |
| Fingerprint                            | Bit/Smiles  | Feature Structure                                                                                                                             | Score  | Carcinogen in training set |
| FCFP_6                                 | 1153798395  | <br>[*]C(=[*])[c]1:[cH]:[<br>*]:[cH]:n:[cH]:1              | -0.582 | 0 out of 3                 |
| FCFP_6                                 | -1549192822 | <br>[*]N=C(/C)[c]([*])<br>:[*]                            | -0.489 | 3 out of 21                |
| FCFP_6                                 | 1888947587  | <br>[*][c]1:[cH]:[cH]:[cH]<br>]:n:[cH]:1                 | -0.423 | 0 out of 2                 |

# Sorafenib

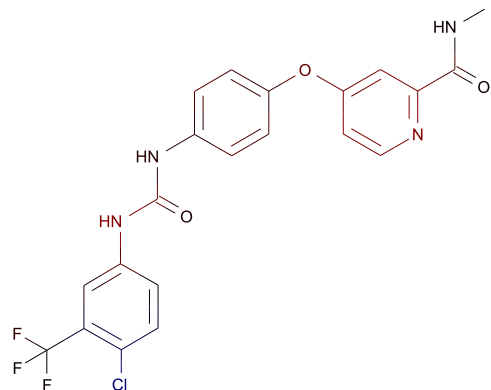

$C_{21}H_{16}ClF_3N_4O_3$

Molecular Weight: 464.82494

ALogP: 4.175

Rotatable Bonds: 6

Acceptors: 4

Donors: 3

## Model Prediction

**Prediction: Carcinogen**

Probability: 0.444

Enrichment: 1.51

Bayesian Score: 4.21

Mahalanobis Distance: 20.3

Mahalanobis Distance p-value: 1.28e-019

Prediction: Positive if the Bayesian score is above the estimated best cutoff value from minimizing the false positive and false negative rate.

Probability: The estimated probability that the sample is in the positive category. This assumes that the Bayesian score follows a normal distribution and is different from the prediction using a cutoff.

Enrichment: An estimate of enrichment, that is, the increased likelihood (versus random) of this sample being in the category.

Bayesian Score: The standard Laplacian-modified Bayesian score.

Mahalanobis Distance: The Mahalanobis distance (MD) is the distance to the center of the training data. The larger the MD, the less trustworthy the prediction.

Mahalanobis Distance p-value: The p-value gives the fraction of training data with an MD greater than or equal to the one for the given sample, assuming normally distributed data. The smaller the p-value, the less trustworthy the prediction. For highly non-normal X properties (e.g., fingerprints), the MD p-value is wildly inaccurate.

# TOPKAT\_Mouse\_Male\_FDA\_None\_vs\_Carcinogen

## Structural Similar Compounds

| Name               | Glyburide                                                           | Glimepiride                                                         | Fluvastatin                                                         |
|--------------------|---------------------------------------------------------------------|---------------------------------------------------------------------|---------------------------------------------------------------------|
| Structure          |                                                                     |                                                                     |                                                                     |
| Actual Endpoint    | Non-Carcinogen                                                      | Carcinogen                                                          | Non-Carcinogen                                                      |
| Predicted Endpoint | Non-Carcinogen                                                      | Carcinogen                                                          | Non-Carcinogen                                                      |
| Distance           | 0.594                                                               | 0.599                                                               | 0.603                                                               |
| Reference          | US FDA (Centre for Drug Eval.& Res./Off. Testing & Res.) Sept. 1997 | US FDA (Centre for Drug Eval.& Res./Off. Testing & Res.) Sept. 1997 | US FDA (Centre for Drug Eval.& Res./Off. Testing & Res.) Sept. 1997 |

## Model Applicability

Unknown features are fingerprint features in the query molecule, but not found or appearing too infrequently in the training set.

1. All properties and OPS components are within expected ranges.

## Feature Contribution

### Top features for positive contribution

| Fingerprint | Bit/Smiles | Feature Structure | Score | Carcinogen in training set |
|-------------|------------|-------------------|-------|----------------------------|
| FCFP_6      | 71953198   |                   | 0.612 | 12 out of 23               |

[\*]C([\*])([\*])F

|                                        |             |                                                                                                                                                        |        |                            |
|----------------------------------------|-------------|--------------------------------------------------------------------------------------------------------------------------------------------------------|--------|----------------------------|
| FCFP_6                                 | -1838187238 | 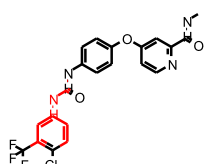<br><chem>[*]C(=[*])N(c)1:[cH]:[cH]:[*]:[cH]:[cH]:1</chem>          | 0.565  | 4 out of 7                 |
| FCFP_6                                 | -1270820019 | <br><chem>[*]:[c]([*])O(c)1:[cH]:[cH]:[*]:[cH]:[cH]:1</chem>        | 0.46   | 1 out of 1                 |
| Top Features for negative contribution |             |                                                                                                                                                        |        |                            |
| Fingerprint                            | Bit/Smiles  | Feature Structure                                                                                                                                      | Score  | Carcinogen in training set |
| FCFP_6                                 | 2104062943  | <br><chem>[*]C([*])([*])([*])[c]1:[cH]:[*]:[cH]:[cH]:[c]:1Cl</chem> | -1.01  | 1 out of 17                |
| FCFP_6                                 | 551850122   | <br><chem>[*][c]1:[*]:[cH]:[cH]:[cH]:[c]:1Cl</chem>                | -0.433 | 8 out of 49                |
| FCFP_6                                 | 71476542    | <br><chem>[*]:[c](:[*])Cl</chem>                                  | -0.406 | 10 out of 59               |



7b

## TOPKAT\_Mouse\_Male\_FDA\_Single\_vs\_Multiple

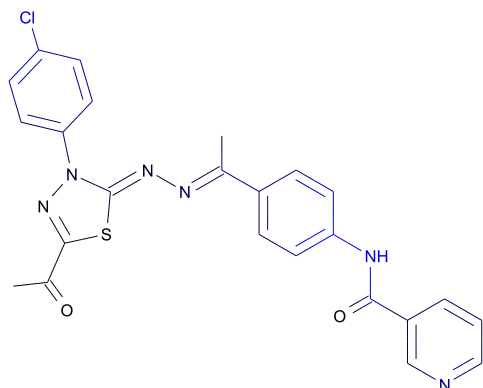C<sub>24</sub>H<sub>19</sub>ClN<sub>6</sub>O<sub>2</sub>S

Molecular Weight: 490.96465

ALogP: 4.258

Rotatable Bonds: 6

Acceptors: 8

Donors: 1

**Model Prediction**

Prediction: Single-Carcinogen

Probability: 0.142

Enrichment: 0.471

Bayesian Score: -14.4

Mahalanobis Distance: 16.5

Mahalanobis Distance p-value: 1.72e-007

Prediction: Positive if the Bayesian score is above the estimated best cutoff value from minimizing the false positive and false negative rate.

Probability: The estimated probability that the sample is in the positive category. This assumes that the Bayesian score follows a normal distribution and is different from the prediction using a cutoff.

Enrichment: An estimate of enrichment, that is, the increased likelihood (versus random) of this sample being in the category.

Bayesian Score: The standard Laplacian-modified Bayesian score.

Mahalanobis Distance: The Mahalanobis distance (MD) is the distance to the center of the training data. The larger the MD, the less trustworthy the prediction.

Mahalanobis Distance p-value: The p-value gives the fraction of training data with an MD greater than or equal to the one for the given sample, assuming normally distributed data. The smaller the p-value, the less trustworthy the prediction. For highly non-normal X properties (e.g., fingerprints), the MD p-value is wildly inaccurate.

**Structural Similar Compounds**

| Name               | Bicalutamide                                                        | Simvastatin                                                         | Lovastatin                                                          |
|--------------------|---------------------------------------------------------------------|---------------------------------------------------------------------|---------------------------------------------------------------------|
| Structure          |                                                                     |                                                                     |                                                                     |
| Actual Endpoint    | Single-Carcinogen                                                   | Multiple-Carcinogen                                                 | Multiple-Carcinogen                                                 |
| Predicted Endpoint | Single-Carcinogen                                                   | Multiple-Carcinogen                                                 | Multiple-Carcinogen                                                 |
| Distance           | 0.833                                                               | 0.843                                                               | 0.847                                                               |
| Reference          | US FDA (Centre for Drug Eval.& Res./Off. Testing & Res.) Sept. 1997 | US FDA (Centre for Drug Eval.& Res./Off. Testing & Res.) Sept. 1997 | US FDA (Centre for Drug Eval.& Res./Off. Testing & Res.) Sept. 1997 |

**Model Applicability**

Unknown features are fingerprint features in the query molecule, but not found or appearing too infrequently in the training set.

- OPS PC2 out of range. Value: 4.2927. Training min, max, SD, explained variance: -5.2888, 4.2744, 2.566, 0.1229.
- OPS PC5 out of range. Value: 3.9023. Training min, max, SD, explained variance: -3.5268, 3.8048, 1.733, 0.0560.

**Feature Contribution**

| Top features for positive contribution |            |                                                 |       |                                     |
|----------------------------------------|------------|-------------------------------------------------|-------|-------------------------------------|
| Fingerprint                            | Bit/Smiles | Feature Structure                               | Score | Multiple-Carcinogen in training set |
| FCFP_12                                | 547884906  | <br><chem>[*][c]1:[*]:[cH]:[cH]:n:[cH]:1</chem> | 0.4   | 1 out of 1                          |

|                                        |            |                                                                                                                                                 |        |                                     |
|----------------------------------------|------------|-------------------------------------------------------------------------------------------------------------------------------------------------|--------|-------------------------------------|
| FCFP_12                                | 565998553  | 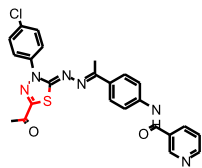<br><chem>[*]C(=[*])C1=N[*]][*]S1</chem>                     | 0.194  | 6 out of 14                         |
| FCFP_12                                | 567484887  | <br><chem>[*]N([*])[c]1:[cH]:[cH]:[c](Cl):[cH]:[cH]:1</chem> | 0.174  | 1 out of 2                          |
| Top Features for negative contribution |            |                                                                                                                                                 |        |                                     |
| Fingerprint                            | Bit/Smiles | Feature Structure                                                                                                                               | Score  | Multiple-Carcinogen in training set |
| FCFP_12                                | 1294255210 | <br><chem>[*]C(=[*])N[c](:[*]):[*]</chem>                    | -1.63  | 0 out of 12                         |
| FCFP_12                                | 590925877  | <br><chem>[*]N[c](:[cH]:[*]):[cH]:[*]</chem>               | -0.998 | 1 out of 13                         |
| FCFP_12                                | 730557100  | <br><chem>[*][c]1:[*]:n:[cH]:[cH]:[cH]:1</chem>            | -0.859 | 0 out of 4                          |



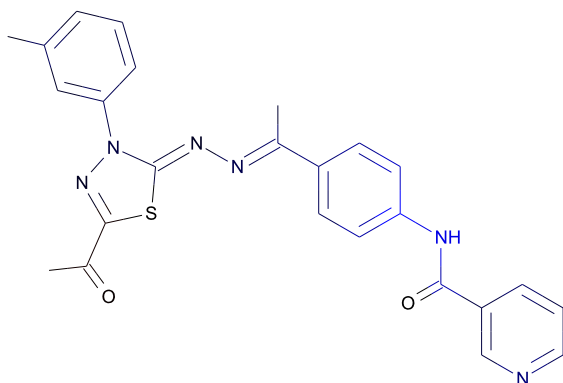
 $C_{25}H_{22}N_6O_2S$ 

Molecular Weight: 470.54617

ALogP: 4.08

Rotatable Bonds: 6

Acceptors: 8

Donors: 1

## Model Prediction

Prediction: Single-Carcinogen

Probability: 0.15

Enrichment: 0.498

Bayesian Score: -11.5

Mahalanobis Distance: 17.9

Mahalanobis Distance p-value: 1.42e-008

Prediction: Positive if the Bayesian score is above the estimated best cutoff value from minimizing the false positive and false negative rate.

Probability: The estimated probability that the sample is in the positive category. This assumes that the Bayesian score follows a normal distribution and is different from the prediction using a cutoff.

Enrichment: An estimate of enrichment, that is, the increased likelihood (versus random) of this sample being in the category.

Bayesian Score: The standard Laplacian-modified Bayesian score.

Mahalanobis Distance: The Mahalanobis distance (MD) is the distance to the center of the training data. The larger the MD, the less trustworthy the prediction.

Mahalanobis Distance p-value: The p-value gives the fraction of training data with an MD greater than or equal to the one for the given sample, assuming normally distributed data. The smaller the p-value, the less trustworthy the prediction. For highly non-normal X properties (e.g., fingerprints), the MD p-value is wildly inaccurate.

## Structural Similar Compounds

| Name               | Simvastatin                                                         | Lovastatin                                                          | Bicalutamide                                                        |
|--------------------|---------------------------------------------------------------------|---------------------------------------------------------------------|---------------------------------------------------------------------|
| Structure          |                                                                     |                                                                     |                                                                     |
| Actual Endpoint    | Multiple-Carcinogen                                                 | Multiple-Carcinogen                                                 | Single-Carcinogen                                                   |
| Predicted Endpoint | Multiple-Carcinogen                                                 | Multiple-Carcinogen                                                 | Single-Carcinogen                                                   |
| Distance           | 0.832                                                               | 0.833                                                               | 0.838                                                               |
| Reference          | US FDA (Centre for Drug Eval.& Res./Off. Testing & Res.) Sept. 1997 | US FDA (Centre for Drug Eval.& Res./Off. Testing & Res.) Sept. 1997 | US FDA (Centre for Drug Eval.& Res./Off. Testing & Res.) Sept. 1997 |

## Model Applicability

Unknown features are fingerprint features in the query molecule, but not found or appearing too infrequently in the training set.

- OPS PC12 out of range. Value: 2.6425. Training min, max, SD, explained variance: -3.4599, 2.3291, 1.246, 0.0290.

## Feature Contribution

| Top features for positive contribution |            |                                                 |       |                                     |
|----------------------------------------|------------|-------------------------------------------------|-------|-------------------------------------|
| Fingerprint                            | Bit/Smiles | Feature Structure                               | Score | Multiple-Carcinogen in training set |
| FCFP_12                                | 547884906  | <br><chem>[*][c]1:[*]:[cH]:[cH]:n:[cH]:1</chem> | 0.4   | 1 out of 1                          |

|                                        |             |                                                                                                                                                 |        |                                     |
|----------------------------------------|-------------|-------------------------------------------------------------------------------------------------------------------------------------------------|--------|-------------------------------------|
| FCFP_12                                | 565998553   | 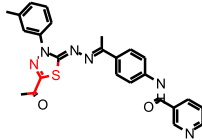<br><chem>[*]C(=[*])C1=N[*]][*]S1</chem>                     | 0.194  | 6 out of 14                         |
| FCFP_12                                | -1549103449 | <br><chem>[*]NC(=O)[c](:[*]):[*]</chem>                      | 0.168  | 3 out of 7                          |
| Top Features for negative contribution |             |                                                                                                                                                 |        |                                     |
| Fingerprint                            | Bit/Smiles  | Feature Structure                                                                                                                               | Score  | Multiple-Carcinogen in training set |
| FCFP_12                                | 1294255210  | <br><chem>[*]C(=[*])N[c](:[*]):[*]</chem>                    | -1.63  | 0 out of 12                         |
| FCFP_12                                | 590925877   | <br><chem>[*]N[c](:[cH]:[*]):[cH]:[*]</chem>               | -0.998 | 1 out of 13                         |
| FCFP_12                                | -1838187238 | <br><chem>[*]C(=[*])N[c]1:[cH]:[cH]:[*]:[cH]:[cH]:1</chem> | -0.859 | 0 out of 4                          |



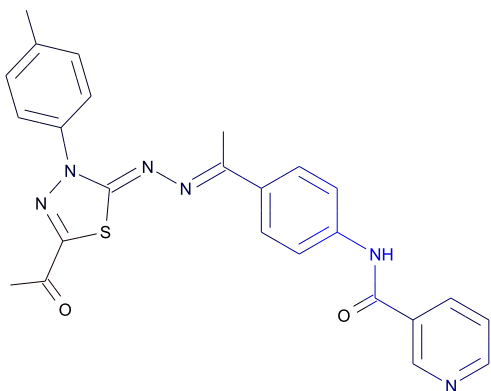

$C_{25}H_{22}N_6O_2S$

Molecular Weight: 470.54617

ALogP: 4.08

Rotatable Bonds: 6

Acceptors: 8

Donors: 1

## Model Prediction

Prediction: Single-Carcinogen

Probability: 0.147

Enrichment: 0.49

Bayesian Score: -10.8

Mahalanobis Distance: 18.6

Mahalanobis Distance p-value: 4.71e-009

Prediction: Positive if the Bayesian score is above the estimated best cutoff value from minimizing the false positive and false negative rate.

Probability: The estimated probability that the sample is in the positive category. This assumes that the Bayesian score follows a normal distribution and is different from the prediction using a cutoff.

Enrichment: An estimate of enrichment, that is, the increased likelihood (versus random) of this sample being in the category.

Bayesian Score: The standard Laplacian-modified Bayesian score.

Mahalanobis Distance: The Mahalanobis distance (MD) is the distance to the center of the training data. The larger the MD, the less trustworthy the prediction.

Mahalanobis Distance p-value: The p-value gives the fraction of training data with an MD greater than or equal to the one for the given sample, assuming normally distributed data. The smaller the p-value, the less trustworthy the prediction. For highly non-normal X properties (e.g., fingerprints), the MD p-value is wildly inaccurate.

## Structural Similar Compounds

| Name               | Simvastatin                                                         | Lovastatin                                                          | Bicalutamide                                                        |
|--------------------|---------------------------------------------------------------------|---------------------------------------------------------------------|---------------------------------------------------------------------|
| Structure          |                                                                     |                                                                     |                                                                     |
| Actual Endpoint    | Multiple-Carcinogen                                                 | Multiple-Carcinogen                                                 | Single-Carcinogen                                                   |
| Predicted Endpoint | Multiple-Carcinogen                                                 | Multiple-Carcinogen                                                 | Single-Carcinogen                                                   |
| Distance           | 0.833                                                               | 0.833                                                               | 0.838                                                               |
| Reference          | US FDA (Centre for Drug Eval.& Res./Off. Testing & Res.) Sept. 1997 | US FDA (Centre for Drug Eval.& Res./Off. Testing & Res.) Sept. 1997 | US FDA (Centre for Drug Eval.& Res./Off. Testing & Res.) Sept. 1997 |

## Model Applicability

Unknown features are fingerprint features in the query molecule, but not found or appearing too infrequently in the training set.

1. OPS PC12 out of range. Value: 2.3406. Training min, max, SD, explained variance: -3.4599, 2.3291, 1.246, 0.0290.

## Feature Contribution

| Top features for positive contribution |            |                                                 |       |                                     |
|----------------------------------------|------------|-------------------------------------------------|-------|-------------------------------------|
| Fingerprint                            | Bit/Smiles | Feature Structure                               | Score | Multiple-Carcinogen in training set |
| FCFP_12                                | 547884906  | <br><chem>[*][c]1:[*]:[cH]:[cH]:n:[cH]:1</chem> | 0.4   | 1 out of 1                          |

|                                        |             |                                                                                                                                                 |        |                                     |
|----------------------------------------|-------------|-------------------------------------------------------------------------------------------------------------------------------------------------|--------|-------------------------------------|
| FCFP_12                                | 565998553   | 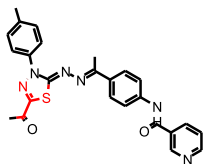<br><chem>[*]C(=[*])C1=N[*]]1S</chem>                        | 0.194  | 6 out of 14                         |
| FCFP_12                                | -1549103449 | <br><chem>[*]NC(=O)[c](:[*]):[*]</chem>                      | 0.168  | 3 out of 7                          |
| Top Features for negative contribution |             |                                                                                                                                                 |        |                                     |
| Fingerprint                            | Bit/Smiles  | Feature Structure                                                                                                                               | Score  | Multiple-Carcinogen in training set |
| FCFP_12                                | 1294255210  | <br><chem>[*]C(=[*])N[c](:[*]):[*]</chem>                    | -1.63  | 0 out of 12                         |
| FCFP_12                                | 590925877   | <br><chem>[*]N[c](:[cH]:[*]):[cH]:[*]</chem>               | -0.998 | 1 out of 13                         |
| FCFP_12                                | -1838187238 | <br><chem>[*]C(=[*])N[c]1:[cH]:[cH]:[*]:[cH]:[cH]:1</chem> | -0.859 | 0 out of 4                          |





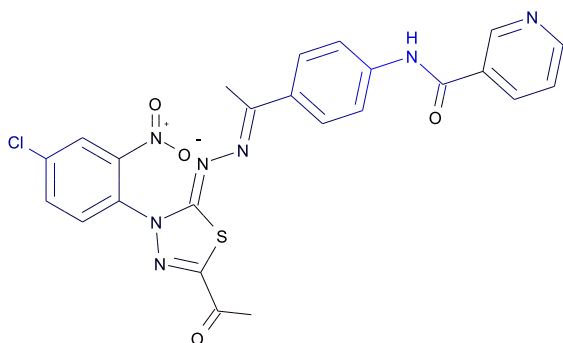

$C_{24}H_{18}ClN_7O_4S$

Molecular Weight: 535.96222

ALogP: 4.153

Rotatable Bonds: 7

Acceptors: 10

Donors: 1

## Model Prediction

Prediction: Single-Carcinogen

Probability: 0.149

Enrichment: 0.494

Bayesian Score: -13.6

Mahalanobis Distance: 17.9

Mahalanobis Distance p-value: 1.53e-008

Prediction: Positive if the Bayesian score is above the estimated best cutoff value from minimizing the false positive and false negative rate.

Probability: The estimated probability that the sample is in the positive category. This assumes that the Bayesian score follows a normal distribution and is different from the prediction using a cutoff.

Enrichment: An estimate of enrichment, that is, the increased likelihood (versus random) of this sample being in the category. Bayesian Score: The standard Laplacian-modified Bayesian score.

Mahalanobis Distance: The Mahalanobis distance (MD) is the distance to the center of the training data. The larger the MD, the less trustworthy the prediction.

Mahalanobis Distance p-value: The p-value gives the fraction of training data with an MD greater than or equal to the one for the given sample, assuming normally distributed data. The smaller the p-value, the less trustworthy the prediction. For highly non-normal X properties (e.g., fingerprints), the MD p-value is wildly inaccurate.

## Structural Similar Compounds

| Name               | Reserpine                                                           | Sulfasalazine                                                       | Bicalutamide                                                        |
|--------------------|---------------------------------------------------------------------|---------------------------------------------------------------------|---------------------------------------------------------------------|
| Structure          |                                                                     |                                                                     |                                                                     |
| Actual Endpoint    | Multiple-Carcinogen                                                 | Single-Carcinogen                                                   | Single-Carcinogen                                                   |
| Predicted Endpoint | Multiple-Carcinogen                                                 | Single-Carcinogen                                                   | Single-Carcinogen                                                   |
| Distance           | 0.814                                                               | 0.966                                                               | 1.038                                                               |
| Reference          | US FDA (Centre for Drug Eval.& Res./Off. Testing & Res.) Sept. 1997 | US FDA (Centre for Drug Eval.& Res./Off. Testing & Res.) Sept. 1997 | US FDA (Centre for Drug Eval.& Res./Off. Testing & Res.) Sept. 1997 |

## Model Applicability

Unknown features are fingerprint features in the query molecule, but not found or appearing too infrequently in the training set.

- OPS PC2 out of range. Value: 4.412. Training min, max, SD, explained variance: -5.2888, 4.2744, 2.566, 0.1229.
- OPS PC5 out of range. Value: 3.8935. Training min, max, SD, explained variance: -3.5268, 3.8048, 1.733, 0.0560.
- Unknown FCFP\_2 feature: 5: [\*][O-]
- Unknown FCFP\_2 feature: -828984032: [\*][c](:[\*]):[c](:[cH]:[\*])[N+](=[\*])[\*]
- Unknown FCFP\_2 feature: -1338588315: [\*]:[c](:[\*])[N+](=O)[O-]
- Unknown FCFP\_2 feature: 1872392852: [\*][N+](=O)[\*]
- Unknown FCFP\_2 feature: 260476081: [\*][N+](=[\*])[O-]

## Feature Contribution

| Top features for positive contribution |            |                   |       |                                     |
|----------------------------------------|------------|-------------------|-------|-------------------------------------|
| Fingerprint                            | Bit/Smiles | Feature Structure | Score | Multiple-Carcinogen in training set |
|                                        |            |                   |       |                                     |

|                                        |            |                                                                                                                                         |        |                                     |
|----------------------------------------|------------|-----------------------------------------------------------------------------------------------------------------------------------------|--------|-------------------------------------|
| FCFP_12                                | 547884906  | 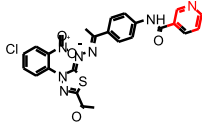<br>[*][c]1:[*]:[cH]:[cH]:n:[cH]:1                   | 0.4    | 1 out of 1                          |
| FCFP_12                                | 565998553  | <br>[*]C(=[*])C1=N[*]I[*]S1                          | 0.194  | 6 out of 14                         |
| FCFP_12                                | 567484887  | <br>[*]N([*])[c]1:[cH]:[cH]:[cH]:[c](Cl):[cH]:[cH]:1 | 0.174  | 1 out of 2                          |
| Top Features for negative contribution |            |                                                                                                                                         |        |                                     |
| Fingerprint                            | Bit/Smiles | Feature Structure                                                                                                                       | Score  | Multiple-Carcinogen in training set |
| FCFP_12                                | 1294255210 | <br>[*]C(=[*])N[c](:[*]):[*]                       | -1.63  | 0 out of 12                         |
| FCFP_12                                | 590925877  | <br>[*]N[c](:[cH]:[*]):[cH]:[*]                    | -0.998 | 1 out of 13                         |

|         |           |                                                                                                                                                                                                                   |        |            |
|---------|-----------|-------------------------------------------------------------------------------------------------------------------------------------------------------------------------------------------------------------------|--------|------------|
| FCFP_12 | 730557100 | 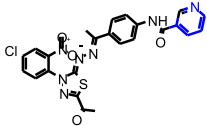 <p> <chem>*c1ccccc1n2c(s2)C(=O)N(c3ccc(NC(=O)c4ccncc4)cc3)c5ccccc5Cl</chem> </p> <p> [*][c]1:[*]:n:[cH]:[c<br/>H]:[cH]:1 </p> | -0.859 | 0 out of 4 |
|---------|-----------|-------------------------------------------------------------------------------------------------------------------------------------------------------------------------------------------------------------------|--------|------------|

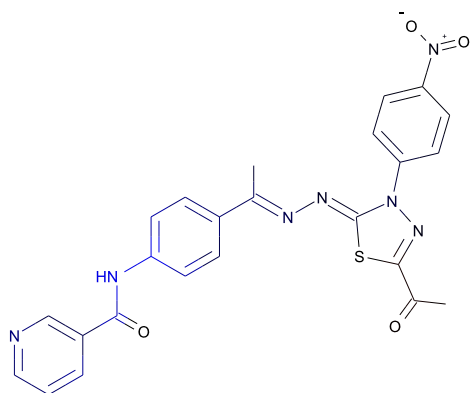

$C_{24}H_{19}N_7O_4S$

Molecular Weight: 501.51715

ALogP: 3.488

Rotatable Bonds: 7

Acceptors: 10

Donors: 1

## Model Prediction

Prediction: Single-Carcinogen

Probability: 0.151

Enrichment: 0.501

Bayesian Score: -11.7

Mahalanobis Distance: 17.6

Mahalanobis Distance p-value: 2.38e-008

Prediction: Positive if the Bayesian score is above the estimated best cutoff value from minimizing the false positive and false negative rate.

Probability: The estimated probability that the sample is in the positive category. This assumes that the Bayesian score follows a normal distribution and is different from the prediction using a cutoff.

Enrichment: An estimate of enrichment, that is, the increased likelihood (versus random) of this sample being in the category. Bayesian Score: The standard Laplacian-modified Bayesian score.

Mahalanobis Distance: The Mahalanobis distance (MD) is the distance to the center of the training data. The larger the MD, the less trustworthy the prediction.

Mahalanobis Distance p-value: The p-value gives the fraction of training data with an MD greater than or equal to the one for the given sample, assuming normally distributed data. The smaller the p-value, the less trustworthy the prediction. For highly non-normal X properties (e.g., fingerprints), the MD p-value is wildly inaccurate.

## Structural Similar Compounds

| Name               | Reserpine                                                           | Sulfasalazine                                                       | Dihydroxymethylfuratrizine                                          |
|--------------------|---------------------------------------------------------------------|---------------------------------------------------------------------|---------------------------------------------------------------------|
| Structure          |                                                                     |                                                                     |                                                                     |
| Actual Endpoint    | Multiple-Carcinogen                                                 | Single-Carcinogen                                                   | Multiple-Carcinogen                                                 |
| Predicted Endpoint | Multiple-Carcinogen                                                 | Single-Carcinogen                                                   | Multiple-Carcinogen                                                 |
| Distance           | 0.872                                                               | 0.932                                                               | 1.010                                                               |
| Reference          | US FDA (Centre for Drug Eval.& Res./Off. Testing & Res.) Sept. 1997 | US FDA (Centre for Drug Eval.& Res./Off. Testing & Res.) Sept. 1997 | US FDA (Centre for Drug Eval.& Res./Off. Testing & Res.) Sept. 1997 |

## Model Applicability

Unknown features are fingerprint features in the query molecule, but not found or appearing too infrequently in the training set.

1. All properties and OPS components are within expected ranges.
2. Unknown FCFP\_2 feature: 5: [\*][O-]
3. Unknown FCFP\_2 feature: -828984032: [\*][c](:[\*]):[c](:[cH]:[\*])[N+](=[\*])[\*]
4. Unknown FCFP\_2 feature: -1338588315: [\*]:[c](:[\*])[N+](=O)[O-]
5. Unknown FCFP\_2 feature: 1872392852: [\*][N+](=O)[\*]
6. Unknown FCFP\_2 feature: 260476081: [\*][N+](=[\*])[O-]

## Feature Contribution

### Top features for positive contribution

| Fingerprint | Bit/Smiles | Feature Structure | Score | Multiple-Carcinogen in training set |
|-------------|------------|-------------------|-------|-------------------------------------|
|             |            |                   |       |                                     |

|                                        |            |                                                                                                                                    |        |                                     |
|----------------------------------------|------------|------------------------------------------------------------------------------------------------------------------------------------|--------|-------------------------------------|
| FCFP_12                                | 547884906  | 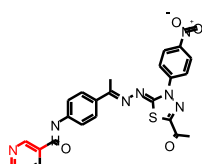<br><chem>[*][c]1:[*]:[cH]:[cH]:n:[cH]:1</chem> | 0.4    | 1 out of 1                          |
| FCFP_12                                | 565998553  | <br><chem>[*]C(=[*])C1=N[*]I[*]S1</chem>        | 0.194  | 6 out of 14                         |
| FCFP_12                                | 565968762  | <br><chem>[*]C(=[*])C(=O)C</chem>               | 0.168  | 3 out of 7                          |
| Top Features for negative contribution |            |                                                                                                                                    |        |                                     |
| Fingerprint                            | Bit/Smiles | Feature Structure                                                                                                                  | Score  | Multiple-Carcinogen in training set |
| FCFP_12                                | 1294255210 | <br><chem>[*]C(=[*])N[c](:[*]):[*]</chem>     | -1.63  | 0 out of 12                         |
| FCFP_12                                | 590925877  | <br><chem>[*]N[c](:[cH]:[*]):[cH]:[*]</chem>  | -0.998 | 1 out of 13                         |

|         |           |                                                                                                                                          |        |            |
|---------|-----------|------------------------------------------------------------------------------------------------------------------------------------------|--------|------------|
| FCFP_12 | 730557100 | 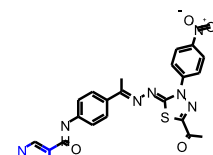 <p> <chem>[*][c]1:[*]:n:[cH]:[cH]:[cH]:1</chem> </p> | -0.859 | 0 out of 4 |
|---------|-----------|------------------------------------------------------------------------------------------------------------------------------------------|--------|------------|

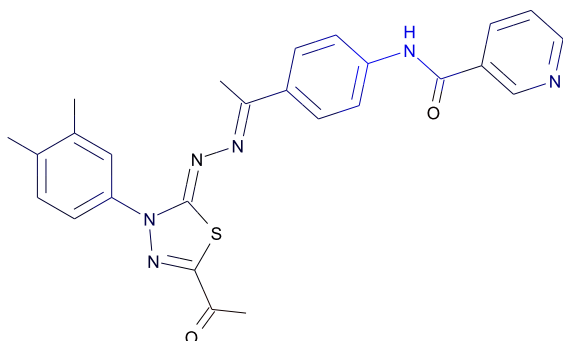

$C_{26}H_{24}N_6O_2S$

Molecular Weight: 484.57275

ALogP: 4.566

Rotatable Bonds: 6

Acceptors: 8

Donors: 1

## Model Prediction

Prediction: **Single-Carcinogen**

Probability: 0.148

Enrichment: 0.491

Bayesian Score: -10.9

Mahalanobis Distance: 18.7

Mahalanobis Distance p-value: 3.9e-009

Prediction: Positive if the Bayesian score is above the estimated best cutoff value from minimizing the false positive and false negative rate.

Probability: The estimated probability that the sample is in the positive category. This assumes that the Bayesian score follows a normal distribution and is different from the prediction using a cutoff.

Enrichment: An estimate of enrichment, that is, the increased likelihood (versus random) of this sample being in the category.

Bayesian Score: The standard Laplacian-modified Bayesian score.

Mahalanobis Distance: The Mahalanobis distance (MD) is the distance to the center of the training data. The larger the MD, the less trustworthy the prediction.

Mahalanobis Distance p-value: The p-value gives the fraction of training data with an MD greater than or equal to the one for the given sample, assuming normally distributed data. The smaller the p-value, the less trustworthy the prediction. For highly non-normal X properties (e.g., fingerprints), the MD p-value is wildly inaccurate.

## Structural Similar Compounds

| Name               | Simvastatin                                                         | Lovastatin                                                          | Reserpine                                                           |
|--------------------|---------------------------------------------------------------------|---------------------------------------------------------------------|---------------------------------------------------------------------|
| Structure          |                                                                     |                                                                     |                                                                     |
| Actual Endpoint    | Multiple-Carcinogen                                                 | Multiple-Carcinogen                                                 | Multiple-Carcinogen                                                 |
| Predicted Endpoint | Multiple-Carcinogen                                                 | Multiple-Carcinogen                                                 | Multiple-Carcinogen                                                 |
| Distance           | 0.833                                                               | 0.839                                                               | 0.854                                                               |
| Reference          | US FDA (Centre for Drug Eval.& Res./Off. Testing & Res.) Sept. 1997 | US FDA (Centre for Drug Eval.& Res./Off. Testing & Res.) Sept. 1997 | US FDA (Centre for Drug Eval.& Res./Off. Testing & Res.) Sept. 1997 |

## Model Applicability

Unknown features are fingerprint features in the query molecule, but not found or appearing too infrequently in the training set.

- OPS PC12 out of range. Value: 2.3509. Training min, max, SD, explained variance: -3.4599, 2.3291, 1.246, 0.0290.

## Feature Contribution

| Top features for positive contribution |            |                                                 |       |                                     |
|----------------------------------------|------------|-------------------------------------------------|-------|-------------------------------------|
| Fingerprint                            | Bit/Smiles | Feature Structure                               | Score | Multiple-Carcinogen in training set |
| FCFP_12                                | 547884906  | <br><chem>[*][c]1:[*]:[cH]:[cH]:n:[cH]:1</chem> | 0.4   | 1 out of 1                          |



|                                        |             |                                                                                                                                                 |        |                                     |
|----------------------------------------|-------------|-------------------------------------------------------------------------------------------------------------------------------------------------|--------|-------------------------------------|
| FCFP_12                                | 565998553   | 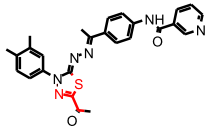<br><chem>[*]C(=[*])C1=N[*]I[*]S1</chem>                     | 0.194  | 6 out of 14                         |
| FCFP_12                                | 565968762   | <br><chem>[*]C(=[*])C(=O)C</chem>                            | 0.168  | 3 out of 7                          |
| Top Features for negative contribution |             |                                                                                                                                                 |        |                                     |
| Fingerprint                            | Bit/Smiles  | Feature Structure                                                                                                                               | Score  | Multiple-Carcinogen in training set |
| FCFP_12                                | 1294255210  | <br><chem>[*]C(=[*])N[c]([*]):[*]</chem>                     | -1.63  | 0 out of 12                         |
| FCFP_12                                | 590925877   | <br><chem>[*]N[c]([*]):[cH]:[*]:[cH]:[*]</chem>            | -0.998 | 1 out of 13                         |
| FCFP_12                                | -1838187238 | <br><chem>[*]C(=[*])N[c]1:[cH]:[cH]:[*]:[cH]:[cH]:1</chem> | -0.859 | 0 out of 4                          |



# Sorafenib

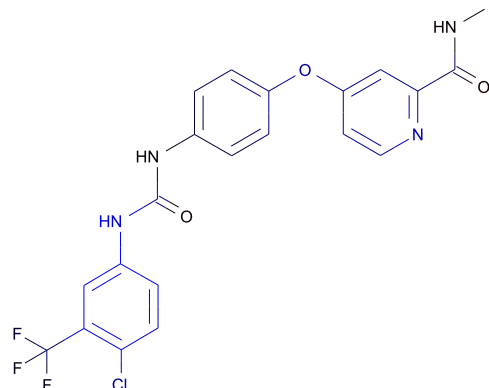

$C_{21}H_{16}ClF_3N_4O_3$

Molecular Weight: 464.82494

ALogP: 4.175

Rotatable Bonds: 6

Acceptors: 4

Donors: 3

## Model Prediction

Prediction: Single-Carcinogen

Probability: 0.139

Enrichment: 0.461

Bayesian Score: -14.7

Mahalanobis Distance: 21.3

Mahalanobis Distance p-value: 4.93e-011

Prediction: Positive if the Bayesian score is above the estimated best cutoff value from minimizing the false positive and false negative rate.

Probability: The estimated probability that the sample is in the positive category. This assumes that the Bayesian score follows a normal distribution and is different from the prediction using a cutoff.

Enrichment: An estimate of enrichment, that is, the increased likelihood (versus random) of this sample being in the category.

Bayesian Score: The standard Laplacian-modified Bayesian score.

Mahalanobis Distance: The Mahalanobis distance (MD) is the distance to the center of the training data. The larger the MD, the less trustworthy the prediction.

Mahalanobis Distance p-value: The p-value gives the fraction of training data with an MD greater than or equal to the one for the given sample, assuming normally distributed data. The smaller the p-value, the less trustworthy the prediction. For highly non-normal X properties (e.g., fingerprints), the MD p-value is wildly inaccurate.

# TOPKAT\_Mouse\_Male\_FDA\_Single\_vs\_Multiple

## Structural Similar Compounds

| Name               | Glimepiride                                                         | Bicalutamide                                                        | Lansoprazole                                                        |
|--------------------|---------------------------------------------------------------------|---------------------------------------------------------------------|---------------------------------------------------------------------|
| Structure          |                                                                     |                                                                     |                                                                     |
| Actual Endpoint    | Single-Carcinogen                                                   | Single-Carcinogen                                                   | Single-Carcinogen                                                   |
| Predicted Endpoint | Single-Carcinogen                                                   | Single-Carcinogen                                                   | Single-Carcinogen                                                   |
| Distance           | 0.626                                                               | 0.700                                                               | 0.866                                                               |
| Reference          | US FDA (Centre for Drug Eval.& Res./Off. Testing & Res.) Sept. 1997 | US FDA (Centre for Drug Eval.& Res./Off. Testing & Res.) Sept. 1997 | US FDA (Centre for Drug Eval.& Res./Off. Testing & Res.) Sept. 1997 |

## Model Applicability

Unknown features are fingerprint features in the query molecule, but not found or appearing too infrequently in the training set.

1. All properties and OPS components are within expected ranges.

## Feature Contribution

### Top features for positive contribution

| Fingerprint | Bit/Smiles | Feature Structure | Score | Multiple-Carcinogen in training set |
|-------------|------------|-------------------|-------|-------------------------------------|
| FCFP_12     | 1499521844 |                   | 0.39  | 5 out of 9                          |

[\*]NC(=O)N[\*]

|                                        |             |                                                                                                                                    |        |                                     |
|----------------------------------------|-------------|------------------------------------------------------------------------------------------------------------------------------------|--------|-------------------------------------|
| FCFP_12                                | -904785030  | 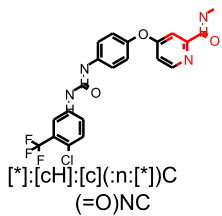<br>[*]:[cH]:[c](:n:[*])C<br>(=O)NC             | 0.174  | 1 out of 2                          |
| FCFP_12                                | -1549103449 | <br>[*]NC(=O)[c](:[*]):[*]<br>]                 | 0.168  | 3 out of 7                          |
| Top Features for negative contribution |             |                                                                                                                                    |        |                                     |
| Fingerprint                            | Bit/Smiles  | Feature Structure                                                                                                                  | Score  | Multiple-Carcinogen in training set |
| FCFP_12                                | 1294255210  | <br>[*]C(=[*])N[c](:[*]):<br>[*]                | -1.63  | 0 out of 12                         |
| FCFP_12                                | 590925877   | <br>[*]N[c](:[cH]:[*]):[c<br>H]:[*]           | -0.998 | 1 out of 13                         |
| FCFP_12                                | -1462709112 | <br>[*]C(=[*])[c]1:[cH]:[<br>*]:[cH]:[cH]:n:1 | -0.994 | 0 out of 5                          |



7a

## TOPKAT\_Ocular\_Irritancy\_Mild\_vs\_Moderate\_Severe

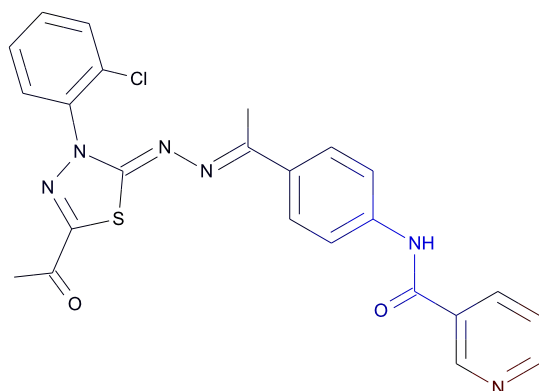C<sub>24</sub>H<sub>19</sub>ClN<sub>6</sub>O<sub>2</sub>S

Molecular Weight: 490.96466

ALogP: 4.258

Rotatable Bonds: 6

Acceptors: 8

Donors: 1

**Model Prediction**

Prediction: Mild

Probability: 0.629

Enrichment: 0.914

Bayesian Score: -4.62

Mahalanobis Distance: 11.2

Mahalanobis Distance p-value: 0.00185

Prediction: Positive if the Bayesian score is above the estimated best cutoff value from minimizing the false positive and false negative rate.

Probability: The estimated probability that the sample is in the positive category. This assumes that the Bayesian score follows a normal distribution and is different from the prediction using a cutoff.

Enrichment: An estimate of enrichment, that is, the increased likelihood (versus random) of this sample being in the category.

Bayesian Score: The standard Laplacian-modified Bayesian score.

Mahalanobis Distance: The Mahalanobis distance (MD) is the distance to the center of the training data. The larger the MD, the less trustworthy the prediction.

Mahalanobis Distance p-value: The p-value gives the fraction of training data with an MD greater than or equal to the one for the given sample, assuming normally distributed data. The smaller the p-value, the less trustworthy the prediction. For highly non-normal X properties (e.g., fingerprints), the MD p-value is wildly inaccurate.

**Structural Similar Compounds**

| Name               | COLCHICINE       | ANTHRAQUINONE; 1;1'-IMINODI- | 1;4-PENTADIENE-3-ONE;1;5-BIS(4-(2;3-DIDEHYDROTRIAZIRIDINYL)PHENYL)- |
|--------------------|------------------|------------------------------|---------------------------------------------------------------------|
| Structure          |                  |                              |                                                                     |
| Actual Endpoint    | Moderate_Severe  | Mild                         | Mild                                                                |
| Predicted Endpoint | Moderate_Severe  | Mild                         | Mild                                                                |
| Distance           | 0.763            | 0.804                        | 0.853                                                               |
| Reference          | AJOPAA 31;837;48 | 28ZPAK-;125;72               | 28ZPAK-;123;72                                                      |

**Model Applicability**

Unknown features are fingerprint features in the query molecule, but not found or appearing too infrequently in the training set.

1. All properties and OPS components are within expected ranges.

**Feature Contribution**

| Top features for positive contribution |            |                                                 |       |                                 |
|----------------------------------------|------------|-------------------------------------------------|-------|---------------------------------|
| Fingerprint                            | Bit/Smiles | Feature Structure                               | Score | Moderate_Severe in training set |
| FCFP_10                                | 547884906  | <br><chem>[*][c]1:[*]:[cH]:[cH]:n:[cH]:1</chem> | 0.317 | 4 out of 4                      |

|                                        |             |                                                                                                                                          |        |                                 |
|----------------------------------------|-------------|------------------------------------------------------------------------------------------------------------------------------------------|--------|---------------------------------|
| FCFP_10                                | -1695756380 | 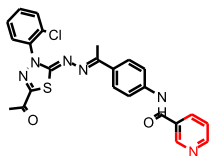<br>[*]1:[cH]:[cH]:[cH]:n<br>:[cH]:1                  | 0.285  | 10 out of 11                    |
| FCFP_10                                | -124655670  | <br>[*][c](:[*]):[cH]:n:[*]                           | 0.259  | 14 out of 16                    |
| Top Features for negative contribution |             |                                                                                                                                          |        |                                 |
| Fingerprint                            | Bit/Smiles  | Feature Structure                                                                                                                        | Score  | Moderate_Severe in training set |
| FCFP_10                                | 1175232969  | <br>[*]:[cH]:[c](NC(=O)[c](:[*]):[*]):[cH]:[*]        | -1.29  | 0 out of 4                      |
| FCFP_10                                | -1925475824 | <br>[*]:[cH]:[c](:[cH]:[*])C(=O)N[c](:[*]):[*]       | -1.29  | 0 out of 4                      |
| FCFP_10                                | -759256695  | <br>[*]=C1[*][*]=NN1[c]2:[cH]:[cH]:[*]:[cH]:[c]:2Cl | -0.507 | 0 out of 1                      |

7b

## TOPKAT\_Ocular\_Irritancy\_Mild\_vs\_Moderate\_Severe

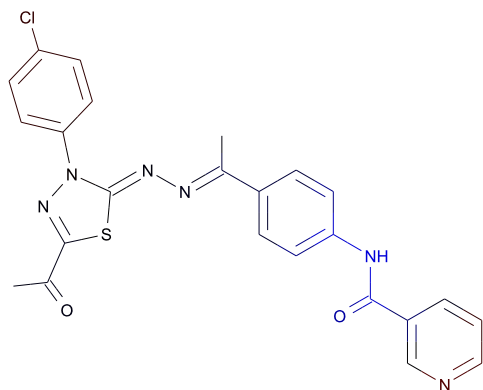C<sub>24</sub>H<sub>19</sub>ClN<sub>6</sub>O<sub>2</sub>S

Molecular Weight: 490.96465

ALogP: 4.258

Rotatable Bonds: 6

Acceptors: 8

Donors: 1

**Model Prediction**

Prediction: Mild

Probability: 0.722

Enrichment: 1.05

Bayesian Score: -3.11

Mahalanobis Distance: 11.2

Mahalanobis Distance p-value: 0.00185

Prediction: Positive if the Bayesian score is above the estimated best cutoff value from minimizing the false positive and false negative rate.

Probability: The estimated probability that the sample is in the positive category. This assumes that the Bayesian score follows a normal distribution and is different from the prediction using a cutoff.

Enrichment: An estimate of enrichment, that is, the increased likelihood (versus random) of this sample being in the category.

Bayesian Score: The standard Laplacian-modified Bayesian score.

Mahalanobis Distance: The Mahalanobis distance (MD) is the distance to the center of the training data. The larger the MD, the less trustworthy the prediction.

Mahalanobis Distance p-value: The p-value gives the fraction of training data with an MD greater than or equal to the one for the given sample, assuming normally distributed data. The smaller the p-value, the less trustworthy the prediction. For highly non-normal X properties (e.g., fingerprints), the MD p-value is wildly inaccurate.

**Structural Similar Compounds**

| Name               | COLCHICINE       | ANTHRAQUINONE; 1;1'-IMINODI- | 1;4-PENTADIENE-3-ONE;1;5-BIS(4-(2;3-DIDEHYDROTRIAZIRIDINYL)PHENYL)- |
|--------------------|------------------|------------------------------|---------------------------------------------------------------------|
| Structure          |                  |                              |                                                                     |
| Actual Endpoint    | Moderate_Severe  | Mild                         | Mild                                                                |
| Predicted Endpoint | Moderate_Severe  | Mild                         | Mild                                                                |
| Distance           | 0.763            | 0.808                        | 0.853                                                               |
| Reference          | AJOPAA 31;837;48 | 28ZPAK-;125;72               | 28ZPAK-;123;72                                                      |

**Model Applicability**

Unknown features are fingerprint features in the query molecule, but not found or appearing too infrequently in the training set.

1. All properties and OPS components are within expected ranges.

**Feature Contribution**

| Top features for positive contribution |             |                                                        |       |                                 |
|----------------------------------------|-------------|--------------------------------------------------------|-------|---------------------------------|
| Fingerprint                            | Bit/Smiles  | Feature Structure                                      | Score | Moderate_Severe in training set |
| FCFP_10                                | -1508180856 | <br><chem>[*][c]1:[cH]:[cH]:[c](Cl):[cH]:[cH]:1</chem> | 0.329 | 16 out of 17                    |



|                                        |             |                                                                                                                                                |        |                                 |
|----------------------------------------|-------------|------------------------------------------------------------------------------------------------------------------------------------------------|--------|---------------------------------|
| FCFP_10                                | 547884906   | 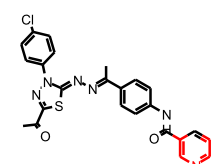<br>[*][c]1:[*]:[cH]:[cH]:n:[cH]:1                          | 0.317  | 4 out of 4                      |
| FCFP_10                                | -745491832  | <br>Cl[c]1:[cH]:[cH]:[*]:[cH]:[cH]:1                        | 0.304  | 29 out of 32                    |
| Top Features for negative contribution |             |                                                                                                                                                |        |                                 |
| Fingerprint                            | Bit/Smiles  | Feature Structure                                                                                                                              | Score  | Moderate_Severe in training set |
| FCFP_10                                | 1175232969  | <br>[*]:[cH]:[c](NC(=O)[c]([*])([*])[cH]:[*])               | -1.29  | 0 out of 4                      |
| FCFP_10                                | -1925475824 | <br>[*]:[cH]:[c](:[cH]:[*])C(=O)N[c](:[*]):[*]             | -1.29  | 0 out of 4                      |
| FCFP_10                                | -790336137  | <br>[*]C(=[*])N[c]1:[cH]:[cH]:[c](:[cH]:[cH]:1)C(=[*])[*] | -0.507 | 0 out of 1                      |

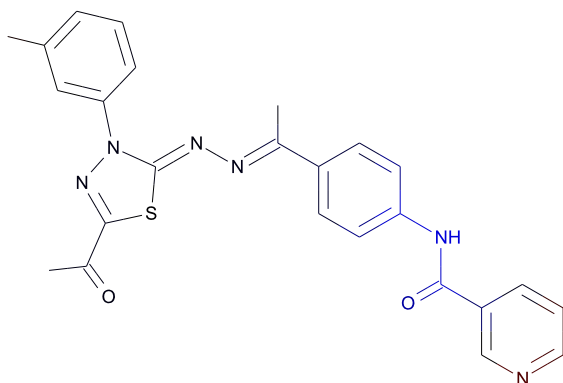

$C_{25}H_{22}N_6O_2S$

Molecular Weight: 470.54617

ALogP: 4.08

Rotatable Bonds: 6

Acceptors: 8

Donors: 1

## Model Prediction

Prediction: Mild

Probability: 0.664

Enrichment: 0.963

Bayesian Score: -4.12

Mahalanobis Distance: 10.7

Mahalanobis Distance p-value: 0.015

Prediction: Positive if the Bayesian score is above the estimated best cutoff value from minimizing the false positive and false negative rate.

Probability: The estimated probability that the sample is in the positive category. This assumes that the Bayesian score follows a normal distribution and is different from the prediction using a cutoff.

Enrichment: An estimate of enrichment, that is, the increased likelihood (versus random) of this sample being in the category.

Bayesian Score: The standard Laplacian-modified Bayesian score.

Mahalanobis Distance: The Mahalanobis distance (MD) is the distance to the center of the training data. The larger the MD, the less trustworthy the prediction.

Mahalanobis Distance p-value: The p-value gives the fraction of training data with an MD greater than or equal to the one for the given sample, assuming normally distributed data. The smaller the p-value, the less trustworthy the prediction. For highly non-normal X properties (e.g., fingerprints), the MD p-value is wildly inaccurate.

## Structural Similar Compounds

| Name               | COLCHICINE       | ANTHRAQUINONE; 1;1'-IMINODI- | 1;4-PENTADIENE-3-ONE;1;5-BIS(4-(2;3-DIDEHYDROTRIAZIRIDINYL)PHENYL)- |
|--------------------|------------------|------------------------------|---------------------------------------------------------------------|
| Structure          |                  |                              |                                                                     |
| Actual Endpoint    | Moderate_Severe  | Mild                         | Mild                                                                |
| Predicted Endpoint | Moderate_Severe  | Mild                         | Mild                                                                |
| Distance           | 0.726            | 0.801                        | 0.828                                                               |
| Reference          | AJOPAA 31;837;48 | 28ZPAK-;125;72               | 28ZPAK-;123;72                                                      |

## Model Applicability

Unknown features are fingerprint features in the query molecule, but not found or appearing too infrequently in the training set.

1. All properties and OPS components are within expected ranges.

## Feature Contribution

| Top features for positive contribution |            |                                    |       |                                 |
|----------------------------------------|------------|------------------------------------|-------|---------------------------------|
| Fingerprint                            | Bit/Smiles | Feature Structure                  | Score | Moderate_Severe in training set |
| FCFP_10                                | 547884906  | <br>[*][c]1:[*]:[cH]:[cH]:n:[cH]:1 | 0.317 | 4 out of 4                      |

|                                        |             |                                                                                                                                                             |        |                                 |
|----------------------------------------|-------------|-------------------------------------------------------------------------------------------------------------------------------------------------------------|--------|---------------------------------|
| FCFP_10                                | -1695756380 | 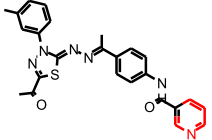<br><chem>[*]1:[cH]:[cH]:[cH]:n:[cH]:1</chem>                            | 0.285  | 10 out of 11                    |
| FCFP_10                                | -124655670  | <br><chem>[*][c](:[*]):[cH]:n:[*]</chem>                                 | 0.259  | 14 out of 16                    |
| Top Features for negative contribution |             |                                                                                                                                                             |        |                                 |
| Fingerprint                            | Bit/Smiles  | Feature Structure                                                                                                                                           | Score  | Moderate_Severe in training set |
| FCFP_10                                | -1925475824 | <br><chem>[*]:[cH]:[c](:[cH]):[*]]C(=O)N[c](:[*]):[*]</chem>             | -1.29  | 0 out of 4                      |
| FCFP_10                                | 1175232969  | <br><chem>[*]:[cH]:[c]([NC(=O)[c](:[*]):[*]):[cH]:[*]</chem>            | -1.29  | 0 out of 4                      |
| FCFP_10                                | -790336137  | <br><chem>[*]C(=[*])N[c]1:[cH]:[cH]:[c](:[cH]:[cH]:1)C(=[*])[*]</chem> | -0.507 | 0 out of 1                      |

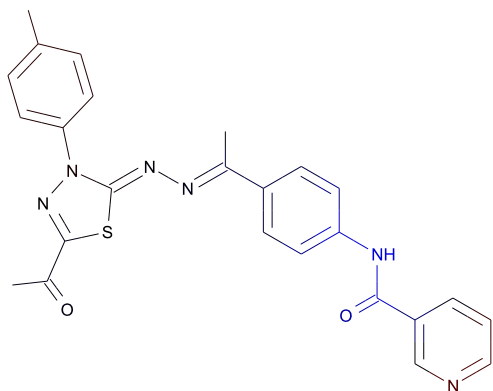

$C_{25}H_{22}N_6O_2S$

Molecular Weight: 470.54617

ALogP: 4.08

Rotatable Bonds: 6

Acceptors: 8

Donors: 1

## Model Prediction

Prediction: Mild

Probability: 0.717

Enrichment: 1.04

Bayesian Score: -3.2

Mahalanobis Distance: 10.7

Mahalanobis Distance p-value: 0.015

Prediction: Positive if the Bayesian score is above the estimated best cutoff value from minimizing the false positive and false negative rate.

Probability: The estimated probability that the sample is in the positive category. This assumes that the Bayesian score follows a normal distribution and is different from the prediction using a cutoff.

Enrichment: An estimate of enrichment, that is, the increased likelihood (versus random) of this sample being in the category.

Bayesian Score: The standard Laplacian-modified Bayesian score.

Mahalanobis Distance: The Mahalanobis distance (MD) is the distance to the center of the training data. The larger the MD, the less trustworthy the prediction.

Mahalanobis Distance p-value: The p-value gives the fraction of training data with an MD greater than or equal to the one for the given sample, assuming normally distributed data. The smaller the p-value, the less trustworthy the prediction. For highly non-normal X properties (e.g., fingerprints), the MD p-value is wildly inaccurate.

## Structural Similar Compounds

| Name               | COLCHICINE       | ANTHRAQUINONE; 1;1'-IMINODI- | 1;4-PENTADIENE-3-ONE;1;5-BIS(4-(2;3-DIDEHYDROTRIAZIRIDINYL)PHENYL)- |
|--------------------|------------------|------------------------------|---------------------------------------------------------------------|
| Structure          |                  |                              |                                                                     |
| Actual Endpoint    | Moderate_Severe  | Mild                         | Mild                                                                |
| Predicted Endpoint | Moderate_Severe  | Mild                         | Mild                                                                |
| Distance           | 0.729            | 0.804                        | 0.827                                                               |
| Reference          | AJOPAA 31;837;48 | 28ZPAK-;125;72               | 28ZPAK-;123;72                                                      |

## Model Applicability

Unknown features are fingerprint features in the query molecule, but not found or appearing too infrequently in the training set.

1. All properties and OPS components are within expected ranges.

## Feature Contribution

| Top features for positive contribution |            |                                                 |       |                                 |
|----------------------------------------|------------|-------------------------------------------------|-------|---------------------------------|
| Fingerprint                            | Bit/Smiles | Feature Structure                               | Score | Moderate_Severe in training set |
| FCFP_10                                | 547884906  | <br><chem>[*][c]1:[*]:[cH]:[cH]:n:[cH]:1</chem> | 0.317 | 4 out of 4                      |

|                                        |             |                                                                                                                                                |        |                                 |
|----------------------------------------|-------------|------------------------------------------------------------------------------------------------------------------------------------------------|--------|---------------------------------|
| FCFP_10                                | 633795852   | 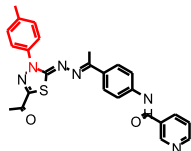<br>[*]N([*])[c]1:[cH]:[cH]:[cH]:[c](C):[cH]:[cH]:1         | 0.294  | 3 out of 3                      |
| FCFP_10                                | -1695756380 | <br>[*]1:[cH]:[cH]:[cH]:n:[cH]:1                            | 0.285  | 10 out of 11                    |
| Top Features for negative contribution |             |                                                                                                                                                |        |                                 |
| Fingerprint                            | Bit/Smiles  | Feature Structure                                                                                                                              | Score  | Moderate_Severe in training set |
| FCFP_10                                | 1175232969  | <br>[*]:[cH]:[c](NC(=O)[c]([*]):[*]):[cH]:[*]               | -1.29  | 0 out of 4                      |
| FCFP_10                                | -1925475824 | <br>[*]:[cH]:[c](:[cH]):[*]]C(=O)N[c]([*]):[*]             | -1.29  | 0 out of 4                      |
| FCFP_10                                | -790336137  | <br>[*]C(=[*])N[c]1:[cH]:[cH]:[c](:[cH]):[cH]:1C(=[*])[*] | -0.507 | 0 out of 1                      |

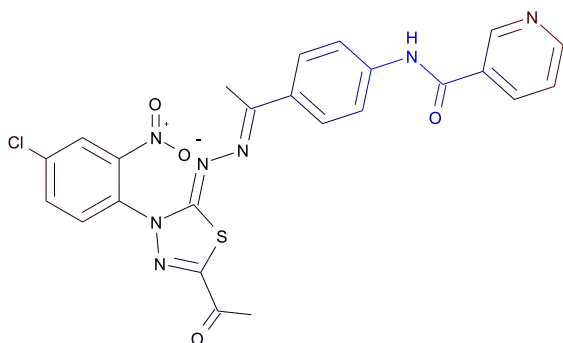

$C_{24}H_{18}ClN_7O_4S$

Molecular Weight: 535.96222

ALogP: 4.153

Rotatable Bonds: 7

Acceptors: 10

Donors: 1

## Model Prediction

Prediction: Mild

Probability: 0.709

Enrichment: 1.03

Bayesian Score: -3.36

Mahalanobis Distance: 12

Mahalanobis Distance p-value: 6.04e-005

Prediction: Positive if the Bayesian score is above the estimated best cutoff value from minimizing the false positive and false negative rate.

Probability: The estimated probability that the sample is in the positive category. This assumes that the Bayesian score follows a normal distribution and is different from the prediction using a cutoff.

Enrichment: An estimate of enrichment, that is, the increased likelihood (versus random) of this sample being in the category. Bayesian Score: The standard Laplacian-modified Bayesian score.

Mahalanobis Distance: The Mahalanobis distance (MD) is the distance to the center of the training data. The larger the MD, the less trustworthy the prediction.

Mahalanobis Distance p-value: The p-value gives the fraction of training data with an MD greater than or equal to the one for the given sample, assuming normally distributed data. The smaller the p-value, the less trustworthy the prediction. For highly non-normal X properties (e.g., fingerprints), the MD p-value is wildly inaccurate.

## Structural Similar Compounds

| Name               | COLCHICINE       | 2;2'-Stilbenedisulfonic acid; 4;4'-dinitro-                             | 2;7-Naphthalenedisulfonic acid;                                         |
|--------------------|------------------|-------------------------------------------------------------------------|-------------------------------------------------------------------------|
| Structure          |                  |                                                                         |                                                                         |
| Actual Endpoint    | Moderate_Severe  | Mild                                                                    | Moderate_Severe                                                         |
| Predicted Endpoint | Moderate_Severe  | Mild                                                                    | Moderate_Severe                                                         |
| Distance           | 0.929            | 0.955                                                                   | 0.984                                                                   |
| Reference          | AJOPAA 31;837;48 | Prehled Prumyslove Toxikologie; Organické Latky; Marhold; J. pp 1062;86 | Prehled Prumyslove Toxikologie; Organické Latky; Marhold; J. - ;1300;86 |

## Model Applicability

Unknown features are fingerprint features in the query molecule, but not found or appearing too infrequently in the training set.

1. All properties and OPS components are within expected ranges.
2. Unknown FCFP\_2 feature: -828984032: [\*][c](:[\*]):[c](:[cH]:[\*])[N+](=[\*])[\*]
3. Unknown FCFP\_2 feature: -1338588315: [\*]:[c](:[\*])[N+](=O)[O-]
4. Unknown FCFP\_2 feature: 1872392852: [\*][N+](=O)[\*]
5. Unknown FCFP\_2 feature: 260476081: [\*][N+](=[\*])[O-]

## Feature Contribution

### Top features for positive contribution

| Fingerprint | Bit/Smiles | Feature Structure | Score | Moderate_Severe in training set |
|-------------|------------|-------------------|-------|---------------------------------|
|             |            |                   |       |                                 |

|                                        |             |                                                                                                                                               |       |                                    |
|----------------------------------------|-------------|-----------------------------------------------------------------------------------------------------------------------------------------------|-------|------------------------------------|
| FCFP_10                                | 547884906   | 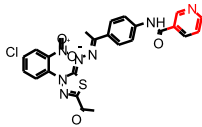<br>[*][c]1:[*]:[cH]:[cH]<br>:n:[cH]:1                     | 0.317 | 4 out of 4                         |
| FCFP_10                                | -745491832  | <br>Cl[c]1:[cH]:[cH]:[*]:<br>[cH]:[cH]:1                   | 0.304 | 29 out of 32                       |
| FCFP_10                                | -1695756380 | <br>[*]1:[cH]:[cH]:[cH]:n<br>:[cH]:1                       | 0.285 | 10 out of 11                       |
| Top Features for negative contribution |             |                                                                                                                                               |       |                                    |
| Fingerprint                            | Bit/Smiles  | Feature Structure                                                                                                                             | Score | Moderate_Severe<br>in training set |
| FCFP_10                                | -1925475824 | <br>[*]:[cH]:[c](:[cH]:[*]<br>))C(=O)N[c](:[*]):[*]<br>]  | -1.29 | 0 out of 4                         |
| FCFP_10                                | 1175232969  | <br>[*]:[cH]:[c](NC(=O)[c]<br>):([*]):[*]):[cH]:[*]<br>] | -1.29 | 0 out of 4                         |

FCFP\_10

-790336137

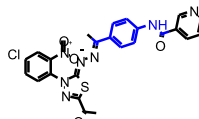

[\*]C(=[\*])N[c]1:[cH]:  
[cH]:[c](:[cH]:[cH]):  
1)C(=[\*])[\*]

-0.507

0 out of 1



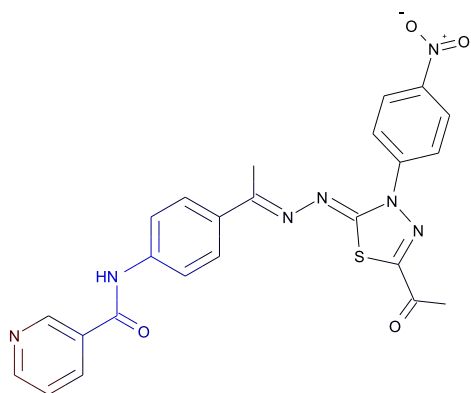

$C_{24}H_{19}N_7O_4S$

Molecular Weight: 501.51715

ALogP: 3.488

Rotatable Bonds: 7

Acceptors: 10

Donors: 1

## Model Prediction

Prediction: Mild

Probability: 0.67

Enrichment: 0.973

Bayesian Score: -4.02

Mahalanobis Distance: 11.3

Mahalanobis Distance p-value: 0.00137

Prediction: Positive if the Bayesian score is above the estimated best cutoff value from minimizing the false positive and false negative rate.

Probability: The estimated probability that the sample is in the positive category. This assumes that the Bayesian score follows a normal distribution and is different from the prediction using a cutoff.

Enrichment: An estimate of enrichment, that is, the increased likelihood (versus random) of this sample being in the category.

Bayesian Score: The standard Laplacian-modified Bayesian score.

Mahalanobis Distance: The Mahalanobis distance (MD) is the distance to the center of the training data. The larger the MD, the less trustworthy the prediction.

Mahalanobis Distance p-value: The p-value gives the fraction of training data with an MD greater than or equal to the one for the given sample, assuming normally distributed data. The smaller the p-value, the less trustworthy the prediction. For highly non-normal X properties (e.g., fingerprints), the MD p-value is wildly inaccurate.

## Structural Similar Compounds

| Name               | COLCHICINE       | 2;2'-Stilbenedisulfonic acid; 4;4'-dinitro-                             | 2;7-Naphthalenedisulfonic acid;                                         |
|--------------------|------------------|-------------------------------------------------------------------------|-------------------------------------------------------------------------|
| Structure          |                  |                                                                         |                                                                         |
| Actual Endpoint    | Moderate_Severe  | Mild                                                                    | Moderate_Severe                                                         |
| Predicted Endpoint | Moderate_Severe  | Mild                                                                    | Moderate_Severe                                                         |
| Distance           | 0.881            | 0.896                                                                   | 0.953                                                                   |
| Reference          | AJOPAA 31;837;48 | Prehled Prumyslove Toxikologie; Organické Latky; Marhold; J. pp 1062;86 | Prehled Prumyslove Toxikologie; Organické Latky; Marhold; J. - ;1300;86 |

## Model Applicability

Unknown features are fingerprint features in the query molecule, but not found or appearing too infrequently in the training set.

1. All properties and OPS components are within expected ranges.
2. Unknown FCFP\_2 feature: -828984032: [\*][c](:[\*]):[c](:[cH]:[\*])[N+](=[\*])[\*]
3. Unknown FCFP\_2 feature: -1338588315: [\*]:[c](:[\*])[N+](=O)[O-]
4. Unknown FCFP\_2 feature: 1872392852: [\*][N+](=O)[\*]
5. Unknown FCFP\_2 feature: 260476081: [\*][N+](=[\*])[O-]

## Feature Contribution

### Top features for positive contribution

| Fingerprint | Bit/Smiles | Feature Structure | Score | Moderate_Severe in training set |
|-------------|------------|-------------------|-------|---------------------------------|
|             |            |                   |       |                                 |

|                                        |             |                                                                                                                                      |       |                                 |
|----------------------------------------|-------------|--------------------------------------------------------------------------------------------------------------------------------------|-------|---------------------------------|
| FCFP_10                                | 547884906   | 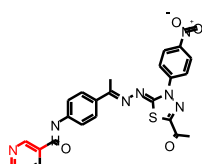<br>[*][c]1:[*]:[cH]:[cH]:n:[cH]:1                | 0.317 | 4 out of 4                      |
| FCFP_10                                | -1695756380 | <br>[*]1:[cH]:[cH]:[cH]:n:[cH]:1                  | 0.285 | 10 out of 11                    |
| FCFP_10                                | -124655670  | <br>[*][c](:[*]):[cH]:n:[*]                       | 0.259 | 14 out of 16                    |
| Top Features for negative contribution |             |                                                                                                                                      |       |                                 |
| Fingerprint                            | Bit/Smiles  | Feature Structure                                                                                                                    | Score | Moderate_Severe in training set |
| FCFP_10                                | 1175232969  | <br>[*]:[cH]:[c](NC(=O)[c]([c(*)]:[*]):[cH]:[*]) | -1.29 | 0 out of 4                      |
| FCFP_10                                | -1925475824 | <br>[*]:[cH]:[c](:[cH]:[*])C(=O)N[c](:[*]):[*]  | -1.29 | 0 out of 4                      |

|         |            |                                                                                                                                                                                                           |        |            |
|---------|------------|-----------------------------------------------------------------------------------------------------------------------------------------------------------------------------------------------------------|--------|------------|
| FCFP_10 | -790336137 | 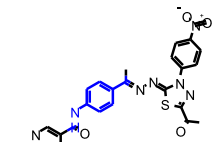 <p> <chem>[*]C(=O)N(c1ccccc1)1:1:[cH]:</chem><br/> <chem>[cH]:[c]:[cH]:[cH]:</chem><br/> <chem>1)C(=O)[*]</chem> </p> | -0.507 | 0 out of 1 |
|---------|------------|-----------------------------------------------------------------------------------------------------------------------------------------------------------------------------------------------------------|--------|------------|

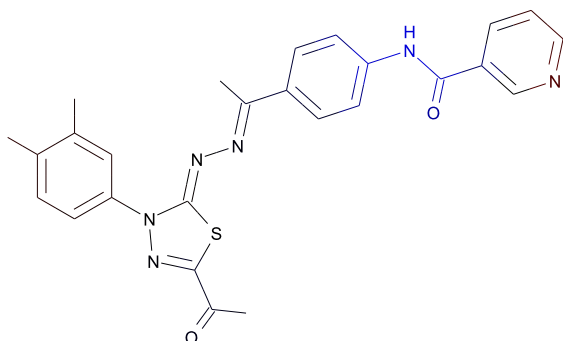

$C_{26}H_{24}N_6O_2S$

Molecular Weight: 484.57275

ALogP: 4.566

Rotatable Bonds: 6

Acceptors: 8

Donors: 1

## Model Prediction

Prediction: Mild

Probability: 0.716

Enrichment: 1.04

Bayesian Score: -3.23

Mahalanobis Distance: 10.8

Mahalanobis Distance p-value: 0.00942

Prediction: Positive if the Bayesian score is above the estimated best cutoff value from minimizing the false positive and false negative rate.

Probability: The estimated probability that the sample is in the positive category. This assumes that the Bayesian score follows a normal distribution and is different from the prediction using a cutoff.

Enrichment: An estimate of enrichment, that is, the increased likelihood (versus random) of this sample being in the category.

Bayesian Score: The standard Laplacian-modified Bayesian score.

Mahalanobis Distance: The Mahalanobis distance (MD) is the distance to the center of the training data. The larger the MD, the less trustworthy the prediction.

Mahalanobis Distance p-value: The p-value gives the fraction of training data with an MD greater than or equal to the one for the given sample, assuming normally distributed data. The smaller the p-value, the less trustworthy the prediction. For highly non-normal X properties (e.g., fingerprints), the MD p-value is wildly inaccurate.

## Structural Similar Compounds

| Name               | COLCHICINE       | ANTHRAQUINONE; 1;1'-IMINODI- | 1;4-PENTADIENE-3-ONE;1;5-BIS(4-(2;3-DIDEHYDROTRIAZIRIDINYL)PHENYL)- |
|--------------------|------------------|------------------------------|---------------------------------------------------------------------|
| Structure          |                  |                              |                                                                     |
| Actual Endpoint    | Moderate_Severe  | Mild                         | Mild                                                                |
| Predicted Endpoint | Moderate_Severe  | Mild                         | Mild                                                                |
| Distance           | 0.772            | 0.793                        | 0.843                                                               |
| Reference          | AJOPAA 31;837;48 | 28ZPAK-;125;72               | 28ZPAK-;123;72                                                      |

## Model Applicability

Unknown features are fingerprint features in the query molecule, but not found or appearing too infrequently in the training set.

1. All properties and OPS components are within expected ranges.

## Feature Contribution

| Top features for positive contribution |            |                                                 |       |                                 |
|----------------------------------------|------------|-------------------------------------------------|-------|---------------------------------|
| Fingerprint                            | Bit/Smiles | Feature Structure                               | Score | Moderate_Severe in training set |
| FCFP_10                                | 547884906  | <br><chem>[*][c]1:[*]:[cH]:[cH]:n:[cH]:1</chem> | 0.317 | 4 out of 4                      |

|                                        |             |                                                                                                                                                |        |                                 |
|----------------------------------------|-------------|------------------------------------------------------------------------------------------------------------------------------------------------|--------|---------------------------------|
| FCFP_10                                | -1695756380 | 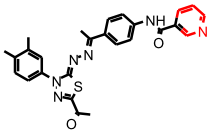<br>[*]1:[cH]:[cH]:[cH]:n<br>:[cH]:1                        | 0.285  | 10 out of 11                    |
| FCFP_10                                | -124655670  | <br>[*][c](:[*]):[cH]:n:[*]                                 | 0.259  | 14 out of 16                    |
| Top Features for negative contribution |             |                                                                                                                                                |        |                                 |
| Fingerprint                            | Bit/Smiles  | Feature Structure                                                                                                                              | Score  | Moderate_Severe in training set |
| FCFP_10                                | -1925475824 | <br>[*]:[cH]:[c](:[cH]:[*])C(=O)N[c](:[*]):[*]              | -1.29  | 0 out of 4                      |
| FCFP_10                                | 1175232969  | <br>[*]:[cH]:[c](NC(=O)[c](:[*]):[*]):[cH]:[*]             | -1.29  | 0 out of 4                      |
| FCFP_10                                | -790336137  | <br>[*]C(=[*])N[c]1:[cH]:[cH]:[c](:[cH]:[cH]:1)C(=[*])[*] | -0.507 | 0 out of 1                      |

# Sorafenib

# TOPKAT\_Ocular\_Irritancy\_Mild\_vs\_Moderate\_Severe

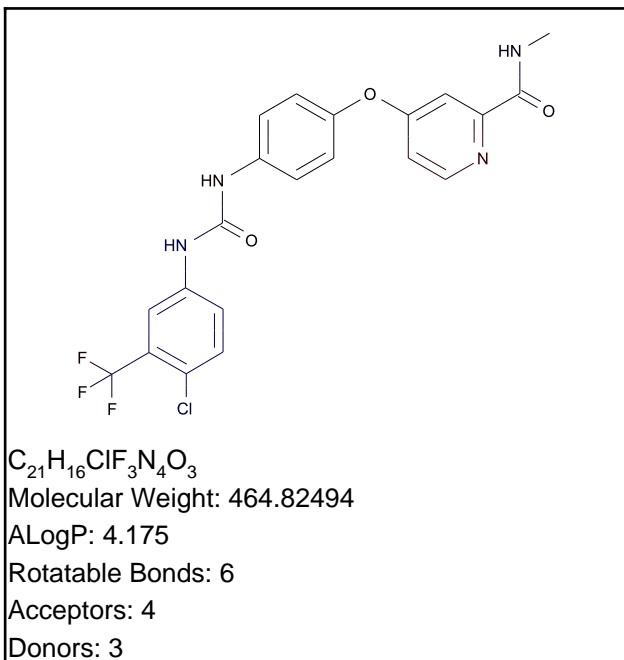

## Model Prediction

Prediction: Mild

Probability: 0.776

Enrichment: 1.13

Bayesian Score: -1.8

Mahalanobis Distance: 8.95

Mahalanobis Distance p-value: 0.537

Prediction: Positive if the Bayesian score is above the estimated best cutoff value from minimizing the false positive and false negative rate.

Probability: The estimated probability that the sample is in the positive category. This assumes that the Bayesian score follows a normal distribution and is different from the prediction using a cutoff.

Enrichment: An estimate of enrichment, that is, the increased likelihood (versus random) of this sample being in the category.

Bayesian Score: The standard Laplacian-modified Bayesian score.

Mahalanobis Distance: The Mahalanobis distance (MD) is the distance to the center of the training data. The larger the MD, the less trustworthy the prediction.

Mahalanobis Distance p-value: The p-value gives the fraction of training data with an MD greater than or equal to the one for the given sample, assuming normally distributed data. The smaller the p-value, the less trustworthy the prediction. For highly non-normal X properties (e.g., fingerprints), the MD p-value is wildly inaccurate.

## Structural Similar Compounds

| Name               | 4,4'-DIAMINO-1,1'-DIANTHRIMIDE                                                      | 5-NORBORNENE-2,3-DICARBOXYLIC ACID; 1;4;5;6;7;7-HEXACHLORO-                         | METHANE;TRIS(4-AMINOPHENYL)-                                                        |
|--------------------|-------------------------------------------------------------------------------------|-------------------------------------------------------------------------------------|-------------------------------------------------------------------------------------|
| Structure          | 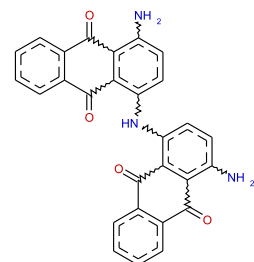 |  |  |
| Actual Endpoint    | Mild                                                                                | Moderate_Severe                                                                     | Moderate_Severe                                                                     |
| Predicted Endpoint | Mild                                                                                | Moderate_Severe                                                                     | Moderate_Severe                                                                     |
| Distance           | 0.799                                                                               | 0.816                                                                               | 0.827                                                                               |
| Reference          | 28ZPAK-;125;72                                                                      | 28ZPAK-;92;72                                                                       | 28ZPAK-;73;72                                                                       |

## Model Applicability

Unknown features are fingerprint features in the query molecule, but not found or appearing too infrequently in the training set.

- All properties and OPS components are within expected ranges.

## Feature Contribution

| Top features for positive contribution |             |                                                                                                                           |       |                                 |
|----------------------------------------|-------------|---------------------------------------------------------------------------------------------------------------------------|-------|---------------------------------|
| Fingerprint                            | Bit/Smiles  | Feature Structure                                                                                                         | Score | Moderate_Severe in training set |
| FCFP_10                                | -1695756380 | 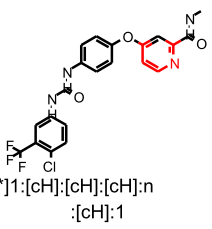<br>[*]1:[cH]:[cH]:[cH]:n<br>:[cH]:1 | 0.285 | 10 out of 11                    |

|                                        |             |                                                                                                                                                                |        |                                 |
|----------------------------------------|-------------|----------------------------------------------------------------------------------------------------------------------------------------------------------------|--------|---------------------------------|
| FCFP_10                                | -124655670  | 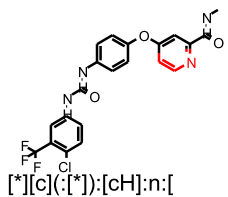<br><chem>[*][c](:[*]):[cH]:n:[*]</chem>                                    | 0.259  | 14 out of 16                    |
| FCFP_10                                | -885550502  | <br><chem>[*]C(=[*])NC</chem>                                               | 0.239  | 54 out of 64                    |
| Top Features for negative contribution |             |                                                                                                                                                                |        |                                 |
| Fingerprint                            | Bit/Smiles  | Feature Structure                                                                                                                                              | Score  | Moderate_Severe in training set |
| FCFP_10                                | 2104062943  | <br><chem>[*]C([*])([*])[c]1:[cH]:[*]:[cH]:[cH]:[c]:1Cl</chem>              | -0.745 | 7 out of 24                     |
| FCFP_10                                | -174293376  | <br><chem>[*]N([*])[*]:[cH]:[cH]:[c](Cl):[c](:[cH]:1)C([*])([*])[*]</chem> | -0.507 | 0 out of 1                      |
| FCFP_10                                | -1549103449 | <br><chem>[*]NC(=O)[c](:[*]):[*]</chem>                                   | -0.504 | 2 out of 6                      |

7a

## TOPKAT\_Ocular\_Irritancy\_None\_vs\_Irritant

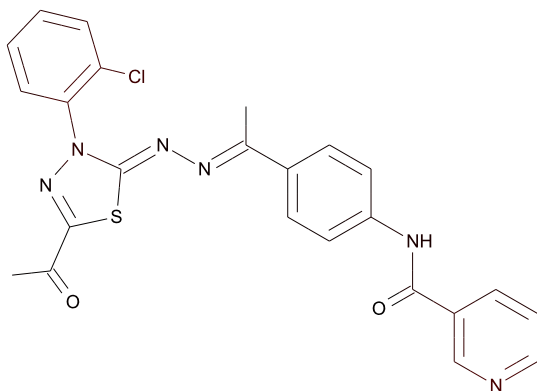C<sub>24</sub>H<sub>19</sub>ClN<sub>6</sub>O<sub>2</sub>S

Molecular Weight: 490.96466

ALogP: 4.258

Rotatable Bonds: 6

Acceptors: 8

Donors: 1

**Model Prediction****Prediction:** Irritant

Probability: 1

Enrichment: 1.18

Bayesian Score: 3.96

Mahalanobis Distance: 8.11

Mahalanobis Distance p-value: 0.898

Prediction: Positive if the Bayesian score is above the estimated best cutoff value from minimizing the false positive and false negative rate.

Probability: The estimated probability that the sample is in the positive category. This assumes that the Bayesian score follows a normal distribution and is different from the prediction using a cutoff.

Enrichment: An estimate of enrichment, that is, the increased likelihood (versus random) of this sample being in the category.

Bayesian Score: The standard Laplacian-modified Bayesian score.

Mahalanobis Distance: The Mahalanobis distance (MD) is the distance to the center of the training data. The larger the MD, the less trustworthy the prediction.

Mahalanobis Distance p-value: The p-value gives the fraction of training data with an MD greater than or equal to the one for the given sample, assuming normally distributed data. The smaller the p-value, the less trustworthy the prediction. For highly non-normal X properties (e.g., fingerprints), the MD p-value is wildly inaccurate.

**Structural Similar Compounds**

| Name               | COLCHICINE       | ANTHRAQUINONE; 1;1'-IMINODI- | 1;4-PENTADIENE-3-ONE;1;5-BIS(4-(2;3-DIDEHYDROTRIAZIRIDINYL)PHENYL)- |
|--------------------|------------------|------------------------------|---------------------------------------------------------------------|
| Structure          |                  |                              |                                                                     |
| Actual Endpoint    | Irritant         | Irritant                     | Irritant                                                            |
| Predicted Endpoint | Irritant         | Irritant                     | Irritant                                                            |
| Distance           | 0.742            | 0.791                        | 0.844                                                               |
| Reference          | AJOPAA 31;837;48 | 28ZPAK-;125;72               | 28ZPAK-;123;72                                                      |

**Model Applicability**

Unknown features are fingerprint features in the query molecule, but not found or appearing too infrequently in the training set.

1. All properties and OPS components are within expected ranges.

**Feature Contribution**

| Top features for positive contribution |            |                                      |       |                          |
|----------------------------------------|------------|--------------------------------------|-------|--------------------------|
| Fingerprint                            | Bit/Smiles | Feature Structure                    | Score | Irritant in training set |
| FCFP_12                                | 1747237384 | <br><chem>[*]:[cH]:n:[cH]:[*]</chem> | 0.208 | 44 out of 44             |



|                                        |            |                                                                                                                                              |         |                          |
|----------------------------------------|------------|----------------------------------------------------------------------------------------------------------------------------------------------|---------|--------------------------|
| FCFP_12                                | -124655670 | 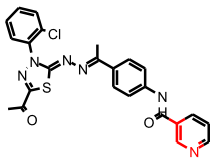<br><chem>[*][c](:[*]):[cH]:n:[*]</chem>                  | 0.2     | 16 out of 16             |
| FCFP_12                                | -62776068  | <br><chem>[*]N([*])[c]1:[cH]:[*]:[cH]:[cH]:[c]:1Cl</chem> | 0.197   | 13 out of 13             |
| Top Features for negative contribution |            |                                                                                                                                              |         |                          |
| Fingerprint                            | Bit/Smiles | Feature Structure                                                                                                                            | Score   | Irritant in training set |
| FCFP_12                                | 565998553  | <br><chem>[*]C(=[*])C1=N[*]I[*]S1</chem>                  | -0.0662 | 198 out of 262           |
| FCFP_12                                | 0          | <br><chem>[*]C(=[*])[*]</chem>                           | 0       | 1184 out of 1397         |
| FCFP_12                                | 1          | <br><chem>[*]=O</chem>                                  | 0       | 872 out of 1051          |

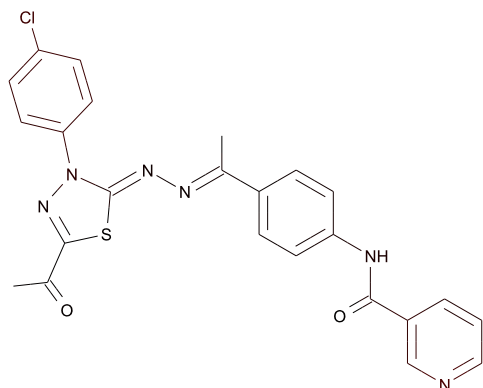

$C_{24}H_{19}ClN_6O_2S$

Molecular Weight: 490.96465

ALogP: 4.258

Rotatable Bonds: 6

Acceptors: 8

Donors: 1

## Model Prediction

**Prediction:** Irritant

Probability: 1

Enrichment: 1.18

Bayesian Score: 4.06

Mahalanobis Distance: 8.11

Mahalanobis Distance p-value: 0.898

Prediction: Positive if the Bayesian score is above the estimated best cutoff value from minimizing the false positive and false negative rate.

Probability: The estimated probability that the sample is in the positive category. This assumes that the Bayesian score follows a normal distribution and is different from the prediction using a cutoff.

Enrichment: An estimate of enrichment, that is, the increased likelihood (versus random) of this sample being in the category.

Bayesian Score: The standard Laplacian-modified Bayesian score.

Mahalanobis Distance: The Mahalanobis distance (MD) is the distance to the center of the training data. The larger the MD, the less trustworthy the prediction.

Mahalanobis Distance p-value: The p-value gives the fraction of training data with an MD greater than or equal to the one for the given sample, assuming normally distributed data. The smaller the p-value, the less trustworthy the prediction. For highly non-normal X properties (e.g., fingerprints), the MD p-value is wildly inaccurate.

## Structural Similar Compounds

| Name               | COLCHICINE       | ANTHRAQUINONE; 1;1'-IMINODI- | 1;4-PENTADIENE-3-ONE;1;5-BIS(4-(2;3-DIDEHYDROTRIAZIRIDINYL)PHENYL)- |
|--------------------|------------------|------------------------------|---------------------------------------------------------------------|
| Structure          |                  |                              |                                                                     |
| Actual Endpoint    | Irritant         | Irritant                     | Irritant                                                            |
| Predicted Endpoint | Irritant         | Irritant                     | Irritant                                                            |
| Distance           | 0.742            | 0.795                        | 0.844                                                               |
| Reference          | AJOPAA 31;837;48 | 28ZPAK-;125;72               | 28ZPAK-;123;72                                                      |

## Model Applicability

Unknown features are fingerprint features in the query molecule, but not found or appearing too infrequently in the training set.

1. All properties and OPS components are within expected ranges.

## Feature Contribution

| Top features for positive contribution |            |                                      |       |                          |
|----------------------------------------|------------|--------------------------------------|-------|--------------------------|
| Fingerprint                            | Bit/Smiles | Feature Structure                    | Score | Irritant in training set |
| FCFP_12                                | 1747237384 | <br><chem>[*]:[cH]:n:[cH]:[*]</chem> | 0.208 | 44 out of 44             |

|                                        |             |                                                                                                                                    |         |                          |
|----------------------------------------|-------------|------------------------------------------------------------------------------------------------------------------------------------|---------|--------------------------|
| FCFP_12                                | -1508180856 | 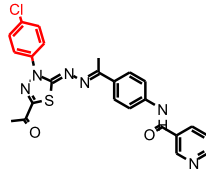<br>[*][c]1:[cH]:[cH]:[c]<br>(Cl):[cH]:[cH]:1   | 0.2     | 17 out of 17             |
| FCFP_12                                | -124655670  | <br>[*][c](:[*]):[cH]:n:[*]                     | 0.2     | 16 out of 16             |
| Top Features for negative contribution |             |                                                                                                                                    |         |                          |
| Fingerprint                            | Bit/Smiles  | Feature Structure                                                                                                                  | Score   | Irritant in training set |
| FCFP_12                                | 565998553   | <br>[*]C(=[*])C1=N[*][*]S1                      | -0.0662 | 198 out of 262           |
| FCFP_12                                | -773983804  | <br>[*]N[c]1:[cH]:[*]:[c]<br>([*]):[cH]:[cH]:1 | 0       | 102 out of 121           |
| FCFP_12                                | 1175232969  | <br>[*]:[cH]:[c](NC(=O)[c]([*]):[*]):[cH]:[*] | 0       | 4 out of 5               |

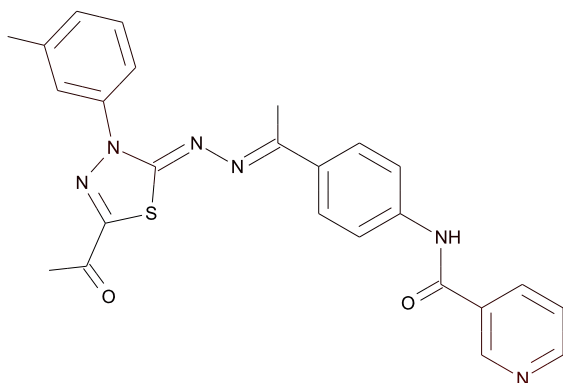

$C_{25}H_{22}N_6O_2S$

Molecular Weight: 470.54617

ALogP: 4.08

Rotatable Bonds: 6

Acceptors: 8

Donors: 1

## Model Prediction

**Prediction: Irritant**

Probability: 1

Enrichment: 1.18

Bayesian Score: 3.34

Mahalanobis Distance: 8.04

Mahalanobis Distance p-value: 0.916

Prediction: Positive if the Bayesian score is above the estimated best cutoff value from minimizing the false positive and false negative rate.

Probability: The estimated probability that the sample is in the positive category. This assumes that the Bayesian score follows a normal distribution and is different from the prediction using a cutoff.

Enrichment: An estimate of enrichment, that is, the increased likelihood (versus random) of this sample being in the category.

Bayesian Score: The standard Laplacian-modified Bayesian score.

Mahalanobis Distance: The Mahalanobis distance (MD) is the distance to the center of the training data. The larger the MD, the less trustworthy the prediction.

Mahalanobis Distance p-value: The p-value gives the fraction of training data with an MD greater than or equal to the one for the given sample, assuming normally distributed data. The smaller the p-value, the less trustworthy the prediction. For highly non-normal X properties (e.g., fingerprints), the MD p-value is wildly inaccurate.

## Structural Similar Compounds

| Name               | COLCHICINE       | ANTHRAQUINONE; 1;1'-IMINODI- | 1;4-PENTADIENE-3-ONE;1;5-BIS(4-(2;3-DIDEHYDROTRIAZIRIDINYL)PHENYL)- |
|--------------------|------------------|------------------------------|---------------------------------------------------------------------|
| Structure          |                  |                              |                                                                     |
| Actual Endpoint    | Irritant         | Irritant                     | Irritant                                                            |
| Predicted Endpoint | Irritant         | Irritant                     | Irritant                                                            |
| Distance           | 0.708            | 0.786                        | 0.820                                                               |
| Reference          | AJOPAA 31;837;48 | 28ZPAK-;125;72               | 28ZPAK-;123;72                                                      |

## Model Applicability

Unknown features are fingerprint features in the query molecule, but not found or appearing too infrequently in the training set.

1. All properties and OPS components are within expected ranges.

## Feature Contribution

| Top features for positive contribution |            |                         |       |                          |
|----------------------------------------|------------|-------------------------|-------|--------------------------|
| Fingerprint                            | Bit/Smiles | Feature Structure       | Score | Irritant in training set |
| FCFP_12                                | 1747237384 | <br>[*]:[cH]:n:[cH]:[*] | 0.208 | 44 out of 44             |

|                                        |             |                                                                                                                                         |         |                          |
|----------------------------------------|-------------|-----------------------------------------------------------------------------------------------------------------------------------------|---------|--------------------------|
| FCFP_12                                | -124655670  | 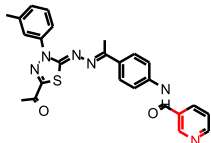<br><chem>[*][c](:[*]):[cH]:n:[*]</chem>             | 0.2     | 16 out of 16             |
| FCFP_12                                | -1695756380 | <br><chem>[*]1:[cH]:[cH]:[cH]:n:[cH]:1</chem>        | 0.194   | 11 out of 11             |
| Top Features for negative contribution |             |                                                                                                                                         |         |                          |
| Fingerprint                            | Bit/Smiles  | Feature Structure                                                                                                                       | Score   | Irritant in training set |
| FCFP_12                                | 565998553   | <br><chem>[*]C(=[*])C1=N[*]1[*]S1</chem>             | -0.0662 | 198 out of 262           |
| FCFP_12                                | 1           | <br><chem>[*]=O</chem>                              | 0       | 872 out of 1051          |
| FCFP_12                                | 203677720   | <br><chem>[*]C(=[*])[c](:[cH]:[*]):[cH]:[*]</chem> | 0       | 319 out of 382           |

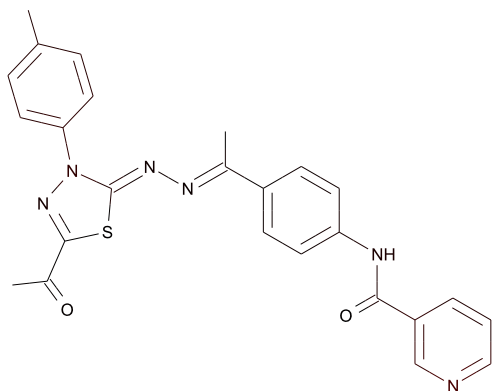

$C_{25}H_{22}N_6O_2S$

Molecular Weight: 470.54617

ALogP: 4.08

Rotatable Bonds: 6

Acceptors: 8

Donors: 1

## Model Prediction

**Prediction:** Irritant

Probability: 1

Enrichment: 1.18

Bayesian Score: 3.45

Mahalanobis Distance: 8.04

Mahalanobis Distance p-value: 0.916

Prediction: Positive if the Bayesian score is above the estimated best cutoff value from minimizing the false positive and false negative rate.

Probability: The estimated probability that the sample is in the positive category. This assumes that the Bayesian score follows a normal distribution and is different from the prediction using a cutoff.

Enrichment: An estimate of enrichment, that is, the increased likelihood (versus random) of this sample being in the category.

Bayesian Score: The standard Laplacian-modified Bayesian score.

Mahalanobis Distance: The Mahalanobis distance (MD) is the distance to the center of the training data. The larger the MD, the less trustworthy the prediction.

Mahalanobis Distance p-value: The p-value gives the fraction of training data with an MD greater than or equal to the one for the given sample, assuming normally distributed data. The smaller the p-value, the less trustworthy the prediction. For highly non-normal X properties (e.g., fingerprints), the MD p-value is wildly inaccurate.

## Structural Similar Compounds

| Name               | COLCHICINE       | ANTHRAQUINONE; 1;1'-IMINODI- | 1;4-PENTADIENE-3-ONE;1;5-BIS(4-(2;3-DIDEHYDROTRIAZIRIDINYL)PHENYL)- |
|--------------------|------------------|------------------------------|---------------------------------------------------------------------|
| Structure          |                  |                              |                                                                     |
| Actual Endpoint    | Irritant         | Irritant                     | Irritant                                                            |
| Predicted Endpoint | Irritant         | Irritant                     | Irritant                                                            |
| Distance           | 0.711            | 0.790                        | 0.820                                                               |
| Reference          | AJOPAA 31;837;48 | 28ZPAK-;125;72               | 28ZPAK-;123;72                                                      |

## Model Applicability

Unknown features are fingerprint features in the query molecule, but not found or appearing too infrequently in the training set.

1. All properties and OPS components are within expected ranges.

## Feature Contribution

| Top features for positive contribution |            |                            |       |                          |
|----------------------------------------|------------|----------------------------|-------|--------------------------|
| Fingerprint                            | Bit/Smiles | Feature Structure          | Score | Irritant in training set |
| FCFP_12                                | 1747237384 | <p>[*]:[cH]:n:[cH]:[*]</p> | 0.208 | 44 out of 44             |

|                                        |             |                                                                                                                                         |         |                          |
|----------------------------------------|-------------|-----------------------------------------------------------------------------------------------------------------------------------------|---------|--------------------------|
| FCFP_12                                | -124655670  | 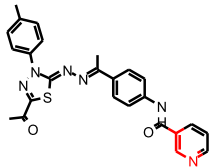<br><chem>[*][c](:[*]):[cH]:n:[*]</chem>             | 0.2     | 16 out of 16             |
| FCFP_12                                | -1695756380 | <br><chem>[*]1:[cH]:[cH]:[cH]:n:[cH]:1</chem>        | 0.194   | 11 out of 11             |
| Top Features for negative contribution |             |                                                                                                                                         |         |                          |
| Fingerprint                            | Bit/Smiles  | Feature Structure                                                                                                                       | Score   | Irritant in training set |
| FCFP_12                                | 565998553   | <br><chem>[*]C(=[*])C1=N[*][*]S1</chem>              | -0.0662 | 198 out of 262           |
| FCFP_12                                | 1           | <br><chem>[*]=O</chem>                              | 0       | 872 out of 1051          |
| FCFP_12                                | 203677720   | <br><chem>[*]C(=[*])[c](:[cH]:[*]):[cH]:[*]</chem> | 0       | 319 out of 382           |

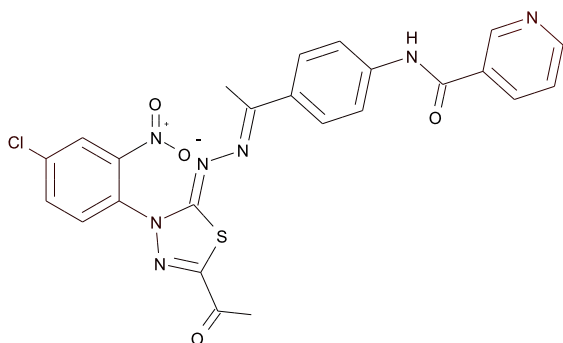

$C_{24}H_{18}ClN_7O_4S$

Molecular Weight: 535.96222

ALogP: 4.153

Rotatable Bonds: 7

Acceptors: 10

Donors: 1

## Model Prediction

**Prediction: Irritant**

Probability: 1

Enrichment: 1.18

Bayesian Score: 3.67

Mahalanobis Distance: 8.87

Mahalanobis Distance p-value: 0.585

Prediction: Positive if the Bayesian score is above the estimated best cutoff value from minimizing the false positive and false negative rate.

Probability: The estimated probability that the sample is in the positive category. This assumes that the Bayesian score follows a normal distribution and is different from the prediction using a cutoff.

Enrichment: An estimate of enrichment, that is, the increased likelihood (versus random) of this sample being in the category. Bayesian Score: The standard Laplacian-modified Bayesian score.

Mahalanobis Distance: The Mahalanobis distance (MD) is the distance to the center of the training data. The larger the MD, the less trustworthy the prediction.

Mahalanobis Distance p-value: The p-value gives the fraction of training data with an MD greater than or equal to the one for the given sample, assuming normally distributed data. The smaller the p-value, the less trustworthy the prediction. For highly non-normal X properties (e.g., fingerprints), the MD p-value is wildly inaccurate.

## Structural Similar Compounds

| Name               | COLCHICINE       | 2;2'-Stilbenedisulfonic acid; 4;4'-dinitro-                             | 2;7-Naphthalenedisulfonic acid;                                         |
|--------------------|------------------|-------------------------------------------------------------------------|-------------------------------------------------------------------------|
| Structure          |                  |                                                                         |                                                                         |
| Actual Endpoint    | Irritant         | Irritant                                                                | Irritant                                                                |
| Predicted Endpoint | Irritant         | Irritant                                                                | Irritant                                                                |
| Distance           | 0.909            | 0.947                                                                   | 0.958                                                                   |
| Reference          | AJOPAA 31;837;48 | Prehled Prumyslove Toxikologie; Organické Latky; Marhold; J. pp 1062;86 | Prehled Prumyslove Toxikologie; Organické Latky; Marhold; J. - ;1300;86 |

## Model Applicability

Unknown features are fingerprint features in the query molecule, but not found or appearing too infrequently in the training set.

1. All properties and OPS components are within expected ranges.
2. Unknown FCFP\_2 feature: -828984032: [\*][c](:[\*]):[c](:[cH]:[\*])[N+](=[\*])[\*]
3. Unknown FCFP\_2 feature: -1338588315: [\*]:[c](:[\*])[N+](=O)[O-]
4. Unknown FCFP\_2 feature: 1872392852: [\*][N+](=O)[\*]
5. Unknown FCFP\_2 feature: 260476081: [\*][N+](=[\*])[O-]

## Feature Contribution

### Top features for positive contribution

| Fingerprint | Bit/Smiles | Feature Structure | Score | Irritant in training set |
|-------------|------------|-------------------|-------|--------------------------|
|             |            |                   |       |                          |



|                                        |             |                                                                                                                     |         |                          |
|----------------------------------------|-------------|---------------------------------------------------------------------------------------------------------------------|---------|--------------------------|
| FCFP_12                                | 1747237384  | 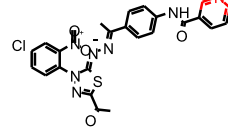<br>[*]:[cH]:n:[cH]:[*]          | 0.208   | 44 out of 44             |
| FCFP_12                                | -124655670  | <br>[*][c](:[*]):[cH]:n:[*]      | 0.2     | 16 out of 16             |
| FCFP_12                                | -1695756380 | <br>[*]1:[cH]:[cH]:[cH]:n:[cH]:1 | 0.194   | 11 out of 11             |
| Top Features for negative contribution |             |                                                                                                                     |         |                          |
| Fingerprint                            | Bit/Smiles  | Feature Structure                                                                                                   | Score   | Irritant in training set |
| FCFP_12                                | 565998553   | <br>[*]C(=[*])C1=N[*]1[*]S1    | -0.0662 | 198 out of 262           |
| FCFP_12                                | 8           | <br>[*][N+](=[*])[*]           | -0.0561 | 3 out of 4               |

FCFP\_12

203677720

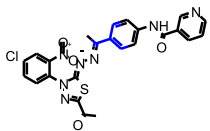

0

319 out of 382

[\*]C(=[\*])[c](:[cH]:[  
\*]):[cH]:[\*]

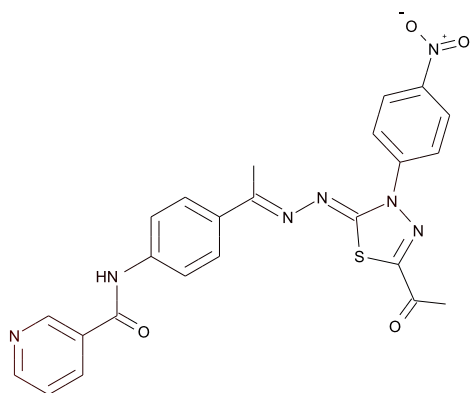

$C_{24}H_{19}N_7O_4S$

Molecular Weight: 501.51715

ALogP: 3.488

Rotatable Bonds: 7

Acceptors: 10

Donors: 1

## Model Prediction

**Prediction: Irritant**

Probability: 1

Enrichment: 1.18

Bayesian Score: 2.8

Mahalanobis Distance: 8.74

Mahalanobis Distance p-value: 0.65

Prediction: Positive if the Bayesian score is above the estimated best cutoff value from minimizing the false positive and false negative rate.

Probability: The estimated probability that the sample is in the positive category. This assumes that the Bayesian score follows a normal distribution and is different from the prediction using a cutoff.

Enrichment: An estimate of enrichment, that is, the increased likelihood (versus random) of this sample being in the category. Bayesian Score: The standard Laplacian-modified Bayesian score.

Mahalanobis Distance: The Mahalanobis distance (MD) is the distance to the center of the training data. The larger the MD, the less trustworthy the prediction.

Mahalanobis Distance p-value: The p-value gives the fraction of training data with an MD greater than or equal to the one for the given sample, assuming normally distributed data. The smaller the p-value, the less trustworthy the prediction. For highly non-normal X properties (e.g., fingerprints), the MD p-value is wildly inaccurate.

## Structural Similar Compounds

| Name               | COLCHICINE       | 2;2'-Stilbenedisulfonic acid; 4;4'-dinitro-                             | 2H-Naphtho(1;2-d)triazole-6;8-disulfonic acid;                          |
|--------------------|------------------|-------------------------------------------------------------------------|-------------------------------------------------------------------------|
| Structure          |                  |                                                                         |                                                                         |
| Actual Endpoint    | Irritant         | Irritant                                                                | Irritant                                                                |
| Predicted Endpoint | Irritant         | Irritant                                                                | Irritant                                                                |
| Distance           | 0.869            | 0.895                                                                   | 0.905                                                                   |
| Reference          | AJOPAA 31;837;48 | Prehled Prumyslove Toxikologie; Organické Latky; Marhold; J. pp 1062;86 | Prehled Prumyslove Toxikologie; Organické Latky; Marhold; J. pp 1065;86 |

## Model Applicability

Unknown features are fingerprint features in the query molecule, but not found or appearing too infrequently in the training set.

1. All properties and OPS components are within expected ranges.
2. Unknown FCFP\_2 feature: -828984032: [\*][c](:[\*]):[c](:[cH]:[\*])[N+](=[\*])[\*]
3. Unknown FCFP\_2 feature: -1338588315: [\*]:[c](:[\*])[N+](=O)[O-]
4. Unknown FCFP\_2 feature: 1872392852: [\*][N+](=O)[\*]
5. Unknown FCFP\_2 feature: 260476081: [\*][N+](=[\*])[O-]

## Feature Contribution

### Top features for positive contribution

| Fingerprint | Bit/Smiles | Feature Structure | Score | Irritant in training set |
|-------------|------------|-------------------|-------|--------------------------|
|             |            |                   |       |                          |

|                                        |             |                                                                                                                     |         |                          |
|----------------------------------------|-------------|---------------------------------------------------------------------------------------------------------------------|---------|--------------------------|
| FCFP_12                                | 1747237384  | 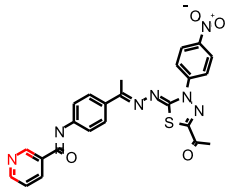<br>[*]:[cH]:n:[cH]:[*]          | 0.208   | 44 out of 44             |
| FCFP_12                                | -124655670  | <br>[*][c](:[*]):[cH]:n:[*]      | 0.2     | 16 out of 16             |
| FCFP_12                                | -1695756380 | <br>[*]1:[cH]:[cH]:[cH]:n:[cH]:1 | 0.194   | 11 out of 11             |
| Top Features for negative contribution |             |                                                                                                                     |         |                          |
| Fingerprint                            | Bit/Smiles  | Feature Structure                                                                                                   | Score   | Irritant in training set |
| FCFP_12                                | 565998553   | <br>[*]C(=[*])C1=N[*]1[*]S1     | -0.0662 | 198 out of 262           |
| FCFP_12                                | 8           | <br>[*][N+](=[*])[*]           | -0.0561 | 3 out of 4               |

|         |   |                                                                                                                                |   |                 |
|---------|---|--------------------------------------------------------------------------------------------------------------------------------|---|-----------------|
| FCFP_12 | 1 | 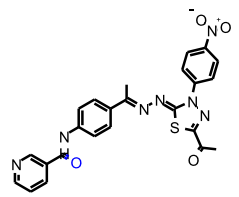 <p data-bbox="1339 305 1402 337">[*]=O</p> | 0 | 872 out of 1051 |
|---------|---|--------------------------------------------------------------------------------------------------------------------------------|---|-----------------|

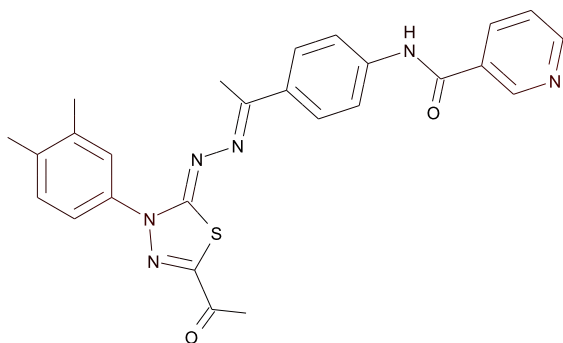

$C_{26}H_{24}N_6O_2S$

Molecular Weight: 484.57275

ALogP: 4.566

Rotatable Bonds: 6

Acceptors: 8

Donors: 1

## Model Prediction

**Prediction: Irritant**

Probability: 1

Enrichment: 1.18

Bayesian Score: 3.54

Mahalanobis Distance: 8.13

Mahalanobis Distance p-value: 0.895

Prediction: Positive if the Bayesian score is above the estimated best cutoff value from minimizing the false positive and false negative rate.

Probability: The estimated probability that the sample is in the positive category. This assumes that the Bayesian score follows a normal distribution and is different from the prediction using a cutoff.

Enrichment: An estimate of enrichment, that is, the increased likelihood (versus random) of this sample being in the category.

Bayesian Score: The standard Laplacian-modified Bayesian score.

Mahalanobis Distance: The Mahalanobis distance (MD) is the distance to the center of the training data. The larger the MD, the less trustworthy the prediction.

Mahalanobis Distance p-value: The p-value gives the fraction of training data with an MD greater than or equal to the one for the given sample, assuming normally distributed data. The smaller the p-value, the less trustworthy the prediction. For highly non-normal X properties (e.g., fingerprints), the MD p-value is wildly inaccurate.

## Structural Similar Compounds

| Name               | COLCHICINE       | ANTHRAQUINONE; 1;1'-IMINODI- | Benzoic acid; p-(N-butyl-2-(butylamino)acetamido)-; butyl ester; |
|--------------------|------------------|------------------------------|------------------------------------------------------------------|
| Structure          |                  |                              |                                                                  |
| Actual Endpoint    | Irritant         | Irritant                     | Irritant                                                         |
| Predicted Endpoint | Irritant         | Irritant                     | Non-Irritant                                                     |
| Distance           | 0.748            | 0.781                        | 0.830                                                            |
| Reference          | AJOPAA 31;837;48 | 28ZPAK-;125;72               | Arzneimittel-Forschung 8;609;58                                  |

## Model Applicability

Unknown features are fingerprint features in the query molecule, but not found or appearing too infrequently in the training set.

1. All properties and OPS components are within expected ranges.

## Feature Contribution

| Top features for positive contribution |            |                                      |       |                          |
|----------------------------------------|------------|--------------------------------------|-------|--------------------------|
| Fingerprint                            | Bit/Smiles | Feature Structure                    | Score | Irritant in training set |
| FCFP_12                                | 1747237384 | <br><chem>[*]:[cH]:n:[cH]:[*]</chem> | 0.208 | 44 out of 44             |

|                                        |             |                                                                                                                                                 |         |                          |
|----------------------------------------|-------------|-------------------------------------------------------------------------------------------------------------------------------------------------|---------|--------------------------|
| FCFP_12                                | -124655670  | 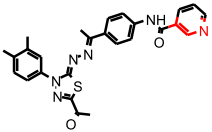<br><chem>[*][c](:[*]):[cH]:n:[*]</chem>                     | 0.2     | 16 out of 16             |
| FCFP_12                                | -1695756380 | <br><chem>[*]1:[cH]:[cH]:[cH]:n:[cH]:1</chem>                | 0.194   | 11 out of 11             |
| Top Features for negative contribution |             |                                                                                                                                                 |         |                          |
| Fingerprint                            | Bit/Smiles  | Feature Structure                                                                                                                               | Score   | Irritant in training set |
| FCFP_12                                | 565998553   | <br><chem>[*]C(=[*])C1=N[*]S1</chem>                         | -0.0662 | 198 out of 262           |
| FCFP_12                                | -1925475824 | <br><chem>[*]:[cH]:[c](:[cH]:[*])C(=O)N[c](:[*]):[*]</chem> | 0       | 4 out of 5               |
| FCFP_12                                | -1143715940 | <br><chem>[*]C1=[*][*]C(=[*])S1</chem>                     | 0       | 454 out of 590           |

# Sorafenib

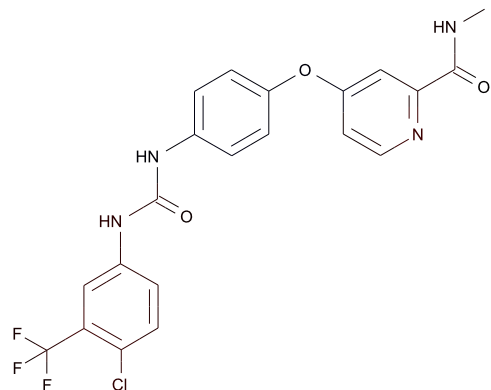

C<sub>21</sub>H<sub>16</sub>ClF<sub>3</sub>N<sub>4</sub>O<sub>3</sub>

Molecular Weight: 464.82494

ALogP: 4.175

Rotatable Bonds: 6

Acceptors: 4

Donors: 3

## Model Prediction

**Prediction: Irritant**

Probability: 1

Enrichment: 1.18

Bayesian Score: 3.04

Mahalanobis Distance: 6.28

Mahalanobis Distance p-value: 1

Prediction: Positive if the Bayesian score is above the estimated best cutoff value from minimizing the false positive and false negative rate.

Probability: The estimated probability that the sample is in the positive category. This assumes that the Bayesian score follows a normal distribution and is different from the prediction using a cutoff.

Enrichment: An estimate of enrichment, that is, the increased likelihood (versus random) of this sample being in the category.

Bayesian Score: The standard Laplacian-modified Bayesian score.

Mahalanobis Distance: The Mahalanobis distance (MD) is the distance to the center of the training data. The larger the MD, the less trustworthy the prediction.

Mahalanobis Distance p-value: The p-value gives the fraction of training data with an MD greater than or equal to the one for the given sample, assuming normally distributed data. The smaller the p-value, the less trustworthy the prediction. For highly non-normal X properties (e.g., fingerprints), the MD p-value is wildly inaccurate.

# TOPKAT\_Ocular\_Irritancy\_None\_vs\_Irritant

## Structural Similar Compounds

| Name               | BENZANILIDE;2';2'''-DITHIOBIS- | 4;4'-DIAMINO-1;1'-DIANTHRIMIDE | 5-NORBORNENE-2;3-DICARBOXYLIC ACID; 1;4;5;6;7;7-HEXACHLORO- |
|--------------------|--------------------------------|--------------------------------|-------------------------------------------------------------|
| Structure          |                                |                                |                                                             |
| Actual Endpoint    | Non-Irritant                   | Irritant                       | Irritant                                                    |
| Predicted Endpoint | Non-Irritant                   | Irritant                       | Irritant                                                    |
| Distance           | 0.743                          | 0.791                          | 0.801                                                       |
| Reference          | 28ZPAK-;173;72                 | 28ZPAK-;125;72                 | 28ZPAK-;92;72                                               |

## Model Applicability

Unknown features are fingerprint features in the query molecule, but not found or appearing too infrequently in the training set.

- All properties and OPS components are within expected ranges.

## Feature Contribution

| Top features for positive contribution |            |                         |       |                          |
|----------------------------------------|------------|-------------------------|-------|--------------------------|
| Fingerprint                            | Bit/Smiles | Feature Structure       | Score | Irritant in training set |
| FCFP_12                                | 1747237384 | <br>[*]:[cH]:n:[cH]:[*] | 0.208 | 44 out of 44             |



|                                        |             |                                                                                                                                                                 |        |                          |
|----------------------------------------|-------------|-----------------------------------------------------------------------------------------------------------------------------------------------------------------|--------|--------------------------|
| FCFP_12                                | -124655670  | 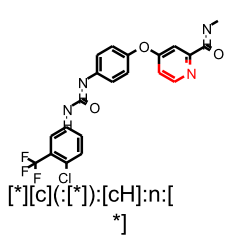<br>[*][c](:[*]):[cH]:n:[*]                                                   | 0.2    | 16 out of 16             |
| FCFP_12                                | -1539132615 | <br>[*]C(=[*])[c](:[cH]:[*]):n:[*]                                           | 0.197  | 13 out of 13             |
| Top Features for negative contribution |             |                                                                                                                                                                 |        |                          |
| Fingerprint                            | Bit/Smiles  | Feature Structure                                                                                                                                               | Score  | Irritant in training set |
| FCFP_12                                | -747629521  | <br>[*]N([c]([cH]:[cH]:[c](O[c](:[*]):[*]):[cH]:1                            | -0.268 | 1 out of 2               |
| FCFP_12                                | 702861189   | <br>[*]N([c]([cH]:[cH]:[c](O[c]2:[cH]:[cH]:[*]:[c]([*]):[cH]:2):[cH]:[cH]:1 | -0.268 | 1 out of 2               |
| FCFP_12                                | -215363676  | <br>[*]([c]([c]([cH]:[cH]:[c](O[c]2:[cH]:[cH]:[*]:[cH]:[cH]:2):[cH]:1      | 0      | 4 out of 5               |

7a

## TOPKAT\_Rat\_Female\_FDA\_None\_vs\_Carcinogen

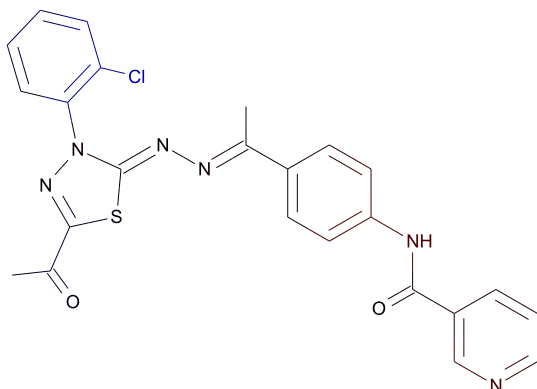C<sub>24</sub>H<sub>19</sub>ClN<sub>6</sub>O<sub>2</sub>S

Molecular Weight: 490.96466

ALogP: 4.258

Rotatable Bonds: 6

Acceptors: 8

Donors: 1

**Model Prediction**

Prediction: Non-Carcinogen

Probability: 0.255

Enrichment: 0.792

Bayesian Score: -2.44

Mahalanobis Distance: 12.7

Mahalanobis Distance p-value: 0.00042

Prediction: Positive if the Bayesian score is above the estimated best cutoff value from minimizing the false positive and false negative rate.

Probability: The estimated probability that the sample is in the positive category. This assumes that the Bayesian score follows a normal distribution and is different from the prediction using a cutoff.

Enrichment: An estimate of enrichment, that is, the increased likelihood (versus random) of this sample being in the category.

Bayesian Score: The standard Laplacian-modified Bayesian score.

Mahalanobis Distance: The Mahalanobis distance (MD) is the distance to the center of the training data. The larger the MD, the less trustworthy the prediction.

Mahalanobis Distance p-value: The p-value gives the fraction of training data with an MD greater than or equal to the one for the given sample, assuming normally distributed data. The smaller the p-value, the less trustworthy the prediction. For highly non-normal X properties (e.g., fingerprints), the MD p-value is wildly inaccurate.

**Structural Similar Compounds**

| Name               | Carbenicillin                                                       | Moricizine                                                          | Doxazosin                                                           |
|--------------------|---------------------------------------------------------------------|---------------------------------------------------------------------|---------------------------------------------------------------------|
| Structure          |                                                                     |                                                                     |                                                                     |
| Actual Endpoint    | Non-Carcinogen                                                      | Carcinogen                                                          | Non-Carcinogen                                                      |
| Predicted Endpoint | Non-Carcinogen                                                      | Carcinogen                                                          | Non-Carcinogen                                                      |
| Distance           | 0.666                                                               | 0.698                                                               | 0.713                                                               |
| Reference          | US FDA (Centre for Drug Eval.& Res./Off. Testing & Res.) Sept. 1997 | US FDA (Centre for Drug Eval.& Res./Off. Testing & Res.) Sept. 1997 | US FDA (Centre for Drug Eval.& Res./Off. Testing & Res.) Sept. 1997 |

**Model Applicability**

Unknown features are fingerprint features in the query molecule, but not found or appearing too infrequently in the training set.

1. All properties and OPS components are within expected ranges.
2. Unknown ECFP\_2 feature: 128986386: [\*]N=C(/C)[c](:[\*]):[\*]
3. Unknown ECFP\_2 feature: 562081661: [\*]C(=NN=[\*])[\*]
4. Unknown ECFP\_2 feature: -819426257: [\*]C(=NN=[\*])[\*]
5. Unknown ECFP\_2 feature: 189949281: [\*]N=C\1/S[\*]=[\*]N1[\*]
6. Unknown ECFP\_2 feature: -1110911409: [\*]=C1[\*][\*]=NN1[c](:[\*]):[\*]
7. Unknown ECFP\_2 feature: -934225701: [\*]C(=[\*])C1=N[\*][\*]S1

**Feature Contribution****Top features for positive contribution**

| Fingerprint | Bit/Smiles | Feature Structure | Score | Carcinogen in training set |
|-------------|------------|-------------------|-------|----------------------------|
|-------------|------------|-------------------|-------|----------------------------|

|                                        |             |                                                                                                                                            |        |                            |
|----------------------------------------|-------------|--------------------------------------------------------------------------------------------------------------------------------------------|--------|----------------------------|
| ECFP_12                                | -177077903  | 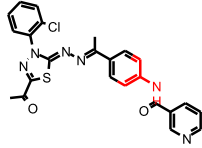<br><chem>[*]N[c](:[cH]:[*]):[cH]:[*]</chem>            | 0.529  | 6 out of 10                |
| ECFP_12                                | -1236483485 | <br><chem>[*]C(=[*])N[c](:[*]):[*]</chem>               | 0.46   | 9 out of 17                |
| ECFP_12                                | 888054369   | <br><chem>[*]N[c]1:[cH]:[*]:[c]([*]):[cH]:[cH]:1</chem> | 0.454  | 5 out of 9                 |
| Top Features for negative contribution |             |                                                                                                                                            |        |                            |
| Fingerprint                            | Bit/Smiles  | Feature Structure                                                                                                                          | Score  | Carcinogen in training set |
| ECFP_12                                | 1335691903  | <br><chem>[*][c](:[*]):[c](Cl):[cH]:[*]</chem>         | -1.11  | 2 out of 26                |
| ECFP_12                                | 1641317964  | <br><chem>[*][c]1:[*]:[cH]:[cH]:[cH]:[c]:1Cl</chem>   | -0.929 | 1 out of 13                |

|         |          |                                                                                                                     |        |             |
|---------|----------|---------------------------------------------------------------------------------------------------------------------|--------|-------------|
| ECFP_12 | 99947387 | 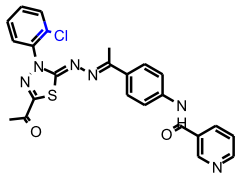<br><chem>[*]:[c](:[*])Cl</chem> | -0.817 | 8 out of 62 |
|---------|----------|---------------------------------------------------------------------------------------------------------------------|--------|-------------|

7b

## TOPKAT\_Rat\_Female\_FDA\_None\_vs\_Carcinogen

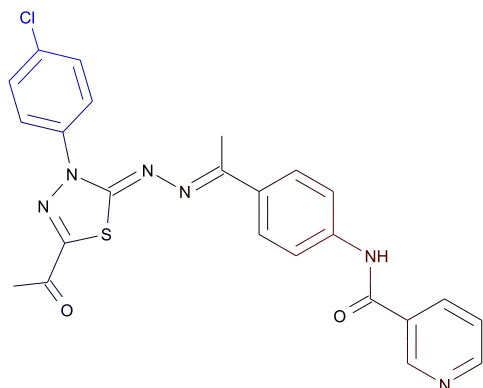C<sub>24</sub>H<sub>19</sub>ClN<sub>6</sub>O<sub>2</sub>S

Molecular Weight: 490.96465

ALogP: 4.258

Rotatable Bonds: 6

Acceptors: 8

Donors: 1

**Model Prediction**

Prediction: Non-Carcinogen

Probability: 0.241

Enrichment: 0.749

Bayesian Score: -3.4

Mahalanobis Distance: 13.5

Mahalanobis Distance p-value: 2.05e-005

Prediction: Positive if the Bayesian score is above the estimated best cutoff value from minimizing the false positive and false negative rate.

Probability: The estimated probability that the sample is in the positive category. This assumes that the Bayesian score follows a normal distribution and is different from the prediction using a cutoff.

Enrichment: An estimate of enrichment, that is, the increased likelihood (versus random) of this sample being in the category.

Bayesian Score: The standard Laplacian-modified Bayesian score.

Mahalanobis Distance: The Mahalanobis distance (MD) is the distance to the center of the training data. The larger the MD, the less trustworthy the prediction.

Mahalanobis Distance p-value: The p-value gives the fraction of training data with an MD greater than or equal to the one for the given sample, assuming normally distributed data. The smaller the p-value, the less trustworthy the prediction. For highly non-normal X properties (e.g., fingerprints), the MD p-value is wildly inaccurate.

**Structural Similar Compounds**

| Name               | Carbenicillin                                                       | Moricizine                                                          | Doxazosin                                                           |
|--------------------|---------------------------------------------------------------------|---------------------------------------------------------------------|---------------------------------------------------------------------|
| Structure          |                                                                     |                                                                     |                                                                     |
| Actual Endpoint    | Non-Carcinogen                                                      | Carcinogen                                                          | Non-Carcinogen                                                      |
| Predicted Endpoint | Non-Carcinogen                                                      | Carcinogen                                                          | Non-Carcinogen                                                      |
| Distance           | 0.668                                                               | 0.708                                                               | 0.715                                                               |
| Reference          | US FDA (Centre for Drug Eval.& Res./Off. Testing & Res.) Sept. 1997 | US FDA (Centre for Drug Eval.& Res./Off. Testing & Res.) Sept. 1997 | US FDA (Centre for Drug Eval.& Res./Off. Testing & Res.) Sept. 1997 |

**Model Applicability**

Unknown features are fingerprint features in the query molecule, but not found or appearing too infrequently in the training set.

1. All properties and OPS components are within expected ranges.
2. Unknown ECFP\_2 feature: 128986386: [\*]N=C(/C)[c](:[\*]):[\*]
3. Unknown ECFP\_2 feature: 562081661: [\*]C(=NN=[\*])[\*]
4. Unknown ECFP\_2 feature: -819426257: [\*]C(=NN=[\*])[\*]
5. Unknown ECFP\_2 feature: 189949281: [\*]N=C\1/S[\*]=[\*]N1[\*]
6. Unknown ECFP\_2 feature: -1110911409: [\*]=C1[\*][\*]=NN1[c](:[\*]):[\*]
7. Unknown ECFP\_2 feature: -934225701: [\*]C(=[\*])C1=N[\*][\*]S1

**Feature Contribution****Top features for positive contribution**

| Fingerprint | Bit/Smiles | Feature Structure | Score | Carcinogen in training set |
|-------------|------------|-------------------|-------|----------------------------|
|-------------|------------|-------------------|-------|----------------------------|

|                                        |             |                                                                                                                               |        |                            |
|----------------------------------------|-------------|-------------------------------------------------------------------------------------------------------------------------------|--------|----------------------------|
| ECFP_12                                | -177077903  | 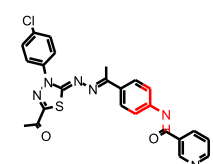<br>[*]N[c](:[cH]:[*]):[cH]:[*]            | 0.529  | 6 out of 10                |
| ECFP_12                                | -1236483485 | <br>[*]C(=[*])N[c](:[*]):[*]               | 0.46   | 9 out of 17                |
| ECFP_12                                | 888054369   | <br>[*]N[c]1:[cH]:[*]:[c]([*]):[cH]:[cH]:1 | 0.454  | 5 out of 9                 |
| Top Features for negative contribution |             |                                                                                                                               |        |                            |
| Fingerprint                            | Bit/Smiles  | Feature Structure                                                                                                             | Score  | Carcinogen in training set |
| ECFP_12                                | 99947387    | <br>[*]:[c](:[*])Cl                       | -0.817 | 8 out of 62                |
| ECFP_12                                | 1854732111  | <br>[*][c]1:[*]:[cH]:[c](Cl):[cH]:[cH]:1 | -0.816 | 4 out of 33                |

|         |           |                                                                                                                                                                                                                                |        |            |
|---------|-----------|--------------------------------------------------------------------------------------------------------------------------------------------------------------------------------------------------------------------------------|--------|------------|
| ECFP_12 | 129482634 | 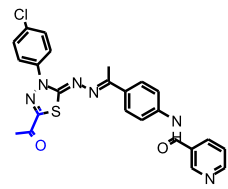 <p>Chemical structure showing a complex molecule with a chlorophenyl group, a hydrazine linker, a carbonyl group, and a pyridine ring.</p> | -0.811 | 0 out of 4 |
|---------|-----------|--------------------------------------------------------------------------------------------------------------------------------------------------------------------------------------------------------------------------------|--------|------------|

[\*]C(=[\*])C(=O)C

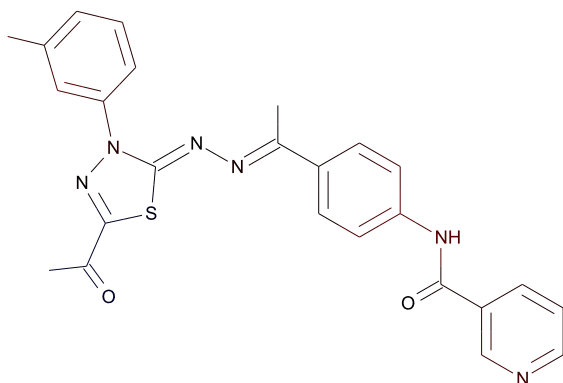

$C_{25}H_{22}N_6O_2S$

Molecular Weight: 470.54617

ALogP: 4.08

Rotatable Bonds: 6

Acceptors: 8

Donors: 1

## Model Prediction

Prediction: Carcinogen

Probability: 0.354

Enrichment: 1.1

Bayesian Score: 2.44

Mahalanobis Distance: 13.3

Mahalanobis Distance p-value: 3.69e-005

Prediction: Positive if the Bayesian score is above the estimated best cutoff value from minimizing the false positive and false negative rate.

Probability: The estimated probability that the sample is in the positive category. This assumes that the Bayesian score follows a normal distribution and is different from the prediction using a cutoff.

Enrichment: An estimate of enrichment, that is, the increased likelihood (versus random) of this sample being in the category. Bayesian Score: The standard Laplacian-modified Bayesian score.

Mahalanobis Distance: The Mahalanobis distance (MD) is the distance to the center of the training data. The larger the MD, the less trustworthy the prediction.

Mahalanobis Distance p-value: The p-value gives the fraction of training data with an MD greater than or equal to the one for the given sample, assuming normally distributed data. The smaller the p-value, the less trustworthy the prediction. For highly non-normal X properties (e.g., fingerprints), the MD p-value is wildly inaccurate.

## Structural Similar Compounds

| Name               | Carbenicillin                                                       | Moricizine                                                          | Nisoldipine                                                         |
|--------------------|---------------------------------------------------------------------|---------------------------------------------------------------------|---------------------------------------------------------------------|
| Structure          |                                                                     |                                                                     |                                                                     |
| Actual Endpoint    | Non-Carcinogen                                                      | Carcinogen                                                          | Non-Carcinogen                                                      |
| Predicted Endpoint | Non-Carcinogen                                                      | Carcinogen                                                          | Non-Carcinogen                                                      |
| Distance           | 0.666                                                               | 0.683                                                               | 0.691                                                               |
| Reference          | US FDA (Centre for Drug Eval.& Res./Off. Testing & Res.) Sept. 1997 | US FDA (Centre for Drug Eval.& Res./Off. Testing & Res.) Sept. 1997 | US FDA (Centre for Drug Eval.& Res./Off. Testing & Res.) Sept. 1997 |

## Model Applicability

Unknown features are fingerprint features in the query molecule, but not found or appearing too infrequently in the training set.

1. All properties and OPS components are within expected ranges.
2. Unknown ECFP\_2 feature: 128986386: [\*]N=C(/C)[c](:[\*]):[\*]
3. Unknown ECFP\_2 feature: 562081661: [\*]C(=NN=[\*])[\*]
4. Unknown ECFP\_2 feature: -819426257: [\*]C(=NN=[\*])[\*]
5. Unknown ECFP\_2 feature: 189949281: [\*]N=C\1/S[\*]=[\*]N1[\*]
6. Unknown ECFP\_2 feature: -1110911409: [\*]=C1[\*][\*]=NN1[c](:[\*]):[\*]
7. Unknown ECFP\_2 feature: -934225701: [\*]C(=[\*])C1=N[\*][\*]S1

## Feature Contribution

### Top features for positive contribution

| Fingerprint | Bit/Smiles | Feature Structure | Score | Carcinogen in training set |
|-------------|------------|-------------------|-------|----------------------------|
|-------------|------------|-------------------|-------|----------------------------|



| ECFP_12                                | -177077903  | 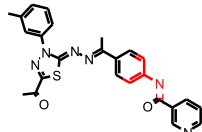<br><chem>[*]N[c](:[cH]:[*]):[cH]:[*]</chem>             | 0.529  | 6 out of 10                |
|----------------------------------------|-------------|---------------------------------------------------------------------------------------------------------------------------------------------|--------|----------------------------|
| ECFP_12                                | -1236483485 | <br><chem>[*]C(=[*])N[c](:[*]):[*]</chem>                | 0.46   | 9 out of 17                |
| ECFP_12                                | 888054369   | <br><chem>[*]N[c]1:[cH]:[*]:[c]([*]):[cH]:[cH]:1</chem>  | 0.454  | 5 out of 9                 |
| Top Features for negative contribution |             |                                                                                                                                             |        |                            |
| Fingerprint                            | Bit/Smiles  | Feature Structure                                                                                                                           | Score  | Carcinogen in training set |
| ECFP_12                                | 129482634   | <br><chem>[*]C(=[*])C(=O)C</chem>                       | -0.811 | 0 out of 4                 |
| ECFP_12                                | 2007300961  | <br><chem>[*][c]1:[*]:[c]([*]):[cH]:[cH]:[cH]:1</chem> | -0.426 | 7 out of 36                |

|         |           |                                                                                                |        |             |
|---------|-----------|------------------------------------------------------------------------------------------------|--------|-------------|
| ECFP_12 | 912478223 | 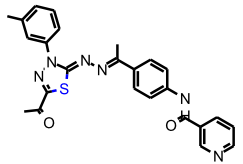<br>[*]S[*] | -0.318 | 2 out of 10 |
|---------|-----------|------------------------------------------------------------------------------------------------|--------|-------------|

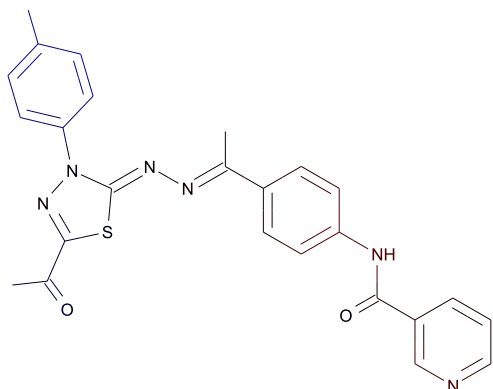

$C_{25}H_{22}N_6O_2S$

Molecular Weight: 470.54617

ALogP: 4.08

Rotatable Bonds: 6

Acceptors: 8

Donors: 1

## Model Prediction

Prediction: Non-Carcinogen

Probability: 0.263

Enrichment: 0.818

Bayesian Score: -1.93

Mahalanobis Distance: 13.1

Mahalanobis Distance p-value: 8.3e-005

Prediction: Positive if the Bayesian score is above the estimated best cutoff value from minimizing the false positive and false negative rate.

Probability: The estimated probability that the sample is in the positive category. This assumes that the Bayesian score follows a normal distribution and is different from the prediction using a cutoff.

Enrichment: An estimate of enrichment, that is, the increased likelihood (versus random) of this sample being in the category.

Bayesian Score: The standard Laplacian-modified Bayesian score.

Mahalanobis Distance: The Mahalanobis distance (MD) is the distance to the center of the training data. The larger the MD, the less trustworthy the prediction.

Mahalanobis Distance p-value: The p-value gives the fraction of training data with an MD greater than or equal to the one for the given sample, assuming normally distributed data. The smaller the p-value, the less trustworthy the prediction. For highly non-normal X properties (e.g., fingerprints), the MD p-value is wildly inaccurate.

## Structural Similar Compounds

| Name               | Carbenicillin                                                       | Moricizine                                                          | Nisoldipine                                                         |
|--------------------|---------------------------------------------------------------------|---------------------------------------------------------------------|---------------------------------------------------------------------|
| Structure          |                                                                     |                                                                     |                                                                     |
| Actual Endpoint    | Non-Carcinogen                                                      | Carcinogen                                                          | Non-Carcinogen                                                      |
| Predicted Endpoint | Non-Carcinogen                                                      | Carcinogen                                                          | Non-Carcinogen                                                      |
| Distance           | 0.668                                                               | 0.686                                                               | 0.691                                                               |
| Reference          | US FDA (Centre for Drug Eval.& Res./Off. Testing & Res.) Sept. 1997 | US FDA (Centre for Drug Eval.& Res./Off. Testing & Res.) Sept. 1997 | US FDA (Centre for Drug Eval.& Res./Off. Testing & Res.) Sept. 1997 |

## Model Applicability

Unknown features are fingerprint features in the query molecule, but not found or appearing too infrequently in the training set.

1. All properties and OPS components are within expected ranges.
2. Unknown ECFP\_2 feature: 128986386: [\*]N=C(/C)[c](:[\*]):[\*]
3. Unknown ECFP\_2 feature: 562081661: [\*]C(=NN=[\*])[\*]
4. Unknown ECFP\_2 feature: -819426257: [\*]C(=NN=[\*])[\*]
5. Unknown ECFP\_2 feature: 189949281: [\*]N=C\1/S[\*]=[\*]N1[\*]
6. Unknown ECFP\_2 feature: -1110911409: [\*]=C1[\*][\*]=NN1[c](:[\*]):[\*]
7. Unknown ECFP\_2 feature: -934225701: [\*]C(=[\*])C1=N[\*][\*]S1

## Feature Contribution

### Top features for positive contribution

| Fingerprint | Bit/Smiles | Feature Structure | Score | Carcinogen in training set |
|-------------|------------|-------------------|-------|----------------------------|
|-------------|------------|-------------------|-------|----------------------------|

|                                        |             |                                                                                                                                            |       |                            |
|----------------------------------------|-------------|--------------------------------------------------------------------------------------------------------------------------------------------|-------|----------------------------|
| ECFP_12                                | -177077903  | 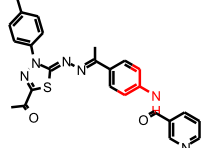<br><chem>[*]N[c](:[cH]:[*]):[cH]:[*]</chem>            | 0.529 | 6 out of 10                |
| ECFP_12                                | -1236483485 | <br><chem>[*]C(=[*])N[c](:[*]):[*]</chem>               | 0.46  | 9 out of 17                |
| ECFP_12                                | 888054369   | <br><chem>[*]N[c]1:[cH]:[*]:[c]([*]):[cH]:[cH]:1</chem> | 0.454 | 5 out of 9                 |
| Top Features for negative contribution |             |                                                                                                                                            |       |                            |
| Fingerprint                            | Bit/Smiles  | Feature Structure                                                                                                                          | Score | Carcinogen in training set |
| ECFP_12                                | -533780882  | <br><chem>C[c]1:[cH]:[cH]:[*]:[cH]:[cH]:1</chem>       | -1.06 | 0 out of 6                 |
| ECFP_12                                | -1926229349 | <br><chem>[*][c]1:[cH]:[cH]:[c](C):[cH]:[cH]:1</chem> | -1.06 | 0 out of 6                 |

|         |           |                                                                                                             |        |            |
|---------|-----------|-------------------------------------------------------------------------------------------------------------|--------|------------|
| ECFP_12 | 129482634 | 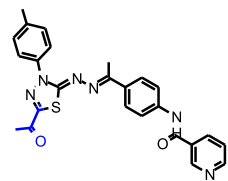 <p>[*]C(=[*])C(=O)C</p> | -0.811 | 0 out of 4 |
|---------|-----------|-------------------------------------------------------------------------------------------------------------|--------|------------|

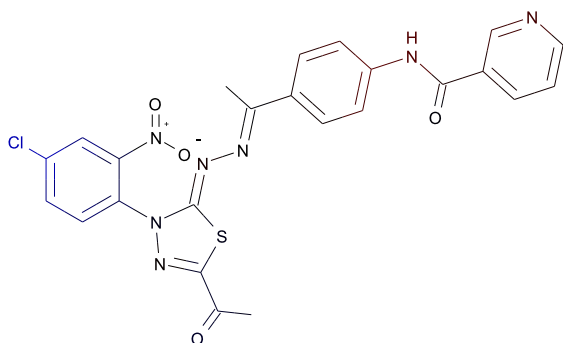

$C_{24}H_{18}ClN_7O_4S$

Molecular Weight: 535.96222

ALogP: 4.153

Rotatable Bonds: 7

Acceptors: 10

Donors: 1

## Model Prediction

Prediction: Non-Carcinogen

Probability: 0.233

Enrichment: 0.725

Bayesian Score: -3.98

Mahalanobis Distance: 14.1

Mahalanobis Distance p-value: 1.16e-006

Prediction: Positive if the Bayesian score is above the estimated best cutoff value from minimizing the false positive and false negative rate.

Probability: The estimated probability that the sample is in the positive category. This assumes that the Bayesian score follows a normal distribution and is different from the prediction using a cutoff.

Enrichment: An estimate of enrichment, that is, the increased likelihood (versus random) of this sample being in the category. Bayesian Score: The standard Laplacian-modified Bayesian score.

Mahalanobis Distance: The Mahalanobis distance (MD) is the distance to the center of the training data. The larger the MD, the less trustworthy the prediction.

Mahalanobis Distance p-value: The p-value gives the fraction of training data with an MD greater than or equal to the one for the given sample, assuming normally distributed data. The smaller the p-value, the less trustworthy the prediction. For highly non-normal X properties (e.g., fingerprints), the MD p-value is wildly inaccurate.

## Structural Similar Compounds

| Name               | Nicardipine                                                         | Carbenicillin                                                       | Doxazosin                                                           |
|--------------------|---------------------------------------------------------------------|---------------------------------------------------------------------|---------------------------------------------------------------------|
| Structure          |                                                                     |                                                                     |                                                                     |
| Actual Endpoint    | Carcinogen                                                          | Non-Carcinogen                                                      | Non-Carcinogen                                                      |
| Predicted Endpoint | Carcinogen                                                          | Non-Carcinogen                                                      | Non-Carcinogen                                                      |
| Distance           | 0.784                                                               | 0.793                                                               | 0.794                                                               |
| Reference          | US FDA (Centre for Drug Eval.& Res./Off. Testing & Res.) Sept. 1997 | US FDA (Centre for Drug Eval.& Res./Off. Testing & Res.) Sept. 1997 | US FDA (Centre for Drug Eval.& Res./Off. Testing & Res.) Sept. 1997 |

## Model Applicability

Unknown features are fingerprint features in the query molecule, but not found or appearing too infrequently in the training set.

1. All properties and OPS components are within expected ranges.
2. Unknown ECFP\_2 feature: 1043790491: [\*][N+](=[\*])[\*]
3. Unknown ECFP\_2 feature: 781519895: [\*][O-]
4. Unknown ECFP\_2 feature: -934225701: [\*]C(=[\*])C1=N[\*][\*]S1
5. Unknown ECFP\_2 feature: -1110911409: [\*]=C1[\*][\*]=NN1[c](:[\*]):[\*]
6. Unknown ECFP\_2 feature: 189949281: [\*]N=C\1/S[\*]=[\*]N1[\*]
7. Unknown ECFP\_2 feature: -1956535100: [\*][c](:[\*]):[c](:[cH]:[\*])[N+](=[\*])[\*]
8. Unknown ECFP\_2 feature: -819426257: [\*]C(=NN=[\*])[\*]
9. Unknown ECFP\_2 feature: 562081661: [\*]C(=NN=[\*])[\*]
10. Unknown ECFP\_2 feature: 128986386: [\*]N=C(/C)\[c](:[\*]):[\*]
11. Unknown ECFP\_2 feature: -215026467: [\*]:[c](:[\*])[N+](=O)[O-]
12. Unknown ECFP\_2 feature: 2104376220: [\*][N+](=O)[\*]
13. Unknown ECFP\_2 feature: -659271057: [\*][N+](=[\*])[O-]

## Feature Contribution

### Top features for positive contribution

| Fingerprint | Bit/Smiles | Feature Structure | Score | Carcinogen in training set |
|-------------|------------|-------------------|-------|----------------------------|
|             |            |                   |       |                            |

| ECFP_12                                | -177077903  | 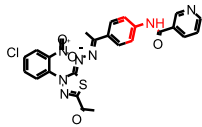<br><chem>[*]N[c](:[cH]:[*]):[cH]:[*]</chem>            | 0.529  | 6 out of 10                |
|----------------------------------------|-------------|--------------------------------------------------------------------------------------------------------------------------------------------|--------|----------------------------|
| ECFP_12                                | -1236483485 | <br><chem>[*]C(=[*])N[c](:[*]):[*]</chem>               | 0.46   | 9 out of 17                |
| ECFP_12                                | 888054369   | <br><chem>[*]N[c]1:[cH]:[*]:[c]([*]):[cH]:[cH]:1</chem> | 0.454  | 5 out of 9                 |
| Top Features for negative contribution |             |                                                                                                                                            |        |                            |
| Fingerprint                            | Bit/Smiles  | Feature Structure                                                                                                                          | Score  | Carcinogen in training set |
| ECFP_12                                | 99947387    | <br><chem>[*]:[c](:[*])Cl</chem>                      | -0.817 | 8 out of 62                |
| ECFP_12                                | 1854732111  | <br><chem>[*][c]1:[*]:[cH]:[c](Cl):[cH]:[cH]:1</chem> | -0.816 | 4 out of 33                |

|         |           |                                                                                                                      |        |            |
|---------|-----------|----------------------------------------------------------------------------------------------------------------------|--------|------------|
| ECFP_12 | 129482634 | 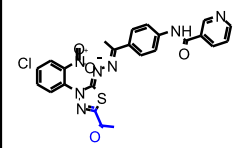<br><chem>[*]C(=[*])C(=O)C</chem> | -0.811 | 0 out of 4 |
|---------|-----------|----------------------------------------------------------------------------------------------------------------------|--------|------------|



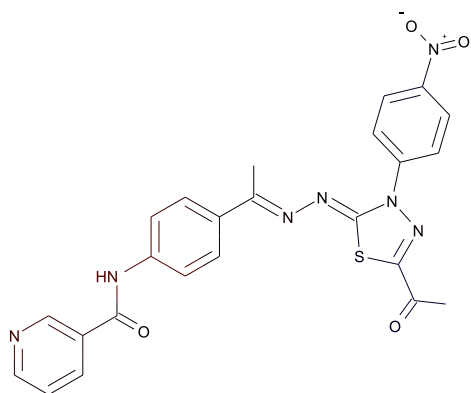

$C_{24}H_{19}N_7O_4S$

Molecular Weight: 501.51715

ALogP: 3.488

Rotatable Bonds: 7

Acceptors: 10

Donors: 1

## Model Prediction

Prediction: Carcinogen

Probability: 0.292

Enrichment: 0.906

Bayesian Score: -0.345

Mahalanobis Distance: 13.6

Mahalanobis Distance p-value: 1.21e-005

Prediction: Positive if the Bayesian score is above the estimated best cutoff value from minimizing the false positive and false negative rate.

Probability: The estimated probability that the sample is in the positive category. This assumes that the Bayesian score follows a normal distribution and is different from the prediction using a cutoff.

Enrichment: An estimate of enrichment, that is, the increased likelihood (versus random) of this sample being in the category.

Bayesian Score: The standard Laplacian-modified Bayesian score.

Mahalanobis Distance: The Mahalanobis distance (MD) is the distance to the center of the training data. The larger the MD, the less trustworthy the prediction.

Mahalanobis Distance p-value: The p-value gives the fraction of training data with an MD greater than or equal to the one for the given sample, assuming normally distributed data. The smaller the p-value, the less trustworthy the prediction. For highly non-normal X properties (e.g., fingerprints), the MD p-value is wildly inaccurate.

## Structural Similar Compounds

| Name               | Doxazosin                                                           | Nimodipine                                                          | Nicardipine                                                         |
|--------------------|---------------------------------------------------------------------|---------------------------------------------------------------------|---------------------------------------------------------------------|
| Structure          |                                                                     |                                                                     |                                                                     |
| Actual Endpoint    | Non-Carcinogen                                                      | Non-Carcinogen                                                      | Carcinogen                                                          |
| Predicted Endpoint | Non-Carcinogen                                                      | Non-Carcinogen                                                      | Carcinogen                                                          |
| Distance           | 0.751                                                               | 0.762                                                               | 0.784                                                               |
| Reference          | US FDA (Centre for Drug Eval.& Res./Off. Testing & Res.) Sept. 1997 | US FDA (Centre for Drug Eval.& Res./Off. Testing & Res.) Sept. 1997 | US FDA (Centre for Drug Eval.& Res./Off. Testing & Res.) Sept. 1997 |

## Model Applicability

Unknown features are fingerprint features in the query molecule, but not found or appearing too infrequently in the training set.

1. All properties and OPS components are within expected ranges.
2. Unknown ECFP\_2 feature: 1043790491: [\*][N+](=[\*])[\*]
3. Unknown ECFP\_2 feature: 781519895: [\*][O-]
4. Unknown ECFP\_2 feature: 128986386: [\*]N=C(/C)[c](:[\*]):[\*]
5. Unknown ECFP\_2 feature: 562081661: [\*]C(=NN=[\*])[\*]
6. Unknown ECFP\_2 feature: -819426257: [\*]C(=NN=[\*])[\*]
7. Unknown ECFP\_2 feature: -179073144: [\*][N+](=[\*])[c](:[cH]:[\*]):[cH]:[\*]
8. Unknown ECFP\_2 feature: 189949281: [\*]N=C\1/S[\*]=[\*]N1[\*]
9. Unknown ECFP\_2 feature: -1110911409: [\*]=C1[\*][\*]=NN1[c](:[\*]):[\*]
10. Unknown ECFP\_2 feature: -934225701: [\*]C(=[\*])C1=N[\*][\*]S1
11. Unknown ECFP\_2 feature: -215026467: [\*]:[c](:[\*])[N+](=O)[O-]
12. Unknown ECFP\_2 feature: 2104376220: [\*][N+](=O)[\*]
13. Unknown ECFP\_2 feature: -659271057: [\*][N+](=[\*])[O-]

## Feature Contribution

### Top features for positive contribution

| Fingerprint | Bit/Smiles | Feature Structure | Score | Carcinogen in training set |
|-------------|------------|-------------------|-------|----------------------------|
|             |            |                   |       |                            |

|                                        |             |                                                                                                                                     |        |                            |
|----------------------------------------|-------------|-------------------------------------------------------------------------------------------------------------------------------------|--------|----------------------------|
| ECFP_12                                | -177077903  | 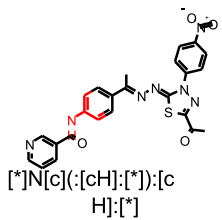<br>[*]N[c](:[cH]:[*]):[cH]:[*]                  | 0.529  | 6 out of 10                |
| ECFP_12                                | -1236483485 | <br>[*]C(=[*])N[c](:[*]):[*]                     | 0.46   | 9 out of 17                |
| ECFP_12                                | 888054369   | <br>[*]N[c]1:[cH]:[*]:[c]([*]):[cH]:[cH]:1       | 0.454  | 5 out of 9                 |
| Top Features for negative contribution |             |                                                                                                                                     |        |                            |
| Fingerprint                            | Bit/Smiles  | Feature Structure                                                                                                                   | Score  | Carcinogen in training set |
| ECFP_12                                | 129482634   | <br>[*]C(=[*])C(=O)C                            | -0.811 | 0 out of 4                 |
| ECFP_12                                | -2137232509 | <br>[*]N(c1)[c]1:[cH]:[*]:[c]([*]):[cH]:[cH]:1 | -0.485 | 0 out of 2                 |

|         |           |                                                                                                   |        |             |
|---------|-----------|---------------------------------------------------------------------------------------------------|--------|-------------|
| ECFP_12 | 912478223 | 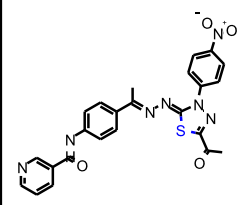 <p>[*]S[*]</p> | -0.318 | 2 out of 10 |
|---------|-----------|---------------------------------------------------------------------------------------------------|--------|-------------|

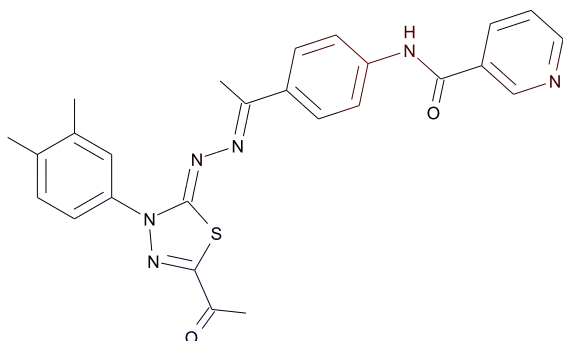

$C_{26}H_{24}N_6O_2S$

Molecular Weight: 484.57275

ALogP: 4.566

Rotatable Bonds: 6

Acceptors: 8

Donors: 1

## Model Prediction

Prediction: Carcinogen

Probability: 0.325

Enrichment: 1.01

Bayesian Score: 1.23

Mahalanobis Distance: 13.3

Mahalanobis Distance p-value: 3.8e-005

Prediction: Positive if the Bayesian score is above the estimated best cutoff value from minimizing the false positive and false negative rate.

Probability: The estimated probability that the sample is in the positive category. This assumes that the Bayesian score follows a normal distribution and is different from the prediction using a cutoff.

Enrichment: An estimate of enrichment, that is, the increased likelihood (versus random) of this sample being in the category. Bayesian Score: The standard Laplacian-modified Bayesian score.

Mahalanobis Distance: The Mahalanobis distance (MD) is the distance to the center of the training data. The larger the MD, the less trustworthy the prediction.

Mahalanobis Distance p-value: The p-value gives the fraction of training data with an MD greater than or equal to the one for the given sample, assuming normally distributed data. The smaller the p-value, the less trustworthy the prediction. For highly non-normal X properties (e.g., fingerprints), the MD p-value is wildly inaccurate.

## Structural Similar Compounds

| Name               | Carbenicillin                                                       | Moricizine                                                          | Nicardipine                                                         |
|--------------------|---------------------------------------------------------------------|---------------------------------------------------------------------|---------------------------------------------------------------------|
| Structure          |                                                                     |                                                                     |                                                                     |
| Actual Endpoint    | Non-Carcinogen                                                      | Carcinogen                                                          | Carcinogen                                                          |
| Predicted Endpoint | Non-Carcinogen                                                      | Carcinogen                                                          | Carcinogen                                                          |
| Distance           | 0.682                                                               | 0.714                                                               | 0.728                                                               |
| Reference          | US FDA (Centre for Drug Eval.& Res./Off. Testing & Res.) Sept. 1997 | US FDA (Centre for Drug Eval.& Res./Off. Testing & Res.) Sept. 1997 | US FDA (Centre for Drug Eval.& Res./Off. Testing & Res.) Sept. 1997 |

## Model Applicability

Unknown features are fingerprint features in the query molecule, but not found or appearing too infrequently in the training set.

1. All properties and OPS components are within expected ranges.
2. Unknown ECFP\_2 feature: -934225701: [\*]C(=[\*])C1=N[\*][\*]S1
3. Unknown ECFP\_2 feature: -1110911409: [\*]=C1[\*][\*]=NN1[c](:[\*]):[\*]
4. Unknown ECFP\_2 feature: 189949281: [\*]N=C\1/S[\*]=[\*]N1[\*]
5. Unknown ECFP\_2 feature: -819426257: [\*]C(=NN=[\*])[\*]
6. Unknown ECFP\_2 feature: 562081661: [\*]C(=NN=[\*])[\*]
7. Unknown ECFP\_2 feature: 128986386: [\*]N=C(/C)[c](:[\*]):[\*]

## Feature Contribution

### Top features for positive contribution

| Fingerprint | Bit/Smiles | Feature Structure | Score | Carcinogen in training set |
|-------------|------------|-------------------|-------|----------------------------|
|-------------|------------|-------------------|-------|----------------------------|

|                                        |             |                                                                                                                                                   |        |                            |
|----------------------------------------|-------------|---------------------------------------------------------------------------------------------------------------------------------------------------|--------|----------------------------|
| ECFP_12                                | -177077903  | 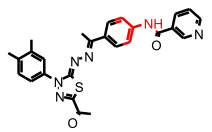<br><chem>[*]N[c](:[cH]:[*]):[cH]:[*]</chem>                   | 0.529  | 6 out of 10                |
| ECFP_12                                | -1236483485 | <br><chem>[*]C(=[*])N[c](:[*]):[*]</chem>                      | 0.46   | 9 out of 17                |
| ECFP_12                                | 888054369   | <br><chem>[*]N[c]1:[cH]:[*]:[c]([*]):[cH]:[cH]:1</chem>        | 0.454  | 5 out of 9                 |
| Top Features for negative contribution |             |                                                                                                                                                   |        |                            |
| Fingerprint                            | Bit/Smiles  | Feature Structure                                                                                                                                 | Score  | Carcinogen in training set |
| ECFP_12                                | 129482634   | <br><chem>[*]C(=[*])C(=O)C</chem>                             | -0.811 | 0 out of 4                 |
| ECFP_12                                | -2137232509 | <br><chem>[*]N([*])[c]1:[cH]:[*]:[c]([*]):[cH]:[cH]:1</chem> | -0.485 | 0 out of 2                 |

|         |           |                                                                                                |        |             |
|---------|-----------|------------------------------------------------------------------------------------------------|--------|-------------|
| ECFP_12 | 912478223 | 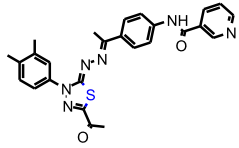<br>[*]S[*] | -0.318 | 2 out of 10 |
|---------|-----------|------------------------------------------------------------------------------------------------|--------|-------------|

# Sorafenib

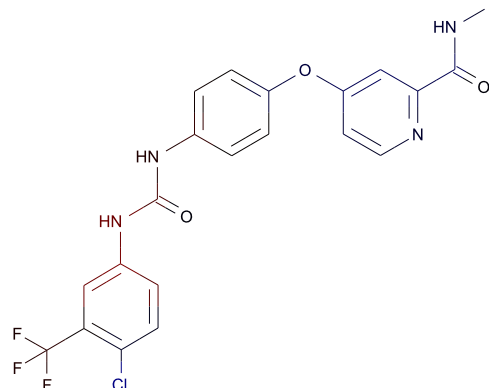

C<sub>21</sub>H<sub>16</sub>ClF<sub>3</sub>N<sub>4</sub>O<sub>3</sub>

Molecular Weight: 464.82494

ALogP: 4.175

Rotatable Bonds: 6

Acceptors: 4

Donors: 3

## Model Prediction

Prediction: Non-Carcinogen

Probability: 0.236

Enrichment: 0.734

Bayesian Score: -3.76

Mahalanobis Distance: 12.2

Mahalanobis Distance p-value: 0.00229

Prediction: Positive if the Bayesian score is above the estimated best cutoff value from minimizing the false positive and false negative rate.

Probability: The estimated probability that the sample is in the positive category. This assumes that the Bayesian score follows a normal distribution and is different from the prediction using a cutoff.

Enrichment: An estimate of enrichment, that is, the increased likelihood (versus random) of this sample being in the category.

Bayesian Score: The standard Laplacian-modified Bayesian score.

Mahalanobis Distance: The Mahalanobis distance (MD) is the distance to the center of the training data. The larger the MD, the less trustworthy the prediction.

Mahalanobis Distance p-value: The p-value gives the fraction of training data with an MD greater than or equal to the one for the given sample, assuming normally distributed data. The smaller the p-value, the less trustworthy the prediction. For highly non-normal X properties (e.g., fingerprints), the MD p-value is wildly inaccurate.

# TOPKAT\_Rat\_Female\_FDA\_None\_vs\_Carcinogen

## Structural Similar Compounds

| Name               | Glimepride                                                          | Glyburide                                                           | Fluvastatin                                                         |
|--------------------|---------------------------------------------------------------------|---------------------------------------------------------------------|---------------------------------------------------------------------|
| Structure          |                                                                     |                                                                     |                                                                     |
| Actual Endpoint    | Non-Carcinogen                                                      | Non-Carcinogen                                                      | Non-Carcinogen                                                      |
| Predicted Endpoint | Non-Carcinogen                                                      | Non-Carcinogen                                                      | Non-Carcinogen                                                      |
| Distance           | 0.620                                                               | 0.635                                                               | 0.635                                                               |
| Reference          | US FDA (Centre for Drug Eval.& Res./Off. Testing & Res.) Sept. 1997 | US FDA (Centre for Drug Eval.& Res./Off. Testing & Res.) Sept. 1997 | US FDA (Centre for Drug Eval.& Res./Off. Testing & Res.) Sept. 1997 |

## Model Applicability

Unknown features are fingerprint features in the query molecule, but not found or appearing too infrequently in the training set.

1. All properties and OPS components are within expected ranges.

## Feature Contribution

### Top features for positive contribution

| Fingerprint | Bit/Smiles | Feature Structure                                              | Score | Carcinogen in training set |
|-------------|------------|----------------------------------------------------------------|-------|----------------------------|
| ECFP_12     | -970385855 | <br>[*]N[c]:[cH]:[*]:[c]<br>([*]):[c]:[cH]:1C(<br>[*])([*])[*] | 0.613 | 2 out of 2                 |

| ECFP_12                                | -177077903  | 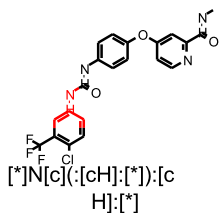<br><chem>[*]N[c](:[cH]:[*]):[cH]:[*]</chem>      | 0.529  | 6 out of 10                |
|----------------------------------------|-------------|--------------------------------------------------------------------------------------------------------------------------------------|--------|----------------------------|
| ECFP_12                                | -1236483485 | <br><chem>[*]C(=[*])N[c](:[*]):[*]</chem>         | 0.46   | 9 out of 17                |
| Top Features for negative contribution |             |                                                                                                                                      |        |                            |
| Fingerprint                            | Bit/Smiles  | Feature Structure                                                                                                                    | Score  | Carcinogen in training set |
| ECFP_12                                | 1335691903  | <br><chem>[*][c](:[*]):[c](Cl):[cH]:[*]</chem>    | -1.11  | 2 out of 26                |
| ECFP_12                                | 99947387    | <br><chem>[*]:[c](:[*])Cl</chem>                 | -0.817 | 8 out of 62                |
| ECFP_12                                | 1413420509  | <br><chem>[*]C(=[*])[c](:[cH]:[*]):n:[*]</chem> | -0.661 | 0 out of 3                 |



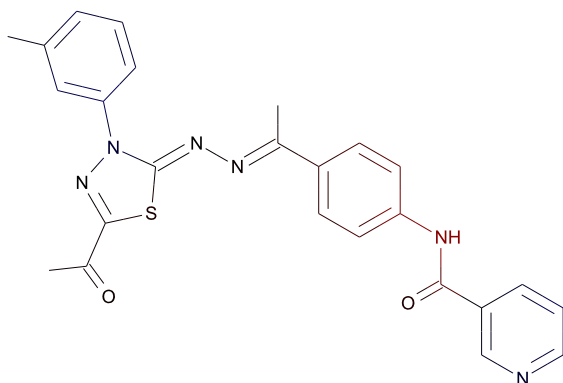

$C_{25}H_{22}N_6O_2S$

Molecular Weight: 470.54617

ALogP: 4.08

Rotatable Bonds: 6

Acceptors: 8

Donors: 1

## Model Prediction

**Prediction: Multiple-Carcinogen**

Probability: 0.537

Enrichment: 1.44

Bayesian Score: 1.89

Mahalanobis Distance: 17.3

Mahalanobis Distance p-value: 1.75e-008

Prediction: Positive if the Bayesian score is above the estimated best cutoff value from minimizing the false positive and false negative rate.

Probability: The estimated probability that the sample is in the positive category. This assumes that the Bayesian score follows a normal distribution and is different from the prediction using a cutoff.

Enrichment: An estimate of enrichment, that is, the increased likelihood (versus random) of this sample being in the category.

Bayesian Score: The standard Laplacian-modified Bayesian score.

Mahalanobis Distance: The Mahalanobis distance (MD) is the distance to the center of the training data. The larger the MD, the less trustworthy the prediction.

Mahalanobis Distance p-value: The p-value gives the fraction of training data with an MD greater than or equal to the one for the given sample, assuming normally distributed data. The smaller the p-value, the less trustworthy the prediction. For highly non-normal X properties (e.g., fingerprints), the MD p-value is wildly inaccurate.

## Structural Similar Compounds

| Name               | Nicardipine                                                         | Moricizine                                                          | Diltiazem                                                           |
|--------------------|---------------------------------------------------------------------|---------------------------------------------------------------------|---------------------------------------------------------------------|
| Structure          |                                                                     |                                                                     |                                                                     |
| Actual Endpoint    | Single-Carcinogen                                                   | Single-Carcinogen                                                   | Multiple-Carcinogen                                                 |
| Predicted Endpoint | Single-Carcinogen                                                   | Single-Carcinogen                                                   | Multiple-Carcinogen                                                 |
| Distance           | 0.660                                                               | 0.660                                                               | 0.738                                                               |
| Reference          | US FDA (Centre for Drug Eval.& Res./Off. Testing & Res.) Sept. 1997 | US FDA (Centre for Drug Eval.& Res./Off. Testing & Res.) Sept. 1997 | US FDA (Centre for Drug Eval.& Res./Off. Testing & Res.) Sept. 1997 |

## Model Applicability

Unknown features are fingerprint features in the query molecule, but not found or appearing too infrequently in the training set.

- OPS PC12 out of range. Value: 3.5752. Training min, max, SD, explained variance: -2.8991, 3.0113, 1.313, 0.0255.

## Feature Contribution

| Top features for positive contribution |            |                                          |       |                                     |
|----------------------------------------|------------|------------------------------------------|-------|-------------------------------------|
| Fingerprint                            | Bit/Smiles | Feature Structure                        | Score | Multiple-Carcinogen in training set |
| SCFP_4                                 | 1631845520 | <br><chem>[*]C(=[*])N[c]([*]):[*]</chem> | 0.601 | 6 out of 9                          |

|                                        |             |                                                                                                                                         |        |                                     |
|----------------------------------------|-------------|-----------------------------------------------------------------------------------------------------------------------------------------|--------|-------------------------------------|
| SCFP_4                                 | 17          | 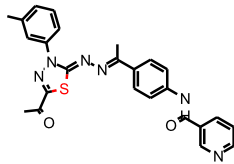<br>[*]S[*]                                          | 0.548  | 10 out of 17                        |
| SCFP_4                                 | -1375926917 | <br>[*]N[c]1:[cH]:[*]:[c]<br>([*]):[cH]:[cH]:1       | 0.522  | 6 out of 10                         |
| Top Features for negative contribution |             |                                                                                                                                         |        |                                     |
| Fingerprint                            | Bit/Smiles  | Feature Structure                                                                                                                       | Score  | Multiple-Carcinogen in training set |
| SCFP_4                                 | 1188429584  | <br>[*][c]1:[*]:[cH]:[cH]<br>:n:[cH]:1               | -0.666 | 0 out of 3                          |
| SCFP_4                                 | -352263424  | <br>[*]N([*])[c]1:[cH]:[*]<br>]:[cH]:[c](C):[cH]:1 | -0.489 | 0 out of 2                          |
| SCFP_4                                 | -1212387212 | <br>[*][c]1:[*]:[cH]:[cH]<br>:[c](C):[cH]:1        | -0.489 | 0 out of 2                          |



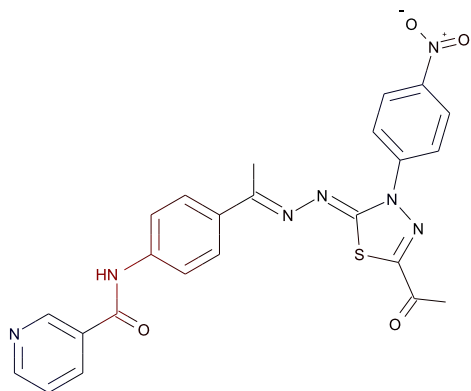

$C_{24}H_{19}N_7O_4S$

Molecular Weight: 501.51715

ALogP: 3.488

Rotatable Bonds: 7

Acceptors: 10

Donors: 1

## Model Prediction

**Prediction: Multiple-Carcinogen**

Probability: 0.632

Enrichment: 1.69

Bayesian Score: 3.92

Mahalanobis Distance: 23.4

Mahalanobis Distance p-value: 5.51e-014

Prediction: Positive if the Bayesian score is above the estimated best cutoff value from minimizing the false positive and false negative rate.

Probability: The estimated probability that the sample is in the positive category. This assumes that the Bayesian score follows a normal distribution and is different from the prediction using a cutoff.

Enrichment: An estimate of enrichment, that is, the increased likelihood (versus random) of this sample being in the category.

Bayesian Score: The standard Laplacian-modified Bayesian score.

Mahalanobis Distance: The Mahalanobis distance (MD) is the distance to the center of the training data. The larger the MD, the less trustworthy the prediction.

Mahalanobis Distance p-value: The p-value gives the fraction of training data with an MD greater than or equal to the one for the given sample, assuming normally distributed data. The smaller the p-value, the less trustworthy the prediction. For highly non-normal X properties (e.g., fingerprints), the MD p-value is wildly inaccurate.

## Structural Similar Compounds

| Name               | Nicardipine                                                         | Deserpidine                                                         | Reserpine                                                           |
|--------------------|---------------------------------------------------------------------|---------------------------------------------------------------------|---------------------------------------------------------------------|
| Structure          |                                                                     |                                                                     |                                                                     |
| Actual Endpoint    | Single-Carcinogen                                                   | Single-Carcinogen                                                   | Single-Carcinogen                                                   |
| Predicted Endpoint | Single-Carcinogen                                                   | Single-Carcinogen                                                   | Single-Carcinogen                                                   |
| Distance           | 0.746                                                               | 0.837                                                               | 0.839                                                               |
| Reference          | US FDA (Centre for Drug Eval.& Res./Off. Testing & Res.) Sept. 1997 | US FDA (Centre for Drug Eval.& Res./Off. Testing & Res.) Sept. 1997 | US FDA (Centre for Drug Eval.& Res./Off. Testing & Res.) Sept. 1997 |

## Model Applicability

Unknown features are fingerprint features in the query molecule, but not found or appearing too infrequently in the training set.

1. Num\_H\_Acceptors out of range. Value: 10. Training min, max, mean, SD: 0, 9, 3.9512, 2.048.

## Feature Contribution

### Top features for positive contribution

| Fingerprint | Bit/Smiles | Feature Structure                             | Score | Multiple-Carcinogen in training set |
|-------------|------------|-----------------------------------------------|-------|-------------------------------------|
| SCFP_4      | 1631845520 | <p><chem>[*]C(=[*])N[c](:[*]):[*]]</chem></p> | 0.601 | 6 out of 9                          |

|                                        |             |                                                                                                                                      |        |                                     |
|----------------------------------------|-------------|--------------------------------------------------------------------------------------------------------------------------------------|--------|-------------------------------------|
| SCFP_4                                 | 17          | 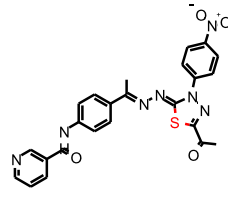<br>[*]S[*]                                       | 0.548  | 10 out of 17                        |
| SCFP_4                                 | -1375926917 | <br>[*]N[c]1:[cH]:[*]:[c]<br>([*]):[cH]:[cH]:1    | 0.522  | 6 out of 10                         |
| Top Features for negative contribution |             |                                                                                                                                      |        |                                     |
| Fingerprint                            | Bit/Smiles  | Feature Structure                                                                                                                    | Score  | Multiple-Carcinogen in training set |
| SCFP_4                                 | 1188429584  | <br>[*][c]1:[*]:[cH]:[cH]<br>:n:[cH]:1            | -0.666 | 0 out of 3                          |
| SCFP_4                                 | -758850909  | <br>[*][c]1:[*]:n:[cH]:[cH]<br>:[cH]:1          | -0.489 | 0 out of 2                          |
| SCFP_4                                 | -1380909229 | <br>[*]N([*])[c]1:[cH]:[*]<br>:[cH]:[cH]:[cH]:1 | -0.413 | 3 out of 16                         |



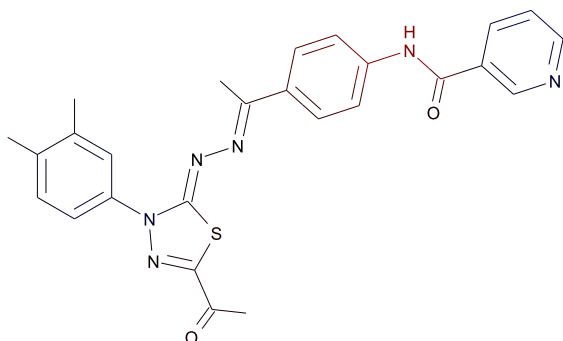

$C_{26}H_{24}N_6O_2S$

Molecular Weight: 484.57275

ALogP: 4.566

Rotatable Bonds: 6

Acceptors: 8

Donors: 1

## Model Prediction

Prediction: Multiple-Carcinogen

Probability: 0.565

Enrichment: 1.51

Bayesian Score: 2.47

Mahalanobis Distance: 17

Mahalanobis Distance p-value: 3.51e-008

Prediction: Positive if the Bayesian score is above the estimated best cutoff value from minimizing the false positive and false negative rate.

Probability: The estimated probability that the sample is in the positive category. This assumes that the Bayesian score follows a normal distribution and is different from the prediction using a cutoff.

Enrichment: An estimate of enrichment, that is, the increased likelihood (versus random) of this sample being in the category.

Bayesian Score: The standard Laplacian-modified Bayesian score.

Mahalanobis Distance: The Mahalanobis distance (MD) is the distance to the center of the training data. The larger the MD, the less trustworthy the prediction.

Mahalanobis Distance p-value: The p-value gives the fraction of training data with an MD greater than or equal to the one for the given sample, assuming normally distributed data. The smaller the p-value, the less trustworthy the prediction. For highly non-normal X properties (e.g., fingerprints), the MD p-value is wildly inaccurate.

## Structural Similar Compounds

| Name               | Nicardipine                                                         | Moricizine                                                          | Deserpidine                                                         |
|--------------------|---------------------------------------------------------------------|---------------------------------------------------------------------|---------------------------------------------------------------------|
| Structure          |                                                                     |                                                                     |                                                                     |
| Actual Endpoint    | Single-Carcinogen                                                   | Single-Carcinogen                                                   | Single-Carcinogen                                                   |
| Predicted Endpoint | Single-Carcinogen                                                   | Single-Carcinogen                                                   | Single-Carcinogen                                                   |
| Distance           | 0.669                                                               | 0.693                                                               | 0.719                                                               |
| Reference          | US FDA (Centre for Drug Eval.& Res./Off. Testing & Res.) Sept. 1997 | US FDA (Centre for Drug Eval.& Res./Off. Testing & Res.) Sept. 1997 | US FDA (Centre for Drug Eval.& Res./Off. Testing & Res.) Sept. 1997 |

## Model Applicability

Unknown features are fingerprint features in the query molecule, but not found or appearing too infrequently in the training set.

- OPS PC12 out of range. Value: 3.5196. Training min, max, SD, explained variance: -2.8991, 3.0113, 1.313, 0.0255.

## Feature Contribution

| Top features for positive contribution |            |                                               |       |                                     |
|----------------------------------------|------------|-----------------------------------------------|-------|-------------------------------------|
| Fingerprint                            | Bit/Smiles | Feature Structure                             | Score | Multiple-Carcinogen in training set |
| SCFP_4                                 | 1631845520 | <p><chem>[*]C(=[*])N([c]([*]):[*])</chem></p> | 0.601 | 6 out of 9                          |

|                                        |             |                                                                                                                                    |        |                                     |
|----------------------------------------|-------------|------------------------------------------------------------------------------------------------------------------------------------|--------|-------------------------------------|
| SCFP_4                                 | 17          | 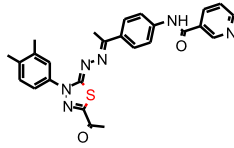<br>[*]S[*]                                     | 0.548  | 10 out of 17                        |
| SCFP_4                                 | -1375926917 | <br>[*]N[c]1:[cH]:[*]:[c]<br>([*]):[cH]:[cH]:1  | 0.522  | 6 out of 10                         |
| Top Features for negative contribution |             |                                                                                                                                    |        |                                     |
| Fingerprint                            | Bit/Smiles  | Feature Structure                                                                                                                  | Score  | Multiple-Carcinogen in training set |
| SCFP_4                                 | 1188429584  | <br>[*][c]1:[*]:[cH]:[cH]<br>:n:[cH]:1          | -0.666 | 0 out of 3                          |
| SCFP_4                                 | -758850909  | <br>[*][c]1:[*]:n:[cH]:[cH]:[cH]:1            | -0.489 | 0 out of 2                          |
| SCFP_4                                 | -352263424  | <br>[*]N([*])[c]1:[cH]:[*]:[cH]:[c](C):[cH]:1 | -0.489 | 0 out of 2                          |





7a

## TOPKAT\_Rat\_Male\_FDA\_None\_vs\_Carcinogen

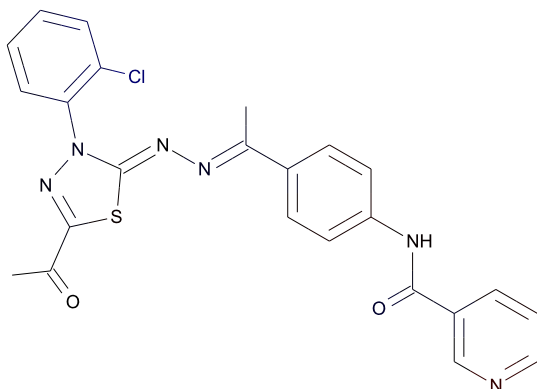C<sub>24</sub>H<sub>19</sub>ClN<sub>6</sub>O<sub>2</sub>S

Molecular Weight: 490.96466

ALogP: 4.258

Rotatable Bonds: 6

Acceptors: 8

Donors: 1

**Model Prediction**

Prediction: Non-Carcinogen

Probability: 0.333

Enrichment: 0.996

Bayesian Score: -0.84

Mahalanobis Distance: 17.1

Mahalanobis Distance p-value: 1.78e-011

Prediction: Positive if the Bayesian score is above the estimated best cutoff value from minimizing the false positive and false negative rate.

Probability: The estimated probability that the sample is in the positive category. This assumes that the Bayesian score follows a normal distribution and is different from the prediction using a cutoff.

Enrichment: An estimate of enrichment, that is, the increased likelihood (versus random) of this sample being in the category.

Bayesian Score: The standard Laplacian-modified Bayesian score.

Mahalanobis Distance: The Mahalanobis distance (MD) is the distance to the center of the training data. The larger the MD, the less trustworthy the prediction.

Mahalanobis Distance p-value: The p-value gives the fraction of training data with an MD greater than or equal to the one for the given sample, assuming normally distributed data. The smaller the p-value, the less trustworthy the prediction. For highly non-normal X properties (e.g., fingerprints), the MD p-value is wildly inaccurate.

**Structural Similar Compounds**

| Name               | Carbenicillin                                                       | Moricizine                                                          | Doxazosin                                                           |
|--------------------|---------------------------------------------------------------------|---------------------------------------------------------------------|---------------------------------------------------------------------|
| Structure          |                                                                     |                                                                     |                                                                     |
| Actual Endpoint    | Non-Carcinogen                                                      | Carcinogen                                                          | Non-Carcinogen                                                      |
| Predicted Endpoint | Non-Carcinogen                                                      | Carcinogen                                                          | Non-Carcinogen                                                      |
| Distance           | 0.658                                                               | 0.690                                                               | 0.695                                                               |
| Reference          | US FDA (Centre for Drug Eval.& Res./Off. Testing & Res.) Sept. 1997 | US FDA (Centre for Drug Eval.& Res./Off. Testing & Res.) Sept. 1997 | US FDA (Centre for Drug Eval.& Res./Off. Testing & Res.) Sept. 1997 |

**Model Applicability**

Unknown features are fingerprint features in the query molecule, but not found or appearing too infrequently in the training set.

1. OPS PC1 out of range. Value: -5.8913. Training min, max, SD, explained variance: -5.694, 8.348, 2.949, 0.0811.

**Feature Contribution**

| Top features for positive contribution |            |                                                                      |       |                            |
|----------------------------------------|------------|----------------------------------------------------------------------|-------|----------------------------|
| Fingerprint                            | Bit/Smiles | Feature Structure                                                    | Score | Carcinogen in training set |
| SCFP_6                                 | -347048986 | <br><chem>[*]C(=[*])N[c]1:[cH]:[cH]:[cH]:[*]:[cH]:[cH]:[cH]:1</chem> | 0.615 | 5 out of 7                 |

|                                        |            |                                                                                                                                      |        |                            |
|----------------------------------------|------------|--------------------------------------------------------------------------------------------------------------------------------------|--------|----------------------------|
| SCFP_6                                 | -105808146 | 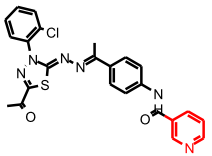<br>[*][c]1:[cH]:[cH]:[cH]<br>]:n:[cH]:1          | 0.415  | 1 out of 1                 |
| SCFP_6                                 | -758850909 | <br>[*][c]1:[*]:n:[cH]:[c<br>H]:[cH]:1            | 0.355  | 5 out of 10                |
| Top Features for negative contribution |            |                                                                                                                                      |        |                            |
| Fingerprint                            | Bit/Smiles | Feature Structure                                                                                                                    | Score  | Carcinogen in training set |
| SCFP_6                                 | 1557430596 | <br>[*]N([*])[c]1:[cH]:[*]<br>]:[cH]:[cH]:[c]:1Cl | -0.825 | 0 out of 4                 |
| SCFP_6                                 | 1257084377 | <br>[*]NC(=O)[c](:[*]):[*]<br>]                  | -0.436 | 4 out of 21                |
| SCFP_6                                 | -52074512  | <br>[*]:[c](:[*])Cl                             | -0.315 | 14 out of 61               |

7b

## TOPKAT\_Rat\_Male\_FDA\_None\_vs\_Carcinogen

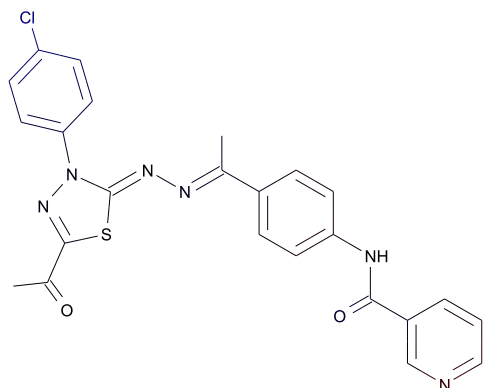C<sub>24</sub>H<sub>19</sub>ClN<sub>6</sub>O<sub>2</sub>S

Molecular Weight: 490.96465

ALogP: 4.258

Rotatable Bonds: 6

Acceptors: 8

Donors: 1

**Model Prediction**

Prediction: Non-Carcinogen

Probability: 0.322

Enrichment: 0.963

Bayesian Score: -1.25

Mahalanobis Distance: 16.5

Mahalanobis Distance p-value: 4.3e-010

Prediction: Positive if the Bayesian score is above the estimated best cutoff value from minimizing the false positive and false negative rate.

Probability: The estimated probability that the sample is in the positive category. This assumes that the Bayesian score follows a normal distribution and is different from the prediction using a cutoff.

Enrichment: An estimate of enrichment, that is, the increased likelihood (versus random) of this sample being in the category.

Bayesian Score: The standard Laplacian-modified Bayesian score.

Mahalanobis Distance: The Mahalanobis distance (MD) is the distance to the center of the training data. The larger the MD, the less trustworthy the prediction.

Mahalanobis Distance p-value: The p-value gives the fraction of training data with an MD greater than or equal to the one for the given sample, assuming normally distributed data. The smaller the p-value, the less trustworthy the prediction. For highly non-normal X properties (e.g., fingerprints), the MD p-value is wildly inaccurate.

**Structural Similar Compounds**

| Name               | Carbenicillin                                                       | Moricizine                                                          | Doxazosin                                                           |
|--------------------|---------------------------------------------------------------------|---------------------------------------------------------------------|---------------------------------------------------------------------|
| Structure          |                                                                     |                                                                     |                                                                     |
| Actual Endpoint    | Non-Carcinogen                                                      | Carcinogen                                                          | Non-Carcinogen                                                      |
| Predicted Endpoint | Non-Carcinogen                                                      | Carcinogen                                                          | Non-Carcinogen                                                      |
| Distance           | 0.661                                                               | 0.694                                                               | 0.698                                                               |
| Reference          | US FDA (Centre for Drug Eval.& Res./Off. Testing & Res.) Sept. 1997 | US FDA (Centre for Drug Eval.& Res./Off. Testing & Res.) Sept. 1997 | US FDA (Centre for Drug Eval.& Res./Off. Testing & Res.) Sept. 1997 |

**Model Applicability**

Unknown features are fingerprint features in the query molecule, but not found or appearing too infrequently in the training set.

1. OPS PC1 out of range. Value: -6.1431. Training min, max, SD, explained variance: -5.694, 8.348, 2.949, 0.0811.

**Feature Contribution**

| Top features for positive contribution |            |                                                                             |       |                            |
|----------------------------------------|------------|-----------------------------------------------------------------------------|-------|----------------------------|
| Fingerprint                            | Bit/Smiles | Feature Structure                                                           | Score | Carcinogen in training set |
| SCFP_6                                 | -347048986 | <br><chem>[*]C(=[*])N[c]1:[cH]:</chem><br><chem>[cH]:[*]:[cH]:[cH]:1</chem> | 0.615 | 5 out of 7                 |

|                                        |            |                                                                                                                                                      |        |                            |
|----------------------------------------|------------|------------------------------------------------------------------------------------------------------------------------------------------------------|--------|----------------------------|
| SCFP_6                                 | -105808146 | 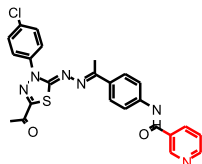<br><chem>[*][c]1:[cH]:[cH]:[cH]:[cH]:n:[cH]:1</chem>             | 0.415  | 1 out of 1                 |
| SCFP_6                                 | -758850909 | <br><chem>[*][c]1:[*]:n:[cH]:[cH]:[cH]:1</chem>                   | 0.355  | 5 out of 10                |
| Top Features for negative contribution |            |                                                                                                                                                      |        |                            |
| Fingerprint                            | Bit/Smiles | Feature Structure                                                                                                                                    | Score  | Carcinogen in training set |
| SCFP_6                                 | 341480432  | <br><chem>[*]N([*])[c]1:[cH]:[cH]:[cH]:[c](Cl):[cH]:[cH]:1</chem> | -0.674 | 0 out of 3                 |
| SCFP_6                                 | 1905487031 | <br><chem>[*][c]1:[cH]:[cH]:[c]:(Cl):[cH]:[cH]:1</chem>          | -0.48  | 2 out of 12                |
| SCFP_6                                 | 1257084377 | <br><chem>[*]NC(=O)[c](:[*]):[*]</chem>                         | -0.436 | 4 out of 21                |

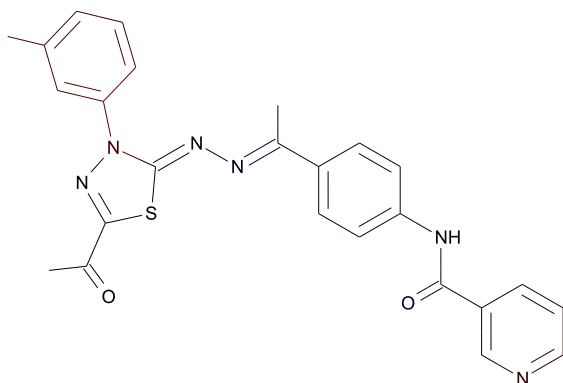

$C_{25}H_{22}N_6O_2S$

Molecular Weight: 470.54617

ALogP: 4.08

Rotatable Bonds: 6

Acceptors: 8

Donors: 1

## Model Prediction

Prediction: Carcinogen

Probability: 0.423

Enrichment: 1.27

Bayesian Score: 2.15

Mahalanobis Distance: 17.3

Mahalanobis Distance p-value: 7.26e-012

Prediction: Positive if the Bayesian score is above the estimated best cutoff value from minimizing the false positive and false negative rate.

Probability: The estimated probability that the sample is in the positive category. This assumes that the Bayesian score follows a normal distribution and is different from the prediction using a cutoff.

Enrichment: An estimate of enrichment, that is, the increased likelihood (versus random) of this sample being in the category.

Bayesian Score: The standard Laplacian-modified Bayesian score.

Mahalanobis Distance: The Mahalanobis distance (MD) is the distance to the center of the training data. The larger the MD, the less trustworthy the prediction.

Mahalanobis Distance p-value: The p-value gives the fraction of training data with an MD greater than or equal to the one for the given sample, assuming normally distributed data. The smaller the p-value, the less trustworthy the prediction. For highly non-normal X properties (e.g., fingerprints), the MD p-value is wildly inaccurate.

## Structural Similar Compounds

| Name               | Carbenicillin                                                       | Moricizine                                                          | Doxazosin                                                           |
|--------------------|---------------------------------------------------------------------|---------------------------------------------------------------------|---------------------------------------------------------------------|
| Structure          |                                                                     |                                                                     |                                                                     |
| Actual Endpoint    | Non-Carcinogen                                                      | Carcinogen                                                          | Non-Carcinogen                                                      |
| Predicted Endpoint | Non-Carcinogen                                                      | Carcinogen                                                          | Non-Carcinogen                                                      |
| Distance           | 0.650                                                               | 0.668                                                               | 0.675                                                               |
| Reference          | US FDA (Centre for Drug Eval.& Res./Off. Testing & Res.) Sept. 1997 | US FDA (Centre for Drug Eval.& Res./Off. Testing & Res.) Sept. 1997 | US FDA (Centre for Drug Eval.& Res./Off. Testing & Res.) Sept. 1997 |

## Model Applicability

Unknown features are fingerprint features in the query molecule, but not found or appearing too infrequently in the training set.

- OPS PC12 out of range. Value: -4.4024. Training min, max, SD, explained variance: -3.9196, 6.4101, 1.581, 0.0233.

## Feature Contribution

| Top features for positive contribution |            |                                                            |       |                            |
|----------------------------------------|------------|------------------------------------------------------------|-------|----------------------------|
| Fingerprint                            | Bit/Smiles | Feature Structure                                          | Score | Carcinogen in training set |
| SCFP_6                                 | -352263424 | <br><chem>[*]N([*])[c]1:[cH]:[*]:[cH]:[c](C):[cH]:1</chem> | 0.712 | 3 out of 3                 |

|                                        |            |                                                                                                                                          |        |                            |
|----------------------------------------|------------|------------------------------------------------------------------------------------------------------------------------------------------|--------|----------------------------|
| SCFP_6                                 | -347048986 | 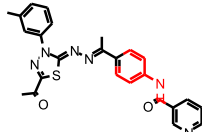<br>[*]C(=[*])N[c]1:[cH]:[cH]:[cH]:[*]:[cH]:[cH]:1    | 0.615  | 5 out of 7                 |
| SCFP_6                                 | 2052999617 | <br>[*][c]1:[cH]:[cH]:[cH]:[cH]:[cH]:[cH]:1           | 0.415  | 1 out of 1                 |
| Top Features for negative contribution |            |                                                                                                                                          |        |                            |
| Fingerprint                            | Bit/Smiles | Feature Structure                                                                                                                        | Score  | Carcinogen in training set |
| SCFP_6                                 | 1257084377 | <br>[*]NC(=O)[c](:[*]):[*]                            | -0.436 | 4 out of 21                |
| SCFP_6                                 | 124026986  | <br>[*]:[cH]:[c](:[cH]):[*]<br>])C(=O)N[c](:[*]):[*] | -0.278 | 0 out of 1                 |
| SCFP_6                                 | -537745313 | <br>[*]N=C(/C)[c]1:[cH]:[cH]:[cH]:[cH]:1            | -0.278 | 0 out of 1                 |

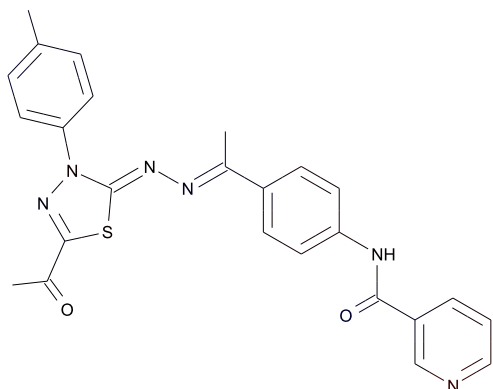

$C_{25}H_{22}N_6O_2S$

Molecular Weight: 470.54617

ALogP: 4.08

Rotatable Bonds: 6

Acceptors: 8

Donors: 1

## Model Prediction

**Prediction: Carcinogen**

Probability: 0.363

Enrichment: 1.09

Bayesian Score: 0.226

Mahalanobis Distance: 17.1

Mahalanobis Distance p-value: 1.71e-011

Prediction: Positive if the Bayesian score is above the estimated best cutoff value from minimizing the false positive and false negative rate.

Probability: The estimated probability that the sample is in the positive category. This assumes that the Bayesian score follows a normal distribution and is different from the prediction using a cutoff.

Enrichment: An estimate of enrichment, that is, the increased likelihood (versus random) of this sample being in the category.

Bayesian Score: The standard Laplacian-modified Bayesian score.

Mahalanobis Distance: The Mahalanobis distance (MD) is the distance to the center of the training data. The larger the MD, the less trustworthy the prediction.

Mahalanobis Distance p-value: The p-value gives the fraction of training data with an MD greater than or equal to the one for the given sample, assuming normally distributed data. The smaller the p-value, the less trustworthy the prediction. For highly non-normal X properties (e.g., fingerprints), the MD p-value is wildly inaccurate.

## Structural Similar Compounds

| Name               | Carbenicillin                                                       | Moricizine                                                          | Doxazosin                                                           |
|--------------------|---------------------------------------------------------------------|---------------------------------------------------------------------|---------------------------------------------------------------------|
| Structure          |                                                                     |                                                                     |                                                                     |
| Actual Endpoint    | Non-Carcinogen                                                      | Carcinogen                                                          | Non-Carcinogen                                                      |
| Predicted Endpoint | Non-Carcinogen                                                      | Carcinogen                                                          | Non-Carcinogen                                                      |
| Distance           | 0.653                                                               | 0.671                                                               | 0.678                                                               |
| Reference          | US FDA (Centre for Drug Eval.& Res./Off. Testing & Res.) Sept. 1997 | US FDA (Centre for Drug Eval.& Res./Off. Testing & Res.) Sept. 1997 | US FDA (Centre for Drug Eval.& Res./Off. Testing & Res.) Sept. 1997 |

## Model Applicability

Unknown features are fingerprint features in the query molecule, but not found or appearing too infrequently in the training set.

- OPS PC12 out of range. Value: -4.169. Training min, max, SD, explained variance: -3.9196, 6.4101, 1.581, 0.0233.

## Feature Contribution

| Top features for positive contribution |            |                                                            |       |                            |
|----------------------------------------|------------|------------------------------------------------------------|-------|----------------------------|
| Fingerprint                            | Bit/Smiles | Feature Structure                                          | Score | Carcinogen in training set |
| SCFP_6                                 | -347048986 | <p>[*]C(=[*])N[c]1:[cH]:[cH]:[cH]:[*]:[cH]:[cH]:[cH]:1</p> | 0.615 | 5 out of 7                 |





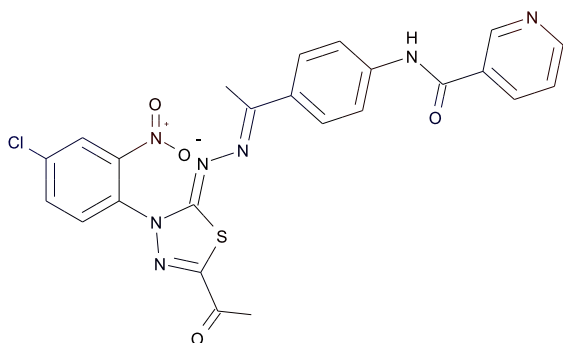

$C_{24}H_{18}ClN_7O_4S$

Molecular Weight: 535.96222

ALogP: 4.153

Rotatable Bonds: 7

Acceptors: 10

Donors: 1

## Model Prediction

Prediction: Non-Carcinogen

Probability: 0.319

Enrichment: 0.955

Bayesian Score: -1.36

Mahalanobis Distance: 19.8

Mahalanobis Distance p-value: 3e-018

Prediction: Positive if the Bayesian score is above the estimated best cutoff value from minimizing the false positive and false negative rate.

Probability: The estimated probability that the sample is in the positive category. This assumes that the Bayesian score follows a normal distribution and is different from the prediction using a cutoff.

Enrichment: An estimate of enrichment, that is, the increased likelihood (versus random) of this sample being in the category.

Bayesian Score: The standard Laplacian-modified Bayesian score.

Mahalanobis Distance: The Mahalanobis distance (MD) is the distance to the center of the training data. The larger the MD, the less trustworthy the prediction.

Mahalanobis Distance p-value: The p-value gives the fraction of training data with an MD greater than or equal to the one for the given sample, assuming normally distributed data. The smaller the p-value, the less trustworthy the prediction. For highly non-normal X properties (e.g., fingerprints), the MD p-value is wildly inaccurate.

## Structural Similar Compounds

| Name               | Doxazosin                                                           | Carbenicillin                                                       | Deserpidine                                                         |
|--------------------|---------------------------------------------------------------------|---------------------------------------------------------------------|---------------------------------------------------------------------|
| Structure          |                                                                     |                                                                     |                                                                     |
| Actual Endpoint    | Non-Carcinogen                                                      | Non-Carcinogen                                                      | Carcinogen                                                          |
| Predicted Endpoint | Non-Carcinogen                                                      | Non-Carcinogen                                                      | Carcinogen                                                          |
| Distance           | 0.780                                                               | 0.787                                                               | 0.794                                                               |
| Reference          | US FDA (Centre for Drug Eval.& Res./Off. Testing & Res.) Sept. 1997 | US FDA (Centre for Drug Eval.& Res./Off. Testing & Res.) Sept. 1997 | US FDA (Centre for Drug Eval.& Res./Off. Testing & Res.) Sept. 1997 |

## Model Applicability

Unknown features are fingerprint features in the query molecule, but not found or appearing too infrequently in the training set.

- OPS PC1 out of range. Value: -6.2502. Training min, max, SD, explained variance: -5.694, 8.348, 2.949, 0.0811.

## Feature Contribution

| Top features for positive contribution |            |                                                                 |       |                            |
|----------------------------------------|------------|-----------------------------------------------------------------|-------|----------------------------|
| Fingerprint                            | Bit/Smiles | Feature Structure                                               | Score | Carcinogen in training set |
| SCFP_6                                 | -347048986 | <br><chem>[*]C(=[*])N[c]1:[cH]:[cH]:[*]:[cH]:[cH]:[cH]:1</chem> | 0.615 | 5 out of 7                 |

|                                        |            |                                                                                                                                                         |        |                            |
|----------------------------------------|------------|---------------------------------------------------------------------------------------------------------------------------------------------------------|--------|----------------------------|
| SCFP_6                                 | 1907765814 | 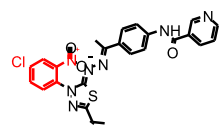<br><chem>[*][c]1:[cH]:[cH]:[c] (Cl):[cH]:[c]:1[N+]( =[*])[*]</chem> | 0.603  | 2 out of 2                 |
| SCFP_6                                 | -105808146 | <br><chem>[*][c]1:[cH]:[cH]:[cH]:[cH] ]:n:[cH]:1</chem>              | 0.415  | 1 out of 1                 |
| Top Features for negative contribution |            |                                                                                                                                                         |        |                            |
| Fingerprint                            | Bit/Smiles | Feature Structure                                                                                                                                       | Score  | Carcinogen in training set |
| SCFP_6                                 | 341480432  | <br><chem>[*]N([*])[c]1:[cH]:[c H]:[c](Cl):[cH]:[cH] :1</chem>       | -0.674 | 0 out of 3                 |
| SCFP_6                                 | 1257084377 | <br><chem>[*]NC(=O)[c](:[*]):[*] ]</chem>                          | -0.436 | 4 out of 21                |
| SCFP_6                                 | -52074512  | <br><chem>[*]:[c](:[*])Cl</chem>                                   | -0.315 | 14 out of 61               |

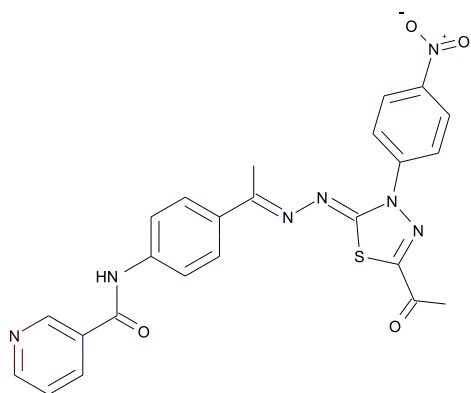

$C_{24}H_{19}N_7O_4S$

Molecular Weight: 501.51715

ALogP: 3.488

Rotatable Bonds: 7

Acceptors: 10

Donors: 1

## Model Prediction

Prediction: Non-Carcinogen

Probability: 0.345

Enrichment: 1.03

Bayesian Score: -0.393

Mahalanobis Distance: 20.1

Mahalanobis Distance p-value: 6.54e-019

Prediction: Positive if the Bayesian score is above the estimated best cutoff value from minimizing the false positive and false negative rate.

Probability: The estimated probability that the sample is in the positive category. This assumes that the Bayesian score follows a normal distribution and is different from the prediction using a cutoff.

Enrichment: An estimate of enrichment, that is, the increased likelihood (versus random) of this sample being in the category.

Bayesian Score: The standard Laplacian-modified Bayesian score.

Mahalanobis Distance: The Mahalanobis distance (MD) is the distance to the center of the training data. The larger the MD, the less trustworthy the prediction.

Mahalanobis Distance p-value: The p-value gives the fraction of training data with an MD greater than or equal to the one for the given sample, assuming normally distributed data. The smaller the p-value, the less trustworthy the prediction. For highly non-normal X properties (e.g., fingerprints), the MD p-value is wildly inaccurate.

## Structural Similar Compounds

| Name               | Doxazosin                                                           | Carbenicillin                                                       | Nimodipine                                                          |
|--------------------|---------------------------------------------------------------------|---------------------------------------------------------------------|---------------------------------------------------------------------|
| Structure          |                                                                     |                                                                     |                                                                     |
| Actual Endpoint    | Non-Carcinogen                                                      | Non-Carcinogen                                                      | Carcinogen                                                          |
| Predicted Endpoint | Non-Carcinogen                                                      | Non-Carcinogen                                                      | Carcinogen                                                          |
| Distance           | 0.734                                                               | 0.776                                                               | 0.783                                                               |
| Reference          | US FDA (Centre for Drug Eval.& Res./Off. Testing & Res.) Sept. 1997 | US FDA (Centre for Drug Eval.& Res./Off. Testing & Res.) Sept. 1997 | US FDA (Centre for Drug Eval.& Res./Off. Testing & Res.) Sept. 1997 |

## Model Applicability

Unknown features are fingerprint features in the query molecule, but not found or appearing too infrequently in the training set.

- OPS PC12 out of range. Value: -4.384. Training min, max, SD, explained variance: -3.9196, 6.4101, 1.581, 0.0233.

## Feature Contribution

### Top features for positive contribution

| Fingerprint | Bit/Smiles | Feature Structure                                     | Score | Carcinogen in training set |
|-------------|------------|-------------------------------------------------------|-------|----------------------------|
| SCFP_6      | -347048986 | <p>[*]C(=[*])N[c]1:[cH]:<br/>[cH]:[*]:[cH]:[cH]:1</p> | 0.615 | 5 out of 7                 |

|                                        |            |                                                                                                                                              |        |                            |
|----------------------------------------|------------|----------------------------------------------------------------------------------------------------------------------------------------------|--------|----------------------------|
| SCFP_6                                 | -105808146 | 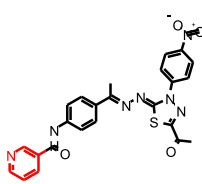<br>[*][c]1:[cH]:[cH]:[cH]<br>]:n:[cH]:1                  | 0.415  | 1 out of 1                 |
| SCFP_6                                 | 1311339974 | <br>[*][N+](=O)[*]                                        | 0.405  | 13 out of 26               |
| Top Features for negative contribution |            |                                                                                                                                              |        |                            |
| Fingerprint                            | Bit/Smiles | Feature Structure                                                                                                                            | Score  | Carcinogen in training set |
| SCFP_6                                 | 1257084377 | <br>[*]NC(=O)[c](:[*]):[*]<br>]                           | -0.436 | 4 out of 21                |
| SCFP_6                                 | -331724199 | <br>[*]N=C(/C)[c](:[*])<br>:[*]                          | -0.278 | 0 out of 1                 |
| SCFP_6                                 | 2096901122 | <br>[*]:[cH]:[c](NC(=O)[c]<br>](:[*]):[*]:[cH]:[*]<br>] | -0.278 | 0 out of 1                 |

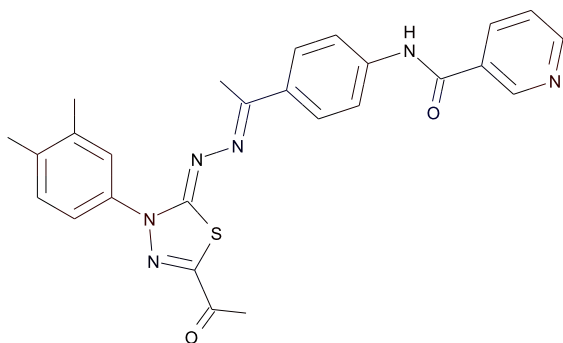

$C_{26}H_{24}N_6O_2S$

Molecular Weight: 484.57275

ALogP: 4.566

Rotatable Bonds: 6

Acceptors: 8

Donors: 1

## Model Prediction

Prediction: Carcinogen

Probability: 0.409

Enrichment: 1.22

Bayesian Score: 1.72

Mahalanobis Distance: 17.1

Mahalanobis Distance p-value: 1.48e-011

Prediction: Positive if the Bayesian score is above the estimated best cutoff value from minimizing the false positive and false negative rate.

Probability: The estimated probability that the sample is in the positive category. This assumes that the Bayesian score follows a normal distribution and is different from the prediction using a cutoff.

Enrichment: An estimate of enrichment, that is, the increased likelihood (versus random) of this sample being in the category.

Bayesian Score: The standard Laplacian-modified Bayesian score.

Mahalanobis Distance: The Mahalanobis distance (MD) is the distance to the center of the training data. The larger the MD, the less trustworthy the prediction.

Mahalanobis Distance p-value: The p-value gives the fraction of training data with an MD greater than or equal to the one for the given sample, assuming normally distributed data. The smaller the p-value, the less trustworthy the prediction. For highly non-normal X properties (e.g., fingerprints), the MD p-value is wildly inaccurate.

## Structural Similar Compounds

| Name               | Carbenicillin                                                       | Moricizine                                                          | Doxazosin                                                           |
|--------------------|---------------------------------------------------------------------|---------------------------------------------------------------------|---------------------------------------------------------------------|
| Structure          |                                                                     |                                                                     |                                                                     |
| Actual Endpoint    | Non-Carcinogen                                                      | Carcinogen                                                          | Non-Carcinogen                                                      |
| Predicted Endpoint | Non-Carcinogen                                                      | Carcinogen                                                          | Non-Carcinogen                                                      |
| Distance           | 0.669                                                               | 0.702                                                               | 0.716                                                               |
| Reference          | US FDA (Centre for Drug Eval.& Res./Off. Testing & Res.) Sept. 1997 | US FDA (Centre for Drug Eval.& Res./Off. Testing & Res.) Sept. 1997 | US FDA (Centre for Drug Eval.& Res./Off. Testing & Res.) Sept. 1997 |

## Model Applicability

Unknown features are fingerprint features in the query molecule, but not found or appearing too infrequently in the training set.

- OPS PC12 out of range. Value: -4.1817. Training min, max, SD, explained variance: -3.9196, 6.4101, 1.581, 0.0233.

## Feature Contribution

| Top features for positive contribution |            |                                               |       |                            |
|----------------------------------------|------------|-----------------------------------------------|-------|----------------------------|
| Fingerprint                            | Bit/Smiles | Feature Structure                             | Score | Carcinogen in training set |
| SCFP_6                                 | -352263424 | <br>[*]N([*])[c]1:[cH]:[*]:[cH]:[c](C):[cH]:1 | 0.712 | 3 out of 3                 |

|                                        |            |                                                                                                                                                    |        |                            |
|----------------------------------------|------------|----------------------------------------------------------------------------------------------------------------------------------------------------|--------|----------------------------|
| SCFP_6                                 | -347048986 | 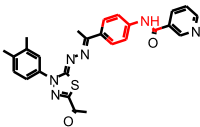<br><chem>[*]C(=[*])N[c]1:[cH]:[cH]:[cH]:[*]:[cH]:[cH]:1</chem> | 0.615  | 5 out of 7                 |
| SCFP_6                                 | -105808146 | <br><chem>[*][c]1:[cH]:[cH]:[cH]:[cH]:n:[cH]:1</chem>           | 0.415  | 1 out of 1                 |
| Top Features for negative contribution |            |                                                                                                                                                    |        |                            |
| Fingerprint                            | Bit/Smiles | Feature Structure                                                                                                                                  | Score  | Carcinogen in training set |
| SCFP_6                                 | 1257084377 | <br><chem>[*]NC(=O)[c](:[*]):[*]</chem>                         | -0.436 | 4 out of 21                |
| SCFP_6                                 | -537745313 | <br><chem>[*]N=C(/C)[c]1:[cH]:[cH]:[*]:[cH]:[cH]:1</chem>     | -0.278 | 0 out of 1                 |
| SCFP_6                                 | 2096901122 | <br><chem>[*]:[cH]:[c]([N](C=O)[c](:[*]):[*]):[cH]:[*]</chem> | -0.278 | 0 out of 1                 |

# Sorafenib

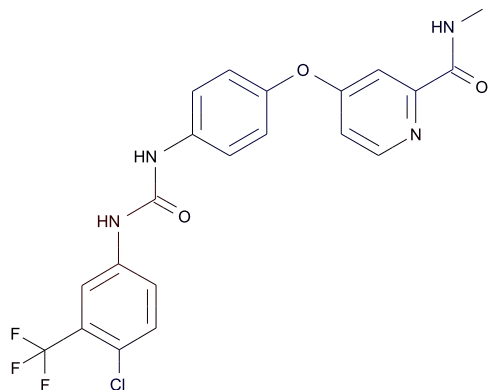

C<sub>21</sub>H<sub>16</sub>ClF<sub>3</sub>N<sub>4</sub>O<sub>3</sub>

Molecular Weight: 464.82494

ALogP: 4.175

Rotatable Bonds: 6

Acceptors: 4

Donors: 3

## Model Prediction

Prediction: Non-Carcinogen

Probability: 0.293

Enrichment: 0.878

Bayesian Score: -2.4

Mahalanobis Distance: 17.6

Mahalanobis Distance p-value: 1.1e-012

Prediction: Positive if the Bayesian score is above the estimated best cutoff value from minimizing the false positive and false negative rate.

Probability: The estimated probability that the sample is in the positive category. This assumes that the Bayesian score follows a normal distribution and is different from the prediction using a cutoff.

Enrichment: An estimate of enrichment, that is, the increased likelihood (versus random) of this sample being in the category.

Bayesian Score: The standard Laplacian-modified Bayesian score.

Mahalanobis Distance: The Mahalanobis distance (MD) is the distance to the center of the training data. The larger the MD, the less trustworthy the prediction.

Mahalanobis Distance p-value: The p-value gives the fraction of training data with an MD greater than or equal to the one for the given sample, assuming normally distributed data. The smaller the p-value, the less trustworthy the prediction. For highly non-normal X properties (e.g., fingerprints), the MD p-value is wildly inaccurate.

# TOPKAT\_Rat\_Male\_FDA\_None\_vs\_Carcinogen

## Structural Similar Compounds

| Name               | Glyburide                                                           | Glimepiride                                                         | Fluvastatin                                                         |
|--------------------|---------------------------------------------------------------------|---------------------------------------------------------------------|---------------------------------------------------------------------|
| Structure          |                                                                     |                                                                     |                                                                     |
| Actual Endpoint    | Non-Carcinogen                                                      | Non-Carcinogen                                                      | Carcinogen                                                          |
| Predicted Endpoint | Non-Carcinogen                                                      | Non-Carcinogen                                                      | Carcinogen                                                          |
| Distance           | 0.593                                                               | 0.600                                                               | 0.615                                                               |
| Reference          | US FDA (Centre for Drug Eval.& Res./Off. Testing & Res.) Sept. 1997 | US FDA (Centre for Drug Eval.& Res./Off. Testing & Res.) Sept. 1997 | US FDA (Centre for Drug Eval.& Res./Off. Testing & Res.) Sept. 1997 |

## Model Applicability

Unknown features are fingerprint features in the query molecule, but not found or appearing too infrequently in the training set.

1. All properties and OPS components are within expected ranges.

## Feature Contribution

### Top features for positive contribution

| Fingerprint | Bit/Smiles | Feature Structure                                | Score | Carcinogen in training set |
|-------------|------------|--------------------------------------------------|-------|----------------------------|
| SCFP_6      | -347048986 | <br>[*]C(=[*])N[c]:[cH]:<br>[cH]:[*]:[cH]:[cH]:1 | 0.615 | 5 out of 7                 |



|                                        |            |                                                                                                                                                    |        |                            |
|----------------------------------------|------------|----------------------------------------------------------------------------------------------------------------------------------------------------|--------|----------------------------|
| SCFP_6                                 | -754059116 | 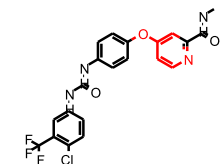<br>[*]O[c]1:[cH]:[*]:n:[cH]:[cH]:1                             | 0.415  | 1 out of 1                 |
| SCFP_6                                 | -531283893 | <br>[*]O[c]1:[cH]:[cH]:[c](NC(=[*]))[*]:[cH]:[cH]:1             | 0.273  | 2 out of 4                 |
| Top Features for negative contribution |            |                                                                                                                                                    |        |                            |
| Fingerprint                            | Bit/Smiles | Feature Structure                                                                                                                                  | Score  | Carcinogen in training set |
| SCFP_6                                 | -827073191 | <br>[*]C(=[*])[c]1:[cH]:[*]:[cH]:[cH]:n:1                       | -0.674 | 0 out of 3                 |
| SCFP_6                                 | -975241316 | <br>[*][c]1:[cH]:[cH]:[c](O[c]([cH]:[*]):[cH]:[*]):[cH]:[cH]:1 | -0.496 | 0 out of 2                 |
| SCFP_6                                 | -488587948 | <br>[*]:[e]([*])O[c]1:[cH]:[cH]:[cH]:[cH]:1                   | -0.496 | 0 out of 2                 |

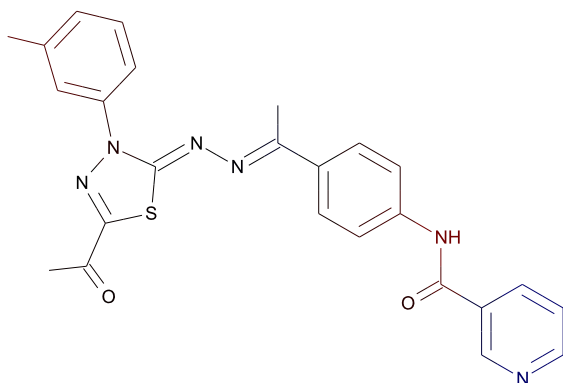

$C_{25}H_{22}N_6O_2S$

Molecular Weight: 470.54617

ALogP: 4.08

Rotatable Bonds: 6

Acceptors: 8

Donors: 1

## Model Prediction

**Prediction: Multiple-Carcinogen**

Probability: 0.569

Enrichment: 1.37

Bayesian Score: 1.5

Mahalanobis Distance: 15.6

Mahalanobis Distance p-value: 3.18e-006

Prediction: Positive if the Bayesian score is above the estimated best cutoff value from minimizing the false positive and false negative rate.

Probability: The estimated probability that the sample is in the positive category. This assumes that the Bayesian score follows a normal distribution and is different from the prediction using a cutoff.

Enrichment: An estimate of enrichment, that is, the increased likelihood (versus random) of this sample being in the category.

Bayesian Score: The standard Laplacian-modified Bayesian score.

Mahalanobis Distance: The Mahalanobis distance (MD) is the distance to the center of the training data. The larger the MD, the less trustworthy the prediction.

Mahalanobis Distance p-value: The p-value gives the fraction of training data with an MD greater than or equal to the one for the given sample, assuming normally distributed data. The smaller the p-value, the less trustworthy the prediction. For highly non-normal X properties (e.g., fingerprints), the MD p-value is wildly inaccurate.

## Structural Similar Compounds

| Name               | Moricizine                                                          | Isradipine                                                          | Nimodipine                                                          |
|--------------------|---------------------------------------------------------------------|---------------------------------------------------------------------|---------------------------------------------------------------------|
| Structure          |                                                                     |                                                                     |                                                                     |
| Actual Endpoint    | Single-Carcinogen                                                   | Single-Carcinogen                                                   | Single-Carcinogen                                                   |
| Predicted Endpoint | Single-Carcinogen                                                   | Single-Carcinogen                                                   | Single-Carcinogen                                                   |
| Distance           | 0.692                                                               | 0.745                                                               | 0.783                                                               |
| Reference          | US FDA (Centre for Drug Eval.& Res./Off. Testing & Res.) Sept. 1997 | US FDA (Centre for Drug Eval.& Res./Off. Testing & Res.) Sept. 1997 | US FDA (Centre for Drug Eval.& Res./Off. Testing & Res.) Sept. 1997 |

## Model Applicability

Unknown features are fingerprint features in the query molecule, but not found or appearing too infrequently in the training set.

- OPS PC14 out of range. Value: 3.6156. Training min, max, SD, explained variance: -3.4626, 3.2359, 1.286, 0.0225.

## Feature Contribution

| Top features for positive contribution |            |                                                       |       |                                     |
|----------------------------------------|------------|-------------------------------------------------------|-------|-------------------------------------|
| Fingerprint                            | Bit/Smiles | Feature Structure                                     | Score | Multiple-Carcinogen in training set |
| SCFP_8                                 | -347048986 | <p>[*]C(=[*])N[c]1:[cH]:<br/>[cH]:[*]:[cH]:[cH]:1</p> | 0.574 | 4 out of 5                          |

|                                        |            |                                                                                                                                               |        |                                     |
|----------------------------------------|------------|-----------------------------------------------------------------------------------------------------------------------------------------------|--------|-------------------------------------|
| SCFP_8                                 | 1631845520 | 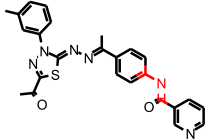<br><chem>[*]C(=[*])N[c](:[*]):</chem><br><chem>[*]</chem> | 0.495  | 6 out of 9                          |
| SCFP_8                                 | 1257084377 | <br><chem>[*]NC(=O)[c](:[*]):[*]</chem><br><chem>]</chem>  | 0.489  | 3 out of 4                          |
| Top Features for negative contribution |            |                                                                                                                                               |        |                                     |
| Fingerprint                            | Bit/Smiles | Feature Structure                                                                                                                             | Score  | Multiple-Carcinogen in training set |
| SCFP_8                                 | -758850909 | <br><chem>[*][c]1:[*]:n:[cH]:[cH]:[cH]:1</chem>            | -1.04  | 0 out of 5                          |
| SCFP_8                                 | -937094999 | <br><chem>[*]1:[cH]:[cH]:[cH]:n:[cH]:1</chem>            | -0.463 | 1 out of 6                          |
| SCFP_8                                 | 136627117  | <br><chem>[*]C(=[*])C</chem>                             | -0.41  | 4 out of 18                         |



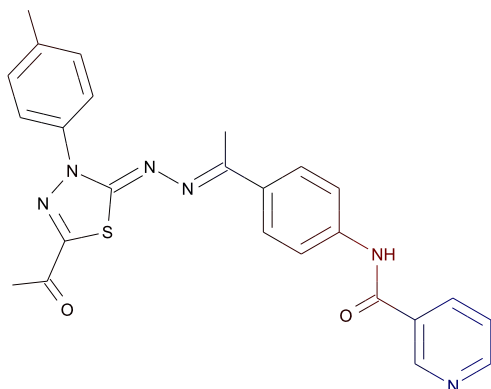

$C_{25}H_{22}N_6O_2S$

Molecular Weight: 470.54617

ALogP: 4.08

Rotatable Bonds: 6

Acceptors: 8

Donors: 1

## Model Prediction

Prediction: Single-Carcinogen

Probability: 0.568

Enrichment: 1.37

Bayesian Score: 0.701

Mahalanobis Distance: 17.1

Mahalanobis Distance p-value: 1.28e-007

Prediction: Positive if the Bayesian score is above the estimated best cutoff value from minimizing the false positive and false negative rate.

Probability: The estimated probability that the sample is in the positive category. This assumes that the Bayesian score follows a normal distribution and is different from the prediction using a cutoff.

Enrichment: An estimate of enrichment, that is, the increased likelihood (versus random) of this sample being in the category.

Bayesian Score: The standard Laplacian-modified Bayesian score.

Mahalanobis Distance: The Mahalanobis distance (MD) is the distance to the center of the training data. The larger the MD, the less trustworthy the prediction.

Mahalanobis Distance p-value: The p-value gives the fraction of training data with an MD greater than or equal to the one for the given sample, assuming normally distributed data. The smaller the p-value, the less trustworthy the prediction. For highly non-normal X properties (e.g., fingerprints), the MD p-value is wildly inaccurate.

## Structural Similar Compounds

| Name               | Moricizine                                                          | Isradipine                                                          | Nimodipine                                                          |
|--------------------|---------------------------------------------------------------------|---------------------------------------------------------------------|---------------------------------------------------------------------|
| Structure          |                                                                     |                                                                     |                                                                     |
| Actual Endpoint    | Single-Carcinogen                                                   | Single-Carcinogen                                                   | Single-Carcinogen                                                   |
| Predicted Endpoint | Single-Carcinogen                                                   | Single-Carcinogen                                                   | Single-Carcinogen                                                   |
| Distance           | 0.694                                                               | 0.749                                                               | 0.790                                                               |
| Reference          | US FDA (Centre for Drug Eval.& Res./Off. Testing & Res.) Sept. 1997 | US FDA (Centre for Drug Eval.& Res./Off. Testing & Res.) Sept. 1997 | US FDA (Centre for Drug Eval.& Res./Off. Testing & Res.) Sept. 1997 |

## Model Applicability

Unknown features are fingerprint features in the query molecule, but not found or appearing too infrequently in the training set.

- OPS PC14 out of range. Value: 3.4879. Training min, max, SD, explained variance: -3.4626, 3.2359, 1.286, 0.0225.

## Feature Contribution

| Top features for positive contribution |            |                                                        |       |                                     |
|----------------------------------------|------------|--------------------------------------------------------|-------|-------------------------------------|
| Fingerprint                            | Bit/Smiles | Feature Structure                                      | Score | Multiple-Carcinogen in training set |
| SCFP_8                                 | -347048986 | <br><chem>[*]C(=[*])N[c]1:[cH]:[cH]:[cH]:[cH]:1</chem> | 0.574 | 4 out of 5                          |

|                                        |            |                                                                                                                                    |        |                                     |
|----------------------------------------|------------|------------------------------------------------------------------------------------------------------------------------------------|--------|-------------------------------------|
| SCFP_8                                 | 1631845520 | 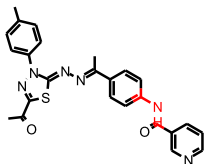<br><chem>[*]C(=[*])N[c](:[*]):[*]</chem>       | 0.495  | 6 out of 9                          |
| SCFP_8                                 | 1257084377 | <br><chem>[*]NC(=O)[c](:[*]):[*]</chem>         | 0.489  | 3 out of 4                          |
| Top Features for negative contribution |            |                                                                                                                                    |        |                                     |
| Fingerprint                            | Bit/Smiles | Feature Structure                                                                                                                  | Score  | Multiple-Carcinogen in training set |
| SCFP_8                                 | -758850909 | <br><chem>[*][c]1:[*]:n:[cH]:[cH]:[cH]:1</chem> | -1.04  | 0 out of 5                          |
| SCFP_8                                 | -937094999 | <br><chem>[*]1:[cH]:[cH]:[cH]:n:[cH]:1</chem> | -0.463 | 1 out of 6                          |
| SCFP_8                                 | 136627117  | <br><chem>[*]C(=[*])C</chem>                  | -0.41  | 4 out of 18                         |



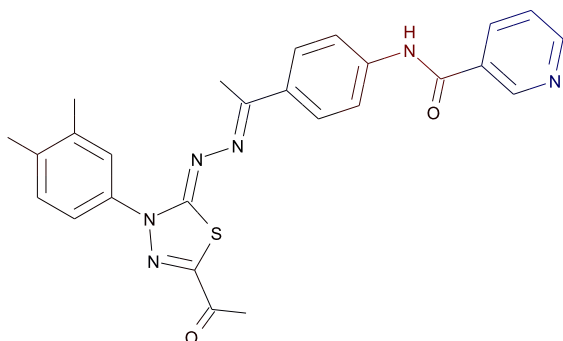

$C_{26}H_{24}N_6O_2S$

Molecular Weight: 484.57275

ALogP: 4.566

Rotatable Bonds: 6

Acceptors: 8

Donors: 1

## Model Prediction

**Prediction: Multiple-Carcinogen**

Probability: 0.568

Enrichment: 1.37

Bayesian Score: 0.803

Mahalanobis Distance: 17.2

Mahalanobis Distance p-value: 1.13e-007

Prediction: Positive if the Bayesian score is above the estimated best cutoff value from minimizing the false positive and false negative rate.

Probability: The estimated probability that the sample is in the positive category. This assumes that the Bayesian score follows a normal distribution and is different from the prediction using a cutoff.

Enrichment: An estimate of enrichment, that is, the increased likelihood (versus random) of this sample being in the category.

Bayesian Score: The standard Laplacian-modified Bayesian score.

Mahalanobis Distance: The Mahalanobis distance (MD) is the distance to the center of the training data. The larger the MD, the less trustworthy the prediction.

Mahalanobis Distance p-value: The p-value gives the fraction of training data with an MD greater than or equal to the one for the given sample, assuming normally distributed data. The smaller the p-value, the less trustworthy the prediction. For highly non-normal X properties (e.g., fingerprints), the MD p-value is wildly inaccurate.

## Structural Similar Compounds

| Name               | Moricizine                                                          | Deserpidine                                                         | Isradipine                                                          |
|--------------------|---------------------------------------------------------------------|---------------------------------------------------------------------|---------------------------------------------------------------------|
| Structure          |                                                                     |                                                                     |                                                                     |
| Actual Endpoint    | Single-Carcinogen                                                   | Single-Carcinogen                                                   | Single-Carcinogen                                                   |
| Predicted Endpoint | Single-Carcinogen                                                   | Multiple-Carcinogen                                                 | Single-Carcinogen                                                   |
| Distance           | 0.728                                                               | 0.765                                                               | 0.801                                                               |
| Reference          | US FDA (Centre for Drug Eval.& Res./Off. Testing & Res.) Sept. 1997 | US FDA (Centre for Drug Eval.& Res./Off. Testing & Res.) Sept. 1997 | US FDA (Centre for Drug Eval.& Res./Off. Testing & Res.) Sept. 1997 |

## Model Applicability

Unknown features are fingerprint features in the query molecule, but not found or appearing too infrequently in the training set.

- OPS PC14 out of range. Value: 3.561. Training min, max, SD, explained variance: -3.4626, 3.2359, 1.286, 0.0225.

## Feature Contribution

| Top features for positive contribution |            |                                                            |       |                                     |
|----------------------------------------|------------|------------------------------------------------------------|-------|-------------------------------------|
| Fingerprint                            | Bit/Smiles | Feature Structure                                          | Score | Multiple-Carcinogen in training set |
| SCFP_8                                 | -347048986 | <br><chem>[*]C(=[*])N[c]1:[cH]:[cH]:[*]:[cH]:[cH]:1</chem> | 0.574 | 4 out of 5                          |



|                                        |            |                                                                                                                                               |        |                                     |
|----------------------------------------|------------|-----------------------------------------------------------------------------------------------------------------------------------------------|--------|-------------------------------------|
| SCFP_8                                 | 1631845520 | 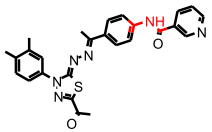<br><chem>[*]C(=[*])N[c](:[*]):</chem><br><chem>[*]</chem> | 0.495  | 6 out of 9                          |
| SCFP_8                                 | 1257084377 | <br><chem>[*]NC(=O)[c](:[*]):[*]</chem><br><chem>]</chem>  | 0.489  | 3 out of 4                          |
| Top Features for negative contribution |            |                                                                                                                                               |        |                                     |
| Fingerprint                            | Bit/Smiles | Feature Structure                                                                                                                             | Score  | Multiple-Carcinogen in training set |
| SCFP_8                                 | -758850909 | <br><chem>[*][c]1:[*]:n:[cH]:[cH]:[cH]:1</chem>            | -1.04  | 0 out of 5                          |
| SCFP_8                                 | -937094999 | <br><chem>[*]1:[cH]:[cH]:[cH]:n:[cH]:1</chem>            | -0.463 | 1 out of 6                          |
| SCFP_8                                 | 136627117  | <br><chem>[*]C(=[*])C</chem>                             | -0.41  | 4 out of 18                         |



7a

## TOPKAT\_Skin\_Irritancy\_None\_vs\_Irritant

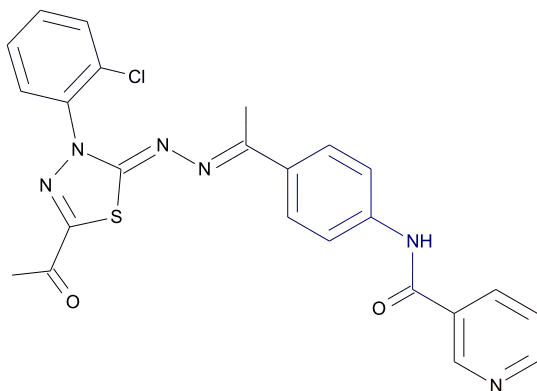
 $C_{24}H_{19}ClN_6O_2S$ 

Molecular Weight: 490.96466

ALogP: 4.258

Rotatable Bonds: 6

Acceptors: 8

Donors: 1

**Model Prediction**

Prediction: Non-Irritant

Probability: 0.9

Enrichment: 0.978

Bayesian Score: -2.75

Mahalanobis Distance: 10.9

Mahalanobis Distance p-value: 0.0042

Prediction: Positive if the Bayesian score is above the estimated best cutoff value from minimizing the false positive and false negative rate.

Probability: The estimated probability that the sample is in the positive category. This assumes that the Bayesian score follows a normal distribution and is different from the prediction using a cutoff.

Enrichment: An estimate of enrichment, that is, the increased likelihood (versus random) of this sample being in the category.

Bayesian Score: The standard Laplacian-modified Bayesian score.

Mahalanobis Distance: The Mahalanobis distance (MD) is the distance to the center of the training data. The larger the MD, the less trustworthy the prediction.

Mahalanobis Distance p-value: The p-value gives the fraction of training data with an MD greater than or equal to the one for the given sample, assuming normally distributed data. The smaller the p-value, the less trustworthy the prediction. For highly non-normal X properties (e.g., fingerprints), the MD p-value is wildly inaccurate.

**Structural Similar Compounds**

| Name               | Pregna-1,4-diene-3,20-dione, 21-(acetyloxy)-11-hydroxy-6-methyl-17- (1-oxopropoxy)-, (6- $\alpha$ ,11- $\beta$ )-                                                                | Benzenesulfonic acid, 2,2'-(4,4'-biphenylylene)d i-, disodium salt                                        | 2-Anthracenesulfonic acid, 1-amino-9,10-dihydro-9,10-dioxo-4-(2,4,6-trimethylanilino)-, monosodium salt                                             |
|--------------------|----------------------------------------------------------------------------------------------------------------------------------------------------------------------------------|-----------------------------------------------------------------------------------------------------------|-----------------------------------------------------------------------------------------------------------------------------------------------------|
| Structure          |                                                                                                                                                                                  |                                                                                                           |                                                                                                                                                     |
| Actual Endpoint    | Irritant                                                                                                                                                                         | Irritant                                                                                                  | Irritant                                                                                                                                            |
| Predicted Endpoint | Irritant                                                                                                                                                                         | Non-Irritant                                                                                              | Non-Irritant                                                                                                                                        |
| Distance           | 0.757                                                                                                                                                                            | 0.802                                                                                                     | 0.834                                                                                                                                               |
| Reference          | YACHDS Yakuri to Chiryo. Pharmacology and Therapeutics. (Raifu Saiensu Shup pan K.K., 2-5-13, Yaesu, Chuo-ku, Tokyo 104, Japan) V.1-1972- Volume(issue) /page/year: 19,3103,1991 | MVCRB3 MVC-Report. (Stockholm, Sweden) No.1-2, 1972-73. Discontinued. Volume(issue)/page/year: 2,193,1973 | 85JCAE "Prehled Prumyslove Toxikologie; Organické Latky," Marhold, J., Prague , Czechoslovakia, Avicenum, 1986 Volume(issue)/page/year: -,1327,1986 |

**Model Applicability**

Unknown features are fingerprint features in the query molecule, but not found or appearing too infrequently in the training set.

1. All properties and OPS components are within expected ranges.

**Feature Contribution**

| Top features for positive contribution |            |                   |       |                          |
|----------------------------------------|------------|-------------------|-------|--------------------------|
| Fingerprint                            | Bit/Smiles | Feature Structure | Score | Irritant in training set |
|                                        |            |                   |       |                          |

|                                        |             |                                                                                                                                                |        |                          |
|----------------------------------------|-------------|------------------------------------------------------------------------------------------------------------------------------------------------|--------|--------------------------|
| FCFP_12                                | -62776068   | 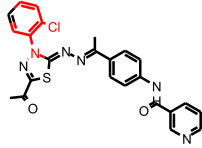<br><chem>[*]N([*])[c]1:[cH]:[*]:[cH]:[cH]:[c]:1Cl</chem>   | 0.0821 | 13 out of 13             |
| FCFP_12                                | -1986158408 | <br><chem>[*]N=C1/S[*]=[*]N1[*]</chem>                      | 0.0821 | 13 out of 13             |
| FCFP_12                                | -124655670  | <br><chem>[*][c](:[*]):[cH]:n:[*]</chem>                    | 0.0821 | 13 out of 13             |
| Top Features for negative contribution |             |                                                                                                                                                |        |                          |
| Fingerprint                            | Bit/Smiles  | Feature Structure                                                                                                                              | Score  | Irritant in training set |
| FCFP_12                                | -1838187238 | <br><chem>[*]C(=[*])N[c]1:[cH]:[cH]:[*]:[cH]:[cH]:1</chem> | -0.692 | 5 out of 12              |
| FCFP_12                                | 1294255210  | <br><chem>[*]C(=[*])N[c](:[*]):[*]</chem>                 | -0.486 | 12 out of 22             |

FCFP\_12

-773983804

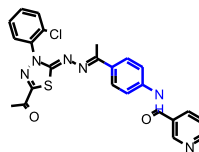

[\*]N[c]1:[cH]:[\*]:[c]  
([\*]):[cH]:[cH]:1

-0.444

46 out of 79

7b

## TOPKAT\_Skin\_Irritancy\_None\_vs\_Irritant

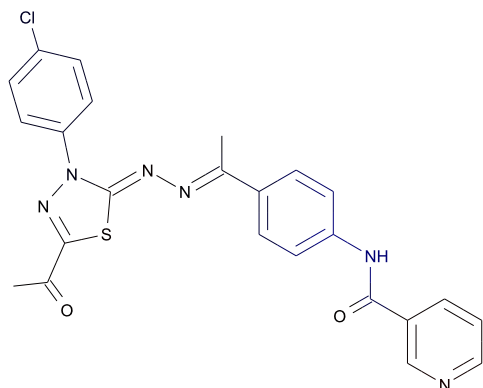C<sub>24</sub>H<sub>19</sub>ClN<sub>6</sub>O<sub>2</sub>S

Molecular Weight: 490.96465

ALogP: 4.258

Rotatable Bonds: 6

Acceptors: 8

Donors: 1

**Model Prediction**

Prediction: Non-Irritant

Probability: 0.864

Enrichment: 0.938

Bayesian Score: -3.1

Mahalanobis Distance: 10.9

Mahalanobis Distance p-value: 0.0042

Prediction: Positive if the Bayesian score is above the estimated best cutoff value from minimizing the false positive and false negative rate.

Probability: The estimated probability that the sample is in the positive category. This assumes that the Bayesian score follows a normal distribution and is different from the prediction using a cutoff.

Enrichment: An estimate of enrichment, that is, the increased likelihood (versus random) of this sample being in the category.

Bayesian Score: The standard Laplacian-modified Bayesian score.

Mahalanobis Distance: The Mahalanobis distance (MD) is the distance to the center of the training data. The larger the MD, the less trustworthy the prediction.

Mahalanobis Distance p-value: The p-value gives the fraction of training data with an MD greater than or equal to the one for the given sample, assuming normally distributed data. The smaller the p-value, the less trustworthy the prediction. For highly non-normal X properties (e.g., fingerprints), the MD p-value is wildly inaccurate.

**Structural Similar Compounds**

| Name               | Pregna-1,4-diene-3,20-dione, 21-(acetyloxy)-11-hydroxy-6-methyl-17- (1-oxopropoxy)-, (6- $\alpha$ ,11- $\beta$ )-                                                                | Benzenesulfonic acid, 2,2'-(4,4'-biphenylylene)d i-, disodium salt                                        | 2-Anthracenesulfonic acid, 1-amino-9,10-dihydro-9,10-dioxo-4-(2,4,6-trimethylanilino)-, monosodium salt                                            |
|--------------------|----------------------------------------------------------------------------------------------------------------------------------------------------------------------------------|-----------------------------------------------------------------------------------------------------------|----------------------------------------------------------------------------------------------------------------------------------------------------|
| Structure          |                                                                                                                                                                                  |                                                                                                           |                                                                                                                                                    |
| Actual Endpoint    | Irritant                                                                                                                                                                         | Irritant                                                                                                  | Irritant                                                                                                                                           |
| Predicted Endpoint | Irritant                                                                                                                                                                         | Non-Irritant                                                                                              | Non-Irritant                                                                                                                                       |
| Distance           | 0.758                                                                                                                                                                            | 0.806                                                                                                     | 0.837                                                                                                                                              |
| Reference          | YACHDS Yakuri to Chiryo. Pharmacology and Therapeutics. (Raifu Saiensu Shup pan K.K., 2-5-13, Yaesu, Chuo-ku, Tokyo 104, Japan) V.1-1972- Volume(issue) /page/year: 19,3103,1991 | MVCRB3 MVC-Report. (Stockholm, Sweden) No.1-2, 1972-73. Discontinued. Volume(issue)/page/year: 2,193,1973 | 85JCAE "Prehled Prumyslove Toxikologie; Organické Latky," Marhold, J., Prague, Czechoslovakia, Avicenum, 1986 Volume(issue)/page/year: -,1327,1986 |

**Model Applicability**

Unknown features are fingerprint features in the query molecule, but not found or appearing too infrequently in the training set.

1. All properties and OPS components are within expected ranges.

**Feature Contribution**

| Top features for positive contribution |            |                   |       |                          |
|----------------------------------------|------------|-------------------|-------|--------------------------|
| Fingerprint                            | Bit/Smiles | Feature Structure | Score | Irritant in training set |
|                                        |            |                   |       |                          |

|                                        |             |                                                                                                                                   |        |                          |
|----------------------------------------|-------------|-----------------------------------------------------------------------------------------------------------------------------------|--------|--------------------------|
| FCFP_12                                | -124655670  | 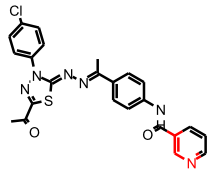<br>[*][c](:[*]):[cH]:n:[*]                    | 0.0821 | 13 out of 13             |
| FCFP_12                                | -1986158408 | <br>[*]N=C1/S[*]=[*]N1[']                      | 0.0821 | 13 out of 13             |
| FCFP_12                                | -1695756380 | <br>[*]1:[cH]:[cH]:[cH]:n:[cH]:1               | 0.0772 | 7 out of 7               |
| Top Features for negative contribution |             |                                                                                                                                   |        |                          |
| Fingerprint                            | Bit/Smiles  | Feature Structure                                                                                                                 | Score  | Irritant in training set |
| FCFP_12                                | -1838187238 | <br>[*]C(=[*])N[c]1:[cH]:[cH]:[*]:[cH]:[cH]:1 | -0.692 | 5 out of 12              |
| FCFP_12                                | 1294255210  | <br>[*]C(=[*])N[c](:[*]):[*]                 | -0.486 | 12 out of 22             |

FCFP\_12

-773983804

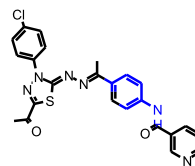

[\*]N[c]1:[cH]:[\*]:[c]  
([\*]):[cH]:[cH]:1

-0.444

46 out of 79



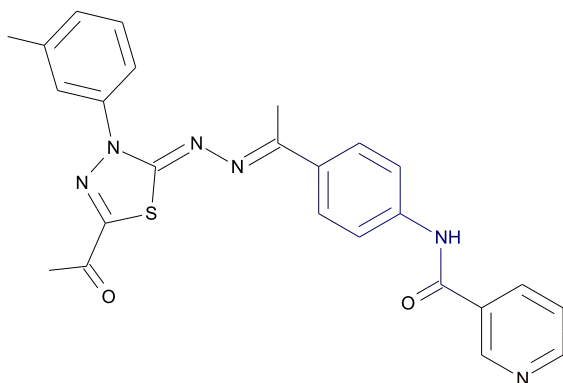
 $C_{25}H_{22}N_6O_2S$ 

Molecular Weight: 470.54617

ALogP: 4.08

Rotatable Bonds: 6

Acceptors: 8

Donors: 1

## Model Prediction

Prediction: Non-Irritant

Probability: 0.928

Enrichment: 1.01

Bayesian Score: -2.37

Mahalanobis Distance: 10.4

Mahalanobis Distance p-value: 0.0209

Prediction: Positive if the Bayesian score is above the estimated best cutoff value from minimizing the false positive and false negative rate.

Probability: The estimated probability that the sample is in the positive category. This assumes that the Bayesian score follows a normal distribution and is different from the prediction using a cutoff.

Enrichment: An estimate of enrichment, that is, the increased likelihood (versus random) of this sample being in the category.

Bayesian Score: The standard Laplacian-modified Bayesian score.

Mahalanobis Distance: The Mahalanobis distance (MD) is the distance to the center of the training data. The larger the MD, the less trustworthy the prediction.

Mahalanobis Distance p-value: The p-value gives the fraction of training data with an MD greater than or equal to the one for the given sample, assuming normally distributed data. The smaller the p-value, the less trustworthy the prediction. For highly non-normal X properties (e.g., fingerprints), the MD p-value is wildly inaccurate.

## Structural Similar Compounds

| Name               | Pregna-1,4-diene-3,20-dione, 21-(acetyloxy)-11-hydroxy-6-methyl-17- (1-oxopropoxy)-, (6- $\alpha$ ,11- $\beta$ )-                                                                | 2-Anthracenesulfonic acid, 1-amino-9,10-dihydro-9,10-dioxo-4-(2,4,6-trimethylanilino)-, monosodium salt                                             | Benzenesulfonic acid, 2,2'-(4,4'-biphenylenedivinylene)d i-, disodium salt                                |
|--------------------|----------------------------------------------------------------------------------------------------------------------------------------------------------------------------------|-----------------------------------------------------------------------------------------------------------------------------------------------------|-----------------------------------------------------------------------------------------------------------|
| Structure          |                                                                                                                                                                                  |                                                                                                                                                     |                                                                                                           |
| Actual Endpoint    | Irritant                                                                                                                                                                         | Irritant                                                                                                                                            | Irritant                                                                                                  |
| Predicted Endpoint | Irritant                                                                                                                                                                         | Non-Irritant                                                                                                                                        | Non-Irritant                                                                                              |
| Distance           | 0.729                                                                                                                                                                            | 0.807                                                                                                                                               | 0.819                                                                                                     |
| Reference          | YACHDS Yakuri to Chiryo. Pharmacology and Therapeutics. (Raifu Saiensu Shup pan K.K., 2-5-13, Yaesu, Chuo-ku, Tokyo 104, Japan) V.1-1972- Volume(issue) /page/year: 19,3103,1991 | 85JCAE "Prehled Prumyslove Toxikologie; Organicke Latky," Marhold, J., Prague , Czechoslovakia, Avicenum, 1986 Volume(issue)/page/year: -,1327,1986 | MVCRB3 MVC-Report. (Stockholm, Sweden) No.1-2, 1972-73. Discontinued. Volume(issue)/page/year: 2,193,1973 |

## Model Applicability

Unknown features are fingerprint features in the query molecule, but not found or appearing too infrequently in the training set.

1. All properties and OPS components are within expected ranges.

## Feature Contribution

| Top features for positive contribution |            |                   |       |                          |
|----------------------------------------|------------|-------------------|-------|--------------------------|
| Fingerprint                            | Bit/Smiles | Feature Structure | Score | Irritant in training set |
|                                        |            |                   |       |                          |

| FCFP_12                                | -124655670  | 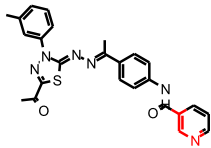<br><chem>[*][c](:[*]):[cH]:n:[*]</chem>                     | 0.0821 | 13 out of 13             |
|----------------------------------------|-------------|-------------------------------------------------------------------------------------------------------------------------------------------------|--------|--------------------------|
| FCFP_12                                | -1986158408 | <br><chem>[*]N=C1/S[*]=[*]N1[*]</chem>                       | 0.0821 | 13 out of 13             |
| FCFP_12                                | -1695756380 | <br><chem>[*]1:[cH]:[cH]:[cH]:n:[cH]:1</chem>                | 0.0772 | 7 out of 7               |
| Top Features for negative contribution |             |                                                                                                                                                 |        |                          |
| Fingerprint                            | Bit/Smiles  | Feature Structure                                                                                                                               | Score  | Irritant in training set |
| FCFP_12                                | -1838187238 | <br><chem>[*]C(=[*])N[c]1:[cH]:[cH]:[*]:[cH]:[cH]:1</chem> | -0.692 | 5 out of 12              |
| FCFP_12                                | 1294255210  | <br><chem>[*]C(=[*])N[c](:[*]):[*]</chem>                  | -0.486 | 12 out of 22             |

|         |            |                                                                                                                                            |        |              |
|---------|------------|--------------------------------------------------------------------------------------------------------------------------------------------|--------|--------------|
| FCFP_12 | -773983804 | 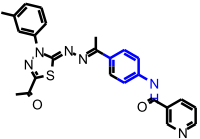<br><chem>[*]N[c]1:[cH]:[*]:[c]([*]):[cH]:[cH]:1</chem> | -0.444 | 46 out of 79 |
|---------|------------|--------------------------------------------------------------------------------------------------------------------------------------------|--------|--------------|

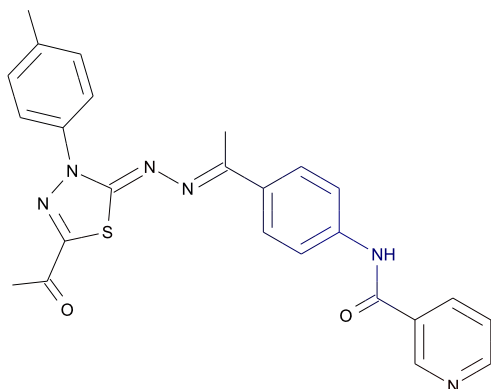

$C_{25}H_{22}N_6O_2S$

Molecular Weight: 470.54617

ALogP: 4.08

Rotatable Bonds: 6

Acceptors: 8

Donors: 1

## Model Prediction

Prediction: Non-Irritant

Probability: 0.932

Enrichment: 1.01

Bayesian Score: -2.29

Mahalanobis Distance: 10.4

Mahalanobis Distance p-value: 0.0209

Prediction: Positive if the Bayesian score is above the estimated best cutoff value from minimizing the false positive and false negative rate.

Probability: The estimated probability that the sample is in the positive category. This assumes that the Bayesian score follows a normal distribution and is different from the prediction using a cutoff.

Enrichment: An estimate of enrichment, that is, the increased likelihood (versus random) of this sample being in the category.

Bayesian Score: The standard Laplacian-modified Bayesian score.

Mahalanobis Distance: The Mahalanobis distance (MD) is the distance to the center of the training data. The larger the MD, the less trustworthy the prediction.

Mahalanobis Distance p-value: The p-value gives the fraction of training data with an MD greater than or equal to the one for the given sample, assuming normally distributed data. The smaller the p-value, the less trustworthy the prediction. For highly non-normal X properties (e.g., fingerprints), the MD p-value is wildly inaccurate.

## Structural Similar Compounds

| Name               | Pregna-1,4-diene-3,20-dione, 21-(acetyloxy)-11-hydroxy-6-methyl-17- (1-oxopropoxy)-, (6- $\alpha$ ,11- $\beta$ )-                                                                | 2-Anthracenesulfonic acid, 1-amino-9,10-dihydro-9,10-dioxo-4-(2,4,6-trimethylanilino)-, monosodium salt                                             | Benzenesulfonic acid, 2,2'-(4,4'-biphenylenedivinylene)d i-, disod ium salt                                |
|--------------------|----------------------------------------------------------------------------------------------------------------------------------------------------------------------------------|-----------------------------------------------------------------------------------------------------------------------------------------------------|------------------------------------------------------------------------------------------------------------|
| Structure          |                                                                                                                                                                                  |                                                                                                                                                     |                                                                                                            |
| Actual Endpoint    | Irritant                                                                                                                                                                         | Irritant                                                                                                                                            | Irritant                                                                                                   |
| Predicted Endpoint | Irritant                                                                                                                                                                         | Non-Irritant                                                                                                                                        | Non-Irritant                                                                                               |
| Distance           | 0.729                                                                                                                                                                            | 0.811                                                                                                                                               | 0.823                                                                                                      |
| Reference          | YACHDS Yakuri to Chiryo. Pharmacology and Therapeutics. (Raifu Saiensu Shup pan K.K., 2-5-13, Yaesu, Chuo-ku, Tokyo 104, Japan) V.1-1972- Volume(issue) /page/year: 19,3103,1991 | 85JCAE "Prehled Prumyslove Toxikologie; Organicke Latky," Marhold, J., Prague , Czechoslovakia, Avicenum, 1986 Volume(issue)/page/year: -,1327,1986 | MVCRB3 MVC-Report. (Stockholm, Sweden) No.1-2, 1972-73. Discontinued. Volu me(issue)/page/year: 2,193,1973 |

## Model Applicability

Unknown features are fingerprint features in the query molecule, but not found or appearing too infrequently in the training set.

1. All properties and OPS components are within expected ranges.

## Feature Contribution

| Top features for positive contribution |            |                   |       |                          |
|----------------------------------------|------------|-------------------|-------|--------------------------|
| Fingerprint                            | Bit/Smiles | Feature Structure | Score | Irritant in training set |
|                                        |            |                   |       |                          |

|                                        |             |                                                                                                                                                |        |                          |
|----------------------------------------|-------------|------------------------------------------------------------------------------------------------------------------------------------------------|--------|--------------------------|
| FCFP_12                                | -124655670  | 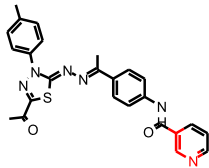<br><chem>[*][c](:[*]):[cH]:n:[*]</chem>                    | 0.0821 | 13 out of 13             |
| FCFP_12                                | -1986158408 | <br><chem>[*]N=C1/S[*]=[*]N1[ ]</chem>                      | 0.0821 | 13 out of 13             |
| FCFP_12                                | 633795852   | <br><chem>[*]N([*])[c]1:[cH]:[cH]:[c](C):[cH]:[cH]:1</chem> | 0.0785 | 8 out of 8               |
| Top Features for negative contribution |             |                                                                                                                                                |        |                          |
| Fingerprint                            | Bit/Smiles  | Feature Structure                                                                                                                              | Score  | Irritant in training set |
| FCFP_12                                | -1838187238 | <br><chem>[*]C(=[*])N[c]1:[cH]:[cH]:[*]:[cH]:[cH]:1</chem> | -0.692 | 5 out of 12              |
| FCFP_12                                | 1294255210  | <br><chem>[*]C(=[*])N[c](:[*]):[*]</chem>                 | -0.486 | 12 out of 22             |

FCFP\_12

-773983804

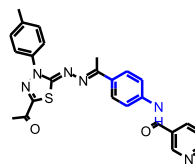

[\*]N[c]1:[cH]:[\*]:[c]  
([\*]):[cH]:[cH]:1

-0.444

46 out of 79

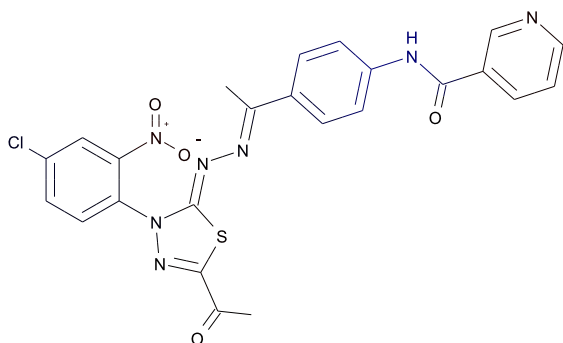

$C_{24}H_{18}ClN_7O_4S$

Molecular Weight: 535.96222

ALogP: 4.153

Rotatable Bonds: 7

Acceptors: 10

Donors: 1

## Model Prediction

Prediction: Non-Irritant

Probability: 0.922

Enrichment: 1

Bayesian Score: -2.46

Mahalanobis Distance: 11.9

Mahalanobis Distance p-value: 5.59e-005

Prediction: Positive if the Bayesian score is above the estimated best cutoff value from minimizing the false positive and false negative rate.

Probability: The estimated probability that the sample is in the positive category. This assumes that the Bayesian score follows a normal distribution and is different from the prediction using a cutoff.

Enrichment: An estimate of enrichment, that is, the increased likelihood (versus random) of this sample being in the category.

Bayesian Score: The standard Laplacian-modified Bayesian score.

Mahalanobis Distance: The Mahalanobis distance (MD) is the distance to the center of the training data. The larger the MD, the less trustworthy the prediction.

Mahalanobis Distance p-value: The p-value gives the fraction of training data with an MD greater than or equal to the one for the given sample, assuming normally distributed data. The smaller the p-value, the less trustworthy the prediction. For highly non-normal X properties (e.g., fingerprints), the MD p-value is wildly inaccurate.

## Structural Similar Compounds

| Name               | Benzenesulfonic acid, 2,2'-(1,4-anthraquinonylenediimino)bis(5-methyl-, disodium salt                                                              | 2,2'-Stilbenedisulfonic acid, 4,4'-dinitro-                                                                                                        | 3-Picoline                                                                                                                                                                     |
|--------------------|----------------------------------------------------------------------------------------------------------------------------------------------------|----------------------------------------------------------------------------------------------------------------------------------------------------|--------------------------------------------------------------------------------------------------------------------------------------------------------------------------------|
| Structure          |                                                                                                                                                    |                                                                                                                                                    |                                                                                                                                                                                |
| Actual Endpoint    | Irritant                                                                                                                                           | Irritant                                                                                                                                           | Irritant                                                                                                                                                                       |
| Predicted Endpoint | Non-Irritant                                                                                                                                       | Irritant                                                                                                                                           | Irritant                                                                                                                                                                       |
| Distance           | 0.847                                                                                                                                              | 0.949                                                                                                                                              | 0.954                                                                                                                                                                          |
| Reference          | 85JCAE "Prehled Prumyslove Toxikologie; Organické Latky," Marhold, J., Prague, Czechoslovakia, Avicenum, 1986 Volume(issue)/page/year: -,1330,1986 | 85JCAE "Prehled Prumyslove Toxikologie; Organické Latky," Marhold, J., Prague, Czechoslovakia, Avicenum, 1986 Volume(issue)/page/year: -,1062,1986 | NTIS** National Technical Information Service. (Springfield, VA 22161) Formerly U.S. Clearinghouse for Scientific & Technical Information. Volume(issue)/page/year: OTS0534823 |

## Model Applicability

Unknown features are fingerprint features in the query molecule, but not found or appearing too infrequently in the training set.

1. All properties and OPS components are within expected ranges.

## Feature Contribution

### Top features for positive contribution

| Fingerprint | Bit/Smiles | Feature Structure | Score | Irritant in training set |
|-------------|------------|-------------------|-------|--------------------------|
|-------------|------------|-------------------|-------|--------------------------|

|                                        |             |                                                                                                                                        |        |                          |
|----------------------------------------|-------------|----------------------------------------------------------------------------------------------------------------------------------------|--------|--------------------------|
| FCFP_12                                | 5           | 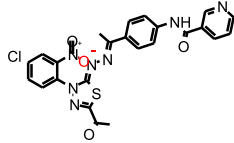<br>[*][O-]                                         | 0.0854 | 27 out of 27             |
| FCFP_12                                | 8           | <br>[*][N+](=[*])[*]                                | 0.0843 | 20 out of 20             |
| FCFP_12                                | -1986158408 | <br>[*]N=C1/S[*]=[*]N1[<br>1]                       | 0.0821 | 13 out of 13             |
| Top Features for negative contribution |             |                                                                                                                                        |        |                          |
| Fingerprint                            | Bit/Smiles  | Feature Structure                                                                                                                      | Score  | Irritant in training set |
| FCFP_12                                | -1838187238 | <br>[*]C(=[*])N[c]1:[cH]:<br>[cH]:[*]:[cH]:[cH]:1 | -0.692 | 5 out of 12              |
| FCFP_12                                | 1294255210  | <br>[*]C(=[*])N[c](:[*]):<br>[*]                  | -0.486 | 12 out of 22             |
|                                        |             |                                                                                                                                        |        |                          |



|         |            |                                                                                                                                        |        |              |
|---------|------------|----------------------------------------------------------------------------------------------------------------------------------------|--------|--------------|
| FCFP_12 | -773983804 | 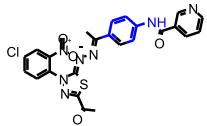 <p>[*]N[c]1:[cH]:[*]:[c]<br/>([*]):[cH]:[cH]:1</p> | -0.444 | 46 out of 79 |
|---------|------------|----------------------------------------------------------------------------------------------------------------------------------------|--------|--------------|

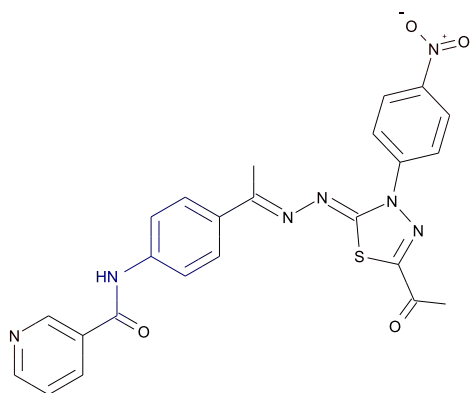

$C_{24}H_{19}N_7O_4S$

Molecular Weight: 501.51715

ALogP: 3.488

Rotatable Bonds: 7

Acceptors: 10

Donors: 1

## Model Prediction

Prediction: Non-Irritant

Probability: 0.954

Enrichment: 1.04

Bayesian Score: -1.76

Mahalanobis Distance: 11.4

Mahalanobis Distance p-value: 0.000572

Prediction: Positive if the Bayesian score is above the estimated best cutoff value from minimizing the false positive and false negative rate.

Probability: The estimated probability that the sample is in the positive category. This assumes that the Bayesian score follows a normal distribution and is different from the prediction using a cutoff.

Enrichment: An estimate of enrichment, that is, the increased likelihood (versus random) of this sample being in the category.

Bayesian Score: The standard Laplacian-modified Bayesian score.

Mahalanobis Distance: The Mahalanobis distance (MD) is the distance to the center of the training data. The larger the MD, the less trustworthy the prediction.

Mahalanobis Distance p-value: The p-value gives the fraction of training data with an MD greater than or equal to the one for the given sample, assuming normally distributed data. The smaller the p-value, the less trustworthy the prediction. For highly non-normal X properties (e.g., fingerprints), the MD p-value is wildly inaccurate.

## Structural Similar Compounds

| Name               | Benzenesulfonic acid, 2,2'-(1,4-anthraquinonylene)bis(5-methyl-4-nitrobenzenesulfonamide) disodium salt                                            | 2,2'-Stilbenedisulfonic acid, 4,4'-dinitro-                                                                                                        | 3-Picoline                                                                                                                                                                     |
|--------------------|----------------------------------------------------------------------------------------------------------------------------------------------------|----------------------------------------------------------------------------------------------------------------------------------------------------|--------------------------------------------------------------------------------------------------------------------------------------------------------------------------------|
| Structure          |                                                                                                                                                    |                                                                                                                                                    |                                                                                                                                                                                |
| Actual Endpoint    | Irritant                                                                                                                                           | Irritant                                                                                                                                           | Irritant                                                                                                                                                                       |
| Predicted Endpoint | Non-Irritant                                                                                                                                       | Irritant                                                                                                                                           | Irritant                                                                                                                                                                       |
| Distance           | 0.825                                                                                                                                              | 0.886                                                                                                                                              | 0.903                                                                                                                                                                          |
| Reference          | 85JCAE "Prehled Prumyslove Toxikologie; Organické Latky," Marhold, J., Prague, Czechoslovakia, Avicenum, 1986 Volume(issue)/page/year: -,1330,1986 | 85JCAE "Prehled Prumyslove Toxikologie; Organické Latky," Marhold, J., Prague, Czechoslovakia, Avicenum, 1986 Volume(issue)/page/year: -,1062,1986 | NTIS** National Technical Information Service. (Springfield, VA 22161) Formerly U.S. Clearinghouse for Scientific & Technical Information. Volume(issue)/page/year: OTS0534823 |

## Model Applicability

Unknown features are fingerprint features in the query molecule, but not found or appearing too infrequently in the training set.

1. All properties and OPS components are within expected ranges.

## Feature Contribution

### Top features for positive contribution

| Fingerprint | Bit/Smiles | Feature Structure | Score | Irritant in training set |
|-------------|------------|-------------------|-------|--------------------------|
|-------------|------------|-------------------|-------|--------------------------|

|                                        |             |                                                                                                                                       |        |                          |
|----------------------------------------|-------------|---------------------------------------------------------------------------------------------------------------------------------------|--------|--------------------------|
| FCFP_12                                | 5           | 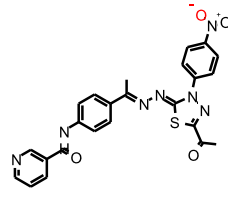<br>[*][O-]                                        | 0.0854 | 27 out of 27             |
| FCFP_12                                | 8           | <br>[*][N+](=[*])[*]                               | 0.0843 | 20 out of 20             |
| FCFP_12                                | -1986158408 | <br>[*]N=C\1/S[*]=[*]N1[<br>1]                     | 0.0821 | 13 out of 13             |
| Top Features for negative contribution |             |                                                                                                                                       |        |                          |
| Fingerprint                            | Bit/Smiles  | Feature Structure                                                                                                                     | Score  | Irritant in training set |
| FCFP_12                                | -1838187238 | <br>[*]C(=[*])N[c]1:[cH]:<br>[cH]:[*]:[cH]:[cH]:1 | -0.692 | 5 out of 12              |
| FCFP_12                                | 1294255210  | <br>[*]C(=[*])N[c](:[*]):<br>[*]                 | -0.486 | 12 out of 22             |

|         |            |                                                                                                                                           |        |              |
|---------|------------|-------------------------------------------------------------------------------------------------------------------------------------------|--------|--------------|
| FCFP_12 | -773983804 | 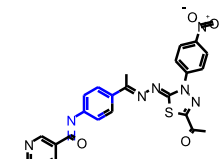 <p> [*]N[c]1:[cH]:[*]:[c]<br/> ([*]):[cH]:[cH]:1 </p> | -0.444 | 46 out of 79 |
|---------|------------|-------------------------------------------------------------------------------------------------------------------------------------------|--------|--------------|

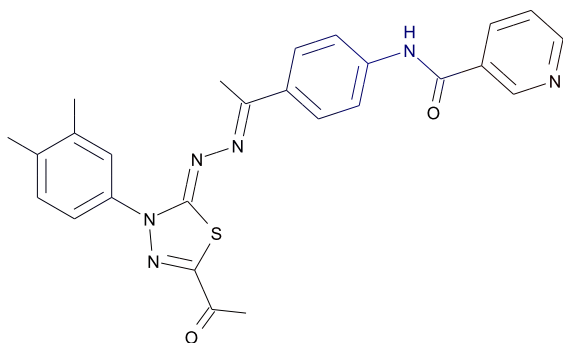

$C_{26}H_{24}N_6O_2S$

Molecular Weight: 484.57275

ALogP: 4.566

Rotatable Bonds: 6

Acceptors: 8

Donors: 1

## Model Prediction

Prediction: Non-Irritant

Probability: 0.917

Enrichment: 0.996

Bayesian Score: -2.54

Mahalanobis Distance: 10.5

Mahalanobis Distance p-value: 0.015

Prediction: Positive if the Bayesian score is above the estimated best cutoff value from minimizing the false positive and false negative rate.

Probability: The estimated probability that the sample is in the positive category. This assumes that the Bayesian score follows a normal distribution and is different from the prediction using a cutoff.

Enrichment: An estimate of enrichment, that is, the increased likelihood (versus random) of this sample being in the category.

Bayesian Score: The standard Laplacian-modified Bayesian score.

Mahalanobis Distance: The Mahalanobis distance (MD) is the distance to the center of the training data. The larger the MD, the less trustworthy the prediction.

Mahalanobis Distance p-value: The p-value gives the fraction of training data with an MD greater than or equal to the one for the given sample, assuming normally distributed data. The smaller the p-value, the less trustworthy the prediction. For highly non-normal X properties (e.g., fingerprints), the MD p-value is wildly inaccurate.

## Structural Similar Compounds

| Name               | Pregna-1,4-diene-3,20-dione, 21-(acetyloxy)-11-hydroxy-6-methyl-17- (1-oxopropoxy)-, (6- $\alpha$ ,11- $\beta$ )-                                                                | Benzenesulfonic acid, 2,2'-(4,4'-biphenylylenedivinylene)d i-, disodium salt                              | 2-Anthracenesulfonic acid, 1-amino-9,10-dihydro-9,10-dioxo-4-(2,4,6-trimethylanilino)-, monosodium salt                                            |
|--------------------|----------------------------------------------------------------------------------------------------------------------------------------------------------------------------------|-----------------------------------------------------------------------------------------------------------|----------------------------------------------------------------------------------------------------------------------------------------------------|
| Structure          |                                                                                                                                                                                  |                                                                                                           |                                                                                                                                                    |
| Actual Endpoint    | Irritant                                                                                                                                                                         | Irritant                                                                                                  | Irritant                                                                                                                                           |
| Predicted Endpoint | Irritant                                                                                                                                                                         | Non-Irritant                                                                                              | Non-Irritant                                                                                                                                       |
| Distance           | 0.774                                                                                                                                                                            | 0.796                                                                                                     | 0.850                                                                                                                                              |
| Reference          | YACHDS Yakuri to Chiryo. Pharmacology and Therapeutics. (Raifu Saiensu Shup pan K.K., 2-5-13, Yaesu, Chuo-ku, Tokyo 104, Japan) V.1-1972- Volume(issue) /page/year: 19,3103,1991 | MVCRB3 MVC-Report. (Stockholm, Sweden) No.1-2, 1972-73. Discontinued. Volume(issue)/page/year: 2,193,1973 | 85JCAE "Prehled Prumyslove Toxikologie; Organické Latky," Marhold, J., Prague, Czechoslovakia, Avicenum, 1986 Volume(issue)/page/year: -,1327,1986 |

## Model Applicability

Unknown features are fingerprint features in the query molecule, but not found or appearing too infrequently in the training set.

1. All properties and OPS components are within expected ranges.

## Feature Contribution

| Top features for positive contribution |            |                   |       |                          |
|----------------------------------------|------------|-------------------|-------|--------------------------|
| Fingerprint                            | Bit/Smiles | Feature Structure | Score | Irritant in training set |
|                                        |            |                   |       |                          |

|                                        |             |                                                                                                                                                     |        |                          |
|----------------------------------------|-------------|-----------------------------------------------------------------------------------------------------------------------------------------------------|--------|--------------------------|
| FCFP_12                                | -1986158408 | 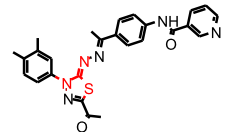<br><chem>[*]N=C1/S[*]=[*]N1[<br/>*]</chem>                      | 0.0821 | 13 out of 13             |
| FCFP_12                                | -124655670  | <br><chem>[*][c](:[*]):[cH]:n:[<br/>*]</chem>                    | 0.0821 | 13 out of 13             |
| FCFP_12                                | -1695756380 | <br><chem>[*]1:[cH]:[cH]:[cH]:n<br/>:[cH]:1</chem>               | 0.0772 | 7 out of 7               |
| Top Features for negative contribution |             |                                                                                                                                                     |        |                          |
| Fingerprint                            | Bit/Smiles  | Feature Structure                                                                                                                                   | Score  | Irritant in training set |
| FCFP_12                                | -1838187238 | <br><chem>[*]C(=[*])N[c]1:[cH]:<br/>[cH]:[*]:[cH]:[cH]:1</chem> | -0.692 | 5 out of 12              |
| FCFP_12                                | 1294255210  | <br><chem>[*]C(=[*])N[c](:[*]):<br/>[*]</chem>                 | -0.486 | 12 out of 22             |



# Sorafenib

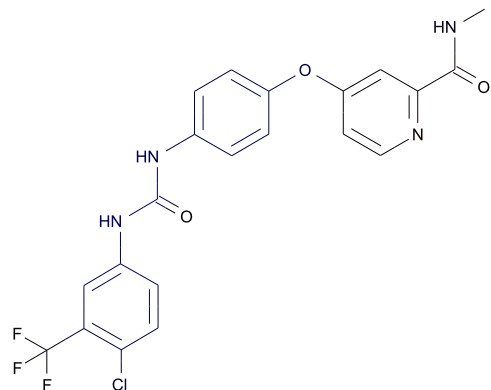

$C_{21}H_{16}ClF_3N_4O_3$

Molecular Weight: 464.82494

ALogP: 4.175

Rotatable Bonds: 6

Acceptors: 4

Donors: 3

## Model Prediction

Prediction: Non-Irritant

Probability: 0.264

Enrichment: 0.287

Bayesian Score: -5.23

Mahalanobis Distance: 8.27

Mahalanobis Distance p-value: 0.791

Prediction: Positive if the Bayesian score is above the estimated best cutoff value from minimizing the false positive and false negative rate.

Probability: The estimated probability that the sample is in the positive category. This assumes that the Bayesian score follows a normal distribution and is different from the prediction using a cutoff.

Enrichment: An estimate of enrichment, that is, the increased likelihood (versus random) of this sample being in the category.

Bayesian Score: The standard Laplacian-modified Bayesian score.

Mahalanobis Distance: The Mahalanobis distance (MD) is the distance to the center of the training data. The larger the MD, the less trustworthy the prediction.

Mahalanobis Distance p-value: The p-value gives the fraction of training data with an MD greater than or equal to the one for the given sample, assuming normally distributed data. The smaller the p-value, the less trustworthy the prediction. For highly non-normal X properties (e.g., fingerprints), the MD p-value is wildly inaccurate.

# TOPKAT\_Skin\_Irritancy\_None\_vs\_Irritant

## Structural Similar Compounds

| Name               | 5-Norbornene-2,3-dicarboxylic acid, 1,4,5,6,7,7-hexachloro-                                                                                          | Benzenesulfonic acid, 2,2'-(4,4'-biphenylylene)di-, disodium salt                                         | Sulfide, bis(4-t-butyl-m-cresyl)-                                                                                                                                              |
|--------------------|------------------------------------------------------------------------------------------------------------------------------------------------------|-----------------------------------------------------------------------------------------------------------|--------------------------------------------------------------------------------------------------------------------------------------------------------------------------------|
| Structure          |                                                                                                                                                      |                                                                                                           |                                                                                                                                                                                |
| Actual Endpoint    | Irritant                                                                                                                                             | Irritant                                                                                                  | Irritant                                                                                                                                                                       |
| Predicted Endpoint | Irritant                                                                                                                                             | Non-Irritant                                                                                              | Irritant                                                                                                                                                                       |
| Distance           | 0.844                                                                                                                                                | 0.871                                                                                                     | 0.884                                                                                                                                                                          |
| Reference          | 85JCAE "Prehled Prumyslove Toxikologie; Organické Latky," Marhold, J., Prague, Czechoslovakia, Avicenum, 1986<br>Volume(issue)/page/year: -,581,1986 | MVCRB3 MVC-Report. (Stockholm, Sweden) No.1-2, 1972-73. Discontinued. Volume(issue)/page/year: 2,193,1973 | AMIHBC AMA Archives of Industrial Hygiene and Occupational Medicine. (Chicago, IL) V.2-10, 1950-54. For publisher information, see AEHLAU. Volume(issue)/page/year: 5,311,1952 |

## Model Applicability

Unknown features are fingerprint features in the query molecule, but not found or appearing too infrequently in the training set.

1. All properties and OPS components are within expected ranges.

## Feature Contribution

### Top features for positive contribution

| Fingerprint | Bit/Smiles | Feature Structure | Score | Irritant in training set |
|-------------|------------|-------------------|-------|--------------------------|
|-------------|------------|-------------------|-------|--------------------------|



|                                        |             |                                                                                                                                                      |        |                          |
|----------------------------------------|-------------|------------------------------------------------------------------------------------------------------------------------------------------------------|--------|--------------------------|
| FCFP_12                                | -124655670  | 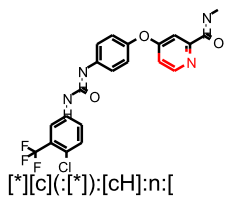<br><chem>[*][c](:[*]):[cH]:n:[*]</chem>                          | 0.0821 | 13 out of 13             |
| FCFP_12                                | -1539132615 | <br><chem>[*]C(=[*])[c](:[cH]:[*]):n:[*]</chem>                   | 0.0795 | 9 out of 9               |
| FCFP_12                                | -1695756380 | <br><chem>[*]1:[cH]:[cH]:[cH]:n:[cH]:1</chem>                     | 0.0772 | 7 out of 7               |
| Top Features for negative contribution |             |                                                                                                                                                      |        |                          |
| Fingerprint                            | Bit/Smiles  | Feature Structure                                                                                                                                    | Score  | Irritant in training set |
| FCFP_12                                | -789307649  | <br><chem>[*]O[c]1:[cH]:[cH]:[c](NC(=[*])[*]):[cH]:[cH]:1</chem> | -1.54  | 0 out of 4               |
| FCFP_12                                | -1838187238 | <br><chem>[*]C(=[*])N[c]1:[cH]:[cH]:[*]:[cH]:[cH]:1</chem>      | -0.692 | 5 out of 12              |

|         |            |                                                                                                                                               |        |              |
|---------|------------|-----------------------------------------------------------------------------------------------------------------------------------------------|--------|--------------|
| FCFP_12 | 1294255210 | 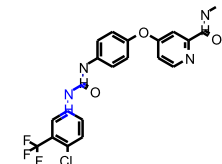<br><chem>[*]C(=[*])N[c](:[*]):</chem><br><chem>[*]</chem> | -0.486 | 12 out of 22 |
|---------|------------|-----------------------------------------------------------------------------------------------------------------------------------------------|--------|--------------|

7a

## TOPKAT\_Carcinogenic\_Potency\_TD50\_Mouse

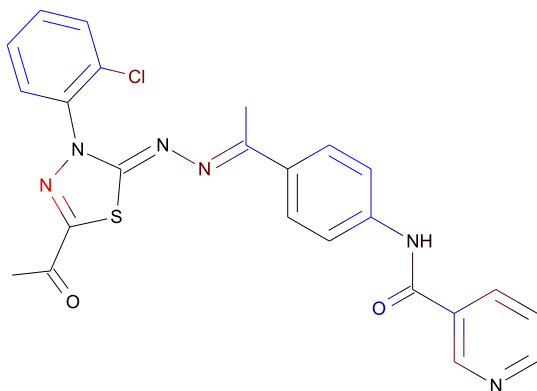C<sub>24</sub>H<sub>19</sub>ClN<sub>6</sub>O<sub>2</sub>S

Molecular Weight: 490.96466

ALogP: 4.258

Rotatable Bonds: 6

Acceptors: 8

Donors: 1

**Model Prediction**

Prediction: 11

Unit: mg/kg\_body\_weight/day

Mahalanobis Distance: 13.9

Mahalanobis Distance p-value: 5.16e-010

Mahalanobis Distance: The Mahalanobis distance (MD) is a generalization of the Euclidean distance that accounts for correlations among the X properties. It is calculated as the distance to the center of the training data. The larger the MD, the less trustworthy the prediction.

Mahalanobis Distance p-value: The p-value gives the fraction of training data with an MD greater than or equal to the one for the given sample, assuming normally distributed data. The smaller the p-value, the less trustworthy the prediction. For highly non-normal X properties (e.g., fingerprints), the MD p-value is wildly inaccurate.

**Structural Similar Compounds**

| Name                        | 470     | Ochratoxin A | 542     |
|-----------------------------|---------|--------------|---------|
| Structure                   |         |              |         |
| Actual Endpoint (-log C)    | 4.62839 | 4.79932      | 4.79932 |
| Predicted Endpoint (-log C) | 3.93264 | 3.6353       | 3.6353  |
| Distance                    | 0.805   | 0.825        | 0.825   |
| Reference                   | CPDB    | CPDB         | CPDB    |

**Model Applicability**

Unknown features are fingerprint features in the query molecule, but not found or appearing too infrequently in the training set.

1. All properties and OPS components are within expected ranges.
2. Unknown ECFP\_2 feature: 128986386: [\*]N=C(/C)\[c](:[\*]):[\*]
3. Unknown ECFP\_2 feature: 562081661: [\*]C(=NN=[\*])[\*]
4. Unknown ECFP\_2 feature: -819426257: [\*]C(=NN=[\*])[\*]
5. Unknown ECFP\_2 feature: 189949281: [\*]N=C\1/S[\*]=[\*]N1[\*]
6. Unknown ECFP\_2 feature: -1110911409: [\*]=C1[\*][\*]=NN1[c](:[\*]):[\*]
7. Unknown ECFP\_2 feature: -934225701: [\*]C(=[\*])C1=N[\*][\*]S1
8. Unknown ECFP\_2 feature: -1236953626: [\*]N([\*])[c](:[cH]):[\*]:[c]([\*]):[\*]

**Feature Contribution****Top features for positive contribution**

| Fingerprint | Bit/Smiles | Feature Structure | Score |
|-------------|------------|-------------------|-------|
|             |            |                   |       |

| ECFP_6                                 | 655739385  | 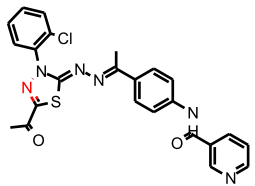<br><chem>[*]N=[*]</chem>                               | 0.229  |
|----------------------------------------|------------|--------------------------------------------------------------------------------------------------------------------------------------------|--------|
| ECFP_6                                 | -817402818 | <br><chem>[*]Cl</chem>                                  | 0.129  |
| ECFP_6                                 | -175146122 | <br><chem>[*]C(=[*])[c](:[cH]:[<br/>*]):[cH]:[*]</chem> | 0.107  |
| Top Features for negative contribution |            |                                                                                                                                            |        |
| Fingerprint                            | Bit/Smiles | Feature Structure                                                                                                                          | Score  |
| ECFP_6                                 | 1996767644 | <br><chem>[*][c](:[*]):[cH]:[cH]<br/>]:[*]</chem>     | -0.251 |
| ECFP_6                                 | 642810091  | <br><chem>[*][c](:[*]):[*]</chem>                     | -0.247 |

|        |            |                                                                                                                  |        |
|--------|------------|------------------------------------------------------------------------------------------------------------------|--------|
| ECFP_6 | -182236392 | 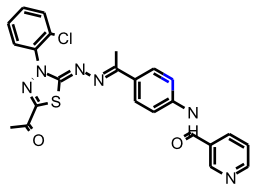<br><chem>[*]:[cH]:[*]</chem> | -0.232 |
|--------|------------|------------------------------------------------------------------------------------------------------------------|--------|

7b

## TOPKAT\_Carcinogenic\_Potency\_TD50\_Mouse

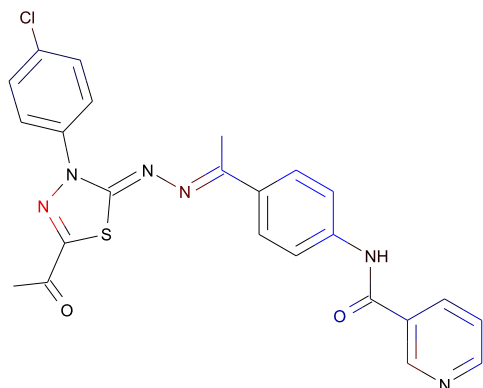C<sub>24</sub>H<sub>19</sub>ClN<sub>6</sub>O<sub>2</sub>S

Molecular Weight: 490.96465

ALogP: 4.258

Rotatable Bonds: 6

Acceptors: 8

Donors: 1

**Model Prediction**

Prediction: 8.97

Unit: mg/kg\_body\_weight/day

Mahalanobis Distance: 14

Mahalanobis Distance p-value: 3.32e-010

Mahalanobis Distance: The Mahalanobis distance (MD) is a generalization of the Euclidean distance that accounts for correlations among the X properties. It is calculated as the distance to the center of the training data. The larger the MD, the less trustworthy the prediction.

Mahalanobis Distance p-value: The p-value gives the fraction of training data with an MD greater than or equal to the one for the given sample, assuming normally distributed data. The smaller the p-value, the less trustworthy the prediction. For highly non-normal X properties (e.g., fingerprints), the MD p-value is wildly inaccurate.

**Structural Similar Compounds**

| Name                        | 470     | 223     | Ochratoxin A |
|-----------------------------|---------|---------|--------------|
| Structure                   |         |         |              |
| Actual Endpoint (-log C)    | 4.62839 | 5.08368 | 4.79932      |
| Predicted Endpoint (-log C) | 3.93264 | 5.08273 | 3.6353       |
| Distance                    | 0.804   | 0.829   | 0.832        |
| Reference                   | CPDB    | CPDB    | CPDB         |

**Model Applicability**

Unknown features are fingerprint features in the query molecule, but not found or appearing too infrequently in the training set.

1. OPS PC20 out of range. Value: 3.6093. Training min, max, SD, explained variance: -4.3384, 3.4394, 1.14, 0.0162.
2. Unknown ECFP\_2 feature: 128986386: [\*]\N=C(/C)\[c](:[\*]):[\*]
3. Unknown ECFP\_2 feature: 562081661: [\*]C(=NN=[\*])[\*]
4. Unknown ECFP\_2 feature: -819426257: [\*]C(=NN=[\*])[\*]
5. Unknown ECFP\_2 feature: 189949281: [\*]\N=C\1/S[\*]=[\*]N1[\*]
6. Unknown ECFP\_2 feature: -1110911409: [\*]=C1[\*][\*]=NN1[c](:[\*]):[\*]
7. Unknown ECFP\_2 feature: -934225701: [\*]C(=[\*])C1=N[\*][\*]S1

**Feature Contribution****Top features for positive contribution**

| Fingerprint | Bit/Smiles | Feature Structure | Score |
|-------------|------------|-------------------|-------|
|             |            |                   |       |

|                                        |            |                                                                                                                          |        |
|----------------------------------------|------------|--------------------------------------------------------------------------------------------------------------------------|--------|
| ECFP_6                                 | 655739385  | 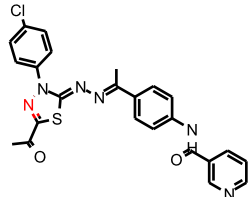<br>[*]N=[*]                          | 0.229  |
| ECFP_6                                 | -817402818 | <br>[*]Cl                             | 0.129  |
| ECFP_6                                 | -175146122 | <br>[*]C(=[*])[c](:[cH]:[*]):[cH]:[*] | 0.107  |
| Top Features for negative contribution |            |                                                                                                                          |        |
| Fingerprint                            | Bit/Smiles | Feature Structure                                                                                                        | Score  |
| ECFP_6                                 | 1996767644 | <br>[*][c](:[*]):[cH]:[cH]:[*]      | -0.251 |
| ECFP_6                                 | 642810091  | <br>[*][c](:[*]):[*]                | -0.247 |

|        |            |                                                                                                                                                                                                                                                                                                        |        |
|--------|------------|--------------------------------------------------------------------------------------------------------------------------------------------------------------------------------------------------------------------------------------------------------------------------------------------------------|--------|
| ECFP_6 | -182236392 | 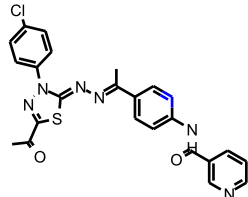 <p>Chemical structure showing a chlorophenyl group connected to a thiazole ring, which is further connected to a pyridine ring and a pyrimidine ring. The structure is labeled with <chem>[*]:[cH]:[*]</chem>.</p> | -0.232 |
|--------|------------|--------------------------------------------------------------------------------------------------------------------------------------------------------------------------------------------------------------------------------------------------------------------------------------------------------|--------|



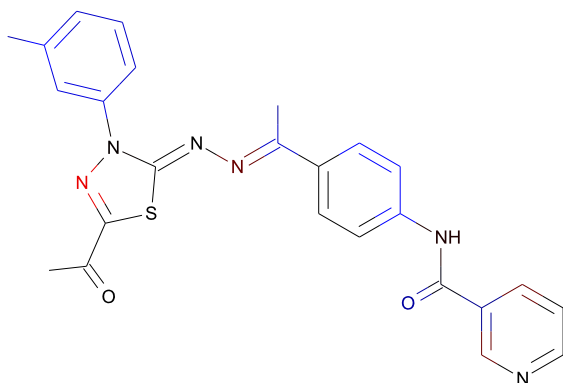

$C_{25}H_{22}N_6O_2S$

Molecular Weight: 470.54617

ALogP: 4.08

Rotatable Bonds: 6

Acceptors: 8

Donors: 1

## Model Prediction

Prediction: 27.6

Unit: mg/kg\_body\_weight/day

Mahalanobis Distance: 13.6

Mahalanobis Distance p-value: 4.29e-009

Mahalanobis Distance: The Mahalanobis distance (MD) is a generalization of the Euclidean distance that accounts for correlations among the X properties. It is calculated as the distance to the center of the training data. The larger the MD, the less trustworthy the prediction.

Mahalanobis Distance p-value: The p-value gives the fraction of training data with an MD greater than or equal to the one for the given sample, assuming normally distributed data. The smaller the p-value, the less trustworthy the prediction. For highly non-normal X properties (e.g., fingerprints), the MD p-value is wildly inaccurate.

## Structural Similar Compounds

| Name                        | 470     | 646      | Ochratoxin A |
|-----------------------------|---------|----------|--------------|
| Structure                   |         |          |              |
| Actual Endpoint (-log C)    | 4.62839 | 0.937339 | 4.79932      |
| Predicted Endpoint (-log C) | 3.93264 | 3.26294  | 3.6353       |
| Distance                    | 0.788   | 0.817    | 0.828        |
| Reference                   | CPDB    | CPDB     | CPDB         |

## Model Applicability

Unknown features are fingerprint features in the query molecule, but not found or appearing too infrequently in the training set.

1. All properties and OPS components are within expected ranges.
2. Unknown ECFP\_2 feature: 128986386: [\*]\N=C(/C)\[c](:[\*]):[\*]
3. Unknown ECFP\_2 feature: 562081661: [\*]C(=NN=[\*])[\*]
4. Unknown ECFP\_2 feature: -819426257: [\*]C(=NN=[\*])[\*]
5. Unknown ECFP\_2 feature: 189949281: [\*]\N=C\1/S[\*]=[\*]N1[\*]
6. Unknown ECFP\_2 feature: -1110911409: [\*]=C1[\*][\*]=NN1[c](:[\*]):[\*]
7. Unknown ECFP\_2 feature: -934225701: [\*]C(=[\*])C1=N[\*][\*]S1

## Feature Contribution

### Top features for positive contribution

| Fingerprint | Bit/Smiles | Feature Structure | Score |
|-------------|------------|-------------------|-------|
|             |            |                   |       |

|                                        |             |                                                                                                                          |        |
|----------------------------------------|-------------|--------------------------------------------------------------------------------------------------------------------------|--------|
| ECFP_6                                 | 655739385   | 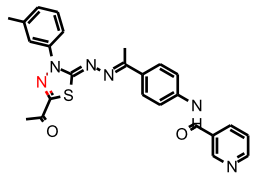<br>[*]N=[*]                          | 0.229  |
| ECFP_6                                 | -175146122  | <br>[*]C(=[*])[c](:[cH]:[*]):[cH]:[*] | 0.107  |
| ECFP_6                                 | -1087070950 | <br>[*]N=[*]                          | 0.104  |
| Top Features for negative contribution |             |                                                                                                                          |        |
| Fingerprint                            | Bit/Smiles  | Feature Structure                                                                                                        | Score  |
| ECFP_6                                 | 1996767644  | <br>[*][c](:[*]):[cH]:[cH]:[*]      | -0.251 |
| ECFP_6                                 | 642810091   | <br>[*][c](:[*]):[*]                | -0.247 |

|        |            |                                                                                                                                                                                                                                                                     |        |
|--------|------------|---------------------------------------------------------------------------------------------------------------------------------------------------------------------------------------------------------------------------------------------------------------------|--------|
| ECFP_6 | -182236392 | 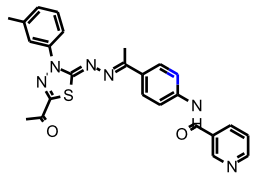 <p>Chemical structure of a molecule featuring a thiazolidine ring system connected via a diazo group to a pyridine ring, which is further substituted with a pyridine ring.</p> | -0.232 |
|--------|------------|---------------------------------------------------------------------------------------------------------------------------------------------------------------------------------------------------------------------------------------------------------------------|--------|

[\*]:[cH]:[\*]

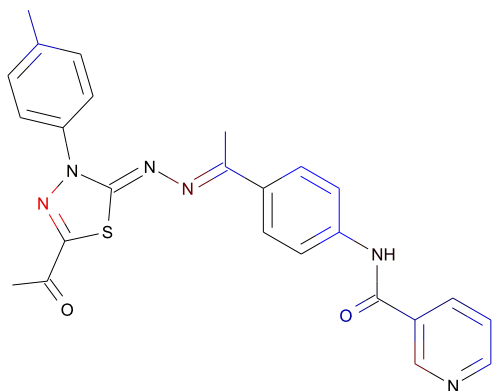

$C_{25}H_{22}N_6O_2S$

Molecular Weight: 470.54617

ALogP: 4.08

Rotatable Bonds: 6

Acceptors: 8

Donors: 1

## Model Prediction

Prediction: 16.8

Unit: mg/kg\_body\_weight/day

Mahalanobis Distance: 13.1

Mahalanobis Distance p-value: 6.91e-008

Mahalanobis Distance: The Mahalanobis distance (MD) is a generalization of the Euclidean distance that accounts for correlations among the X properties. It is calculated as the distance to the center of the training data. The larger the MD, the less trustworthy the prediction.

Mahalanobis Distance p-value: The p-value gives the fraction of training data with an MD greater than or equal to the one for the given sample, assuming normally distributed data. The smaller the p-value, the less trustworthy the prediction. For highly non-normal X properties (e.g., fingerprints), the MD p-value is wildly inaccurate.

## Structural Similar Compounds

| Name                        | 470     | 646      | Ochratoxin A |
|-----------------------------|---------|----------|--------------|
| Structure                   |         |          |              |
| Actual Endpoint (-log C)    | 4.62839 | 0.937339 | 4.79932      |
| Predicted Endpoint (-log C) | 3.93264 | 3.26294  | 3.6353       |
| Distance                    | 0.787   | 0.820    | 0.831        |
| Reference                   | CPDB    | CPDB     | CPDB         |

## Model Applicability

Unknown features are fingerprint features in the query molecule, but not found or appearing too infrequently in the training set.

1. All properties and OPS components are within expected ranges.
2. Unknown ECFP\_2 feature: 128986386: [\*]\N=C(/C)\[c](:[\*]):[\*]
3. Unknown ECFP\_2 feature: 562081661: [\*]C(=NN=[\*])[\*]
4. Unknown ECFP\_2 feature: -819426257: [\*]C(=NN=[\*])[\*]
5. Unknown ECFP\_2 feature: 189949281: [\*]\N=C\1/S[\*]=[\*]N1[\*]
6. Unknown ECFP\_2 feature: -1110911409: [\*]=C1[\*][\*]=NN1[c](:[\*]):[\*]
7. Unknown ECFP\_2 feature: -934225701: [\*]C(=[\*])C1=N[\*][\*]S1

## Feature Contribution

### Top features for positive contribution

| Fingerprint | Bit/Smiles | Feature Structure | Score |
|-------------|------------|-------------------|-------|
|             |            |                   |       |

| ECFP_6                                 | 655739385   | 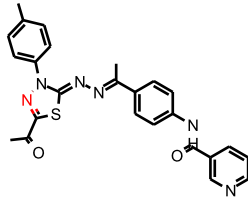<br><chem>[*]N=[*]</chem>                          | 0.229  |
|----------------------------------------|-------------|---------------------------------------------------------------------------------------------------------------------------------------|--------|
| ECFP_6                                 | -175146122  | <br><chem>[*]C(=[*])[c](:[cH]:[*]):[cH]:[*]</chem> | 0.107  |
| ECFP_6                                 | -1087070950 | <br><chem>[*]N=[*]</chem>                          | 0.104  |
| Top Features for negative contribution |             |                                                                                                                                       |        |
| Fingerprint                            | Bit/Smiles  | Feature Structure                                                                                                                     | Score  |
| ECFP_6                                 | 1996767644  | <br><chem>[*][c](:[*]):[cH]:[cH]:[*]</chem>      | -0.251 |
| ECFP_6                                 | 642810091   | <br><chem>[*][c](:[*]):[*]</chem>                | -0.247 |

|        |            |                                                                                                                                                                                        |        |
|--------|------------|----------------------------------------------------------------------------------------------------------------------------------------------------------------------------------------|--------|
| ECFP_6 | -182236392 | 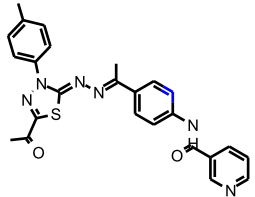<br><chem>Cc1ccc(cc1)N1N=C(S1C(=O)C)N=N/C=C/c2ccc(cc2)N3C(=O)C4=CC=CC=N4C3=O</chem><br>[*]:[cH]:[*] | -0.232 |
|--------|------------|----------------------------------------------------------------------------------------------------------------------------------------------------------------------------------------|--------|

**7e**

## TOPKAT\_Carcinogenic\_Potency\_TD50\_Mouse

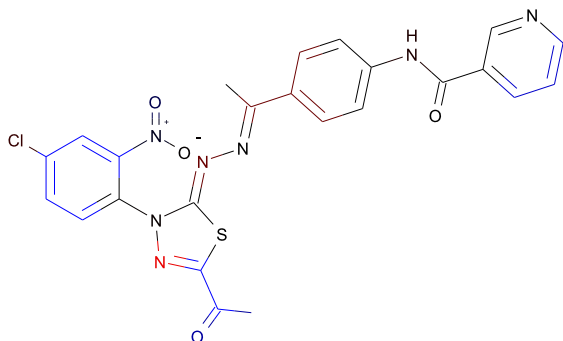
$$\text{C}_{24}\text{H}_{18}\text{ClN}_7\text{O}_4\text{S}$$

Molecular Weight: 535.96222

|ALogP: 4.153

Rotatable Bonds: 7

Acceptors: 10

Donors: 1

## Model Prediction

Prediction: 15.8

Unit: mg/kg\_body\_weight/day

Mahalanobis Distance: 15.4

Mahalanobis Distance p-value: 2.64e-014

**Mahalanobis Distance:** The Mahalanobis distance (MD) is a generalization of the Euclidean distance that accounts for correlations among the X properties. It is calculated as the distance to the center of the training data. The larger the MD, the less trustworthy the prediction.

Mahalanobis Distance p-value: The p-value gives the fraction of training data with an MD greater than or equal to the one for the given sample, assuming normally distributed data. The smaller the p-value, the less trustworthy the prediction. For highly non-normal X properties (e.g., fingerprints), the MD p-value is wildly inaccurate.

## Structural Similar Compounds

| Name                        | 420                                                                                 | 223                                                                                 | Salicylazosulfapyridine                                                             |
|-----------------------------|-------------------------------------------------------------------------------------|-------------------------------------------------------------------------------------|-------------------------------------------------------------------------------------|
| Structure                   | 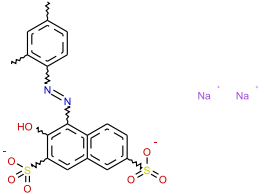 |  |  |
| Actual Endpoint (-log C)    | 2.78302                                                                             | 5.08368                                                                             | 2.5034                                                                              |
| Predicted Endpoint (-log C) | 3.31546                                                                             | 5.08273                                                                             | 3.54214                                                                             |
| Distance                    | 0.856                                                                               | 0.857                                                                               | 0.870                                                                               |
| Reference                   | CPDB                                                                                | CPDB                                                                                | CPDB                                                                                |

## Model Applicability

Unknown features are fingerprint features in the query molecule, but not found or appearing too infrequently in the training set.

1. All properties and OPS components are within expected ranges.
2. Unknown ECFP\_2 feature: -934225701: [\*]C(=[\*])C1=N[\*])([\*])S1
3. Unknown ECFP\_2 feature: -1110911409: [\*]=C1[\*](\*)=NN1[c](:[\*]):[\*]
4. Unknown ECFP\_2 feature: 189949281: [\*]N=C\1/S[\*]=[\*]N1[\*]
5. Unknown ECFP\_2 feature: -1236953626: [\*]N([\*])[c](:[cH]:[\*]):[c]([\*]):[\*]
6. Unknown ECFP\_2 feature: -819426257: [\*]C(=NN=[\*])([\*])
7. Unknown ECFP\_2 feature: 562081661: [\*]C(=NN=[\*])([\*])
8. Unknown ECFP\_2 feature: 128986386: [\*]N=C(/C)[c](:[\*]):[\*]

## Feature Contribution

### Top features for positive contribution

| Fingerprint | Bit/Smiles | Feature Structure | Score |
|-------------|------------|-------------------|-------|
|             |            |                   |       |

|                                        |            |                                                                                                                                       |        |
|----------------------------------------|------------|---------------------------------------------------------------------------------------------------------------------------------------|--------|
| ECFP_6                                 | 655739385  | 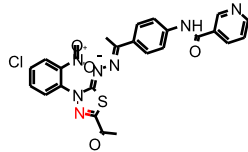<br><chem>[*]N=[*]</chem>                          | 0.229  |
| ECFP_6                                 | -817402818 | <br><chem>[*]Cl</chem>                             | 0.129  |
| ECFP_6                                 | -175146122 | <br><chem>[*]C(=[*])[c](:[cH]:[*]):[cH]:[*]</chem> | 0.107  |
| Top Features for negative contribution |            |                                                                                                                                       |        |
| Fingerprint                            | Bit/Smiles | Feature Structure                                                                                                                     | Score  |
| ECFP_6                                 | 1996767644 | <br><chem>[*][c](:[*]):[cH]:[cH]:[*]</chem>      | -0.251 |
| ECFP_6                                 | 642810091  | <br><chem>[*][c](:[*]):[*]</chem>                | -0.247 |



|        |            |                                                                                                         |        |
|--------|------------|---------------------------------------------------------------------------------------------------------|--------|
| ECFP_6 | -182236392 | 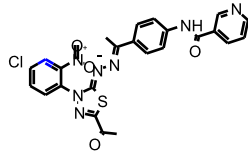 <p>[*]:[cH]:[*]</p> | -0.232 |
|--------|------------|---------------------------------------------------------------------------------------------------------|--------|

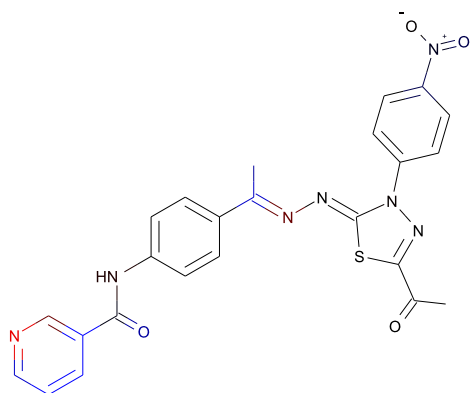

C<sub>24</sub>H<sub>19</sub>N<sub>7</sub>O<sub>4</sub>S

Molecular Weight: 501.51715

ALogP: 3.488

Rotatable Bonds: 7

Acceptors: 10

Donors: 1

## Model Prediction

Prediction: 13.9

Unit: mg/kg\_body\_weight/day

Mahalanobis Distance: 13.8

Mahalanobis Distance p-value: 1.3e-009

Mahalanobis Distance: The Mahalanobis distance (MD) is a generalization of the Euclidean distance that accounts for correlations among the X properties. It is calculated as the distance to the center of the training data. The larger the MD, the less trustworthy the prediction.

Mahalanobis Distance p-value: The p-value gives the fraction of training data with an MD greater than or equal to the one for the given sample, assuming normally distributed data. The smaller the p-value, the less trustworthy the prediction. For highly non-normal X properties (e.g., fingerprints), the MD p-value is wildly inaccurate.

## Structural Similar Compounds

| Name                        | 420     | Salicylazosulfapyridine | 470     |
|-----------------------------|---------|-------------------------|---------|
| Structure                   |         |                         |         |
| Actual Endpoint (-log C)    | 2.78302 | 2.5034                  | 4.62839 |
| Predicted Endpoint (-log C) | 3.31546 | 3.54214                 | 3.93264 |
| Distance                    | 0.813   | 0.838                   | 0.848   |
| Reference                   | CPDB    | CPDB                    | CPDB    |

## Model Applicability

Unknown features are fingerprint features in the query molecule, but not found or appearing too infrequently in the training set.

1. All properties and OPS components are within expected ranges.
2. Unknown ECFP\_2 feature: 128986386: [\*]\N=C(/C)\[c](:[\*]):[\*]
3. Unknown ECFP\_2 feature: 562081661: [\*]C(=NN=[\*])[\*]
4. Unknown ECFP\_2 feature: -819426257: [\*]C(=NN=[\*])[\*]
5. Unknown ECFP\_2 feature: 189949281: [\*]\N=C\1/S[\*]=[\*]N1[\*]
6. Unknown ECFP\_2 feature: -1110911409: [\*]=C1[\*][\*]=NN1[c](:[\*]):[\*]
7. Unknown ECFP\_2 feature: -934225701: [\*]C(=[\*])C1=N[\*][\*]S1

## Feature Contribution

### Top features for positive contribution

| Fingerprint | Bit/Smiles | Feature Structure | Score |
|-------------|------------|-------------------|-------|
|             |            |                   |       |

|                                        |             |                                                                                                                          |        |
|----------------------------------------|-------------|--------------------------------------------------------------------------------------------------------------------------|--------|
| ECFP_6                                 | 655739385   | 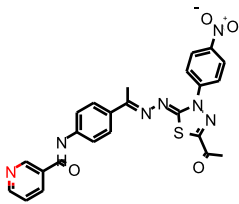<br>[*]N=[*]                          | 0.229  |
| ECFP_6                                 | -175146122  | <br>[*]C(=[*])[c](:[cH]:[*]):[cH]:[*] | 0.107  |
| ECFP_6                                 | -1087070950 | <br>[*]N=[*]                          | 0.104  |
| Top Features for negative contribution |             |                                                                                                                          |        |
| Fingerprint                            | Bit/Smiles  | Feature Structure                                                                                                        | Score  |
| ECFP_6                                 | 1996767644  | <br>[*][c](:[*]):[cH]:[cH]:[*]      | -0.251 |
| ECFP_6                                 | 642810091   | <br>[*][c](:[*]):[*]                | -0.247 |

|        |            |                                                                                                         |        |
|--------|------------|---------------------------------------------------------------------------------------------------------|--------|
| ECFP_6 | -182236392 | 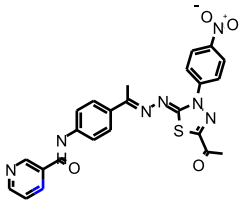 <p>[*]:[cH]:[*]</p> | -0.232 |
|--------|------------|---------------------------------------------------------------------------------------------------------|--------|

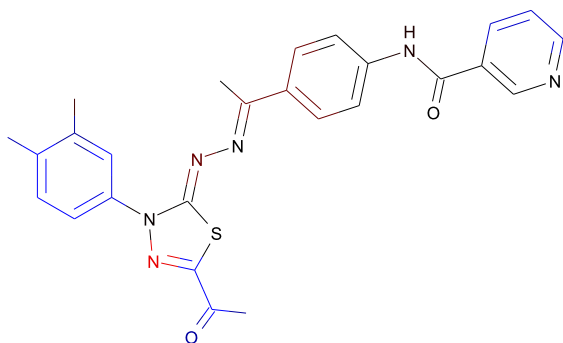

$C_{26}H_{24}N_6O_2S$

Molecular Weight: 484.57275

ALogP: 4.566

Rotatable Bonds: 6

Acceptors: 8

Donors: 1

## Model Prediction

Prediction: 20.6

Unit: mg/kg\_body\_weight/day

Mahalanobis Distance: 13.6

Mahalanobis Distance p-value: 3.88e-009

Mahalanobis Distance: The Mahalanobis distance (MD) is a generalization of the Euclidean distance that accounts for correlations among the X properties. It is calculated as the distance to the center of the training data. The larger the MD, the less trustworthy the prediction.

Mahalanobis Distance p-value: The p-value gives the fraction of training data with an MD greater than or equal to the one for the given sample, assuming normally distributed data. The smaller the p-value, the less trustworthy the prediction. For highly non-normal X properties (e.g., fingerprints), the MD p-value is wildly inaccurate.

## Structural Similar Compounds

| Name                        | 470     | 646      | 223     |
|-----------------------------|---------|----------|---------|
| Structure                   |         |          |         |
| Actual Endpoint (-log C)    | 4.62839 | 0.937339 | 5.08368 |
| Predicted Endpoint (-log C) | 3.93264 | 3.26294  | 5.08273 |
| Distance                    | 0.810   | 0.828    | 0.830   |
| Reference                   | CPDB    | CPDB     | CPDB    |

## Model Applicability

Unknown features are fingerprint features in the query molecule, but not found or appearing too infrequently in the training set.

1. All properties and OPS components are within expected ranges.
2. Unknown ECFP\_2 feature: -934225701: [\*]C(=[\*])C1=N[\*][\*]S1
3. Unknown ECFP\_2 feature: -1110911409: [\*]=C1[\*][\*]=NN1[c](:[\*]):[\*]
4. Unknown ECFP\_2 feature: 189949281: [\*]N=C\1/S[\*]=[\*]N1[\*]
5. Unknown ECFP\_2 feature: -819426257: [\*]C(=NN=[\*])[\*]
6. Unknown ECFP\_2 feature: 562081661: [\*]C(=NN=[\*])[\*]
7. Unknown ECFP\_2 feature: 128986386: [\*]N=C(/C)\[c](:[\*]):[\*]

## Feature Contribution

### Top features for positive contribution

| Fingerprint | Bit/Smiles | Feature Structure | Score |
|-------------|------------|-------------------|-------|
|             |            |                   |       |

| ECFP_6                                 | 655739385   | 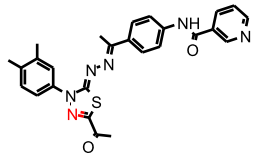<br><chem>[*]N=[*]</chem>                          | 0.229  |
|----------------------------------------|-------------|---------------------------------------------------------------------------------------------------------------------------------------|--------|
| ECFP_6                                 | -175146122  | <br><chem>[*]C(=[*])[c](:[cH]:[*]):[cH]:[*]</chem> | 0.107  |
| ECFP_6                                 | -1087070950 | <br><chem>[*]N=[*]</chem>                          | 0.104  |
| Top Features for negative contribution |             |                                                                                                                                       |        |
| Fingerprint                            | Bit/Smiles  | Feature Structure                                                                                                                     | Score  |
| ECFP_6                                 | 1996767644  | <br><chem>[*][c](:[*]):[cH]:[cH]:[*]</chem>      | -0.251 |
| ECFP_6                                 | 642810091   | <br><chem>[*][c](:[*]):[*]</chem>                | -0.247 |

|        |            |                                                                                                                                                                   |        |
|--------|------------|-------------------------------------------------------------------------------------------------------------------------------------------------------------------|--------|
| ECFP_6 | -182236392 | 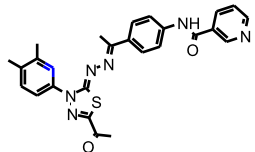<br><chem>Cc1ccc(cc1)/N=N/S(=N)C(=O)c2ccc(cc2)Nc3ccncc3</chem><br>[*]:[cH]:[*] | -0.232 |
|--------|------------|-------------------------------------------------------------------------------------------------------------------------------------------------------------------|--------|

# Sorafenib

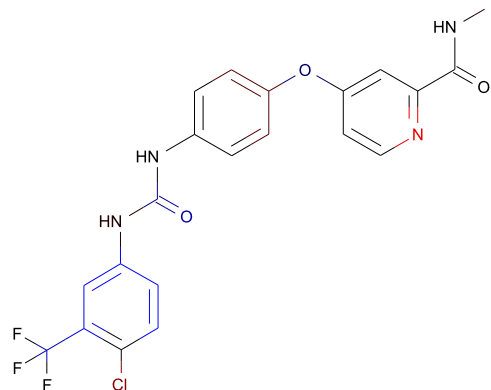

$C_{21}H_{16}ClF_3N_4O_3$

Molecular Weight: 464.82494

ALogP: 4.175

Rotatable Bonds: 6

Acceptors: 4

Donors: 3

## Model Prediction

Prediction: 19.2

Unit: mg/kg\_body\_weight/day

Mahalanobis Distance: 12.4

Mahalanobis Distance p-value: 2.94e-006

Mahalanobis Distance: The Mahalanobis distance (MD) is a generalization of the Euclidean distance that accounts for correlations among the X properties. It is calculated as the distance to the center of the training data. The larger the MD, the less trustworthy the prediction.

Mahalanobis Distance p-value: The p-value gives the fraction of training data with an MD greater than or equal to the one for the given sample, assuming normally distributed data. The smaller the p-value, the less trustworthy the prediction. For highly non-normal X properties (e.g., fingerprints), the MD p-value is wildly inaccurate.

# TOPKAT\_Carcinogenic\_Potency\_TD50\_Mouse

## Structural Similar Compounds

| Name                        | Ochratoxin A | 542     | 4-Chloro-6-(2,3-xylylidino)-2-pyridine-dithio(N-b-hydroxy-ethyl) acetamide |
|-----------------------------|--------------|---------|----------------------------------------------------------------------------|
| Structure                   |              |         |                                                                            |
| Actual Endpoint (-log C)    | 4.79932      | 4.79932 | 3.91517                                                                    |
| Predicted Endpoint (-log C) | 3.6353       | 3.6353  | 3.92186                                                                    |
| Distance                    | 0.718        | 0.718   | 0.738                                                                      |
| Reference                   | CPDB         | CPDB    | CPDB                                                                       |

## Model Applicability

Unknown features are fingerprint features in the query molecule, but not found or appearing too infrequently in the training set.

1. All properties and OPS components are within expected ranges.
2. Unknown ECFP\_2 feature: 1338334141: [\*]C(=[\*])NC
3. Unknown ECFP\_2 feature: 1413420509: [\*]C(=[\*])[c](:n:[\*]):c:[\*]

## Feature Contribution

| Top features for positive contribution |            |                   |       |
|----------------------------------------|------------|-------------------|-------|
| Fingerprint                            | Bit/Smiles | Feature Structure | Score |
| ECFP_6                                 | 655739385  |                   | 0.229 |



|                                        |            |                                                                                                                    |        |
|----------------------------------------|------------|--------------------------------------------------------------------------------------------------------------------|--------|
| ECFP_6                                 | -817402818 | 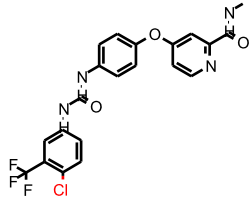<br>[*]Cl                       | 0.129  |
| ECFP_6                                 | -176455838 | <br>[*]O[c](:[cH]:[*]):[cH]:[*] | 0.0818 |
| Top Features for negative contribution |            |                                                                                                                    |        |
| Fingerprint                            | Bit/Smiles | Feature Structure                                                                                                  | Score  |
| ECFP_6                                 | 1996767644 | <br>[*][c](:[*]):[cH]:[cH]:[*]  | -0.251 |
| ECFP_6                                 | 642810091  | <br>[*][c](:[*]):[*]          | -0.247 |
| ECFP_6                                 | -182236392 | <br>[*]:[cH]:[*]              | -0.232 |



7a

TOPKAT\_Carcinogenic\_Potency\_TD50\_Rat

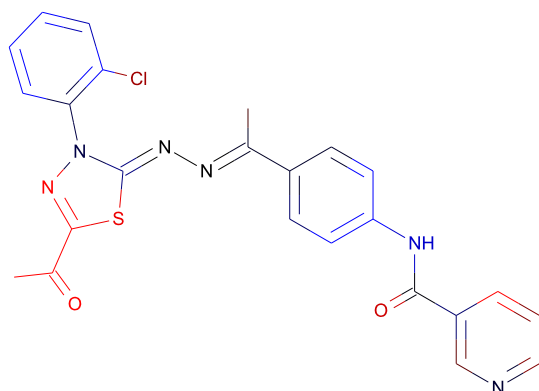C<sub>24</sub>H<sub>19</sub>ClN<sub>6</sub>O<sub>2</sub>S

Molecular Weight: 490.96466

ALogP: 4.258

Rotatable Bonds: 6

Acceptors: 8

Donors: 1

## Model Prediction

Prediction: 3.64

Unit: mg/kg\_body\_weight/day

Mahalanobis Distance: 16.9

Mahalanobis Distance p-value: 2.28e-017

Mahalanobis Distance: The Mahalanobis distance (MD) is a generalization of the Euclidean distance that accounts for correlations among the X properties. It is calculated as the distance to the center of the training data. The larger the MD, the less trustworthy the prediction.

Mahalanobis Distance p-value: The p-value gives the fraction of training data with an MD greater than or equal to the one for the given sample, assuming normally distributed data. The smaller the p-value, the less trustworthy the prediction. For highly non-normal X properties (e.g., fingerprints), the MD p-value is wildly inaccurate.

## Structural Similar Compounds

| Name                        | C.I. direct brown 95 | Omeprazole | 5,6-Dimethoxysterigmatocystin |
|-----------------------------|----------------------|------------|-------------------------------|
| Structure                   |                      |            |                               |
| Actual Endpoint (-log C)    | 5.31387              | 3.4628     | 6.02361                       |
| Predicted Endpoint (-log C) | 4.30266              | 4.7324     | 4.98771                       |
| Distance                    | 0.609                | 0.764      | 0.764                         |
| Reference                   | CPDB                 | CPDB       | CPDB                          |

## Model Applicability

Unknown features are fingerprint features in the query molecule, but not found or appearing too infrequently in the training set.

1. All properties and OPS components are within expected ranges.

## Feature Contribution

### Top features for positive contribution

| Fingerprint | Bit/Smiles | Feature Structure                        | Score |
|-------------|------------|------------------------------------------|-------|
| FCFP_6      | 565998553  | <br><chem>[*]C(=[*])C1=N[*]][*]S1</chem> | 0.357 |

|                                        |             |                                                                                                                                                |        |
|----------------------------------------|-------------|------------------------------------------------------------------------------------------------------------------------------------------------|--------|
| FCFP_6                                 | 565968762   | 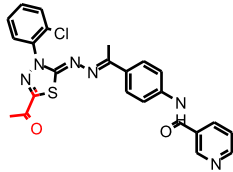<br><chem>[*]C(=[*])C(=O)C</chem>                           | 0.266  |
| FCFP_6                                 | -2090462286 | <br><chem>[*]N([*])[c]1:[cH]:[cH]:[cH]:[cH]:[c]:1[*]</chem> | 0.245  |
| Top Features for negative contribution |             |                                                                                                                                                |        |
| Fingerprint                            | Bit/Smiles  | Feature Structure                                                                                                                              | Score  |
| FCFP_6                                 | 991735244   | <br><chem>[*][c]1:[*]:[cH]:[cH]:[cH]:[cH]:1</chem>          | -0.422 |
| FCFP_6                                 | 16          | <br><chem>[*][c](:[*]):[*]</chem>                         | -0.354 |
| FCFP_6                                 | 590925877   | <br><chem>[*]N[c](:[cH]:[*]):[cH]:[*]</chem>              | -0.323 |



**7b**

## TOPKAT Carcinogenic Potency TD50 Rat

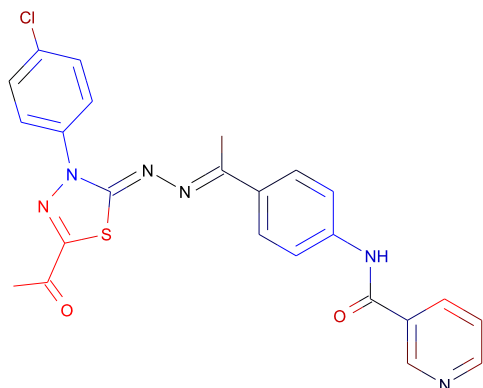
$$\text{C}_{24}\text{H}_{19}\text{ClN}_6\text{O}_2\text{S}$$

Molecular Weight: 490.96465

|ALogP: 4.258

Rotatable Bonds: 6

Acceptors: 8

Donors: 1

## Model Prediction

Prediction: 2.42

Unit: mg/kg\_body\_weight/day

Mahalanobis Distance: 15.5

Mahalanobis Distance p-value: 9.02e-013

**Mahalanobis Distance:** The Mahalanobis distance (MD) is a generalization of the Euclidean distance that accounts for correlations among the X properties. It is calculated as the distance to the center of the training data. The larger the MD, the less trustworthy the prediction.

Mahalanobis Distance p-value: The p-value gives the fraction of training data with an MD greater than or equal to the one for the given sample, assuming normally distributed data. The smaller the p-value, the less trustworthy the prediction. For highly non-normal X properties (e.g., fingerprints), the MD p-value is wildly inaccurate.

## Structural Similar Compounds

| Name                        | C.I. direct brown 95                                                                | Omeprazole                                                                          | 5,6-Dimethoxysterigmatocystin                                                       |
|-----------------------------|-------------------------------------------------------------------------------------|-------------------------------------------------------------------------------------|-------------------------------------------------------------------------------------|
| Structure                   | 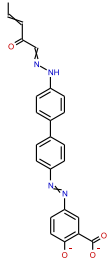 |  |  |
| Actual Endpoint (-log C)    | 5.31387                                                                             | 3.4628                                                                              | 6.02361                                                                             |
| Predicted Endpoint (-log C) | 4.30266                                                                             | 4.7324                                                                              | 4.98771                                                                             |
| Distance                    | 0.608                                                                               | 0.763                                                                               | 0.764                                                                               |
| Reference                   | CPDB                                                                                | CPDB                                                                                | CPDB                                                                                |

## Model Applicability

Unknown features are fingerprint features in the query molecule, but not found or appearing too infrequently in the training set.

1. OPS PC24 out of range. Value: -3.1965. Training min, max, SD, explained variance: -3.0088, 7.4204, 1.076, 0.0111.

## Feature Contribution

| Top features for positive contribution |            |                                                                                                                                |       |
|----------------------------------------|------------|--------------------------------------------------------------------------------------------------------------------------------|-------|
| Fingerprint                            | Bit/Smiles | Feature Structure                                                                                                              | Score |
| FCFP_6                                 | 565998553  | 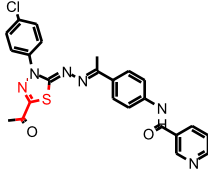<br><chem>[*]C(=[*])C1=N[*]S1</chem><br>1 | 0.357 |

|        |           |                                                                                                                      |       |
|--------|-----------|----------------------------------------------------------------------------------------------------------------------|-------|
| FCFP_6 | 565968762 | 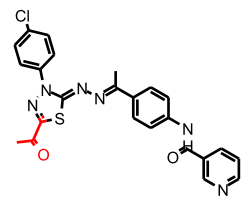<br><chem>[*]C(=[*])C(=O)C</chem> | 0.266 |
| FCFP_6 | 1         | <br><chem>[*]=O</chem>            | 0.234 |

### Top Features for negative contribution

| Fingerprint | Bit/Smiles | Feature Structure                                                                                                                               | Score  |
|-------------|------------|-------------------------------------------------------------------------------------------------------------------------------------------------|--------|
| FCFP_6      | 16         | 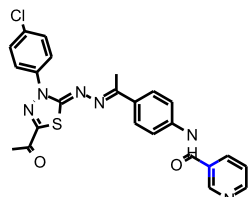<br><chem>[*][c](:[*]):[*]</chem>                            | -0.354 |
| FCFP_6      | 590925877  | <br><chem>[*]N[c](:[cH]:[*]):[cH]:[*]</chem>                | -0.323 |
| FCFP_6      | 1674451008 | <br><chem>[*]N([*])[c]1:[cH]:[cH]:[cH]:[*]:[c]:1[*]</chem> | -0.233 |





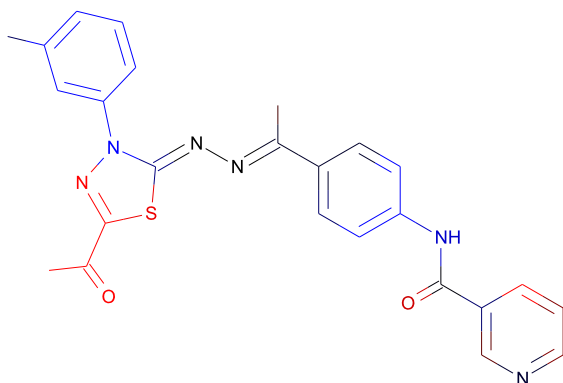

$C_{25}H_{22}N_6O_2S$

Molecular Weight: 470.54617

ALogP: 4.08

Rotatable Bonds: 6

Acceptors: 8

Donors: 1

## Model Prediction

Prediction: 11.5

Unit: mg/kg\_body\_weight/day

Mahalanobis Distance: 16.3

Mahalanobis Distance p-value: 2.97e-015

Mahalanobis Distance: The Mahalanobis distance (MD) is a generalization of the Euclidean distance that accounts for correlations among the X properties. It is calculated as the distance to the center of the training data. The larger the MD, the less trustworthy the prediction.

Mahalanobis Distance p-value: The p-value gives the fraction of training data with an MD greater than or equal to the one for the given sample, assuming normally distributed data. The smaller the p-value, the less trustworthy the prediction. For highly non-normal X properties (e.g., fingerprints), the MD p-value is wildly inaccurate.

## Structural Similar Compounds

| Name                        | C.I. direct brown 95 | Omeprazole | 5,6-Dimethoxysterigmatocystin |
|-----------------------------|----------------------|------------|-------------------------------|
| Structure                   |                      |            |                               |
| Actual Endpoint (-log C)    | 5.31387              | 3.4628     | 6.02361                       |
| Predicted Endpoint (-log C) | 4.30266              | 4.7324     | 4.98771                       |
| Distance                    | 0.595                | 0.746      | 0.752                         |
| Reference                   | CPDB                 | CPDB       | CPDB                          |

## Model Applicability

Unknown features are fingerprint features in the query molecule, but not found or appearing too infrequently in the training set.

- OPS PC24 out of range. Value: -3.7507. Training min, max, SD, explained variance: -3.0088, 7.4204, 1.076, 0.0111.

## Feature Contribution

### Top features for positive contribution

| Fingerprint | Bit/Smiles | Feature Structure                  | Score |
|-------------|------------|------------------------------------|-------|
| FCFP_6      | 565998553  | <br><chem>[*]C(=*)C1=N[*]S1</chem> | 0.357 |

|                                        |            |                                                                                                                                       |        |
|----------------------------------------|------------|---------------------------------------------------------------------------------------------------------------------------------------|--------|
| FCFP_6                                 | 565968762  | 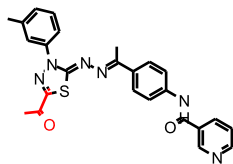<br><chem>[*]C(=[*])C(=O)C</chem>                  | 0.266  |
| FCFP_6                                 | 1          | <br><chem>[*]=O</chem>                             | 0.234  |
| Top Features for negative contribution |            |                                                                                                                                       |        |
| Fingerprint                            | Bit/Smiles | Feature Structure                                                                                                                     | Score  |
| FCFP_6                                 | 991735244  | <br><chem>[*][c]1:[*]:[cH]:[cH]:[cH]:[cH]:1</chem> | -0.422 |
| FCFP_6                                 | 16         | <br><chem>[*][c](:[*]):[*]</chem>                | -0.354 |
| FCFP_6                                 | 590925877  | <br><chem>[*]N[c](:[cH]:[*]):[cH]:[*]</chem>     | -0.323 |



**7d**

## TOPKAT Carcinogenic Potency TD50 Rat

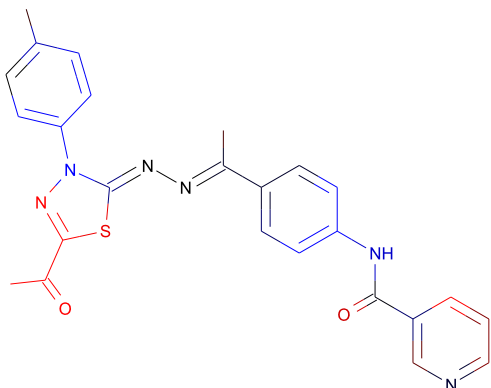
$$\text{C}_{25}\text{H}_{22}\text{N}_6\text{O}_2\text{S}$$

Molecular Weight: 470.54617

|ALogP: 4.08

Rotatable Bonds: 6

Acceptors: 8

Donors: 1

## Model Prediction

Prediction: 3.12

Unit: mg/kg\_body\_weight/day

Mahalanobis Distance: 15.6

Mahalanobis Distance p-value: 4.93e-013

**Mahalanobis Distance:** The Mahalanobis distance (MD) is a generalization of the Euclidean distance that accounts for correlations among the X properties. It is calculated as the distance to the center of the training data. The larger the MD, the less trustworthy the prediction.

Mahalanobis Distance p-value: The p-value gives the fraction of training data with an MD greater than or equal to the one for the given sample, assuming normally distributed data. The smaller the p-value, the less trustworthy the prediction. For highly non-normal X properties (e.g., fingerprints), the MD p-value is wildly inaccurate.

## Structural Similar Compounds

| Name                        | C.I. direct brown 95                                                                | Omeprazole                                                                          | 5,6-Dimethoxysterigmatocystin                                                       |
|-----------------------------|-------------------------------------------------------------------------------------|-------------------------------------------------------------------------------------|-------------------------------------------------------------------------------------|
| Structure                   | 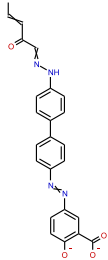 |  |  |
| Actual Endpoint (-log C)    | 5.31387                                                                             | 3.4628                                                                              | 6.02361                                                                             |
| Predicted Endpoint (-log C) | 4.30266                                                                             | 4.7324                                                                              | 4.98771                                                                             |
| Distance                    | 0.598                                                                               | 0.744                                                                               | 0.751                                                                               |
| Reference                   | CPDB                                                                                | CPDB                                                                                | CPDB                                                                                |

## Model Applicability

Unknown features are fingerprint features in the query molecule, but not found or appearing too infrequently in the training set.

1. OPS PC24 out of range. Value: -3.0664. Training min, max, SD, explained variance: -3.0088, 7.4204, 1.076, 0.0111.

## Feature Contribution

| Top features for positive contribution |            |                                                                                                                                |       |
|----------------------------------------|------------|--------------------------------------------------------------------------------------------------------------------------------|-------|
| Fingerprint                            | Bit/Smiles | Feature Structure                                                                                                              | Score |
| FCFP_6                                 | 565998553  | 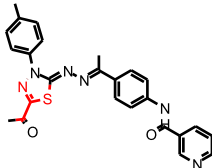<br><chem>[*]C(=[*])C1=N[*]S1</chem><br>1 | 0.357 |

|                                        |            |                                                                                                                                             |        |
|----------------------------------------|------------|---------------------------------------------------------------------------------------------------------------------------------------------|--------|
| FCFP_6                                 | 565968762  | 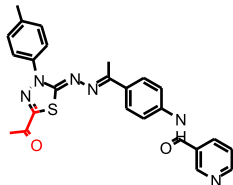<br><chem>[*]C(=[*])C(=O)C</chem>                        | 0.266  |
| FCFP_6                                 | 1          | <br><chem>[*]=O</chem>                                   | 0.234  |
| Top Features for negative contribution |            |                                                                                                                                             |        |
| Fingerprint                            | Bit/Smiles | Feature Structure                                                                                                                           | Score  |
| FCFP_6                                 | 16         | <br><chem>[*][c](:[*]):[*]</chem>                        | -0.354 |
| FCFP_6                                 | 590925877  | <br><chem>[*]N[c](:[cH]:[*]):[cH]:[*]</chem>           | -0.323 |
| FCFP_6                                 | 1674451008 | <br><chem>[*]N([*])[c]1:[cH]:[cH]:[cH]:[*]:1[*]</chem> | -0.233 |



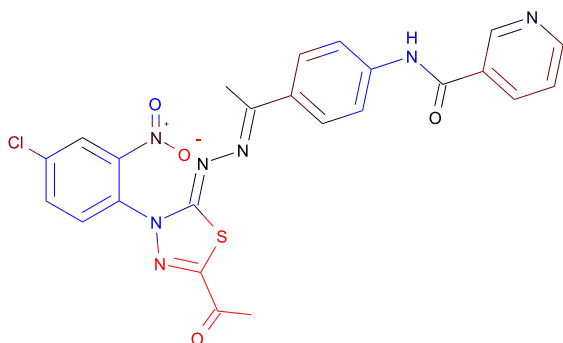

$C_{24}H_{18}ClN_7O_4S$

Molecular Weight: 535.96222

ALogP: 4.153

Rotatable Bonds: 7

Acceptors: 10

Donors: 1

## Model Prediction

Prediction: 1.2

Unit: mg/kg\_body\_weight/day

Mahalanobis Distance: 17.7

Mahalanobis Distance p-value: 4.87e-020

Mahalanobis Distance: The Mahalanobis distance (MD) is a generalization of the Euclidean distance that accounts for correlations among the X properties. It is calculated as the distance to the center of the training data. The larger the MD, the less trustworthy the prediction.

Mahalanobis Distance p-value: The p-value gives the fraction of training data with an MD greater than or equal to the one for the given sample, assuming normally distributed data. The smaller the p-value, the less trustworthy the prediction. For highly non-normal X properties (e.g., fingerprints), the MD p-value is wildly inaccurate.

## Structural Similar Compounds

| Name                        | C.I. direct brown 95 | 623     | 223     |
|-----------------------------|----------------------|---------|---------|
| Structure                   |                      |         |         |
| Actual Endpoint (-log C)    | 5.31387              | 2.39985 | 6.29867 |
| Predicted Endpoint (-log C) | 4.30266              | 3.4177  | 7.5657  |
| Distance                    | 0.718                | 0.729   | 0.811   |
| Reference                   | CPDB                 | CPDB    | CPDB    |

## Model Applicability

Unknown features are fingerprint features in the query molecule, but not found or appearing too infrequently in the training set.

1. OPS PC17 out of range. Value: -4.2325. Training min, max, SD, explained variance: -4.122, 4.7538, 1.355, 0.0176.
2. OPS PC24 out of range. Value: -4.0628. Training min, max, SD, explained variance: -3.0088, 7.4204, 1.076, 0.0111.

## Feature Contribution

| Top features for positive contribution |            |                   |       |
|----------------------------------------|------------|-------------------|-------|
| Fingerprint                            | Bit/Smiles | Feature Structure | Score |
| FCFP_6                                 | 5          |                   | 0.431 |

|                                        |            |                                                                                                                                                 |        |
|----------------------------------------|------------|-------------------------------------------------------------------------------------------------------------------------------------------------|--------|
| FCFP_6                                 | 565998553  | 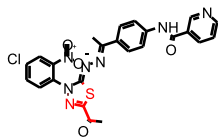<br><chem>[*]C(=[*])C1=N[*]][*]S1</chem>                     | 0.357  |
| FCFP_6                                 | 8          | <br><chem>[*][N+](=[*])[*]</chem>                            | 0.336  |
| Top Features for negative contribution |            |                                                                                                                                                 |        |
| Fingerprint                            | Bit/Smiles | Feature Structure                                                                                                                               | Score  |
| FCFP_6                                 | 16         | <br><chem>[*][c](:[*]):[*]</chem>                            | -0.354 |
| FCFP_6                                 | 590925877  | <br><chem>[*]N[c](:[cH]:[*]):[cH]:[*]</chem>               | -0.323 |
| FCFP_6                                 | 1674451008 | <br><chem>[*]N([*])[c]1:[cH]:[cH]:[cH]:[*]:[c]:1[*]</chem> | -0.233 |





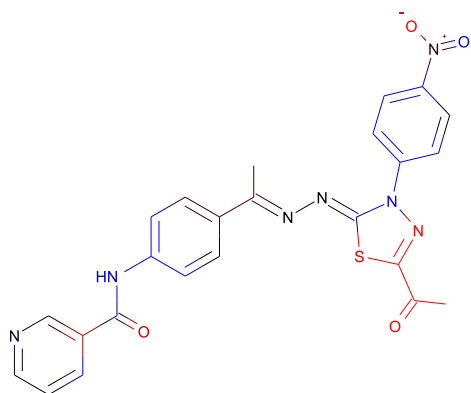

$C_{24}H_{19}N_7O_4S$

Molecular Weight: 501.51715

ALogP: 3.488

Rotatable Bonds: 7

Acceptors: 10

Donors: 1

## Model Prediction

Prediction: 1.91

Unit: mg/kg\_body\_weight/day

Mahalanobis Distance: 16.7

Mahalanobis Distance p-value: 1.49e-016

Mahalanobis Distance: The Mahalanobis distance (MD) is a generalization of the Euclidean distance that accounts for correlations among the X properties. It is calculated as the distance to the center of the training data. The larger the MD, the less trustworthy the prediction.

Mahalanobis Distance p-value: The p-value gives the fraction of training data with an MD greater than or equal to the one for the given sample, assuming normally distributed data. The smaller the p-value, the less trustworthy the prediction. For highly non-normal X properties (e.g., fingerprints), the MD p-value is wildly inaccurate.

## Structural Similar Compounds

| Name                        | 623     | C.I. direct brown 95 | 418     |
|-----------------------------|---------|----------------------|---------|
| Structure                   |         |                      |         |
| Actual Endpoint (-log C)    | 2.39985 | 5.31387              | 2.9349  |
| Predicted Endpoint (-log C) | 3.4177  | 4.30266              | 3.45907 |
| Distance                    | 0.676   | 0.698                | 0.768   |
| Reference                   | CPDB    | CPDB                 | CPDB    |

## Model Applicability

Unknown features are fingerprint features in the query molecule, but not found or appearing too infrequently in the training set.

1. OPS PC24 out of range. Value: -3.64. Training min, max, SD, explained variance: -3.0088, 7.4204, 1.076, 0.0111.

## Feature Contribution

### Top features for positive contribution

| Fingerprint | Bit/Smiles | Feature Structure | Score |
|-------------|------------|-------------------|-------|
| FCFP_6      | 5          |                   | 0.431 |

|                                        |            |                                                                                                                               |        |
|----------------------------------------|------------|-------------------------------------------------------------------------------------------------------------------------------|--------|
| FCFP_6                                 | 565998553  | 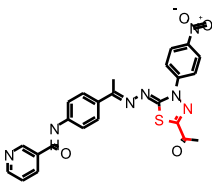 <chem>[*]C(=[*])C1=N[*]]1[S</chem>        | 0.357  |
| FCFP_6                                 | 8          |  <chem>[*][N+](=[*])[*]</chem>             | 0.336  |
| Top Features for negative contribution |            |                                                                                                                               |        |
| Fingerprint                            | Bit/Smiles | Feature Structure                                                                                                             | Score  |
| FCFP_6                                 | 16         |  <chem>[*][c](:[*]):[*]</chem>             | -0.354 |
| FCFP_6                                 | 590925877  |  <chem>[*]N([*])[c](:[cH]:[*]):[c</chem> | -0.323 |
| FCFP_6                                 | 1674451008 |  <chem>[*]N([*])[c]1:[cH]:[c</chem>      | -0.233 |



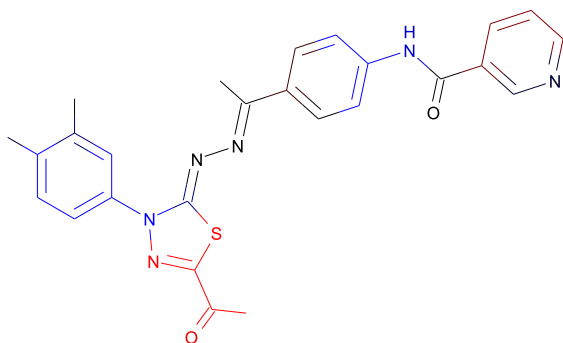
$$\text{C}_{26}\text{H}_{24}\text{N}_6\text{O}_2\text{S}$$

Molecular Weight: 484.57275

ALogP: 4.566

Rotatable Bonds: 6

Acceptors: 8

Donors: 1

## Model Prediction

Prediction: 4.03

Unit: mg/kg\_body\_weight/day

Mahalanobis Distance: 16.3

Mahalanobis Distance p-value: 3.36e-015

**Mahalanobis Distance:** The Mahalanobis distance (MD) is a generalization of the Euclidean distance that accounts for correlations among the X properties. It is calculated as the distance to the center of the training data. The larger the MD, the less trustworthy the prediction.

Mahalanobis Distance p-value: The p-value gives the fraction of training data with an MD greater than or equal to the one for the given sample, assuming normally distributed data. The smaller the p-value, the less trustworthy the prediction. For highly non-normal X properties (e.g., fingerprints), the MD p-value is wildly inaccurate.

## Structural Similar Compounds

| Name                        | C.I. direct brown 95                                                                | Omeprazole                                                                          | 5,6-Dimethoxysterigmatocystin                                                       |
|-----------------------------|-------------------------------------------------------------------------------------|-------------------------------------------------------------------------------------|-------------------------------------------------------------------------------------|
| Structure                   | 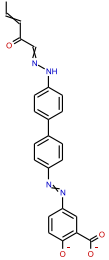 |  |  |
| Actual Endpoint (-log C)    | 5.31387                                                                             | 3.4628                                                                              | 6.02361                                                                             |
| Predicted Endpoint (-log C) | 4.30266                                                                             | 4.7324                                                                              | 4.98771                                                                             |
| Distance                    | 0.609                                                                               | 0.769                                                                               | 0.775                                                                               |
| Reference                   | CPDB                                                                                | CPDB                                                                                | CPDB                                                                                |

## Model Applicability

Unknown features are fingerprint features in the query molecule, but not found or appearing too infrequently in the training set.

1. OPS PC24 out of range. Value: -3.787. Training min, max, SD, explained variance: -3.0088, 7.4204, 1.076, 0.0111.

## Feature Contribution

| Top features for positive contribution |            |                                                                                                                                         |       |
|----------------------------------------|------------|-----------------------------------------------------------------------------------------------------------------------------------------|-------|
| Fingerprint                            | Bit/Smiles | Feature Structure                                                                                                                       | Score |
| FCFP_6                                 | 565998553  | 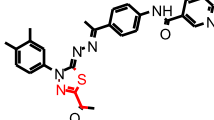<br><chem>[*]C(=O)C1=N[N+](=O)[S](=O)(=O)C1</chem> | 0.357 |

|                                        |            |                                                                                                                                                 |        |
|----------------------------------------|------------|-------------------------------------------------------------------------------------------------------------------------------------------------|--------|
| FCFP_6                                 | 565968762  | 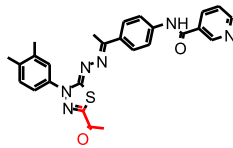<br><chem>[*]C(=[*])C(=O)C</chem>                            | 0.266  |
| FCFP_6                                 | 1          | <br><chem>[*]=O</chem>                                       | 0.234  |
| Top Features for negative contribution |            |                                                                                                                                                 |        |
| Fingerprint                            | Bit/Smiles | Feature Structure                                                                                                                               | Score  |
| FCFP_6                                 | 16         | <br><chem>[*][c](:[*]):[*]</chem>                            | -0.354 |
| FCFP_6                                 | 590925877  | <br><chem>[*]N[c](:[cH]:[*]):[cH]:[*]</chem>               | -0.323 |
| FCFP_6                                 | 1674451008 | <br><chem>[*]N([*])[c]1:[cH]:[cH]:[cH]:[*]:[c]:1[*]</chem> | -0.233 |



# Sorafenib

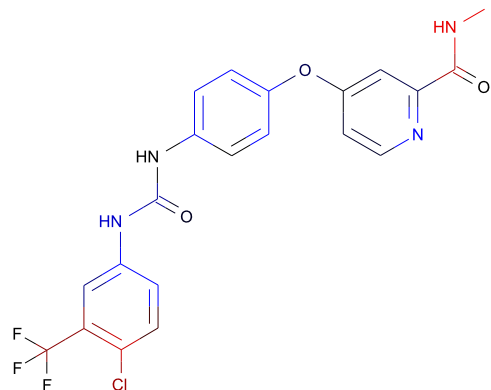

$C_{21}H_{16}ClF_3N_4O_3$

Molecular Weight: 464.82494

ALogP: 4.175

Rotatable Bonds: 6

Acceptors: 4

Donors: 3

## Model Prediction

Prediction: 14.2

Unit: mg/kg\_body\_weight/day

Mahalanobis Distance: 20.4

Mahalanobis Distance p-value: 9.56e-031

Mahalanobis Distance: The Mahalanobis distance (MD) is a generalization of the Euclidean distance that accounts for correlations among the X properties. It is calculated as the distance to the center of the training data. The larger the MD, the less trustworthy the prediction.

Mahalanobis Distance p-value: The p-value gives the fraction of training data with an MD greater than or equal to the one for the given sample, assuming normally distributed data. The smaller the p-value, the less trustworthy the prediction. For highly non-normal X properties (e.g., fingerprints), the MD p-value is wildly inaccurate.

# TOPKAT\_Carcinogenic\_Potency\_TD50\_Rat

## Structural Similar Compounds

| Name                        | Fluvastatin | 913     | Ochratoxin A |
|-----------------------------|-------------|---------|--------------|
| Structure                   |             |         |              |
| Actual Endpoint (-log C)    | 3.51742     | 3.51742 | 6.47264      |
| Predicted Endpoint (-log C) | 5.41573     | 5.41573 | 5.06501      |
| Distance                    | 0.597       | 0.597   | 0.666        |
| Reference                   | CPDB        | CPDB    | CPDB         |

## Model Applicability

Unknown features are fingerprint features in the query molecule, but not found or appearing too infrequently in the training set.

1. All properties and OPS components are within expected ranges.
2. Unknown FCFP\_2 feature: -1029533685: [\*]:[c](:[\*])C(F)(F)F

## Feature Contribution

### Top features for positive contribution

| Fingerprint | Bit/Smiles | Feature Structure | Score |
|-------------|------------|-------------------|-------|
| FCFP_6      | 1          | <br>[*]=O         | 0.234 |



|                                        |            |                                                                                                                                             |        |
|----------------------------------------|------------|---------------------------------------------------------------------------------------------------------------------------------------------|--------|
| FCFP_6                                 | -885550502 | 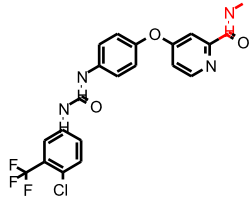<br><chem>[*]C(=[*])NC</chem>                            | 0.229  |
| FCFP_6                                 | 32         | <br><chem>[*]Cl</chem>                                   | 0.154  |
| Top Features for negative contribution |            |                                                                                                                                             |        |
| Fingerprint                            | Bit/Smiles | Feature Structure                                                                                                                           | Score  |
| FCFP_6                                 | 16         | <br><chem>[*][c](:[*]):[*]</chem>                        | -0.354 |
| FCFP_6                                 | 590925877  | <br><chem>[*]N[c](:[cH]:[*]):[cH]:[*]</chem>           | -0.323 |
| FCFP_6                                 | 1674451008 | <br><chem>[*]N([*])[c]1:[cH]:[cH]:[cH]:[*]:1[*]</chem> | -0.233 |



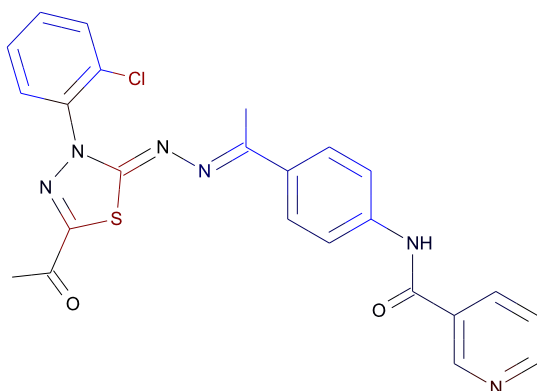

$C_{24}H_{19}ClN_6O_2S$

Molecular Weight: 490.96466

ALogP: 4.258

Rotatable Bonds: 6

Acceptors: 8

Donors: 1

## Model Prediction

Prediction: 0.0619

Unit: g/kg\_body\_weight

Mahalanobis Distance: 34.2

Mahalanobis Distance p-value: 3.23e-032

Mahalanobis Distance: The Mahalanobis distance (MD) is a generalization of the Euclidean distance that accounts for correlations among the X properties. It is calculated as the distance to the center of the training data. The larger the MD, the less trustworthy the prediction.

Mahalanobis Distance p-value: The p-value gives the fraction of training data with an MD greater than or equal to the one for the given sample, assuming normally distributed data. The smaller the p-value, the less trustworthy the prediction. For highly non-normal X properties (e.g., fingerprints), the MD p-value is wildly inaccurate.

## Structural Similar Compounds

| Name                        | DILTIAZEM | D & C RED 9      | RESERPINE  |
|-----------------------------|-----------|------------------|------------|
| Structure                   |           |                  |            |
| Actual Endpoint (-log C)    | 4.21961   | 3.87715          | 6.38645    |
| Predicted Endpoint (-log C) | 4.005     | 3.6546           | 5.548      |
| Distance                    | 0.738     | 0.752            | 0.768      |
| Reference                   | NDA-18602 | NTP REPORT # 225 | NTP 193 22 |

## Model Applicability

Unknown features are fingerprint features in the query molecule, but not found or appearing too infrequently in the training set.

- OPS PC32 out of range. Value: 4.2981. Training min, max, SD, explained variance: -4.2021, 4.2975, 1.228, 0.0066.
- Unknown ECFP\_6 feature: 912478223: [\*]S[\*]
- Unknown ECFP\_6 feature: 1430169877: [\*]NC(=O)[c](:[\*]):[\*]
- Unknown ECFP\_6 feature: -175146122: [\*]C(=[\*])[c](:[cH]:[\*]):[cH]:[\*]
- Unknown ECFP\_6 feature: -177077903: [\*]N[c](:[cH]:[\*]):[cH]:[\*]
- Unknown ECFP\_6 feature: 128986386: [\*]N=C(/C)[c](:[\*]):[\*]
- Unknown ECFP\_6 feature: 562081661: [\*]C(=NN=[\*])[\*]
- Unknown ECFP\_6 feature: -819426257: [\*]C(=NN=[\*])[\*]
- Unknown ECFP\_6 feature: 2122741631: [\*]C1=[\*][\*]C(=[\*])S1
- Unknown ECFP\_6 feature: 189949281: [\*]N=C\1/S[\*]=[\*]N1[\*]
- Unknown ECFP\_6 feature: -1110911409: [\*]=C1[\*][\*]=NN1[c](:[\*]):[\*]
- Unknown ECFP\_6 feature: 2092245922: [\*]N1[\*][\*]C(=N1)[\*]
- Unknown ECFP\_6 feature: -934225701: [\*]C(=[\*])C1=N[\*][\*]S1
- Unknown ECFP\_6 feature: -1236953626: [\*]N([\*])[c](:[cH]:[\*]):[c]([\*]):[\*]
- Unknown ECFP\_6 feature: 1997021792: [\*]:[cH]:[cH]:[cH]:[\*]
- Unknown ECFP\_6 feature: 129482634: [\*]C(=[\*])C(=O)C
- Unknown ECFP\_6 feature: -709633021: [\*][c](:[\*]):[cH]:n:[\*]
- Unknown ECFP\_6 feature: -677055651: [\*]:[cH]:n:[cH]:[\*]
- Unknown ECFP\_6 feature: 1996163143: [\*]:[cH]:[cH]:n:[\*]

20. Unknown ECFP\_6 feature: 99947387: [\*]:[c](:[\*])Cl

## Feature Contribution

### Top features for positive contribution

| Fingerprint | Bit/Smiles  | Feature Structure                                                                                                         | Score  |
|-------------|-------------|---------------------------------------------------------------------------------------------------------------------------|--------|
| FCFP_6      | -1143715940 | 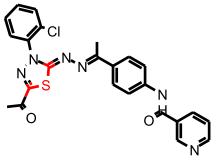<br><chem>[*]C1=[*][*]C(=[*])S1</chem> | 0.13   |
| FCFP_6      | 32          | <br><chem>[*]Cl</chem>                 | 0.101  |
| FCFP_6      | 3           | <br><chem>[*]N[*]</chem>              | 0.0924 |

### Top Features for negative contribution

| Fingerprint | Bit/Smiles | Feature Structure                                                                                                                       | Score  |
|-------------|------------|-----------------------------------------------------------------------------------------------------------------------------------------|--------|
| FCFP_6      | 991735244  | 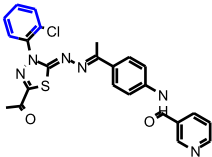<br><chem>[*][c]1:[*]:[cH]:[cH]:[cH]:[cH]:1</chem> | -0.134 |

|        |            |                                                                                                                                      |        |
|--------|------------|--------------------------------------------------------------------------------------------------------------------------------------|--------|
| ECFP_6 | 1564392544 | 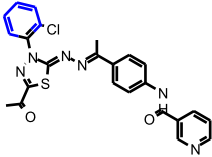 <p> [*][c]1:[*]:[cH]:[cH]<br/> :[cH]:[cH]:1 </p> | -0.133 |
| FCFP_6 | 1          |  <p> [*]=O </p>                                   | -0.102 |

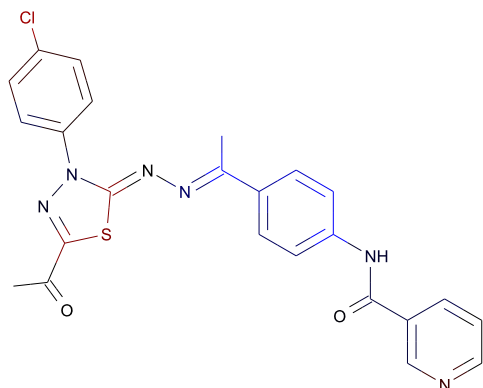

$C_{24}H_{19}ClN_6O_2S$

Molecular Weight: 490.96465

ALogP: 4.258

Rotatable Bonds: 6

Acceptors: 8

Donors: 1

## Model Prediction

Prediction: 0.0276

Unit: g/kg\_body\_weight

Mahalanobis Distance: 31.9

Mahalanobis Distance p-value: 4.44e-028

Mahalanobis Distance: The Mahalanobis distance (MD) is a generalization of the Euclidean distance that accounts for correlations among the X properties. It is calculated as the distance to the center of the training data. The larger the MD, the less trustworthy the prediction.

Mahalanobis Distance p-value: The p-value gives the fraction of training data with an MD greater than or equal to the one for the given sample, assuming normally distributed data. The smaller the p-value, the less trustworthy the prediction. For highly non-normal X properties (e.g., fingerprints), the MD p-value is wildly inaccurate.

## Structural Similar Compounds

| Name                        | DILTIAZEM | D & C RED 9      | ASSURE                          |
|-----------------------------|-----------|------------------|---------------------------------|
| Structure                   |           |                  |                                 |
| Actual Endpoint (-log C)    | 4.21961   | 3.87715          | 5.00328                         |
| Predicted Endpoint (-log C) | 4.005     | 3.6546           | 4.27671                         |
| Distance                    | 0.748     | 0.758            | 0.762                           |
| Reference                   | NDA-18602 | NTP REPORT # 225 | EPA COVER SHEET 0335;891001;(1) |

## Model Applicability

Unknown features are fingerprint features in the query molecule, but not found or appearing too infrequently in the training set.

1. All properties and OPS components are within expected ranges.
2. Unknown ECFP\_6 feature: 912478223: [\*]S[\*]
3. Unknown ECFP\_6 feature: 1430169877: [\*]NC(=O)[c](:[\*]):[\*]
4. Unknown ECFP\_6 feature: -175146122: [\*]C(=[\*])[c](:[cH]:[\*]):[cH]:[\*]
5. Unknown ECFP\_6 feature: -177077903: [\*]N[c](:[cH]:[\*]):[cH]:[\*]
6. Unknown ECFP\_6 feature: 128986386: [\*]N=C(/C)[c](:[\*]):[\*]
7. Unknown ECFP\_6 feature: 562081661: [\*]C(=NN=[\*])[\*]
8. Unknown ECFP\_6 feature: -819426257: [\*]C(=NN=[\*])[\*]
9. Unknown ECFP\_6 feature: 2122741631: [\*]C1=[\*][\*]C(=[\*])S1
10. Unknown ECFP\_6 feature: 189949281: [\*]N=C\1/S[\*]=[\*]N1[\*]
11. Unknown ECFP\_6 feature: -1110911409: [\*]=C1[\*][\*]=NN1[c](:[\*]):[\*]
12. Unknown ECFP\_6 feature: 2092245922: [\*]N1[\*][\*]C(=N1)[\*]
13. Unknown ECFP\_6 feature: -934225701: [\*]C(=[\*])C1=N[\*][\*]S1
14. Unknown ECFP\_6 feature: -175021654: [\*]N([\*])[c](:[cH]:[\*]):[cH]:[\*]
15. Unknown ECFP\_6 feature: -176494269: [\*]:[cH]:[c](Cl):[cH]:[\*]
16. Unknown ECFP\_6 feature: 99947387: [\*]:[c](:[\*])Cl
17. Unknown ECFP\_6 feature: 129482634: [\*]C(=[\*])C(=O)C
18. Unknown ECFP\_6 feature: -709633021: [\*][c](:[\*]):[cH]:n:[\*]
19. Unknown ECFP\_6 feature: -677055651: [\*]:[cH]:n:[cH]:[\*]

20. Unknown ECFP\_6 feature: 1996163143: [\*]:[cH]:[cH]:n:[\*]  
 21. Unknown ECFP\_6 feature: 1997021792: [\*]:[cH]:[cH]:[cH]:[\*]

## Feature Contribution

### Top features for positive contribution

| Fingerprint | Bit/Smiles  | Feature Structure                                                                                                         | Score  |
|-------------|-------------|---------------------------------------------------------------------------------------------------------------------------|--------|
| FCFP_6      | -1143715940 | 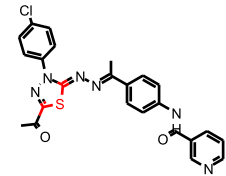<br><chem>[*]C1=[*][*]C(=[*])S1</chem> | 0.13   |
| FCFP_6      | 32          | <br><chem>[*]Cl</chem>                 | 0.101  |
| FCFP_6      | 3           | <br><chem>[*]N[*]</chem>              | 0.0924 |

### Top Features for negative contribution

| Fingerprint | Bit/Smiles | Feature Structure                                                                                           | Score  |
|-------------|------------|-------------------------------------------------------------------------------------------------------------|--------|
| FCFP_6      | 1          | 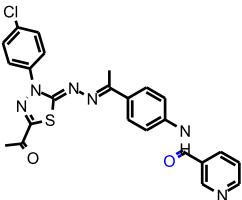<br><chem>[*]=O</chem> | -0.102 |

|        |             |                                                                                                                                         |         |
|--------|-------------|-----------------------------------------------------------------------------------------------------------------------------------------|---------|
| ECFP_6 | -1087070950 | 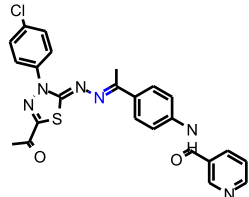 <p>[*]N=[*]</p>                                     | -0.102  |
| FCFP_6 | -453677277  |  <p>[*]C(=[*])[c]1:[cH]:[*]:[c]([*]):[cH]:[cH]:1</p> | -0.0906 |



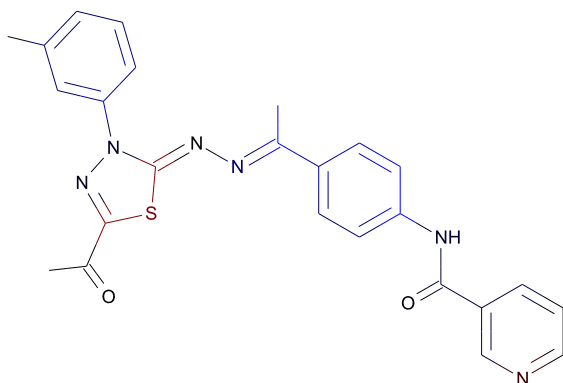

$C_{25}H_{22}N_6O_2S$

Molecular Weight: 470.54617

ALogP: 4.08

Rotatable Bonds: 6

Acceptors: 8

Donors: 1

## Model Prediction

Prediction: 0.0494

Unit: g/kg\_body\_weight

Mahalanobis Distance: 32.6

Mahalanobis Distance p-value: 2.34e-029

Mahalanobis Distance: The Mahalanobis distance (MD) is a generalization of the Euclidean distance that accounts for correlations among the X properties. It is calculated as the distance to the center of the training data. The larger the MD, the less trustworthy the prediction.

Mahalanobis Distance p-value: The p-value gives the fraction of training data with an MD greater than or equal to the one for the given sample, assuming normally distributed data. The smaller the p-value, the less trustworthy the prediction. For highly non-normal X properties (e.g., fingerprints), the MD p-value is wildly inaccurate.

## Structural Similar Compounds

| Name                        | DILTIAZEM | D & C RED 9      | C.I.PIGMENT RED 23 |
|-----------------------------|-----------|------------------|--------------------|
| Structure                   |           |                  |                    |
| Actual Endpoint (-log C)    | 4.21961   | 3.87715          | 2.28997            |
| Predicted Endpoint (-log C) | 4.005     | 3.6546           | 3.52921            |
| Distance                    | 0.732     | 0.760            | 0.771              |
| Reference                   | NDA-18602 | NTP REPORT # 225 | NTP 411 146        |

## Model Applicability

Unknown features are fingerprint features in the query molecule, but not found or appearing too infrequently in the training set.

1. All properties and OPS components are within expected ranges.
2. Unknown ECFP\_6 feature: 912478223: [\*]S[\*]
3. Unknown ECFP\_6 feature: 1430169877: [\*]NC(=O)[c](:[\*]):[\*]
4. Unknown ECFP\_6 feature: -175146122: [\*]C(=[\*])[c](:[cH]:[\*]):[cH]:[\*]
5. Unknown ECFP\_6 feature: -177077903: [\*]N[c](:[cH]:[\*]):[cH]:[\*]
6. Unknown ECFP\_6 feature: 128986386: [\*]N=C(/C)[c](:[\*]):[\*]
7. Unknown ECFP\_6 feature: 562081661: [\*]C(=NN=[\*])[\*]
8. Unknown ECFP\_6 feature: -819426257: [\*]C(=NN=[\*])[\*]
9. Unknown ECFP\_6 feature: 2122741631: [\*]C1=[\*][\*]C(=[\*])S1
10. Unknown ECFP\_6 feature: 189949281: [\*]N=C\1/S[\*]=[\*]N1[\*]
11. Unknown ECFP\_6 feature: -1110911409: [\*]=C1[\*][\*]=NN1[c](:[\*]):[\*]
12. Unknown ECFP\_6 feature: 2092245922: [\*]N1[\*][\*]C(=N1)[\*]
13. Unknown ECFP\_6 feature: -934225701: [\*]C(=[\*])C1=N[\*][\*]S1
14. Unknown ECFP\_6 feature: -175021654: [\*]N([\*])[c](:[cH]:[\*]):[cH]:[\*]
15. Unknown ECFP\_6 feature: 1997021792: [\*]:[cH]:[cH]:[cH]:[\*]
16. Unknown ECFP\_6 feature: -179515162: [\*]:[cH]:[c]([C]):[cH]:[\*]
17. Unknown ECFP\_6 feature: 129482634: [\*]C(=[\*])C(=O)C
18. Unknown ECFP\_6 feature: -709633021: [\*][c](:[\*]):[cH]:n:[\*]
19. Unknown ECFP\_6 feature: -677055651: [\*]:[cH]:n:[cH]:[\*]
20. Unknown ECFP\_6 feature: 1996163143: [\*]:[cH]:[cH]:n:[\*]

## Feature Contribution

| Top features for positive contribution |             |                                                                                                                                         |        |
|----------------------------------------|-------------|-----------------------------------------------------------------------------------------------------------------------------------------|--------|
| Fingerprint                            | Bit/Smiles  | Feature Structure                                                                                                                       | Score  |
| FCFP_6                                 | -1143715940 | 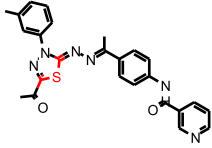<br><chem>[*]C1=[*][*]C(=[*])S1</chem>               | 0.13   |
| FCFP_6                                 | 3           | <br><chem>[*]N[*]</chem>                             | 0.0924 |
| ECFP_6                                 | 2099970318  | <br><chem>[*]C(=O)[*]</chem>                         | 0.0766 |
| Top Features for negative contribution |             |                                                                                                                                         |        |
| Fingerprint                            | Bit/Smiles  | Feature Structure                                                                                                                       | Score  |
| FCFP_6                                 | 991735244   | <br><chem>[*][c]1:[*]:[cH]:[cH]:[cH]:[cH]:1</chem> | -0.134 |
|                                        |             |                                                                                                                                         |        |

|        |             |                                                                                                     |        |
|--------|-------------|-----------------------------------------------------------------------------------------------------|--------|
| FCFP_6 | 1           | 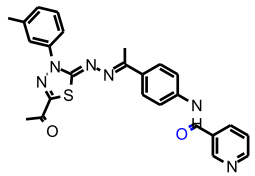 <p>[*]=O</p>    | -0.102 |
| ECFP_6 | -1087070950 |  <p>[*]N=[*]</p> | -0.102 |

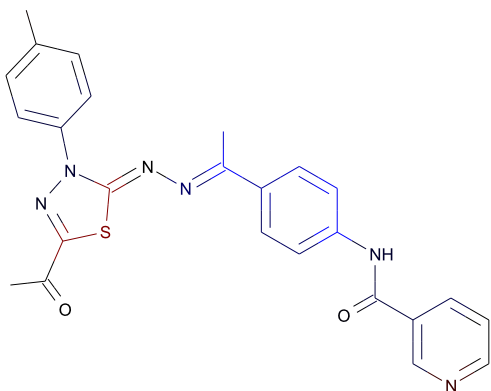

$C_{25}H_{22}N_6O_2S$

Molecular Weight: 470.54617

ALogP: 4.08

Rotatable Bonds: 6

Acceptors: 8

Donors: 1

## Model Prediction

Prediction: 0.0383

Unit: g/kg\_body\_weight

Mahalanobis Distance: 31.4

Mahalanobis Distance p-value: 3.26e-027

Mahalanobis Distance: The Mahalanobis distance (MD) is a generalization of the Euclidean distance that accounts for correlations among the X properties. It is calculated as the distance to the center of the training data. The larger the MD, the less trustworthy the prediction.

Mahalanobis Distance p-value: The p-value gives the fraction of training data with an MD greater than or equal to the one for the given sample, assuming normally distributed data. The smaller the p-value, the less trustworthy the prediction. For highly non-normal X properties (e.g., fingerprints), the MD p-value is wildly inaccurate.

## Structural Similar Compounds

| Name                        | DILTIAZEM | D & C RED 9      | ASSURE                          |
|-----------------------------|-----------|------------------|---------------------------------|
| Structure                   |           |                  |                                 |
| Actual Endpoint (-log C)    | 4.21961   | 3.87715          | 5.00328                         |
| Predicted Endpoint (-log C) | 4.005     | 3.6546           | 4.27671                         |
| Distance                    | 0.733     | 0.764            | 0.776                           |
| Reference                   | NDA-18602 | NTP REPORT # 225 | EPA COVER SHEET 0335;891001;(1) |

## Model Applicability

Unknown features are fingerprint features in the query molecule, but not found or appearing too infrequently in the training set.

1. All properties and OPS components are within expected ranges.
2. Unknown ECFP\_6 feature: 912478223: [\*]S[\*]
3. Unknown ECFP\_6 feature: 1430169877: [\*]NC(=O)[c](:[\*]):[\*]
4. Unknown ECFP\_6 feature: -175146122: [\*]C(=[\*])[c](:[cH]:[\*]):[cH]:[\*]
5. Unknown ECFP\_6 feature: -177077903: [\*]N[c](:[cH]:[\*]):[cH]:[\*]
6. Unknown ECFP\_6 feature: 128986386: [\*]N=C(/C)[c](:[\*]):[\*]
7. Unknown ECFP\_6 feature: 562081661: [\*]C(=NN=[\*])[\*]
8. Unknown ECFP\_6 feature: -819426257: [\*]C(=NN=[\*])[\*]
9. Unknown ECFP\_6 feature: 2122741631: [\*]C1=[\*][\*]C(=[\*])S1
10. Unknown ECFP\_6 feature: 189949281: [\*]N=C\1/S[\*]=[\*]N1[\*]
11. Unknown ECFP\_6 feature: -1110911409: [\*]=C1[\*][\*]=NN1[c](:[\*]):[\*]
12. Unknown ECFP\_6 feature: 2092245922: [\*]N1[\*][\*]C(=N1)[\*]
13. Unknown ECFP\_6 feature: -934225701: [\*]C(=[\*])C1=N[\*][\*]S1
14. Unknown ECFP\_6 feature: -175021654: [\*]N([\*])[c](:[cH]:[\*]):[cH]:[\*]
15. Unknown ECFP\_6 feature: -179515162: [\*]:[cH]:[c](C):[cH]:[\*]
16. Unknown ECFP\_6 feature: 129482634: [\*]C(=[\*])C(=O)C
17. Unknown ECFP\_6 feature: -709633021: [\*][c](:[\*]):[cH]:n:[\*]
18. Unknown ECFP\_6 feature: -677055651: [\*]:[cH]:n:[cH]:[\*]
19. Unknown ECFP\_6 feature: 1996163143: [\*]:[cH]:[cH]:n:[\*]

20. Unknown ECFP\_6 feature: 1997021792: [\*]:[cH]:[cH]:[cH]:[\*]

## Feature Contribution

### Top features for positive contribution

| Fingerprint | Bit/Smiles  | Feature Structure                                                                                                         | Score  |
|-------------|-------------|---------------------------------------------------------------------------------------------------------------------------|--------|
| FCFP_6      | -1143715940 | 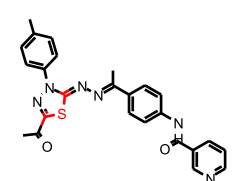<br><chem>[*]C1=[*][*]C(=[*])S1</chem> | 0.13   |
| FCFP_6      | 3           | <br><chem>[*]N[*]</chem>               | 0.0924 |
| ECFP_6      | 2099970318  | <br><chem>[*]C(=O)[*]</chem>          | 0.0766 |

### Top Features for negative contribution

| Fingerprint | Bit/Smiles | Feature Structure                                                                                           | Score  |
|-------------|------------|-------------------------------------------------------------------------------------------------------------|--------|
| FCFP_6      | 1          | 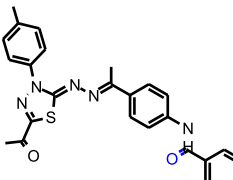<br><chem>[*]=O</chem> | -0.102 |

|        |             |                                                                                                                                                    |         |
|--------|-------------|----------------------------------------------------------------------------------------------------------------------------------------------------|---------|
| ECFP_6 | -1087070950 | 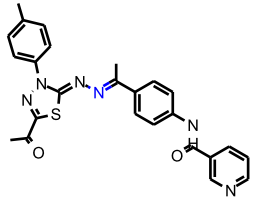 <p>[*]N=[*]</p>                                                | -0.102  |
| FCFP_6 | -453677277  |  <p>[*]C(=[*])[c]1:[cH]:[<br/>*]:[c]([*]):[cH]:[cH]<br/>]:1</p> | -0.0906 |

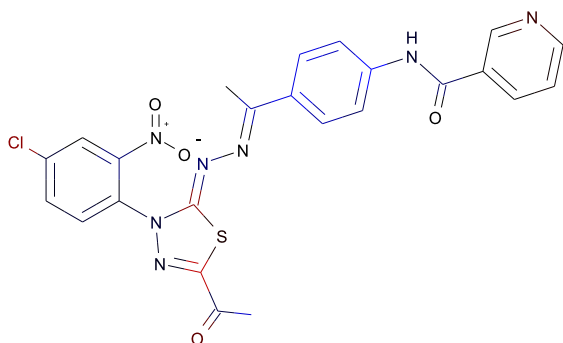

$C_{24}H_{18}ClN_7O_4S$

Molecular Weight: 535.96222

ALogP: 4.153

Rotatable Bonds: 7

Acceptors: 10

Donors: 1

## Model Prediction

Prediction: 0.0304

Unit: g/kg\_body\_weight

Mahalanobis Distance: 36.6

Mahalanobis Distance p-value: 2.15e-036

Mahalanobis Distance: The Mahalanobis distance (MD) is a generalization of the Euclidean distance that accounts for correlations among the X properties. It is calculated as the distance to the center of the training data. The larger the MD, the less trustworthy the prediction.

Mahalanobis Distance p-value: The p-value gives the fraction of training data with an MD greater than or equal to the one for the given sample, assuming normally distributed data. The smaller the p-value, the less trustworthy the prediction. For highly non-normal X properties (e.g., fingerprints), the MD p-value is wildly inaccurate.

## Structural Similar Compounds

| Name                        | C.I. PIGMENT RED 23 | C.I. ACID ORANGE 3 | RESERPINE  |
|-----------------------------|---------------------|--------------------|------------|
| Structure                   |                     |                    |            |
| Actual Endpoint (-log C)    | 2.28997             | 3.20573            | 6.38645    |
| Predicted Endpoint (-log C) | 3.52921             | 3.55956            | 5.548      |
| Distance                    | 0.641               | 0.765              | 0.775      |
| Reference                   | NTP 411 146         | NTP REPORT # 335   | NTP 193 22 |

## Model Applicability

Unknown features are fingerprint features in the query molecule, but not found or appearing too infrequently in the training set.

1. All properties and OPS components are within expected ranges.
2. Unknown FCFP\_2 feature: 5: [\*][O-]
3. Unknown FCFP\_2 feature: -828984032: [\*][c](:[\*]):[c](:[cH]:[\*])[N+](=[\*])[\*]
4. Unknown FCFP\_2 feature: -1338588315: [\*]:[c](:[\*])[N+](=O)[O-]
5. Unknown FCFP\_2 feature: 1872392852: [\*][N+](=O)[\*]
6. Unknown FCFP\_2 feature: 260476081: [\*][N+](=[\*])[O-]
7. Unknown ECFP\_6 feature: 912478223: [\*]S[\*]
8. Unknown ECFP\_6 feature: 1043790491: [\*][N+](=[\*])[\*]
9. Unknown ECFP\_6 feature: 781519895: [\*][O-]
10. Unknown ECFP\_6 feature: 2122741631: [\*]C1=[\*][\*]C(=[\*])S1
11. Unknown ECFP\_6 feature: -934225701: [\*]C(=[\*])C1=N[\*][\*]S1
12. Unknown ECFP\_6 feature: 2092245922: [\*]N1[\*][\*]C(=N1)[\*]
13. Unknown ECFP\_6 feature: -1110911409: [\*]=C1[\*][\*]=NN1[c](:[\*]):[\*]
14. Unknown ECFP\_6 feature: 189949281: [\*]N=C\1/S[\*]=[\*]N1[\*]
15. Unknown ECFP\_6 feature: 129482634: [\*]C(=[\*])C(=O)C
16. Unknown ECFP\_6 feature: -1236953626: [\*]N([\*])[c](:[cH]:[\*]):[c]([\*]):[\*]
17. Unknown ECFP\_6 feature: -1956535100: [\*][c](:[\*]):[c](:[cH]:[\*])[N+](=[\*])[\*]
18. Unknown ECFP\_6 feature: -176494269: [\*]:[cH]:[c](Cl):[cH]:[\*]
19. Unknown ECFP\_6 feature: 99947387: [\*]:[c](:[\*])Cl
20. Unknown ECFP\_6 feature: -819426257: [\*]C(=NN=[\*])[\*]

21. Unknown ECFP\_6 feature: 562081661: [\*]C(=NN=[\*])[\*]
22. Unknown ECFP\_6 feature: 128986386: [\*]N=C(/C)[c](:[\*]):[\*]
23. Unknown ECFP\_6 feature: -175146122: [\*]C(=[\*])[c](:[cH]:[\*]):[cH]:[\*]
24. Unknown ECFP\_6 feature: -177077903: [\*]N[c](:[cH]:[\*]):[cH]:[\*]
25. Unknown ECFP\_6 feature: 1430169877: [\*]NC(=O)[c](:[\*]):[\*]
26. Unknown ECFP\_6 feature: 1997021792: [\*]:[cH]:[cH]:[cH]:[\*]
27. Unknown ECFP\_6 feature: 1996163143: [\*]:[cH]:[cH]:n:[\*]
28. Unknown ECFP\_6 feature: -677055651: [\*]:[cH]:n:[cH]:[\*]
29. Unknown ECFP\_6 feature: -709633021: [\*][c](:[\*]):[cH]:n:[\*]
30. Unknown ECFP\_6 feature: -215026467: [\*]:[c](:[\*])[N+](=O)[O-]
31. Unknown ECFP\_6 feature: 2104376220: [\*][N+](=O)[\*]
32. Unknown ECFP\_6 feature: -659271057: [\*][N+](=[\*])[O-]

## Feature Contribution

### Top features for positive contribution

| Fingerprint | Bit/Smiles  | Feature Structure                                                                                            | Score  |
|-------------|-------------|--------------------------------------------------------------------------------------------------------------|--------|
| FCFP_6      | -1143715940 | 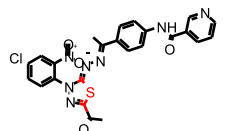<br>[*]C1=[*][*]C(=[*])S1 | 0.13   |
| FCFP_6      | 32          | <br>[*]Cl                | 0.101  |
| FCFP_6      | 3           | <br>[*]N[*]             | 0.0924 |

### Top Features for negative contribution



| Fingerprint | Bit/Smiles  | Feature Structure                                                                                                                                 | Score   |
|-------------|-------------|---------------------------------------------------------------------------------------------------------------------------------------------------|---------|
| FCFP_6      | 1           | 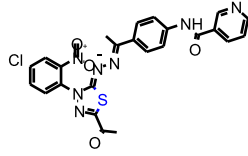 <p>[*]=O</p>                                                  | -0.102  |
| ECFP_6      | -1087070950 |  <p>[*]N=[*]</p>                                               | -0.102  |
| FCFP_6      | -453677277  |  <p>[*]C(=[*])[c]1:[cH]:[<br/>*]:[c]([*]):[cH]:[cH<br/>]:1</p> | -0.0906 |

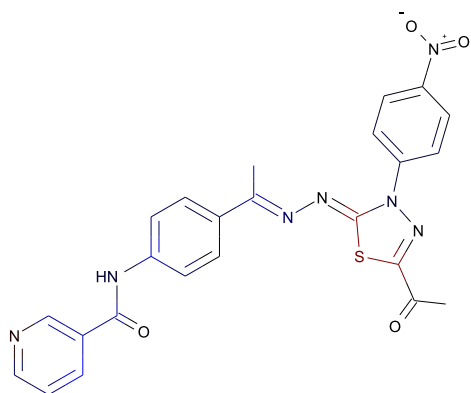

$C_{24}H_{19}N_7O_4S$

Molecular Weight: 501.51715

ALogP: 3.488

Rotatable Bonds: 7

Acceptors: 10

Donors: 1

## Model Prediction

Prediction: 0.0345

Unit: g/kg\_body\_weight

Mahalanobis Distance: 34.4

Mahalanobis Distance p-value: 1.36e-032

Mahalanobis Distance: The Mahalanobis distance (MD) is a generalization of the Euclidean distance that accounts for correlations among the X properties. It is calculated as the distance to the center of the training data. The larger the MD, the less trustworthy the prediction.

Mahalanobis Distance p-value: The p-value gives the fraction of training data with an MD greater than or equal to the one for the given sample, assuming normally distributed data. The smaller the p-value, the less trustworthy the prediction. For highly non-normal X properties (e.g., fingerprints), the MD p-value is wildly inaccurate.

## Structural Similar Compounds

| Name                        | C.I. PIGMENT RED 23 | C.I. ACID ORANGE 3 | 3-HYDROXY-4-(2;4-XYLYLAZO)-2;7 |
|-----------------------------|---------------------|--------------------|--------------------------------|
| Structure                   |                     |                    |                                |
| Actual Endpoint (-log C)    | 2.28997             | 3.20573            | 3.63994                        |
| Predicted Endpoint (-log C) | 3.52921             | 3.55956            | 3.60721                        |
| Distance                    | 0.656               | 0.743              | 0.784                          |
| Reference                   | NTP 411 146         | NTP REPORT # 335   | RQTOX ECAO CIN R638;9807;(4)   |

## Model Applicability

Unknown features are fingerprint features in the query molecule, but not found or appearing too infrequently in the training set.

1. All properties and OPS components are within expected ranges.
2. Unknown FCFP\_2 feature: 5: [\*][O-]
3. Unknown FCFP\_2 feature: -828984032: [\*][c](:[\*]):[c](:[cH]:[\*])[N+](=[\*])[\*]
4. Unknown FCFP\_2 feature: -1338588315: [\*]:[c](:[\*])[N+](=O)[O-]
5. Unknown FCFP\_2 feature: 1872392852: [\*][N+](=O)[\*]
6. Unknown FCFP\_2 feature: 260476081: [\*][N+](=[\*])[O-]
7. Unknown ECFP\_6 feature: 912478223: [\*]S[\*]
8. Unknown ECFP\_6 feature: 1043790491: [\*][N+](=[\*])[\*]
9. Unknown ECFP\_6 feature: 781519895: [\*][O-]
10. Unknown ECFP\_6 feature: 1997021792: [\*]:[cH]:[cH]:[cH]:[\*]
11. Unknown ECFP\_6 feature: 1996163143: [\*]:[cH]:[cH]:n:[\*]
12. Unknown ECFP\_6 feature: -677055651: [\*]:[cH]:n:[cH]:[\*]
13. Unknown ECFP\_6 feature: -709633021: [\*][c](:[\*]):[cH]:n:[\*]
14. Unknown ECFP\_6 feature: -175146122: [\*]C(=[\*])[c](:[cH]:[\*]):[cH]:[\*]
15. Unknown ECFP\_6 feature: 1430169877: [\*]NC(=O)[c](:[\*]):[\*]
16. Unknown ECFP\_6 feature: -177077903: [\*]N[c](:[cH]:[\*]):[cH]:[\*]
17. Unknown ECFP\_6 feature: 128986386: [\*]N=C(/C)[c](:[\*]):[\*]
18. Unknown ECFP\_6 feature: 562081661: [\*]C(=NN=[\*])[\*]
19. Unknown ECFP\_6 feature: -819426257: [\*]C(=NN=[\*])[\*]

20. Unknown ECFP\_6 feature: -179073144: [\*][N+](=[\*])[c](:[cH]:[\*]):[cH]:[\*]
21. Unknown ECFP\_6 feature: -175021654: [\*]N([\*])[c](:[cH]:[\*]):[cH]:[\*]
22. Unknown ECFP\_6 feature: 129482634: [\*]C(=[\*])C(=O)C
23. Unknown ECFP\_6 feature: 189949281: [\*]\N=C\1/S[\*]=[\*]N1[\*]
24. Unknown ECFP\_6 feature: -1110911409: [\*]=C1[\*][\*]=NN1[c](:[\*]):[\*]
25. Unknown ECFP\_6 feature: 2092245922: [\*]N1[\*][\*]C(=N1)[\*]
26. Unknown ECFP\_6 feature: -934225701: [\*]C(=[\*])C1=N[\*][\*]S1
27. Unknown ECFP\_6 feature: 2122741631: [\*]C1=[\*][\*]C(=[\*])S1
28. Unknown ECFP\_6 feature: -215026467: [\*]:[c](:[\*])[N+](=O)[O-]
29. Unknown ECFP\_6 feature: 2104376220: [\*][N+](=O)[\*]
30. Unknown ECFP\_6 feature: -659271057: [\*][N+](=[\*])[O-]

## Feature Contribution

| Top features for positive contribution |             |                                                                                                                           |        |
|----------------------------------------|-------------|---------------------------------------------------------------------------------------------------------------------------|--------|
| Fingerprint                            | Bit/Smiles  | Feature Structure                                                                                                         | Score  |
| FCFP_6                                 | -1143715940 | 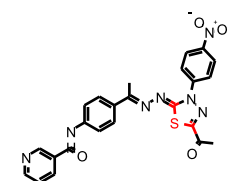<br><chem>[*]C1=[*][*]C(=[*])S1</chem> | 0.13   |
| FCFP_6                                 | 3           | <br><chem>[*]N[*]</chem>              | 0.0924 |
| ECFP_6                                 | 2099970318  | <br><chem>[*]C(=O)[*]</chem>         | 0.0766 |
| Top Features for negative contribution |             |                                                                                                                           |        |
| Fingerprint                            | Bit/Smiles  | Feature Structure                                                                                                         | Score  |

|        |             |                                                                                                                                                    |         |
|--------|-------------|----------------------------------------------------------------------------------------------------------------------------------------------------|---------|
| FCFP_6 | 1           | 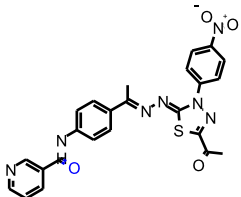 <p>[*]=O</p>                                                   | -0.102  |
| ECFP_6 | -1087070950 |  <p>[*]N=[*]</p>                                                | -0.102  |
| FCFP_6 | -453677277  |  <p>[*]C(=[*])[c]1:[cH]:[<br/>*]:[c]([*]):[cH]:[cH]<br/>]:1</p> | -0.0906 |

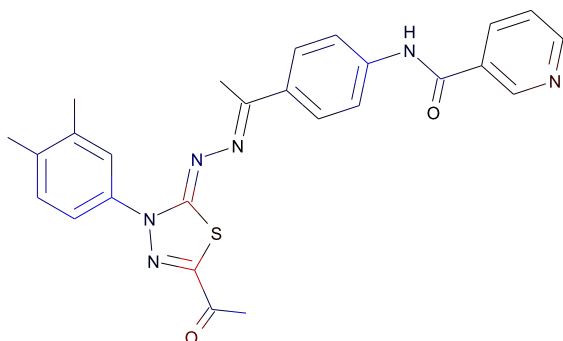

$C_{26}H_{24}N_6O_2S$

Molecular Weight: 484.57275

ALogP: 4.566

Rotatable Bonds: 6

Acceptors: 8

Donors: 1

## Model Prediction

Prediction: 0.0368

Unit: g/kg\_body\_weight

Mahalanobis Distance: 32.2

Mahalanobis Distance p-value: 1.26e-028

Mahalanobis Distance: The Mahalanobis distance (MD) is a generalization of the Euclidean distance that accounts for correlations among the X properties. It is calculated as the distance to the center of the training data. The larger the MD, the less trustworthy the prediction.

Mahalanobis Distance p-value: The p-value gives the fraction of training data with an MD greater than or equal to the one for the given sample, assuming normally distributed data. The smaller the p-value, the less trustworthy the prediction. For highly non-normal X properties (e.g., fingerprints), the MD p-value is wildly inaccurate.

## Structural Similar Compounds

| Name                        | DILTIAZEM | RESERPINE  | C.I.PIGMENT RED 23 |
|-----------------------------|-----------|------------|--------------------|
| Structure                   |           |            |                    |
| Actual Endpoint (-log C)    | 4.21961   | 6.38645    | 2.28997            |
| Predicted Endpoint (-log C) | 4.005     | 5.548      | 3.52921            |
| Distance                    | 0.753     | 0.756      | 0.760              |
| Reference                   | NDA-18602 | NTP 193 22 | NTP 411 146        |

## Model Applicability

Unknown features are fingerprint features in the query molecule, but not found or appearing too infrequently in the training set.

1. All properties and OPS components are within expected ranges.
2. Unknown ECFP\_6 feature: 912478223: [\*]S[\*]
3. Unknown ECFP\_6 feature: 2122741631: [\*]C1=[\*][\*]C(=[\*])S1
4. Unknown ECFP\_6 feature: -934225701: [\*]C(=[\*])C1=N[\*][\*]S1
5. Unknown ECFP\_6 feature: 2092245922: [\*]N1[\*][\*]C(=N1)[\*]
6. Unknown ECFP\_6 feature: -1110911409: [\*]=C1[\*][\*]=NN1[c](:[\*]):[\*]
7. Unknown ECFP\_6 feature: 189949281: [\*]N=C\1/S[\*]=[\*]N1[\*]
8. Unknown ECFP\_6 feature: 129482634: [\*]C(=[\*])C(=O)C
9. Unknown ECFP\_6 feature: -175021654: [\*]N([\*])[c](:[cH]:[\*]):[cH]:[\*]
10. Unknown ECFP\_6 feature: -819426257: [\*]C(=NN=[\*])[\*]
11. Unknown ECFP\_6 feature: 562081661: [\*]C(=NN=[\*])[\*]
12. Unknown ECFP\_6 feature: 128986386: [\*]N=C(/C)[c](:[\*]):[\*]
13. Unknown ECFP\_6 feature: -175146122: [\*]C(=[\*])[c](:[cH]:[\*]):[cH]:[\*]
14. Unknown ECFP\_6 feature: -177077903: [\*]N[c](:[cH]:[\*]):[cH]:[\*]
15. Unknown ECFP\_6 feature: 1430169877: [\*]NC(=O)[c](:[\*]):[\*]
16. Unknown ECFP\_6 feature: -709633021: [\*][c](:[\*]):[cH]:n:[\*]
17. Unknown ECFP\_6 feature: -677055651: [\*]:[cH]:n:[cH]:[\*]
18. Unknown ECFP\_6 feature: 1996163143: [\*]:[cH]:[cH]:n:[\*]
19. Unknown ECFP\_6 feature: 1997021792: [\*]:[cH]:[cH]:[cH]:[\*]

## Feature Contribution

| Top features for positive contribution |             |                                                                                                                                  |        |
|----------------------------------------|-------------|----------------------------------------------------------------------------------------------------------------------------------|--------|
| Fingerprint                            | Bit/Smiles  | Feature Structure                                                                                                                | Score  |
| FCFP_6                                 | -1143715940 | 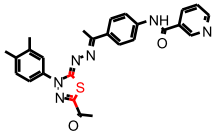<br><chem>[*]C1=[*][*]C(=[*])S1</chem>        | 0.13   |
| ECFP_6                                 | 2147419938  | <br><chem>[*][c](:[*]):[c](C):[cH]:[*]</chem> | 0.098  |
| FCFP_6                                 | 3           | <br><chem>[*]N[*]</chem>                      | 0.0924 |
| Top Features for negative contribution |             |                                                                                                                                  |        |
| Fingerprint                            | Bit/Smiles  | Feature Structure                                                                                                                | Score  |
| FCFP_6                                 | 1           | <br><chem>[*]=O</chem>                      | -0.102 |
|                                        |             |                                                                                                                                  |        |

|        |             |                                                                                                                                                  |         |
|--------|-------------|--------------------------------------------------------------------------------------------------------------------------------------------------|---------|
| ECFP_6 | -1087070950 | 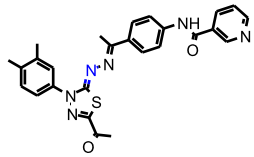<br><chem>[*]N=[*]</chem>                                     | -0.102  |
| FCFP_6 | -453677277  | <br><chem>[*]C(=[*])[c]1:[cH]:[*]:[c]([*]):[cH]:[cH]:1</chem> | -0.0906 |

# Sorafenib

# TOPKAT\_Chronic\_LOAEL

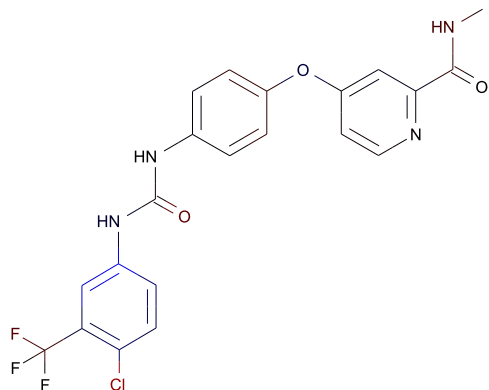

C<sub>21</sub>H<sub>16</sub>ClF<sub>3</sub>N<sub>4</sub>O<sub>3</sub>

Molecular Weight: 464.82494

ALogP: 4.175

Rotatable Bonds: 6

Acceptors: 4

Donors: 3

## Model Prediction

Prediction: 0.00483

Unit: g/kg\_body\_weight

Mahalanobis Distance: 30

Mahalanobis Distance p-value: 1.21e-024

Mahalanobis Distance: The Mahalanobis distance (MD) is a generalization of the Euclidean distance that accounts for correlations among the X properties. It is calculated as the distance to the center of the training data. The larger the MD, the less trustworthy the prediction.

Mahalanobis Distance p-value: The p-value gives the fraction of training data with an MD greater than or equal to the one for the given sample, assuming normally distributed data. The smaller the p-value, the less trustworthy the prediction. For highly non-normal X properties (e.g., fingerprints), the MD p-value is wildly inaccurate.

## Structural Similar Compounds

| Name                        | GLYBURIDE | D & C RED 9      | SODIUM ACIFLUORFEN              |
|-----------------------------|-----------|------------------|---------------------------------|
| Structure                   |           |                  |                                 |
| Actual Endpoint (-log C)    | 4.21661   | 3.87715          | 4.16036                         |
| Predicted Endpoint (-log C) | 4.21035   | 3.6546           | 4.65915                         |
| Distance                    | 0.636     | 0.722            | 0.736                           |
| Reference                   | UPJ-26452 | NTP REPORT # 225 | EPA COVER SHEET 0192;891101;(1) |

## Model Applicability

Unknown features are fingerprint features in the query molecule, but not found or appearing too infrequently in the training set.

1. All properties and OPS components are within expected ranges.
2. Unknown ECFP\_6 feature: -1046436026: [\*]F
3. Unknown ECFP\_6 feature: 99947387: [\*]:[c](:[\*])Cl
4. Unknown ECFP\_6 feature: 226796801: [\*]C([\*])([\*])F
5. Unknown ECFP\_6 feature: 1305253718: [\*]:[c](:[\*])O[c](:[\*]):[\*]
6. Unknown ECFP\_6 feature: -677309799: [\*][c](:[\*]):n:[cH]:[\*]
7. Unknown ECFP\_6 feature: 1338334141: [\*]C(=[\*])NC
8. Unknown ECFP\_6 feature: -177077903: [\*]N[c](:[cH]:[\*]):[cH]:[\*]
9. Unknown ECFP\_6 feature: 1336678434: [\*][c](:[\*]):[c](:[cH]:[\*])C([\*])([\*])[\*]
10. Unknown ECFP\_6 feature: -649580166: [\*]NC(=O)N[\*]
11. Unknown ECFP\_6 feature: -1952889961: [\*]:[c](:[\*])C(F)(F)F
12. Unknown ECFP\_6 feature: 1413420509: [\*]C(=[\*])[c](:[cH]:[\*]):n:[\*]
13. Unknown ECFP\_6 feature: 1996163143: [\*]:[cH]:[cH]:n:[\*]
14. Unknown ECFP\_6 feature: 1430169877: [\*]NC(=O)[c](:[\*]):[\*]
15. Unknown ECFP\_6 feature: 864287155: [\*]NC

## Feature Contribution

Top features for positive contribution



| Fingerprint                            | Bit/Smiles | Feature Structure                                                                                                              | Score  |
|----------------------------------------|------------|--------------------------------------------------------------------------------------------------------------------------------|--------|
| ECFP_6                                 | -176455838 | 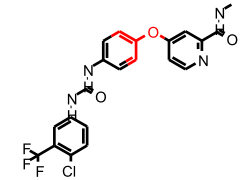<br><chem>[*]O[c]([cH]:[*]):[cH]:[*]</chem> | 0.106  |
| FCFP_6                                 | 32         | <br><chem>[*]Cl</chem>                      | 0.101  |
| FCFP_6                                 | 3          | <br><chem>[*]N[*]</chem>                    | 0.0924 |
| Top Features for negative contribution |            |                                                                                                                                |        |
| Fingerprint                            | Bit/Smiles | Feature Structure                                                                                                              | Score  |
| FCFP_6                                 | 1          | <br><chem>[*]=O</chem>                    | -0.102 |
|                                        |            |                                                                                                                                |        |

|        |             |                                                                                                                                    |         |
|--------|-------------|------------------------------------------------------------------------------------------------------------------------------------|---------|
| ECFP_6 | -1236483485 | 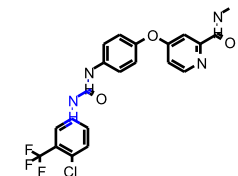 <chem>[*]C(=[*])N[c](:[*]):[*]</chem>          | -0.0747 |
| FCFP_6 | 203677720   |  <chem>[*]C(=[*])[c](:[cH]:[*]):[cH]:[*]</chem> | -0.0713 |

7a

TOPKAT\_Rat\_Maximum\_Tolerated\_Dose\_Feed

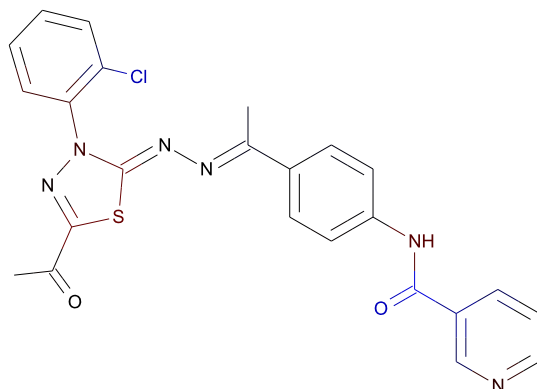C<sub>24</sub>H<sub>19</sub>ClN<sub>6</sub>O<sub>2</sub>S

Molecular Weight: 490.96466

ALogP: 4.258

Rotatable Bonds: 6

Acceptors: 8

Donors: 1

## Model Prediction

Prediction: 0.0508

Unit: g/kg\_body\_weight

Mahalanobis Distance: 10.7

Mahalanobis Distance p-value: 3.02e-006

Mahalanobis Distance: The Mahalanobis distance (MD) is a generalization of the Euclidean distance that accounts for correlations among the X properties. It is calculated as the distance to the center of the training data. The larger the MD, the less trustworthy the prediction.

Mahalanobis Distance p-value: The p-value gives the fraction of training data with an MD greater than or equal to the one for the given sample, assuming normally distributed data. The smaller the p-value, the less trustworthy the prediction. For highly non-normal X properties (e.g., fingerprints), the MD p-value is wildly inaccurate.

## Structural Similar Compounds

| Name                        | SALICYLAZOSULFAPYRIDINE | RESERPINE      | C.I.PIGMENT RED 23 |
|-----------------------------|-------------------------|----------------|--------------------|
| Structure                   |                         |                |                    |
| Actual Endpoint (-log C)    | 3.375                   | 6.13118        | 2.30052            |
| Predicted Endpoint (-log C) | 2.80292                 | 4.38304        | 3.55333            |
| Distance                    | 0.730                   | 0.734          | 0.811              |
| Reference                   | NCI/NTP TR-457          | NCI/NTP TR-193 | NCI/NTP TR-411     |

## Model Applicability

Unknown features are fingerprint features in the query molecule, but not found or appearing too infrequently in the training set.

1. All properties and OPS components are within expected ranges.

## Feature Contribution

### Top features for positive contribution

| Fingerprint | Bit/Smiles  | Feature Structure                      | Score |
|-------------|-------------|----------------------------------------|-------|
| FCFP_2      | -1143715940 | <br><chem>[*]C1=[*][*]C(=[*])S1</chem> | 0.095 |

|                                        |            |                                                                                                                                          |         |
|----------------------------------------|------------|------------------------------------------------------------------------------------------------------------------------------------------|---------|
| FCFP_2                                 | 3          | 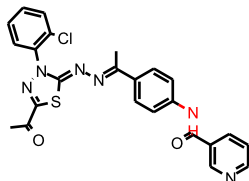<br><chem>[*]N[*]</chem>                              | 0.0737  |
| FCFP_2                                 | 332760439  | <br><chem>[*]N([*])[c](:[cH]:[*]):[c]([*]):[*]</chem> | 0.0611  |
| Top Features for negative contribution |            |                                                                                                                                          |         |
| Fingerprint                            | Bit/Smiles | Feature Structure                                                                                                                        | Score   |
| FCFP_2                                 | 71476542   | <br><chem>[*]:[c](:[*])Cl</chem>                      | -0.134  |
| FCFP_2                                 | 1872154524 | <br><chem>[*]C(=O)[*]</chem>                        | -0.105  |
| FCFP_2                                 | 203677720  | <br><chem>[*]C(=[*])[c](:[cH]:[*]):[cH]:[*]</chem>  | -0.0829 |



7b

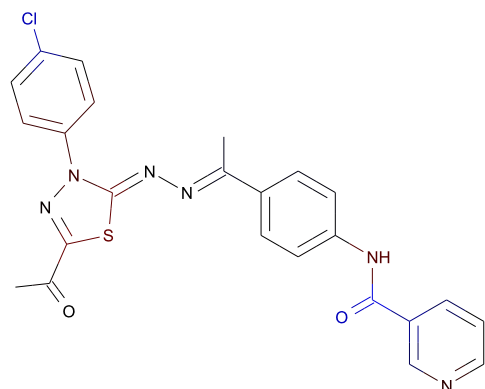C<sub>24</sub>H<sub>19</sub>ClN<sub>6</sub>O<sub>2</sub>S

Molecular Weight: 490.96465

ALogP: 4.258

Rotatable Bonds: 6

Acceptors: 8

Donors: 1

## Model Prediction

Prediction: 0.0508

Unit: g/kg\_body\_weight

Mahalanobis Distance: 10.7

Mahalanobis Distance p-value: 3.02e-006

Mahalanobis Distance: The Mahalanobis distance (MD) is a generalization of the Euclidean distance that accounts for correlations among the X properties. It is calculated as the distance to the center of the training data. The larger the MD, the less trustworthy the prediction.

Mahalanobis Distance p-value: The p-value gives the fraction of training data with an MD greater than or equal to the one for the given sample, assuming normally distributed data. The smaller the p-value, the less trustworthy the prediction. For highly non-normal X properties (e.g., fingerprints), the MD p-value is wildly inaccurate.

## TOPKAT\_Rat\_Maximum\_Tolerated\_Dose\_Feed

### Structural Similar Compounds

| Name                        | SALICYLAZOSULFAPYRIDINE | RESERPINE      | C.I.PIGMENT RED 23 |
|-----------------------------|-------------------------|----------------|--------------------|
| Structure                   |                         |                |                    |
| Actual Endpoint (-log C)    | 3.375                   | 6.13118        | 2.30052            |
| Predicted Endpoint (-log C) | 2.80292                 | 4.38304        | 3.55333            |
| Distance                    | 0.730                   | 0.734          | 0.811              |
| Reference                   | NCI/NTP TR-457          | NCI/NTP TR-193 | NCI/NTP TR-411     |

### Model Applicability

Unknown features are fingerprint features in the query molecule, but not found or appearing too infrequently in the training set.

1. All properties and OPS components are within expected ranges.

### Feature Contribution

| Top features for positive contribution |             |                                        |       |
|----------------------------------------|-------------|----------------------------------------|-------|
| Fingerprint                            | Bit/Smiles  | Feature Structure                      | Score |
| FCFP_2                                 | -1143715940 | <br><chem>[*]C1=[*][*]C(=[*])S1</chem> | 0.095 |

|                                        |            |                                                                                                                                          |         |
|----------------------------------------|------------|------------------------------------------------------------------------------------------------------------------------------------------|---------|
| FCFP_2                                 | 3          | 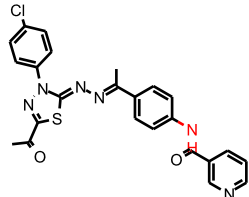<br><chem>[*]N[*]</chem>                              | 0.0737  |
| FCFP_2                                 | 332760439  | <br><chem>[*]N([*])[c](:[cH]:[*]):[c]([*]):[*]</chem> | 0.0611  |
| Top Features for negative contribution |            |                                                                                                                                          |         |
| Fingerprint                            | Bit/Smiles | Feature Structure                                                                                                                        | Score   |
| FCFP_2                                 | 71476542   | <br><chem>[*]:[c](:[*])Cl</chem>                      | -0.134  |
| FCFP_2                                 | 1872154524 | <br><chem>[*]C(=O)[*]</chem>                        | -0.105  |
| FCFP_2                                 | 203677720  | <br><chem>[*]C(=[*])[c](:[cH]:[*]):[cH]:[*]</chem>  | -0.0829 |





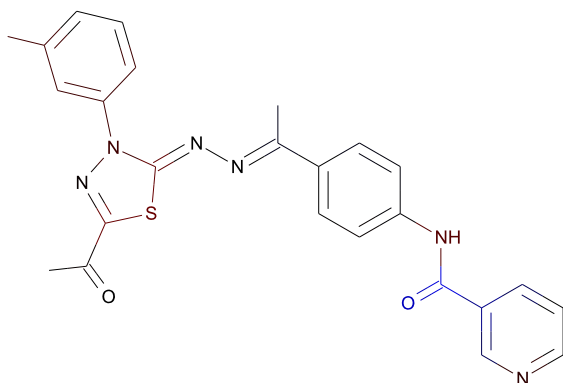C<sub>25</sub>H<sub>22</sub>N<sub>6</sub>O<sub>2</sub>S

Molecular Weight: 470.54617

ALogP: 4.08

Rotatable Bonds: 6

Acceptors: 8

Donors: 1

## Model Prediction

Prediction: 0.0344

Unit: g/kg\_body\_weight

Mahalanobis Distance: 10.4

Mahalanobis Distance p-value: 9.12e-006

Mahalanobis Distance: The Mahalanobis distance (MD) is a generalization of the Euclidean distance that accounts for correlations among the X properties. It is calculated as the distance to the center of the training data. The larger the MD, the less trustworthy the prediction.

Mahalanobis Distance p-value: The p-value gives the fraction of training data with an MD greater than or equal to the one for the given sample, assuming normally distributed data. The smaller the p-value, the less trustworthy the prediction. For highly non-normal X properties (e.g., fingerprints), the MD p-value is wildly inaccurate.

## Structural Similar Compounds

| Name                        | SALICYLAZOSULFAPYRIDINE | RESERPINE      | C.I.PIGMENT RED 3 |
|-----------------------------|-------------------------|----------------|-------------------|
| Structure                   |                         |                |                   |
| Actual Endpoint (-log C)    | 3.375                   | 6.13118        | 2.65635           |
| Predicted Endpoint (-log C) | 2.80292                 | 4.38304        | 2.97957           |
| Distance                    | 0.704                   | 0.749          | 0.802             |
| Reference                   | NCI/NTP TR-457          | NCI/NTP TR-193 | NCI/NTP TR-407    |

## Model Applicability

Unknown features are fingerprint features in the query molecule, but not found or appearing too infrequently in the training set.

1. All properties and OPS components are within expected ranges.

## Feature Contribution

### Top features for positive contribution

| Fingerprint | Bit/Smiles  | Feature Structure                      | Score |
|-------------|-------------|----------------------------------------|-------|
| FCFP_2      | -1143715940 | <br><chem>[*]C1=[*][*]C(=[*])S1</chem> | 0.095 |

|                                        |            |                                                                                                                                |         |
|----------------------------------------|------------|--------------------------------------------------------------------------------------------------------------------------------|---------|
| FCFP_2                                 | 3          | 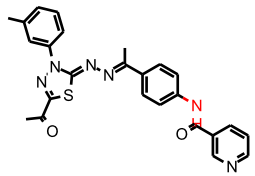<br>[*]N[*]                                 | 0.0737  |
| FCFP_2                                 | 136120670  | <br>[*]:[c](:[*])C                          | 0.064   |
| Top Features for negative contribution |            |                                                                                                                                |         |
| Fingerprint                            | Bit/Smiles | Feature Structure                                                                                                              | Score   |
| FCFP_2                                 | 1872154524 | <br>[*]C(=O)[*]                             | -0.105  |
| FCFP_2                                 | 203677720  | <br>[*]C(=[*])[c](:[cH]:[<br>*]):[cH]:[*] | -0.0829 |
| FCFP_2                                 | 1          | <br>[*]=O                                 | -0.0796 |



7d

TOPKAT\_Rat\_Maximum\_Tolerated\_Dose\_Feed

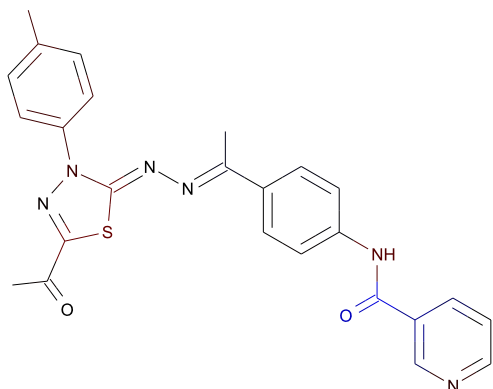C<sub>25</sub>H<sub>22</sub>N<sub>6</sub>O<sub>2</sub>S

Molecular Weight: 470.54617

ALogP: 4.08

Rotatable Bonds: 6

Acceptors: 8

Donors: 1

## Model Prediction

Prediction: 0.0344

Unit: g/kg\_body\_weight

Mahalanobis Distance: 10.4

Mahalanobis Distance p-value: 9.12e-006

Mahalanobis Distance: The Mahalanobis distance (MD) is a generalization of the Euclidean distance that accounts for correlations among the X properties. It is calculated as the distance to the center of the training data. The larger the MD, the less trustworthy the prediction.

Mahalanobis Distance p-value: The p-value gives the fraction of training data with an MD greater than or equal to the one for the given sample, assuming normally distributed data. The smaller the p-value, the less trustworthy the prediction. For highly non-normal X properties (e.g., fingerprints), the MD p-value is wildly inaccurate.

## Structural Similar Compounds

| Name                        | SALICYLAZOSULFAPYRIDINE | RESERPINE      | C.I.PIGMENT RED 3 |
|-----------------------------|-------------------------|----------------|-------------------|
| Structure                   |                         |                |                   |
| Actual Endpoint (-log C)    | 3.375                   | 6.13118        | 2.65635           |
| Predicted Endpoint (-log C) | 2.80292                 | 4.38304        | 2.97957           |
| Distance                    | 0.704                   | 0.749          | 0.802             |
| Reference                   | NCI/NTP TR-457          | NCI/NTP TR-193 | NCI/NTP TR-407    |

## Model Applicability

Unknown features are fingerprint features in the query molecule, but not found or appearing too infrequently in the training set.

1. All properties and OPS components are within expected ranges.

## Feature Contribution

### Top features for positive contribution

| Fingerprint | Bit/Smiles  | Feature Structure                      | Score |
|-------------|-------------|----------------------------------------|-------|
| FCFP_2      | -1143715940 | <br><chem>[*]C1=[*][*]C(=[*])S1</chem> | 0.095 |

|                                        |            |                                                                                                                                         |         |
|----------------------------------------|------------|-----------------------------------------------------------------------------------------------------------------------------------------|---------|
| FCFP_2                                 | 3          | 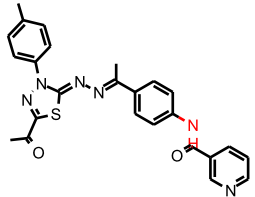<br><chem>[*]N[*]</chem>                             | 0.0737  |
| FCFP_2                                 | 136120670  | <br><chem>[*]:[c](:[*])C</chem>                      | 0.064   |
| Top Features for negative contribution |            |                                                                                                                                         |         |
| Fingerprint                            | Bit/Smiles | Feature Structure                                                                                                                       | Score   |
| FCFP_2                                 | 1872154524 | <br><chem>[*]C(=O)[*]</chem>                         | -0.105  |
| FCFP_2                                 | 203677720  | <br><chem>[*]C(=[*])[c](:[cH]:[*]):[cH]:[*]</chem> | -0.0829 |
| FCFP_2                                 | 1          | <br><chem>[*]=O</chem>                             | -0.0796 |



7e

TOPKAT\_Rat\_Maximum\_Tolerated\_Dose\_Feed

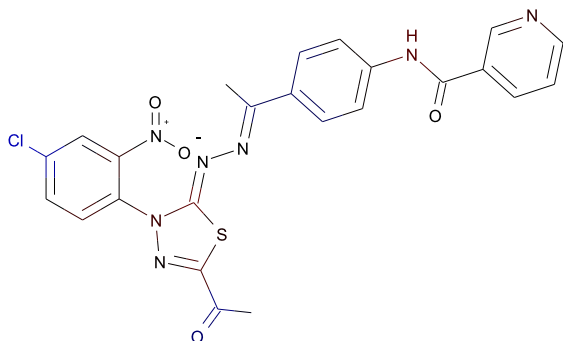C<sub>24</sub>H<sub>18</sub>ClN<sub>7</sub>O<sub>4</sub>S

Molecular Weight: 535.96222

ALogP: 4.153

Rotatable Bonds: 7

Acceptors: 10

Donors: 1

## Model Prediction

Prediction: 0.0369

Unit: g/kg\_body\_weight

Mahalanobis Distance: 11.6

Mahalanobis Distance p-value: 7.44e-008

Mahalanobis Distance: The Mahalanobis distance (MD) is a generalization of the Euclidean distance that accounts for correlations among the X properties. It is calculated as the distance to the center of the training data. The larger the MD, the less trustworthy the prediction.

Mahalanobis Distance p-value: The p-value gives the fraction of training data with an MD greater than or equal to the one for the given sample, assuming normally distributed data. The smaller the p-value, the less trustworthy the prediction. For highly non-normal X properties (e.g., fingerprints), the MD p-value is wildly inaccurate.

## Structural Similar Compounds

| Name                        | C.I.PIGMENT RED 23 | SALICYLAZOSULFAPYRIDINE | RESERPINE      |
|-----------------------------|--------------------|-------------------------|----------------|
| Structure                   |                    |                         |                |
| Actual Endpoint (-log C)    | 2.30052            | 3.375                   | 6.13118        |
| Predicted Endpoint (-log C) | 3.55333            | 2.80292                 | 4.38304        |
| Distance                    | 0.681              | 0.769                   | 0.805          |
| Reference                   | NCI/NTP TR-411     | NCI/NTP TR-457          | NCI/NTP TR-193 |

## Model Applicability

Unknown features are fingerprint features in the query molecule, but not found or appearing too infrequently in the training set.

1. OPS PC5 out of range. Value: 5.5211. Training min, max, SD, explained variance: -3.3892, 5.0834, 1.644, 0.0611.
2. Unknown FCFP\_2 feature: 8: [\*][N+](=O)[\*]
3. Unknown FCFP\_2 feature: 5: [\*][O-]
4. Unknown FCFP\_2 feature: -828984032: [\*][c](:[\*]):[c](:[cH]:[\*])[N+](=O)[\*]
5. Unknown FCFP\_2 feature: -1338588315: [\*]:[c](:[\*])[N+](=O)[O-]
6. Unknown FCFP\_2 feature: 1872392852: [\*][N+](=O)[\*]
7. Unknown FCFP\_2 feature: 260476081: [\*][N+](=O)[O-]

## Feature Contribution

### Top features for positive contribution

| Fingerprint | Bit/Smiles | Feature Structure | Score |
|-------------|------------|-------------------|-------|
|             |            |                   |       |

|                                        |             |                                                                                                                                               |        |
|----------------------------------------|-------------|-----------------------------------------------------------------------------------------------------------------------------------------------|--------|
| FCFP_2                                 | -1143715940 | 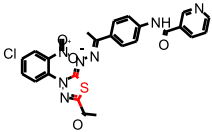<br><chem>[*]C1=[*][*]C(=[*])S1</chem>                     | 0.095  |
| FCFP_2                                 | 3           | <br><chem>[*]N[*]</chem>                                   | 0.0737 |
| FCFP_2                                 | 332760439   | <br><chem>[*]N([*])[c](:[cH]:[*]<br/>):[c]([*]):[*]</chem> | 0.0611 |
| Top Features for negative contribution |             |                                                                                                                                               |        |
| Fingerprint                            | Bit/Smiles  | Feature Structure                                                                                                                             | Score  |
| FCFP_2                                 | 71476542    | <br><chem>[*]:[c](:[*])Cl</chem>                         | -0.134 |
| FCFP_2                                 | 1872154524  | <br><chem>[*]C(=O)[*]</chem>                             | -0.105 |



|        |           |                                                                                                                                                                              |         |
|--------|-----------|------------------------------------------------------------------------------------------------------------------------------------------------------------------------------|---------|
| FCFP_2 | 203677720 | 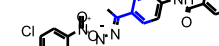 <chem>[*]C(=O)N1C(=N2C(=C1)N(C2)S(=O)(=O)CC)C3=CC=C(C=C3)N1C(=C2)N(C1)S(=O)(=O)CC</chem> | -0.0829 |
|--------|-----------|------------------------------------------------------------------------------------------------------------------------------------------------------------------------------|---------|

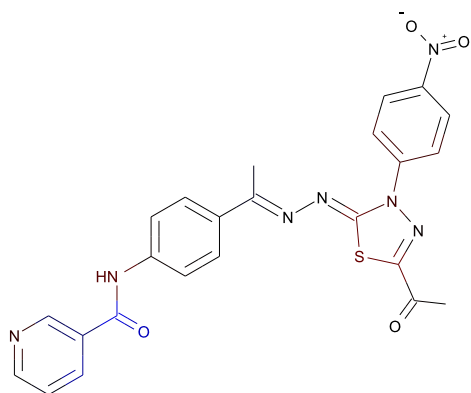
$$\text{C}_{24}\text{H}_{19}\text{N}_7\text{O}_4\text{S}$$

Molecular Weight: 501.51715

ALogP: 3.488

Rotatable Bonds: 7

Acceptors: 10

Donors: 1

## Model Prediction

Prediction: 0.0307

Unit: g/kg\_body\_weight

Mahalanobis Distance: 11.1

Mahalanobis Distance p-value: 5.08e-007

**Mahalanobis Distance:** The Mahalanobis distance (MD) is a generalization of the Euclidean distance that accounts for correlations among the X properties. It is calculated as the distance to the center of the training data. The larger the MD, the less trustworthy the prediction.

Mahalanobis Distance p-value: The p-value gives the fraction of training data with an MD greater than or equal to the one for the given sample, assuming normally distributed data. The smaller the p-value, the less trustworthy the prediction. For highly non-normal X properties (e.g., fingerprints), the MD p-value is wildly inaccurate.

## Structural Similar Compounds

| Name                        | C.I.PIGMENT RED 23                                                                  | SALICYLAZOSULFAPYRIDINE                                                             | RESERPINE                                                                           |
|-----------------------------|-------------------------------------------------------------------------------------|-------------------------------------------------------------------------------------|-------------------------------------------------------------------------------------|
| Structure                   | 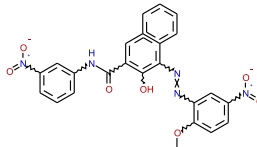 |  |  |
| Actual Endpoint (-log C)    | 2.30052                                                                             | 3.375                                                                               | 6.13118                                                                             |
| Predicted Endpoint (-log C) | 3.55333                                                                             | 2.80292                                                                             | 4.38304                                                                             |
| Distance                    | 0.686                                                                               | 0.723                                                                               | 0.825                                                                               |
| Reference                   | NCI/NTP TR-411                                                                      | NCI/NTP TR-457                                                                      | NCI/NTP TR-193                                                                      |

## Model Applicability

Unknown features are fingerprint features in the query molecule, but not found or appearing too infrequently in the training set.

1. All properties and OPS components are within expected ranges.
2. Unknown FCFP\_2 feature: 8: [\*][N+](=[\*])[\*]
3. Unknown FCFP\_2 feature: 5: [\*][O-]
4. Unknown FCFP\_2 feature: -828984032: [\*][c](:[\*]);[c](:[cH]);[\*])[N+](=[\*])[\*]
5. Unknown FCFP\_2 feature: -1338588315: [\*]:[c](:[\*])[N+](=O)[O-]
6. Unknown FCFP\_2 feature: 1872392852: [\*][N+](=O)[\*]
7. Unknown FCFP\_2 feature: 260476081: [\*][N+](=[\*])[O-]

## Feature Contribution

### Top features for positive contribution

| Fingerprint | Bit/Smiles | Feature Structure | Score |
|-------------|------------|-------------------|-------|
|             |            |                   |       |

|                                        |             |                                                                                                                                          |         |
|----------------------------------------|-------------|------------------------------------------------------------------------------------------------------------------------------------------|---------|
| FCFP_2                                 | -1143715940 | 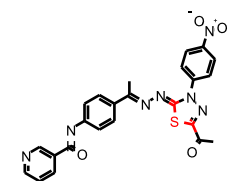<br><chem>[*]C1=[*][*]C(=[*])S1</chem>                | 0.095   |
| FCFP_2                                 | 3           | <br><chem>[*]N[*]</chem>                              | 0.0737  |
| FCFP_2                                 | 332760439   | <br><chem>[*]N([*])[c](:[cH]:[*]):[c]([*]):[*]</chem> | 0.0611  |
| Top Features for negative contribution |             |                                                                                                                                          |         |
| Fingerprint                            | Bit/Smiles  | Feature Structure                                                                                                                        | Score   |
| FCFP_2                                 | 1872154524  | <br><chem>[*]C(=O)[*]</chem>                         | -0.105  |
| FCFP_2                                 | 203677720   | <br><chem>[*]C(=[*])[c](:[cH]:[*]):[cH]:[*]</chem>  | -0.0829 |

|        |   |                                                                                                  |         |
|--------|---|--------------------------------------------------------------------------------------------------|---------|
| FCFP_2 | 1 | 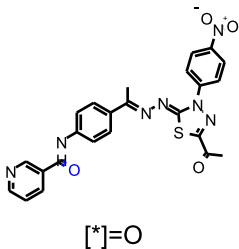 <p>[*]=O</p> | -0.0796 |
|--------|---|--------------------------------------------------------------------------------------------------|---------|

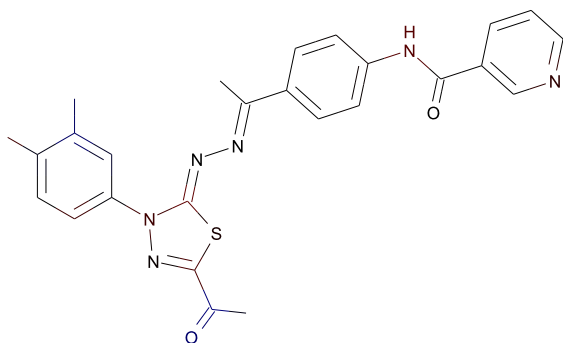

$C_{26}H_{24}N_6O_2S$

Molecular Weight: 484.57275

ALogP: 4.566

Rotatable Bonds: 6

Acceptors: 8

Donors: 1

## Model Prediction

Prediction: 0.0326

Unit: g/kg\_body\_weight

Mahalanobis Distance: 10.3

Mahalanobis Distance p-value: 1.22e-005

Mahalanobis Distance: The Mahalanobis distance (MD) is a generalization of the Euclidean distance that accounts for correlations among the X properties. It is calculated as the distance to the center of the training data. The larger the MD, the less trustworthy the prediction.

Mahalanobis Distance p-value: The p-value gives the fraction of training data with an MD greater than or equal to the one for the given sample, assuming normally distributed data. The smaller the p-value, the less trustworthy the prediction. For highly non-normal X properties (e.g., fingerprints), the MD p-value is wildly inaccurate.

## Structural Similar Compounds

| Name                        | SALICYLAZOSULFAPYRIDINE | RESERPINE      | C.I.PIGMENT RED 23 |
|-----------------------------|-------------------------|----------------|--------------------|
| Structure                   |                         |                |                    |
| Actual Endpoint (-log C)    | 3.375                   | 6.13118        | 2.30052            |
| Predicted Endpoint (-log C) | 2.80292                 | 4.38304        | 3.55333            |
| Distance                    | 0.720                   | 0.735          | 0.795              |
| Reference                   | NCI/NTP TR-457          | NCI/NTP TR-193 | NCI/NTP TR-411     |

## Model Applicability

Unknown features are fingerprint features in the query molecule, but not found or appearing too infrequently in the training set.

1. All properties and OPS components are within expected ranges.

## Feature Contribution

### Top features for positive contribution

| Fingerprint | Bit/Smiles  | Feature Structure                      | Score |
|-------------|-------------|----------------------------------------|-------|
| FCFP_2      | -1143715940 | <br><chem>[*]C1=[*][*]C(=[*])S1</chem> | 0.095 |

|                                        |            |                                                                                                                                |         |
|----------------------------------------|------------|--------------------------------------------------------------------------------------------------------------------------------|---------|
| FCFP_2                                 | 3          | 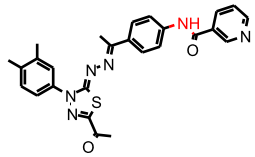<br>[*]N[*]                                 | 0.0737  |
| FCFP_2                                 | 136120670  | <br>[*]:[c](:[*])C                          | 0.064   |
| Top Features for negative contribution |            |                                                                                                                                |         |
| Fingerprint                            | Bit/Smiles | Feature Structure                                                                                                              | Score   |
| FCFP_2                                 | 1872154524 | <br>[*]C(=O)[*]                             | -0.105  |
| FCFP_2                                 | 203677720  | <br>[*]C(=[*])[c](:[cH]:[<br>*]):[cH]:[*] | -0.0829 |
| FCFP_2                                 | 1          | <br>[*]=O                                 | -0.0796 |



# Sorafenib

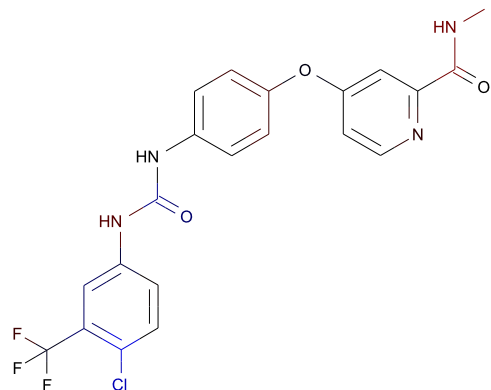

$C_{21}H_{16}ClF_3N_4O_3$

Molecular Weight: 464.82494

ALogP: 4.175

Rotatable Bonds: 6

Acceptors: 4

Donors: 3

## Model Prediction

Prediction: 0.0885

Unit: g/kg\_body\_weight

Mahalanobis Distance: 12.4

Mahalanobis Distance p-value: 1.76e-009

Mahalanobis Distance: The Mahalanobis distance (MD) is a generalization of the Euclidean distance that accounts for correlations among the X properties. It is calculated as the distance to the center of the training data. The larger the MD, the less trustworthy the prediction.

Mahalanobis Distance p-value: The p-value gives the fraction of training data with an MD greater than or equal to the one for the given sample, assuming normally distributed data. The smaller the p-value, the less trustworthy the prediction. For highly non-normal X properties (e.g., fingerprints), the MD p-value is wildly inaccurate.

# TOPKAT\_Rat\_Maximum\_Tolerated\_Dose\_Feed

## Structural Similar Compounds

| Name                        | FUROSEMIDE     | PHENOLPHTHALEIN | DISPERSE YELLOW 3 |
|-----------------------------|----------------|-----------------|-------------------|
| Structure                   |                |                 |                   |
| Actual Endpoint (-log C)    | 4.04236        | 2.20184         | 2.77703           |
| Predicted Endpoint (-log C) | 2.8614         | 2.8857          | 2.80195           |
| Distance                    | 0.741          | 0.780           | 0.799             |
| Reference                   | NCI/NTP TR-356 | NCI/NTP TR-465  | NCI/NTP TR-222    |

## Model Applicability

Unknown features are fingerprint features in the query molecule, but not found or appearing too infrequently in the training set.

1. All properties and OPS components are within expected ranges.

## Feature Contribution

### Top features for positive contribution

| Fingerprint | Bit/Smiles | Feature Structure | Score |
|-------------|------------|-------------------|-------|
| FCFP_2      | -885550502 | <br>[*]C(=[*])NC  | 0.115 |



|                                        |            |                                                                                                                                          |         |
|----------------------------------------|------------|------------------------------------------------------------------------------------------------------------------------------------------|---------|
| FCFP_2                                 | 3          | 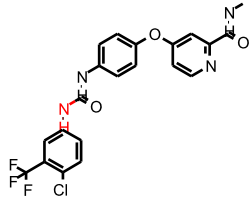<br><chem>[*]N[*]</chem>                              | 0.0737  |
| FCFP_2                                 | 332760439  | <br><chem>[*]N([*])[c](:[cH]:[*]):[c]([*]):[*]</chem> | 0.0611  |
| Top Features for negative contribution |            |                                                                                                                                          |         |
| Fingerprint                            | Bit/Smiles | Feature Structure                                                                                                                        | Score   |
| FCFP_2                                 | 71476542   | <br><chem>[*]:[c](:[*])Cl</chem>                      | -0.134  |
| FCFP_2                                 | 1872154524 | <br><chem>[*]C(=O)[*]</chem>                        | -0.105  |
| FCFP_2                                 | 203677720  | <br><chem>[*]C(=[*])[c](:[cH]:[*]):[cH]:[*]</chem>  | -0.0829 |



7a

## TOPKAT\_Rat\_Maximum\_Tolerated\_Dose\_Gavage

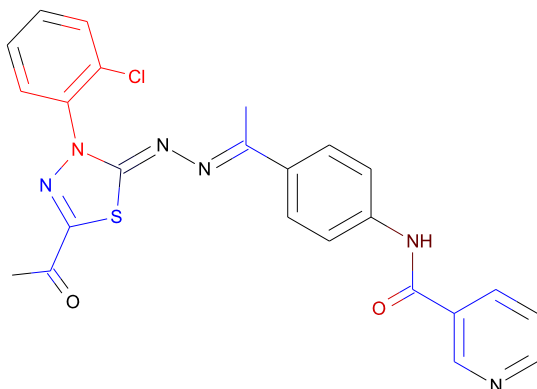C<sub>24</sub>H<sub>19</sub>ClN<sub>6</sub>O<sub>2</sub>S

Molecular Weight: 490.96466

ALogP: 4.258

Rotatable Bonds: 6

Acceptors: 8

Donors: 1

**Model Prediction**

Prediction: 5.39e-005

Unit: g/kg\_body\_weight

Mahalanobis Distance: 10.2

Mahalanobis Distance p-value: 2.67e-006

Mahalanobis Distance: The Mahalanobis distance (MD) is a generalization of the Euclidean distance that accounts for correlations among the X properties. It is calculated as the distance to the center of the training data. The larger the MD, the less trustworthy the prediction.

Mahalanobis Distance p-value: The p-value gives the fraction of training data with an MD greater than or equal to the one for the given sample, assuming normally distributed data. The smaller the p-value, the less trustworthy the prediction. For highly non-normal X properties (e.g., fingerprints), the MD p-value is wildly inaccurate.

**Structural Similar Compounds**

| Name                        | OCHRATOXIN     | PENICILLIN VK  | SULFISOOXAZOLE |
|-----------------------------|----------------|----------------|----------------|
| Structure                   |                |                |                |
| Actual Endpoint (-log C)    | 6.28396        | 2.54455        | 2.82494        |
| Predicted Endpoint (-log C) | 5.12358        | 3.9702         | 3.0705         |
| Distance                    | 0.917          | 1.129          | 1.178          |
| Reference                   | NCI/NTP TR-358 | NCI/NTP TR-336 | NCI/NTP TR-138 |

**Model Applicability**

Unknown features are fingerprint features in the query molecule, but not found or appearing too infrequently in the training set.

1. Molecular\_Weight out of range. Value: 490.96. Training min, max, mean, SD: 68.074, 434.63, 171.13, 85.06.
2. Num\_H\_Acceptors out of range. Value: 8. Training min, max, mean, SD: 0, 6, 1.6146, 1.644.
3. Num\_AromaticRings out of range. Value: 3. Training min, max, mean, SD: 0, 2, 0.5625, 0.693.
4. OPS PC5 out of range. Value: -3.7095. Training min, max, SD, explained variance: -3.4, 4.1587, 1.489, 0.0686.
5. OPS PC10 out of range. Value: 2.9353. Training min, max, SD, explained variance: -3.9696, 2.3971, 0.982, 0.0298.
6. Unknown FCFP\_2 feature: -1549192822: [\*]N=C(/C)\[c](:[\*]):[\*]
7. Unknown FCFP\_2 feature: 580960234: [\*]C(=NN=[\*])[\*]
8. Unknown FCFP\_2 feature: -1986158408: [\*]N=C\1/S[\*]=[\*]N1[\*]

**Feature Contribution****Top features for positive contribution**

| Fingerprint | Bit/Smiles | Feature Structure | Score |
|-------------|------------|-------------------|-------|
|             |            |                   |       |

|                                        |            |                                                                                                                                          |        |
|----------------------------------------|------------|------------------------------------------------------------------------------------------------------------------------------------------|--------|
| FCFP_2                                 | 332760439  | 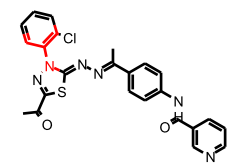<br><chem>[*]N([*])[c](:[cH]:[*]):[c]([*]):[*]</chem> | 0.672  |
| FCFP_2                                 | 32         | <br><chem>[*]Cl</chem>                                | 0.526  |
| FCFP_2                                 | 1          | <br><chem>[*]=O</chem>                                | 0.511  |
| Top Features for negative contribution |            |                                                                                                                                          |        |
| Fingerprint                            | Bit/Smiles | Feature Structure                                                                                                                        | Score  |
| FCFP_2                                 | 136597326  | <br><chem>[*]C(=[*])C</chem>                        | -0.489 |
| FCFP_2                                 | 203677720  | <br><chem>[*]C(=[*])[c](:[cH]:[*]):[cH]:[*]</chem>  | -0.406 |

|        |           |                                                                                                                                                       |        |
|--------|-----------|-------------------------------------------------------------------------------------------------------------------------------------------------------|--------|
| FCFP_2 | 565998553 | 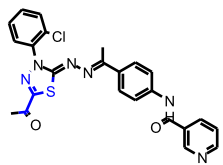 <p data-bbox="1386 292 1522 332">[*]C(=[*])C1=N[*]"[*]S<br/>1</p> | -0.348 |
|--------|-----------|-------------------------------------------------------------------------------------------------------------------------------------------------------|--------|

7b

TOPKAT\_Rat\_Maximum\_Tolerated\_Dose\_Gavage

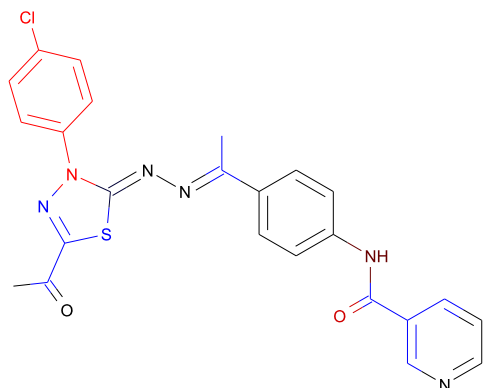C<sub>24</sub>H<sub>19</sub>ClN<sub>6</sub>O<sub>2</sub>S

Molecular Weight: 490.96465

ALogP: 4.258

Rotatable Bonds: 6

Acceptors: 8

Donors: 1

### Model Prediction

Prediction: 5.39e-005

Unit: g/kg\_body\_weight

Mahalanobis Distance: 10.2

Mahalanobis Distance p-value: 2.67e-006

Mahalanobis Distance: The Mahalanobis distance (MD) is a generalization of the Euclidean distance that accounts for correlations among the X properties. It is calculated as the distance to the center of the training data. The larger the MD, the less trustworthy the prediction.

Mahalanobis Distance p-value: The p-value gives the fraction of training data with an MD greater than or equal to the one for the given sample, assuming normally distributed data. The smaller the p-value, the less trustworthy the prediction. For highly non-normal X properties (e.g., fingerprints), the MD p-value is wildly inaccurate.

### Structural Similar Compounds

| Name                        | OCHRATOXIN     | PENICILLIN VK  | SULFISOOXAZOLE |
|-----------------------------|----------------|----------------|----------------|
| Structure                   |                |                |                |
| Actual Endpoint (-log C)    | 6.28396        | 2.54455        | 2.82494        |
| Predicted Endpoint (-log C) | 5.12358        | 3.9702         | 3.0705         |
| Distance                    | 0.917          | 1.129          | 1.178          |
| Reference                   | NCI/NTP TR-358 | NCI/NTP TR-336 | NCI/NTP TR-138 |

### Model Applicability

Unknown features are fingerprint features in the query molecule, but not found or appearing too infrequently in the training set.

1. Molecular\_Weight out of range. Value: 490.96. Training min, max, mean, SD: 68.074, 434.63, 171.13, 85.06.
2. Num\_H\_Acceptors out of range. Value: 8. Training min, max, mean, SD: 0, 6, 1.6146, 1.644.
3. Num\_AromaticRings out of range. Value: 3. Training min, max, mean, SD: 0, 2, 0.5625, 0.693.
4. OPS PC5 out of range. Value: -3.7095. Training min, max, SD, explained variance: -3.4, 4.1587, 1.489, 0.0686.
5. OPS PC10 out of range. Value: 2.9353. Training min, max, SD, explained variance: -3.9696, 2.3971, 0.982, 0.0298.
6. Unknown FCFP\_2 feature: -1549192822: [\*]N=C(/C)\[c](:[\*]):[\*]
7. Unknown FCFP\_2 feature: 580960234: [\*]C(=NN=[\*])[\*]
8. Unknown FCFP\_2 feature: -1986158408: [\*]N=C\1/S[\*]=[\*]N1[\*]

### Feature Contribution

#### Top features for positive contribution

| Fingerprint | Bit/Smiles | Feature Structure | Score |
|-------------|------------|-------------------|-------|
|             |            |                   |       |

|                                        |            |                                                                                                                                          |        |
|----------------------------------------|------------|------------------------------------------------------------------------------------------------------------------------------------------|--------|
| FCFP_2                                 | 332760439  | 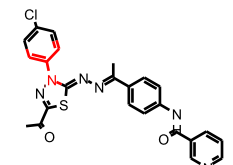<br><chem>[*]N([*])[c](:[cH]:[*]):[c]([*]):[*]</chem> | 0.672  |
| FCFP_2                                 | 32         | <br><chem>[*]Cl</chem>                                | 0.526  |
| FCFP_2                                 | 1          | <br><chem>[*]=O</chem>                                | 0.511  |
| Top Features for negative contribution |            |                                                                                                                                          |        |
| Fingerprint                            | Bit/Smiles | Feature Structure                                                                                                                        | Score  |
| FCFP_2                                 | 136597326  | <br><chem>[*]C(=[*])C</chem>                        | -0.489 |
| FCFP_2                                 | 203677720  | <br><chem>[*]C(=[*])[c](:[cH]:[*]):[cH]:[*]</chem>  | -0.406 |

|        |           |                                                                                                                         |        |
|--------|-----------|-------------------------------------------------------------------------------------------------------------------------|--------|
| FCFP_2 | 565998553 | 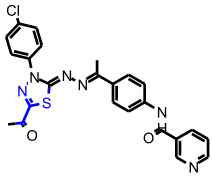<br><chem>[*]C(=[*])C1=N[*]S1</chem> | -0.348 |
|--------|-----------|-------------------------------------------------------------------------------------------------------------------------|--------|



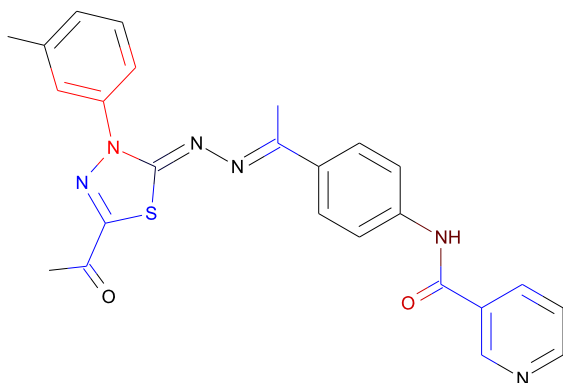

$C_{25}H_{22}N_6O_2S$

Molecular Weight: 470.54617

ALogP: 4.08

Rotatable Bonds: 6

Acceptors: 8

Donors: 1

## Model Prediction

Prediction: 0.000513

Unit: g/kg\_body\_weight

Mahalanobis Distance: 11.6

Mahalanobis Distance p-value: 3.18e-008

Mahalanobis Distance: The Mahalanobis distance (MD) is a generalization of the Euclidean distance that accounts for correlations among the X properties. It is calculated as the distance to the center of the training data. The larger the MD, the less trustworthy the prediction.

Mahalanobis Distance p-value: The p-value gives the fraction of training data with an MD greater than or equal to the one for the given sample, assuming normally distributed data. The smaller the p-value, the less trustworthy the prediction. For highly non-normal X properties (e.g., fingerprints), the MD p-value is wildly inaccurate.

## Structural Similar Compounds

| Name                        | OCHRATOXIN     | PENICILLIN VK  | SULFISOOXAZOLE |
|-----------------------------|----------------|----------------|----------------|
| Structure                   |                |                |                |
| Actual Endpoint (-log C)    | 6.28396        | 2.54455        | 2.82494        |
| Predicted Endpoint (-log C) | 5.12358        | 3.9702         | 3.0705         |
| Distance                    | 0.949          | 1.097          | 1.112          |
| Reference                   | NCI/NTP TR-358 | NCI/NTP TR-336 | NCI/NTP TR-138 |

## Model Applicability

Unknown features are fingerprint features in the query molecule, but not found or appearing too infrequently in the training set.

1. Molecular\_Weight out of range. Value: 470.55. Training min, max, mean, SD: 68.074, 434.63, 171.13, 85.06.
2. Num\_H\_Acceptors out of range. Value: 8. Training min, max, mean, SD: 0, 6, 1.6146, 1.644.
3. Num\_AromaticRings out of range. Value: 3. Training min, max, mean, SD: 0, 2, 0.5625, 0.693.
4. OPS\_PC6 out of range. Value: -3.1418. Training min, max, SD, explained variance: -2.4321, 2.9885, 1.256, 0.0488.
5. Unknown FCFP\_2 feature: -1549192822: [\*]\N=C(/C)\[c](:[\*]):[\*]
6. Unknown FCFP\_2 feature: 580960234: [\*]C(=NN=[\*])[\*]
7. Unknown FCFP\_2 feature: -1986158408: [\*]\N=C\1/S[\*]=[\*]N1[\*]

## Feature Contribution

### Top features for positive contribution

| Fingerprint | Bit/Smiles | Feature Structure | Score |
|-------------|------------|-------------------|-------|
|             |            |                   |       |

|                                        |            |                                                                                                                                          |        |
|----------------------------------------|------------|------------------------------------------------------------------------------------------------------------------------------------------|--------|
| FCFP_2                                 | 332760439  | 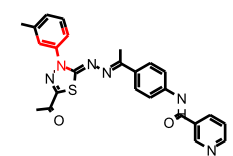<br><chem>[*]N([*])[c](:[cH]:[*]:[c]([*]):[*])</chem> | 0.672  |
| FCFP_2                                 | 1          | <br><chem>[*]=O</chem>                                | 0.511  |
| FCFP_2                                 | 3          | <br><chem>[*]N[*]</chem>                              | 0.104  |
| Top Features for negative contribution |            |                                                                                                                                          |        |
| Fingerprint                            | Bit/Smiles | Feature Structure                                                                                                                        | Score  |
| FCFP_2                                 | 136597326  | <br><chem>[*]C(=[*])C</chem>                         | -0.489 |
| FCFP_2                                 | 203677720  | <br><chem>[*]C(=[*])[c](:[cH]:[*]):[cH]:[*]</chem>  | -0.406 |

|        |           |                                                                                                                                                       |        |
|--------|-----------|-------------------------------------------------------------------------------------------------------------------------------------------------------|--------|
| FCFP_2 | 565998553 | 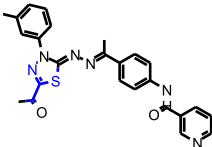 <p data-bbox="1386 292 1522 332">[*]C(=[*])C1=N[*]][*]S<br/>1</p> | -0.348 |
|--------|-----------|-------------------------------------------------------------------------------------------------------------------------------------------------------|--------|

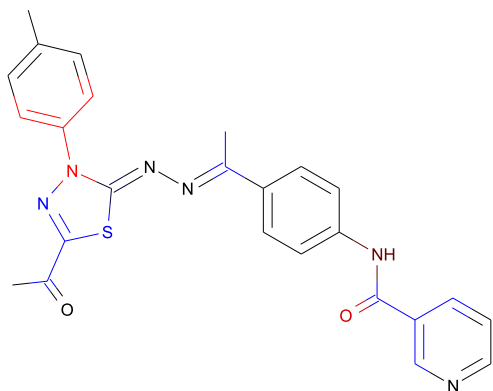

$C_{25}H_{22}N_6O_2S$

Molecular Weight: 470.54617

ALogP: 4.08

Rotatable Bonds: 6

Acceptors: 8

Donors: 1

## Model Prediction

Prediction: 0.000513

Unit: g/kg\_body\_weight

Mahalanobis Distance: 11.6

Mahalanobis Distance p-value: 3.18e-008

Mahalanobis Distance: The Mahalanobis distance (MD) is a generalization of the Euclidean distance that accounts for correlations among the X properties. It is calculated as the distance to the center of the training data. The larger the MD, the less trustworthy the prediction.

Mahalanobis Distance p-value: The p-value gives the fraction of training data with an MD greater than or equal to the one for the given sample, assuming normally distributed data. The smaller the p-value, the less trustworthy the prediction. For highly non-normal X properties (e.g., fingerprints), the MD p-value is wildly inaccurate.

## Structural Similar Compounds

| Name                        | OCHRATOXIN     | PENICILLIN VK  | SULFISOOXAZOLE |
|-----------------------------|----------------|----------------|----------------|
| Structure                   |                |                |                |
| Actual Endpoint (-log C)    | 6.28396        | 2.54455        | 2.82494        |
| Predicted Endpoint (-log C) | 5.12358        | 3.9702         | 3.0705         |
| Distance                    | 0.949          | 1.097          | 1.112          |
| Reference                   | NCI/NTP TR-358 | NCI/NTP TR-336 | NCI/NTP TR-138 |

## Model Applicability

Unknown features are fingerprint features in the query molecule, but not found or appearing too infrequently in the training set.

1. Molecular\_Weight out of range. Value: 470.55. Training min, max, mean, SD: 68.074, 434.63, 171.13, 85.06.
2. Num\_H\_Acceptors out of range. Value: 8. Training min, max, mean, SD: 0, 6, 1.6146, 1.644.
3. Num\_AromaticRings out of range. Value: 3. Training min, max, mean, SD: 0, 2, 0.5625, 0.693.
4. OPS PC6 out of range. Value: -3.1418. Training min, max, SD, explained variance: -2.4321, 2.9885, 1.256, 0.0488.
5. Unknown FCFP\_2 feature: -1549192822: [\*]\N=C(/C)\[c](:[\*]):[\*]
6. Unknown FCFP\_2 feature: 580960234: [\*]C(=NN=[\*])[\*]
7. Unknown FCFP\_2 feature: -1986158408: [\*]\N=C\1/S[\*]=[\*]N1[\*]

## Feature Contribution

### Top features for positive contribution

| Fingerprint | Bit/Smiles | Feature Structure | Score |
|-------------|------------|-------------------|-------|
|             |            |                   |       |

|                                        |            |                                                                                                                                          |        |
|----------------------------------------|------------|------------------------------------------------------------------------------------------------------------------------------------------|--------|
| FCFP_2                                 | 332760439  | 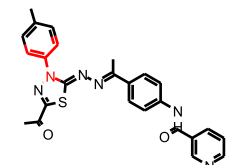<br><chem>[*]N([*])[c](:[cH]:[*]:[c]([*]):[*])</chem> | 0.672  |
| FCFP_2                                 | 1          | <br><chem>[*]=O</chem>                                | 0.511  |
| FCFP_2                                 | 3          | <br><chem>[*]N[*]</chem>                              | 0.104  |
| Top Features for negative contribution |            |                                                                                                                                          |        |
| Fingerprint                            | Bit/Smiles | Feature Structure                                                                                                                        | Score  |
| FCFP_2                                 | 136597326  | <br><chem>[*]C(=[*])C</chem>                         | -0.489 |
| FCFP_2                                 | 203677720  | <br><chem>[*]C(=[*])[c](:[cH]:[*]:[cH]:[*])</chem>  | -0.406 |

|        |           |                                                                                                                                                   |        |
|--------|-----------|---------------------------------------------------------------------------------------------------------------------------------------------------|--------|
| FCFP_2 | 565998553 | 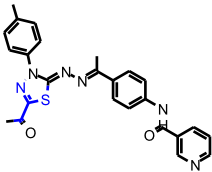 <p data-bbox="1386 300 1522 332">[*]C(=[*])C1=N[*]S<br/>1</p> | -0.348 |
|--------|-----------|---------------------------------------------------------------------------------------------------------------------------------------------------|--------|

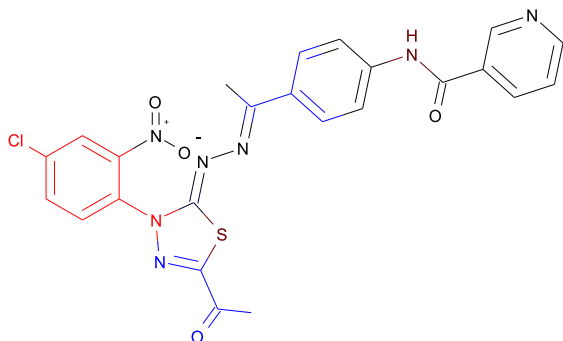

$C_{24}H_{18}ClN_7O_4S$

Molecular Weight: 535.96222

ALogP: 4.153

Rotatable Bonds: 7

Acceptors: 10

Donors: 1

## Model Prediction

Prediction: 1.61e-005

Unit: g/kg\_body\_weight

Mahalanobis Distance: 12.9

Mahalanobis Distance p-value: 5.2e-010

Mahalanobis Distance: The Mahalanobis distance (MD) is a generalization of the Euclidean distance that accounts for correlations among the X properties. It is calculated as the distance to the center of the training data. The larger the MD, the less trustworthy the prediction.

Mahalanobis Distance p-value: The p-value gives the fraction of training data with an MD greater than or equal to the one for the given sample, assuming normally distributed data. The smaller the p-value, the less trustworthy the prediction. For highly non-normal X properties (e.g., fingerprints), the MD p-value is wildly inaccurate.

## Structural Similar Compounds

| Name                        | OCHRATOXIN     | PENICILLIN VK  | SULFISOOXAZOLE |
|-----------------------------|----------------|----------------|----------------|
| Structure                   |                |                |                |
| Actual Endpoint (-log C)    | 6.28396        | 2.54455        | 2.82494        |
| Predicted Endpoint (-log C) | 5.12358        | 3.9702         | 3.0705         |
| Distance                    | 1.148          | 1.323          | 1.451          |
| Reference                   | NCI/NTP TR-358 | NCI/NTP TR-336 | NCI/NTP TR-138 |

## Model Applicability

Unknown features are fingerprint features in the query molecule, but not found or appearing too infrequently in the training set.

1. Molecular\_Weight out of range. Value: 535.96. Training min, max, mean, SD: 68.074, 434.63, 171.13, 85.06.
2. Num\_H\_Acceptors out of range. Value: 10. Training min, max, mean, SD: 0, 6, 1.6146, 1.644.
3. Num\_AromaticRings out of range. Value: 3. Training min, max, mean, SD: 0, 2, 0.5625, 0.693.
4. Molecular\_PolarSurfaceArea out of range. Value: 170.49. Training min, max, mean, SD: 0, 138.03, 28.978, 32.1.
5. OPS PC1 out of range. Value: 8.2287. Training min, max, SD, explained variance: -4.0008, 7.9165, 2.861, 0.2531.
6. OPS PC5 out of range. Value: -4.3335. Training min, max, SD, explained variance: -3.4, 4.1587, 1.489, 0.0686.
7. OPS PC10 out of range. Value: 2.7221. Training min, max, SD, explained variance: -3.9696, 2.3971, 0.982, 0.0298.
8. Unknown FCFP\_2 feature: 8: [\*][N+](=\*)[\*]
9. Unknown FCFP\_2 feature: 5: [\*][O-]
10. Unknown FCFP\_2 feature: 580960234: [\*]C(=NN=\*)[\*]
11. Unknown FCFP\_2 feature: -1986158408: [\*]N=C\1/S[\*]=[\*]N1[\*]
12. Unknown FCFP\_2 feature: -828984032: [\*][c](:[\*]):[c](:[cH]:[\*])[N+](=\*)[\*]
13. Unknown FCFP\_2 feature: -1549192822: [\*]N=C(/C)\[c](:[\*]):[\*]
14. Unknown FCFP\_2 feature: -1338588315: [\*]:[c](:[\*])[N+](=O)[O-]
15. Unknown FCFP\_2 feature: 1872392852: [\*][N+](=O)[\*]
16. Unknown FCFP\_2 feature: 260476081: [\*][N+](=\*)[O-]

## Feature Contribution

| Top features for positive contribution |            |                                                                                                                                 |        |
|----------------------------------------|------------|---------------------------------------------------------------------------------------------------------------------------------|--------|
| Fingerprint                            | Bit/Smiles | Feature Structure                                                                                                               | Score  |
| FCFP_2                                 | 332760439  | 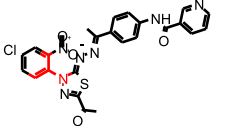<br>[*]N([*])[c](:[cH]:[*]<br>):[c]([*]):[*] | 0.672  |
| FCFP_2                                 | 32         | <br>[*]Cl                                    | 0.526  |
| FCFP_2                                 | 1          | <br>[*]=O                                    | 0.511  |
| Top Features for negative contribution |            |                                                                                                                                 |        |
| Fingerprint                            | Bit/Smiles | Feature Structure                                                                                                               | Score  |
| FCFP_2                                 | 136597326  | <br>[*]C(=[*])C                            | -0.489 |
|                                        |            |                                                                                                                                 |        |



|        |           |                                                                                                                          |        |
|--------|-----------|--------------------------------------------------------------------------------------------------------------------------|--------|
| FCFP_2 | 203677720 | 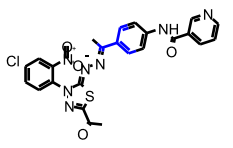<br>[*]C(=[*])[c](:[cH]:[*]):[cH]:[*] | -0.406 |
| FCFP_2 | 565998553 | <br>[*]C(=[*])C1=N[*]][*]S<br>1       | -0.348 |

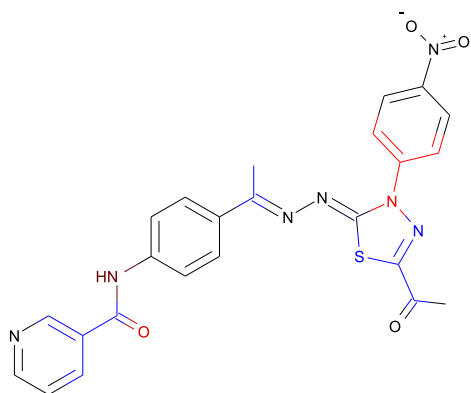

$C_{24}H_{19}N_7O_4S$

Molecular Weight: 501.51715

ALogP: 3.488

Rotatable Bonds: 7

Acceptors: 10

Donors: 1

## Model Prediction

Prediction: 0.000203

Unit: g/kg\_body\_weight

Mahalanobis Distance: 13.1

Mahalanobis Distance p-value: 2.65e-010

Mahalanobis Distance: The Mahalanobis distance (MD) is a generalization of the Euclidean distance that accounts for correlations among the X properties. It is calculated as the distance to the center of the training data. The larger the MD, the less trustworthy the prediction.

Mahalanobis Distance p-value: The p-value gives the fraction of training data with an MD greater than or equal to the one for the given sample, assuming normally distributed data. The smaller the p-value, the less trustworthy the prediction. For highly non-normal X properties (e.g., fingerprints), the MD p-value is wildly inaccurate.

## Structural Similar Compounds

| Name                        | OCHRATOXIN     | PENICILLIN VK  | SULFISOOXAZOLE |
|-----------------------------|----------------|----------------|----------------|
| Structure                   |                |                |                |
| Actual Endpoint (-log C)    | 6.28396        | 2.54455        | 2.82494        |
| Predicted Endpoint (-log C) | 5.12358        | 3.9702         | 3.0705         |
| Distance                    | 1.158          | 1.261          | 1.381          |
| Reference                   | NCI/NTP TR-358 | NCI/NTP TR-336 | NCI/NTP TR-138 |

## Model Applicability

Unknown features are fingerprint features in the query molecule, but not found or appearing too infrequently in the training set.

1. Molecular\_Weight out of range. Value: 501.52. Training min, max, mean, SD: 68.074, 434.63, 171.13, 85.06.
2. Num\_H\_Acceptors out of range. Value: 10. Training min, max, mean, SD: 0, 6, 1.6146, 1.644.
3. Num\_AromaticRings out of range. Value: 3. Training min, max, mean, SD: 0, 2, 0.5625, 0.693.
4. Molecular\_PolarSurfaceArea out of range. Value: 170.49. Training min, max, mean, SD: 0, 138.03, 28.978, 32.1.
5. OPS\_PC1 out of range. Value: 8.2949. Training min, max, SD, explained variance: -4.0008, 7.9165, 2.861, 0.2531.
6. OPS\_PC6 out of range. Value: -3.1571. Training min, max, SD, explained variance: -2.4321, 2.9885, 1.256, 0.0488.
7. Unknown FCFP\_2 feature: 8: [\*][N+](=[\*])[\*]
8. Unknown FCFP\_2 feature: 5: [\*][O-]
9. Unknown FCFP\_2 feature: -1549192822: [\*]N=C(/C)\[c](:[\*]):[\*]
10. Unknown FCFP\_2 feature: 580960234: [\*]C(=NN=[\*])[\*]
11. Unknown FCFP\_2 feature: -828984032: [\*][c](:[\*]):[c](:[cH]:[\*])[N+](=[\*])[\*]
12. Unknown FCFP\_2 feature: -1986158408: [\*]N=C\1/S[\*]=[\*]N1[\*]
13. Unknown FCFP\_2 feature: -1338588315: [\*]:[c](:[\*])[N+](=O)[O-]
14. Unknown FCFP\_2 feature: 1872392852: [\*][N+](=O)[\*]
15. Unknown FCFP\_2 feature: 260476081: [\*][N+](=[\*])[O-]

# Feature Contribution

| Top features for positive contribution |            |                                                                                                                                       |        |
|----------------------------------------|------------|---------------------------------------------------------------------------------------------------------------------------------------|--------|
| Fingerprint                            | Bit/Smiles | Feature Structure                                                                                                                     | Score  |
| FCFP_2                                 | 332760439  | 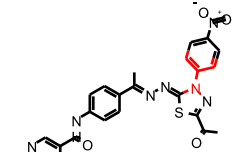 <chem>[*]N([*])[c](:[cH]:[*]):[c]([*]):[*]</chem> | 0.672  |
| FCFP_2                                 | 1          |  <chem>[*]=O</chem>                                | 0.511  |
| FCFP_2                                 | 3          |  <chem>[*]N[*]</chem>                              | 0.104  |
| Top Features for negative contribution |            |                                                                                                                                       |        |
| Fingerprint                            | Bit/Smiles | Feature Structure                                                                                                                     | Score  |
| FCFP_2                                 | 136597326  |  <chem>[*]C(=[*])C</chem>                        | -0.489 |

|        |           |                                                                                                                          |        |
|--------|-----------|--------------------------------------------------------------------------------------------------------------------------|--------|
| FCFP_2 | 203677720 | 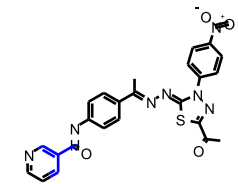<br>[*]C(=[*])[c](:[cH]:[*]):[cH]:[*] | -0.406 |
| FCFP_2 | 565998553 | <br>[*]C(=[*])C1=N[*]][*]S<br>1       | -0.348 |

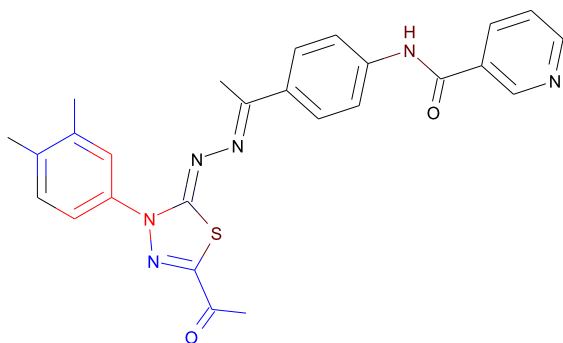

$C_{26}H_{24}N_6O_2S$

Molecular Weight: 484.57275

ALogP: 4.566

Rotatable Bonds: 6

Acceptors: 8

Donors: 1

## Model Prediction

Prediction: 0.000391

Unit: g/kg\_body\_weight

Mahalanobis Distance: 11.8

Mahalanobis Distance p-value: 1.53e-008

Mahalanobis Distance: The Mahalanobis distance (MD) is a generalization of the Euclidean distance that accounts for correlations among the X properties. It is calculated as the distance to the center of the training data. The larger the MD, the less trustworthy the prediction.

Mahalanobis Distance p-value: The p-value gives the fraction of training data with an MD greater than or equal to the one for the given sample, assuming normally distributed data. The smaller the p-value, the less trustworthy the prediction. For highly non-normal X properties (e.g., fingerprints), the MD p-value is wildly inaccurate.

## Structural Similar Compounds

| Name                        | OCHRATOXIN     | PENICILLIN VK  | SULFISOOXAZOLE |
|-----------------------------|----------------|----------------|----------------|
| Structure                   |                |                |                |
| Actual Endpoint (-log C)    | 6.28396        | 2.54455        | 2.82494        |
| Predicted Endpoint (-log C) | 5.12358        | 3.9702         | 3.0705         |
| Distance                    | 0.967          | 1.133          | 1.151          |
| Reference                   | NCI/NTP TR-358 | NCI/NTP TR-336 | NCI/NTP TR-138 |

## Model Applicability

Unknown features are fingerprint features in the query molecule, but not found or appearing too infrequently in the training set.

1. Molecular\_Weight out of range. Value: 484.57. Training min, max, mean, SD: 68.074, 434.63, 171.13, 85.06.
2. Num\_H\_Acceptors out of range. Value: 8. Training min, max, mean, SD: 0, 6, 1.6146, 1.644.
3. Num\_AromaticRings out of range. Value: 3. Training min, max, mean, SD: 0, 2, 0.5625, 0.693.
4. OPS PC6 out of range. Value: -3.2057. Training min, max, SD, explained variance: -2.4321, 2.9885, 1.256, 0.0488.
5. Unknown FCFP\_2 feature: 580960234: [\*]C(=NN=[\*])[\*]
6. Unknown FCFP\_2 feature: -1986158408: [\*]N=C\1/S[\*]=[\*]N1[\*]
7. Unknown FCFP\_2 feature: -1549192822: [\*]N=C(/C)\[c](:[\*]):[\*]

## Feature Contribution

### Top features for positive contribution

| Fingerprint | Bit/Smiles | Feature Structure | Score |
|-------------|------------|-------------------|-------|
|             |            |                   |       |

|                                        |            |                                                                                                                                               |        |
|----------------------------------------|------------|-----------------------------------------------------------------------------------------------------------------------------------------------|--------|
| FCFP_2                                 | 332760439  | 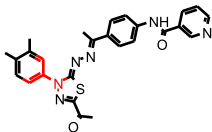<br><chem>[*]N([*])[c](:[cH]:[*]<br/>):[c]([*]):[*]</chem> | 0.672  |
| FCFP_2                                 | 1          | <br><chem>[*]=O</chem>                                     | 0.511  |
| FCFP_2                                 | 3          | <br><chem>[*]N[*]</chem>                                   | 0.104  |
| Top Features for negative contribution |            |                                                                                                                                               |        |
| Fingerprint                            | Bit/Smiles | Feature Structure                                                                                                                             | Score  |
| FCFP_2                                 | 136597326  | <br><chem>[*]C(=[*])C</chem>                             | -0.489 |
| FCFP_2                                 | 203677720  | <br><chem>[*]C(=[*])[c](:[cH]:[*]<br/>):[cH]:[*]</chem>  | -0.406 |

FCFP\_2

565998553

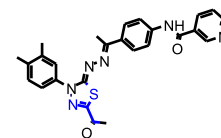

[\*]C(=[\*])C1=N[\*]][\*]S  
1

-0.348

# Sorafenib

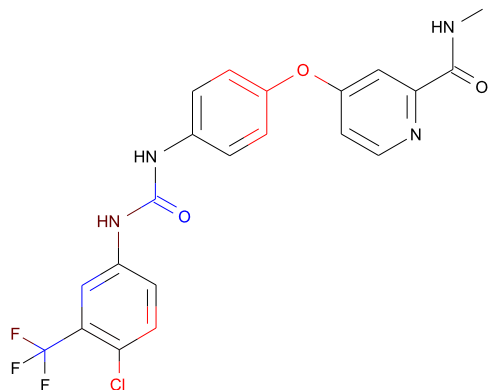
$$\text{C}_{21}\text{H}_{16}\text{ClF}_3\text{N}_4\text{O}_3$$

Molecular Weight: 464.82494

|ALogP: 4.175

Rotatable Bonds: 6

Acceptors: 4

Donors: 3

## Model Prediction

Prediction: 0.000918

Unit: g/kg\_body\_weight

Mahalanobis Distance: 12.2

Mahalanobis Distance p-value: 4.69e-009

**Mahalanobis Distance:** The Mahalanobis distance (MD) is a generalization of the Euclidean distance that accounts for correlations among the X properties. It is calculated as the distance to the center of the training data. The larger the MD, the less trustworthy the prediction.

Mahalanobis Distance p-value: The p-value gives the fraction of training data with an MD greater than or equal to the one for the given sample, assuming normally distributed data. The smaller the p-value, the less trustworthy the prediction. For highly non-normal X properties (e.g., fingerprints), the MD p-value is wildly inaccurate.

## TOPKAT\_Rat\_Maximum\_Tolerated\_Dose\_Gavage

## Structural Similar Compounds

| Name                        | OCHRATOXIN                                                                          | SULFISOOXAZOLE                                                                      | PENICILLIN VK                                                                       |
|-----------------------------|-------------------------------------------------------------------------------------|-------------------------------------------------------------------------------------|-------------------------------------------------------------------------------------|
| Structure                   | 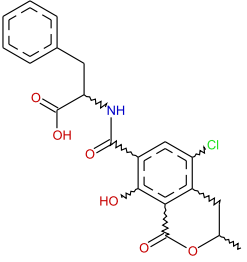 |  |  |
| Actual Endpoint (-log C)    | 6.28396                                                                             | 2.82494                                                                             | 2.54455                                                                             |
| Predicted Endpoint (-log C) | 5.12358                                                                             | 3.0705                                                                              | 3.9702                                                                              |
| Distance                    | 0.758                                                                               | 0.997                                                                               | 1.159                                                                               |
| Reference                   | NCI/NTP TR-358                                                                      | NCI/NTP TR-138                                                                      | NCI/NTP TR-336                                                                      |

## Model Applicability

Unknown features are fingerprint features in the query molecule, but not found or appearing too infrequently in the training set.

1. Molecular\_Weight out of range. Value: 464.82. Training min, max, mean, SD: 68.074, 434.63, 171.13, 85.06.
2. Num\_AromaticRings out of range. Value: 3. Training min, max, mean, SD: 0, 2, 0.5625, 0.693.
3. OPS\_PC5 out of range. Value: -3.5737. Training min, max, SD, explained variance: -3.4, 4.1587, 1.489, 0.0686.
4. OPS\_PC7 out of range. Value: -3.8342. Training min, max, SD, explained variance: -2.8003, 2.9332, 1.16, 0.0416.
5. Unknown\_FCFP\_2 feature: 1499521844: [\*]NC(=O)N[\*]
6. Unknown\_FCFP\_2 feature: -1029533685: [\*]:c(:[\*])C(F)(F)F
7. Unknown\_FCFP\_2 feature: 136686699: [\*]NC

## Feature Contribution

| Top features for positive contribution |            |                   |       |
|----------------------------------------|------------|-------------------|-------|
| Fingerprint                            | Bit/Smiles | Feature Structure | Score |
|                                        |            |                   |       |



|                                        |            |                                                                                                                                             |        |
|----------------------------------------|------------|---------------------------------------------------------------------------------------------------------------------------------------------|--------|
| FCFP_2                                 | 332760439  | 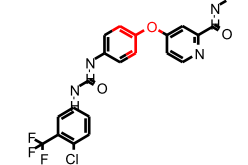<br><chem>[*]N([*])[c](:[cH]:[*])[:c]([*]):[*]</chem>    | 0.672  |
| FCFP_2                                 | 32         | <br><chem>[*]Cl</chem>                                   | 0.526  |
| FCFP_2                                 | 1          | <br><chem>[*]=O</chem>                                   | 0.511  |
| Top Features for negative contribution |            |                                                                                                                                             |        |
| Fingerprint                            | Bit/Smiles | Feature Structure                                                                                                                           | Score  |
| FCFP_2                                 | 203677720  | <br><chem>[*]C(=[*])[c](:[cH]:[*])[:c]([*]):[*]</chem> | -0.406 |
| FCFP_2                                 | 1872154524 | <br><chem>[*]C(=O)[*]</chem>                           | -0.307 |

|        |   |                                                                                                                   |       |
|--------|---|-------------------------------------------------------------------------------------------------------------------|-------|
| FCFP_2 | 0 | 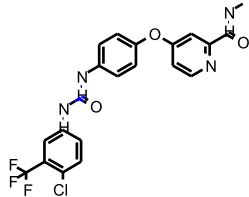<br><chem>[*]C(=[*])[*]</chem> | -0.29 |
|--------|---|-------------------------------------------------------------------------------------------------------------------|-------|

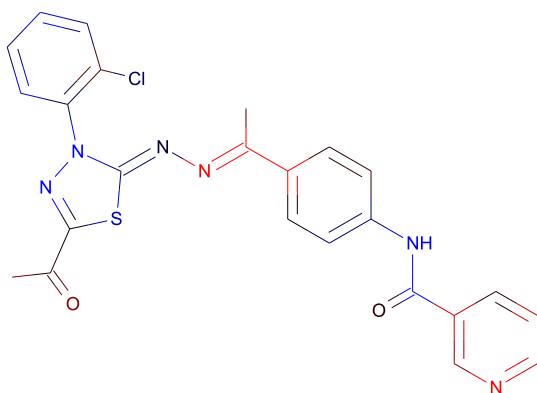

$C_{24}H_{19}ClN_6O_2S$

Molecular Weight: 490.96466

ALogP: 4.258

Rotatable Bonds: 6

Acceptors: 8

Donors: 1

## Model Prediction

Prediction: 0.531

Unit: g/kg\_body\_weight

Mahalanobis Distance: 24.4

Mahalanobis Distance p-value: 5.41e-028

Mahalanobis Distance: The Mahalanobis distance (MD) is a generalization of the Euclidean distance that accounts for correlations among the X properties. It is calculated as the distance to the center of the training data. The larger the MD, the less trustworthy the prediction.

Mahalanobis Distance p-value: The p-value gives the fraction of training data with an MD greater than or equal to the one for the given sample, assuming normally distributed data. The smaller the p-value, the less trustworthy the prediction. For highly non-normal X properties (e.g., fingerprints), the MD p-value is wildly inaccurate.

## Structural Similar Compounds

| Name                        | ACEMETACIN        | bis-OXATIN ACETATE | PRASOZIN .HCl (HCl STRIPPED) |
|-----------------------------|-------------------|--------------------|------------------------------|
| Structure                   |                   |                    |                              |
| Actual Endpoint (-log C)    | 4.235             | 1.717              | 2.294                        |
| Predicted Endpoint (-log C) | 3.39415           | 2.40947            | 3.00765                      |
| Distance                    | 0.662             | 0.681              | 0.710                        |
| Reference                   | ARZNAD 30;1398;80 | NIIRDN 6;609;82    | NIIRDN 6;688;82              |

## Model Applicability

Unknown features are fingerprint features in the query molecule, but not found or appearing too infrequently in the training set.

1. All properties and OPS components are within expected ranges.
2. Unknown ECFP\_2 feature: 128986386: [\*]N=C(/C)[c](:[\*]):[\*]
3. Unknown ECFP\_2 feature: 562081661: [\*]C(=NN=[\*])[\*]
4. Unknown ECFP\_2 feature: -819426257: [\*]C(=NN=[\*])[\*]
5. Unknown ECFP\_2 feature: 189949281: [\*]N=C\1/S[\*]=[\*]N1[\*]
6. Unknown ECFP\_2 feature: -934225701: [\*]C(=[\*])C1=N[\*][\*]S1
7. Unknown FCFP\_6 feature: 16: [\*][c](:[\*]):[\*]
8. Unknown FCFP\_6 feature: 1618154665: [\*][c](:[\*]):[cH]:[cH]:[\*]
9. Unknown FCFP\_6 feature: 580960234: [\*]C(=NN=[\*])[\*]
10. Unknown FCFP\_6 feature: 675799546: [\*]=C1[\*][\*]=NN1[c](:[\*]):[\*]
11. Unknown FCFP\_6 feature: 1747237384: [\*]:[cH]:n:[cH]:[\*]
12. Unknown FCFP\_6 feature: 71476542: [\*]:[c](:[\*])Cl

## Feature Contribution

### Top features for positive contribution

| Fingerprint | Bit/Smiles | Feature Structure | Score |
|-------------|------------|-------------------|-------|
|             |            |                   |       |

|                                        |             |                                                                                                                      |        |
|----------------------------------------|-------------|----------------------------------------------------------------------------------------------------------------------|--------|
| ECFP_6                                 | 642810091   | 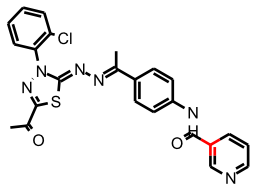<br><chem>[*][c](:[*]):[*]</chem> | 0.281  |
| ECFP_6                                 | -1897341097 | <br><chem>[*]N[*]</chem>          | 0.216  |
| ECFP_6                                 | 99947387    | <br><chem>[*]:[c](:[*])Cl</chem>  | 0.181  |
| Top Features for negative contribution |             |                                                                                                                      |        |
| Fingerprint                            | Bit/Smiles  | Feature Structure                                                                                                    | Score  |
| ECFP_6                                 | -817402818  | <br><chem>[*]Cl</chem>          | -0.263 |
| ECFP_6                                 | 655739385   | <br><chem>[*]N=[*]</chem>       | -0.239 |

|        |           |                                                                                                 |        |
|--------|-----------|-------------------------------------------------------------------------------------------------|--------|
| ECFP_6 | 734603939 | 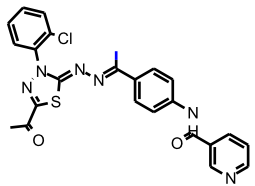 <p>[*]C</p> | -0.201 |
|--------|-----------|-------------------------------------------------------------------------------------------------|--------|

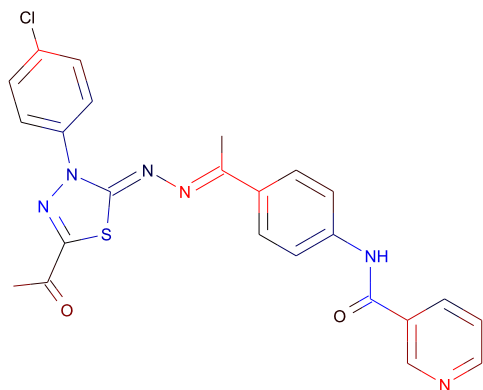

C<sub>24</sub>H<sub>19</sub>ClN<sub>6</sub>O<sub>2</sub>S

Molecular Weight: 490.96465

ALogP: 4.258

Rotatable Bonds: 6

Acceptors: 8

Donors: 1

## Model Prediction

Prediction: 0.247

Unit: g/kg\_body\_weight

Mahalanobis Distance: 24.3

Mahalanobis Distance p-value: 3.27e-027

Mahalanobis Distance: The Mahalanobis distance (MD) is a generalization of the Euclidean distance that accounts for correlations among the X properties. It is calculated as the distance to the center of the training data. The larger the MD, the less trustworthy the prediction.

Mahalanobis Distance p-value: The p-value gives the fraction of training data with an MD greater than or equal to the one for the given sample, assuming normally distributed data. The smaller the p-value, the less trustworthy the prediction. For highly non-normal X properties (e.g., fingerprints), the MD p-value is wildly inaccurate.

## Structural Similar Compounds

| Name                        | ACEMETACIN        | bis-OXATIN ACETATE | PRASOZIN .HCl (HCl STRIPPED) |
|-----------------------------|-------------------|--------------------|------------------------------|
| Structure                   |                   |                    |                              |
| Actual Endpoint (-log C)    | 4.235             | 1.717              | 2.294                        |
| Predicted Endpoint (-log C) | 3.39415           | 2.40947            | 3.00765                      |
| Distance                    | 0.655             | 0.687              | 0.712                        |
| Reference                   | ARZNAD 30;1398;80 | NIIRDN 6;609;82    | NIIRDN 6;688;82              |

## Model Applicability

Unknown features are fingerprint features in the query molecule, but not found or appearing too infrequently in the training set.

1. All properties and OPS components are within expected ranges.
2. Unknown ECFP\_2 feature: 128986386: [\*]N=C(/C)[c](:[\*]):[\*]
3. Unknown ECFP\_2 feature: 562081661: [\*]C(=NN=[\*])[\*]
4. Unknown ECFP\_2 feature: -819426257: [\*]C(=NN=[\*])[\*]
5. Unknown ECFP\_2 feature: 189949281: [\*]N=C\1/S[\*]=[\*]N1[\*]
6. Unknown ECFP\_2 feature: -934225701: [\*]C(=[\*])C1=N[\*][\*]S1
7. Unknown FCFP\_6 feature: 16: [\*][c](:[\*]):[\*]
8. Unknown FCFP\_6 feature: 1618154665: [\*][c](:[\*]):[cH]:[cH]:[\*]
9. Unknown FCFP\_6 feature: 580960234: [\*]C(=NN=[\*])[\*]
10. Unknown FCFP\_6 feature: 675799546: [\*]=C1[\*][\*]=NN1[c](:[\*]):[\*]
11. Unknown FCFP\_6 feature: 71476542: [\*]:[c](:[\*])Cl
12. Unknown FCFP\_6 feature: 1747237384: [\*]:[cH]:n:[cH]:[\*]

## Feature Contribution

### Top features for positive contribution

| Fingerprint | Bit/Smiles | Feature Structure | Score |
|-------------|------------|-------------------|-------|
|             |            |                   |       |

|                                        |             |                                                                                                         |        |
|----------------------------------------|-------------|---------------------------------------------------------------------------------------------------------|--------|
| ECFP_6                                 | 642810091   | 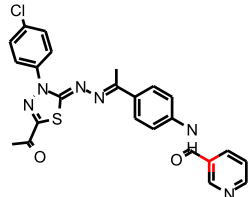<br>[*][c](:[*]):[*] | 0.281  |
| ECFP_6                                 | -1897341097 | <br>[*]N[*]          | 0.216  |
| ECFP_6                                 | 99947387    | <br>[*]:[c](:[*])Cl  | 0.181  |
| Top Features for negative contribution |             |                                                                                                         |        |
| Fingerprint                            | Bit/Smiles  | Feature Structure                                                                                       | Score  |
| ECFP_6                                 | -817402818  | <br>[*]Cl           | -0.263 |
| ECFP_6                                 | 655739385   | <br>[*]N=[*]       | -0.239 |

|        |           |                                                                                                 |        |
|--------|-----------|-------------------------------------------------------------------------------------------------|--------|
| ECFP_6 | 734603939 | 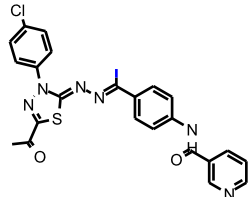 <p>[*]C</p> | -0.201 |
|--------|-----------|-------------------------------------------------------------------------------------------------|--------|



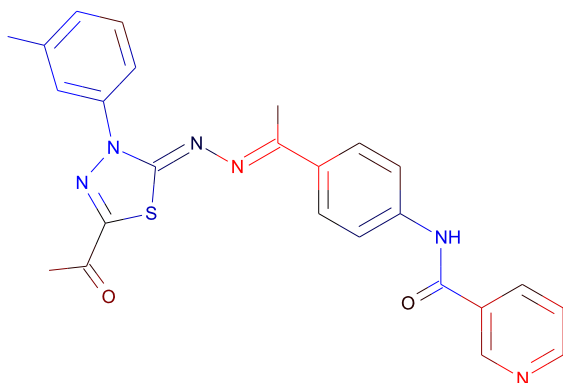

$C_{25}H_{22}N_6O_2S$

Molecular Weight: 470.54617

ALogP: 4.08

Rotatable Bonds: 6

Acceptors: 8

Donors: 1

## Model Prediction

Prediction: 0.418

Unit: g/kg\_body\_weight

Mahalanobis Distance: 24.2

Mahalanobis Distance p-value: 6.26e-027

Mahalanobis Distance: The Mahalanobis distance (MD) is a generalization of the Euclidean distance that accounts for correlations among the X properties. It is calculated as the distance to the center of the training data. The larger the MD, the less trustworthy the prediction.

Mahalanobis Distance p-value: The p-value gives the fraction of training data with an MD greater than or equal to the one for the given sample, assuming normally distributed data. The smaller the p-value, the less trustworthy the prediction. For highly non-normal X properties (e.g., fingerprints), the MD p-value is wildly inaccurate.

## Structural Similar Compounds

| Name                        | ACEMETACIN        | bis-OXATIN ACETATE | PRASOZIN .HCl (HCl STRIPPED) |
|-----------------------------|-------------------|--------------------|------------------------------|
| Structure                   |                   |                    |                              |
| Actual Endpoint (-log C)    | 4.235             | 1.717              | 2.294                        |
| Predicted Endpoint (-log C) | 3.39415           | 2.40947            | 3.00765                      |
| Distance                    | 0.659             | 0.662              | 0.674                        |
| Reference                   | ARZNAD 30;1398;80 | NIIRDN 6;609;82    | NIIRDN 6;688;82              |

## Model Applicability

Unknown features are fingerprint features in the query molecule, but not found or appearing too infrequently in the training set.

1. All properties and OPS components are within expected ranges.
2. Unknown ECFP\_2 feature: 128986386: [\*]N=C(/C)[c](:[\*]):[\*]
3. Unknown ECFP\_2 feature: 562081661: [\*]C(=NN=[\*])[\*]
4. Unknown ECFP\_2 feature: -819426257: [\*]C(=NN=[\*])[\*]
5. Unknown ECFP\_2 feature: 189949281: [\*]N=C\1/S[\*]=[\*]N1[\*]
6. Unknown ECFP\_2 feature: -934225701: [\*]C(=[\*])C1=N[\*][\*]S1
7. Unknown FCFP\_6 feature: 16: [\*][c](:[\*]):[\*]
8. Unknown FCFP\_6 feature: 1618154665: [\*][c](:[\*]):[cH]:[cH]:[\*]
9. Unknown FCFP\_6 feature: 580960234: [\*]C(=NN=[\*])[\*]
10. Unknown FCFP\_6 feature: 675799546: [\*]=C1[\*][\*]=NN1[c](:[\*]):[\*]
11. Unknown FCFP\_6 feature: 1747237384: [\*]:[cH]:n:[cH]:[\*]

## Feature Contribution

### Top features for positive contribution

| Fingerprint | Bit/Smiles | Feature Structure | Score |
|-------------|------------|-------------------|-------|
|             |            |                   |       |

|                                        |             |                                                                                                                                                                   |        |
|----------------------------------------|-------------|-------------------------------------------------------------------------------------------------------------------------------------------------------------------|--------|
| ECFP_6                                 | 642810091   | 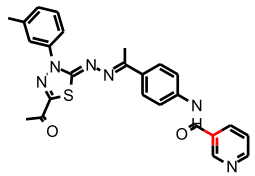<br><chem>[*][c](:[*]):[*]</chem>                                              | 0.281  |
| ECFP_6                                 | -1897341097 | <br><chem>[*]N[*]</chem>                                                       | 0.216  |
| FCFP_6                                 | -1549192822 | <br><chem>[*]N=C(C)[c](:[*])</chem><br><chem>:[*]</chem>                       | 0.168  |
| Top Features for negative contribution |             |                                                                                                                                                                   |        |
| Fingerprint                            | Bit/Smiles  | Feature Structure                                                                                                                                                 | Score  |
| FCFP_6                                 | 1676877079  | <br><chem>[*]N([*])[c]1:[cH]:[*]</chem><br><chem>]:[cH]:[c](C):[cH]:1</chem> | -0.254 |
| ECFP_6                                 | 655739385   | <br><chem>[*]N=[*]</chem>                                                    | -0.239 |

|        |           |                                                                                                 |        |
|--------|-----------|-------------------------------------------------------------------------------------------------|--------|
| ECFP_6 | 734603939 | 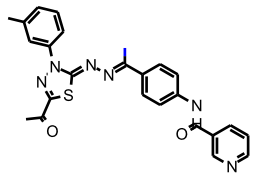 <p>[*]C</p> | -0.201 |
|--------|-----------|-------------------------------------------------------------------------------------------------|--------|

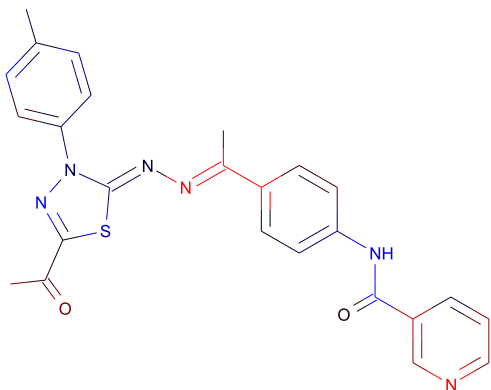

$C_{25}H_{22}N_6O_2S$

Molecular Weight: 470.54617

ALogP: 4.08

Rotatable Bonds: 6

Acceptors: 8

Donors: 1

## Model Prediction

Prediction: 0.33

Unit: g/kg\_body\_weight

Mahalanobis Distance: 24.2

Mahalanobis Distance p-value: 6.26e-027

Mahalanobis Distance: The Mahalanobis distance (MD) is a generalization of the Euclidean distance that accounts for correlations among the X properties. It is calculated as the distance to the center of the training data. The larger the MD, the less trustworthy the prediction.

Mahalanobis Distance p-value: The p-value gives the fraction of training data with an MD greater than or equal to the one for the given sample, assuming normally distributed data. The smaller the p-value, the less trustworthy the prediction. For highly non-normal X properties (e.g., fingerprints), the MD p-value is wildly inaccurate.

## Structural Similar Compounds

| Name                        | ACEMETACIN        | bis-OXATIN ACETATE | PRASOZIN .HCl (HCl STRIPPED) |
|-----------------------------|-------------------|--------------------|------------------------------|
| Structure                   |                   |                    |                              |
| Actual Endpoint (-log C)    | 4.235             | 1.717              | 2.294                        |
| Predicted Endpoint (-log C) | 3.39415           | 2.40947            | 3.00765                      |
| Distance                    | 0.660             | 0.663              | 0.675                        |
| Reference                   | ARZNAD 30;1398;80 | NIIRDN 6;609;82    | NIIRDN 6;688;82              |

## Model Applicability

Unknown features are fingerprint features in the query molecule, but not found or appearing too infrequently in the training set.

1. All properties and OPS components are within expected ranges.
2. Unknown ECFP\_2 feature: 128986386: [\*]N=C(/C)[c](:[\*]):[\*]
3. Unknown ECFP\_2 feature: 562081661: [\*]C(=NN=[\*])[\*]
4. Unknown ECFP\_2 feature: -819426257: [\*]C(=NN=[\*])[\*]
5. Unknown ECFP\_2 feature: 189949281: [\*]N=C\1/S[\*]=[\*]N1[\*]
6. Unknown ECFP\_2 feature: -934225701: [\*]C(=[\*])C1=N[\*][\*]S1
7. Unknown FCFP\_6 feature: 16: [\*][c](:[\*]):[\*]
8. Unknown FCFP\_6 feature: 1618154665: [\*][c](:[\*]):[cH]:[cH]:[\*]
9. Unknown FCFP\_6 feature: 580960234: [\*]C(=NN=[\*])[\*]
10. Unknown FCFP\_6 feature: 675799546: [\*]=C1[\*][\*]=NN1[c](:[\*]):[\*]
11. Unknown FCFP\_6 feature: 1747237384: [\*]:[cH]:n:[cH]:[\*]

## Feature Contribution

### Top features for positive contribution

| Fingerprint | Bit/Smiles | Feature Structure | Score |
|-------------|------------|-------------------|-------|
|             |            |                   |       |

|                                        |             |                                                                                                                         |        |
|----------------------------------------|-------------|-------------------------------------------------------------------------------------------------------------------------|--------|
| ECFP_6                                 | 642810091   | 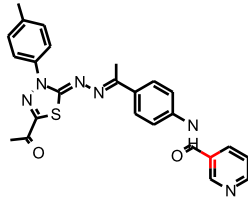<br><chem>[*][c](:[*]):[*]</chem>    | 0.281  |
| ECFP_6                                 | -1897341097 | <br><chem>[*]N[*]</chem>             | 0.216  |
| FCFP_6                                 | -1549192822 | <br><chem>[*]N=C(/C)[c](:[*])</chem> | 0.168  |
| Top Features for negative contribution |             |                                                                                                                         |        |
| Fingerprint                            | Bit/Smiles  | Feature Structure                                                                                                       | Score  |
| ECFP_6                                 | 655739385   | <br><chem>[*]N=[*]</chem>           | -0.239 |
| ECFP_6                                 | 734603939   | <br><chem>[*]C</chem>              | -0.201 |

|        |            |                                                                                                                                         |        |
|--------|------------|-----------------------------------------------------------------------------------------------------------------------------------------|--------|
| ECFP_6 | -210573707 | 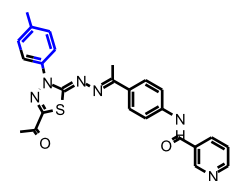<br><chem>[*][c]1:[*]:[cH]:[c](C):[cH]:[cH]:1</chem> | -0.122 |
|--------|------------|-----------------------------------------------------------------------------------------------------------------------------------------|--------|

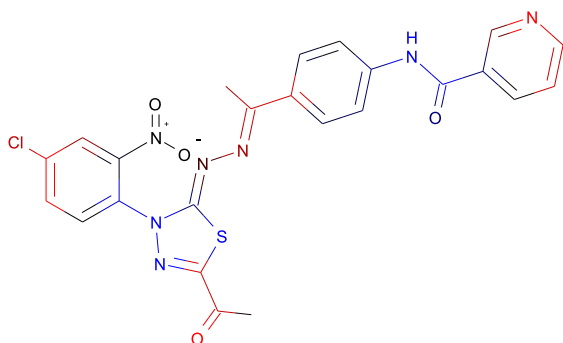

$C_{24}H_{18}ClN_7O_4S$

Molecular Weight: 535.96222

ALogP: 4.153

Rotatable Bonds: 7

Acceptors: 10

Donors: 1

## Model Prediction

Prediction: 0.353

Unit: g/kg\_body\_weight

Mahalanobis Distance: 28.6

Mahalanobis Distance p-value: 1.02e-053

Mahalanobis Distance: The Mahalanobis distance (MD) is a generalization of the Euclidean distance that accounts for correlations among the X properties. It is calculated as the distance to the center of the training data. The larger the MD, the less trustworthy the prediction.

Mahalanobis Distance p-value: The p-value gives the fraction of training data with an MD greater than or equal to the one for the given sample, assuming normally distributed data. The smaller the p-value, the less trustworthy the prediction. For highly non-normal X properties (e.g., fingerprints), the MD p-value is wildly inaccurate.

## Structural Similar Compounds

| Name                        | PHOSPHOROTHIOIC ACID; O;O'- (SULFONYLDI-p-PHENYLENE) O;O;O';O'-TETRAMETHYL ESTER | TEMEPHOS       | BROMOFENOXIME   |
|-----------------------------|----------------------------------------------------------------------------------|----------------|-----------------|
| Structure                   |                                                                                  |                |                 |
| Actual Endpoint (-log C)    | 2.397                                                                            | 2.669          | 2.622           |
| Predicted Endpoint (-log C) | 3.8515                                                                           | 3.65871        | 3.41798         |
| Distance                    | 0.768                                                                            | 0.803          | 0.813           |
| Reference                   | TXAPA9 21;315;72                                                                 | GUHAZ 6;493;73 | 85ARAE 2;203;77 |

## Model Applicability

Unknown features are fingerprint features in the query molecule, but not found or appearing too infrequently in the training set.

1. All properties and OPS components are within expected ranges.
2. Unknown ECFP\_2 feature: 1043790491: [\*][N+](=[\*])[\*]
3. Unknown ECFP\_2 feature: 781519895: [\*][O-]
4. Unknown ECFP\_2 feature: -934225701: [\*]C(=[\*])C1=N[\*][\*]S1
5. Unknown ECFP\_2 feature: 189949281: [\*]N=C\1/S[\*]=[\*]N1[\*]
6. Unknown ECFP\_2 feature: -1956535100: [\*][c](:[\*]):[c](:[cH]:[\*])[N+](=[\*])[\*]
7. Unknown ECFP\_2 feature: -819426257: [\*]C(=NN=[\*])[\*]
8. Unknown ECFP\_2 feature: 562081661: [\*]C(=NN=[\*])[\*]
9. Unknown ECFP\_2 feature: 128986386: [\*]N=C(/C)\[c](:[\*]):[\*]
10. Unknown ECFP\_2 feature: -215026467: [\*]:[c](:[\*])[N+](=O)[O-]
11. Unknown ECFP\_2 feature: 2104376220: [\*][N+](=O)[\*]
12. Unknown ECFP\_2 feature: -659271057: [\*][N+](=[\*])[O-]
13. Unknown FCFP\_6 feature: 16: [\*][c](:[\*]):[\*]
14. Unknown FCFP\_6 feature: 8: [\*][N+](=[\*])[\*]
15. Unknown FCFP\_6 feature: 5: [\*][O-]
16. Unknown FCFP\_6 feature: 580960234: [\*]C(=NN=[\*])[\*]
17. Unknown FCFP\_6 feature: 675799546: [\*]=C1[\*][\*]=NN1[c](:[\*]):[\*]

18. Unknown FCFP\_6 feature: -828984032: [\*][c](:[\*]):[c](:[cH]:[\*])[N+](=[\*])[\*]
19. Unknown FCFP\_6 feature: 1618154665: [\*][c](:[\*]):[cH]:[cH]:[\*]
20. Unknown FCFP\_6 feature: 71476542: [\*]:[c](:[\*])Cl
21. Unknown FCFP\_6 feature: 1747237384: [\*]:[cH]:n:[cH]:[\*]
22. Unknown FCFP\_6 feature: -1338588315: [\*]:[c](:[\*])[N+](=O)[O-]
23. Unknown FCFP\_6 feature: 1872392852: [\*][N+](=O)[\*]
24. Unknown FCFP\_6 feature: 260476081: [\*][N+](=[\*])[O-]

## Feature Contribution

### Top features for positive contribution

| Fingerprint | Bit/Smiles  | Feature Structure                                                                                                                 | Score |
|-------------|-------------|-----------------------------------------------------------------------------------------------------------------------------------|-------|
| ECFP_6      | 642810091   | 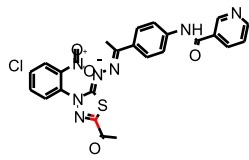<br>[*][c](:[*]):[*]                           | 0.281 |
| ECFP_6      | -1897341097 | <br>[*]N[*]                                    | 0.216 |
| ECFP_6      | 577592657   | <br>[*][c]1:[*]:[cH]:[cH]<br>:[c](Cl):[cH]:1 | 0.194 |

### Top Features for negative contribution

| Fingerprint | Bit/Smiles | Feature Structure | Score |
|-------------|------------|-------------------|-------|
|             |            |                   |       |



|        |            |                                                                                                     |        |
|--------|------------|-----------------------------------------------------------------------------------------------------|--------|
| ECFP_6 | -817402818 | 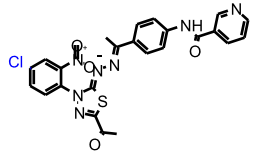 <p>[*]Cl</p>    | -0.263 |
| ECFP_6 | 655739385  |  <p>[*]N=[*]</p> | -0.239 |
| ECFP_6 | 734603939  |  <p>[*]C</p>     | -0.201 |

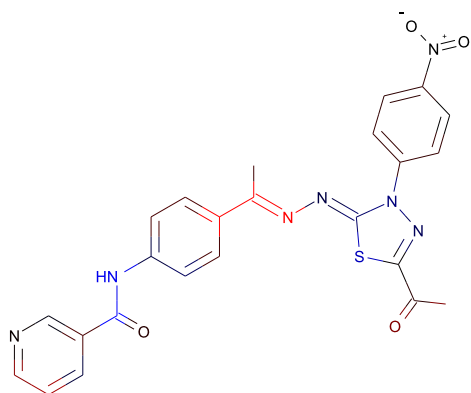

$C_{24}H_{19}N_7O_4S$

Molecular Weight: 501.51715

ALogP: 3.488

Rotatable Bonds: 7

Acceptors: 10

Donors: 1

## Model Prediction

Prediction: 0.272

Unit: g/kg\_body\_weight

Mahalanobis Distance: 28

Mahalanobis Distance p-value: 1.32e-049

Mahalanobis Distance: The Mahalanobis distance (MD) is a generalization of the Euclidean distance that accounts for correlations among the X properties. It is calculated as the distance to the center of the training data. The larger the MD, the less trustworthy the prediction.

Mahalanobis Distance p-value: The p-value gives the fraction of training data with an MD greater than or equal to the one for the given sample, assuming normally distributed data. The smaller the p-value, the less trustworthy the prediction. For highly non-normal X properties (e.g., fingerprints), the MD p-value is wildly inaccurate.

## Structural Similar Compounds

| Name                        | PHOSPHOROTHIOIC ACID; O;O'-(SULFONYLDI-p-PHENYLENE) O;O;O';O'-TETRAMETHYL ESTER | TEMEPHOS       | PHOSPHOROTHIOIC ACID; O;O-bis-p-(NITROPHENYL); O-ETHYL ESTER |
|-----------------------------|---------------------------------------------------------------------------------|----------------|--------------------------------------------------------------|
| Structure                   |                                                                                 |                |                                                              |
| Actual Endpoint (-log C)    | 2.397                                                                           | 2.669          | 3.759                                                        |
| Predicted Endpoint (-log C) | 3.8515                                                                          | 3.65871        | 4.23595                                                      |
| Distance                    | 0.758                                                                           | 0.803          | 0.809                                                        |
| Reference                   | TXAPA9 21;315;72                                                                | GUHAZ 6;493;73 | 85JCAE -;1169;86                                             |

## Model Applicability

Unknown features are fingerprint features in the query molecule, but not found or appearing too infrequently in the training set.

1. All properties and OPS components are within expected ranges.
2. Unknown ECFP\_2 feature: 1043790491: [\*][N+](=[\*])[\*]
3. Unknown ECFP\_2 feature: 781519895: [\*][O-]
4. Unknown ECFP\_2 feature: 128986386: [\*]N=C(/C)\[c](:[\*]):[\*]
5. Unknown ECFP\_2 feature: 562081661: [\*]C(=NN=[\*])[\*]
6. Unknown ECFP\_2 feature: -819426257: [\*]C(=NN=[\*])[\*]
7. Unknown ECFP\_2 feature: -179073144: [\*][N+](=[\*])[c](:[cH]:[\*]):[cH]:[\*]
8. Unknown ECFP\_2 feature: 189949281: [\*]N=C\1/S[\*]=[\*]N1[\*]
9. Unknown ECFP\_2 feature: -934225701: [\*]C(=[\*])C1=N[\*][\*]S1
10. Unknown ECFP\_2 feature: -215026467: [\*]:[c](:[\*])[N+](=O)[O-]
11. Unknown ECFP\_2 feature: 2104376220: [\*][N+](=O)[\*]
12. Unknown ECFP\_2 feature: -659271057: [\*][N+](=[\*])[O-]
13. Unknown FCFP\_6 feature: 16: [\*][c](:[\*]):[\*]
14. Unknown FCFP\_6 feature: 8: [\*][N+](=[\*])[\*]
15. Unknown FCFP\_6 feature: 5: [\*][O-]
16. Unknown FCFP\_6 feature: 1618154665: [\*][c](:[\*]):[cH]:[cH]:[\*]
17. Unknown FCFP\_6 feature: 1747237384: [\*]:[cH]:n:[cH]:[\*]

18. Unknown FCFP\_6 feature: 580960234: [\*]C(=NN=[\*])[\*]
19. Unknown FCFP\_6 feature: -828984032: [\*][c](:[\*]):[c](:[cH]:[\*])[N+](=[\*])[\*]
20. Unknown FCFP\_6 feature: 675799546: [\*]=C1[\*][\*]=NN1[c](:[\*]):[\*]
21. Unknown FCFP\_6 feature: -1338588315: [\*]:[c](:[\*])[N+](=O)[O-]
22. Unknown FCFP\_6 feature: 1872392852: [\*][N+](=O)[\*]
23. Unknown FCFP\_6 feature: 260476081: [\*][N+](=[\*])[O-]

## Feature Contribution

### Top features for positive contribution

| Fingerprint | Bit/Smiles  | Feature Structure                                                                                                    | Score |
|-------------|-------------|----------------------------------------------------------------------------------------------------------------------|-------|
| ECFP_6      | 642810091   | 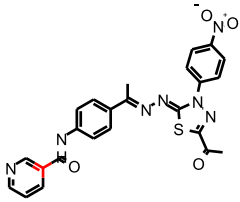<br>[*][c](:[*]):[*]              | 0.281 |
| ECFP_6      | -1897341097 | <br>[*]N[*]                       | 0.216 |
| FCFP_6      | -1549192822 | <br>[*]N=C(/C)[c](:[*])<br>:[*] | 0.168 |

### Top Features for negative contribution

| Fingerprint | Bit/Smiles | Feature Structure | Score |
|-------------|------------|-------------------|-------|
|             |            |                   |       |

|        |             |                                                                                                                         |        |
|--------|-------------|-------------------------------------------------------------------------------------------------------------------------|--------|
| ECFP_6 | 655739385   | 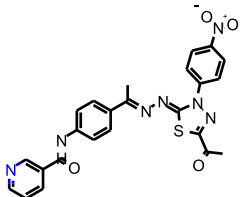 <p>[*]N=[*]</p>                     | -0.239 |
| ECFP_6 | 734603939   |  <p>[*]C</p>                         | -0.201 |
| FCFP_6 | -1549103449 |  <p>[*]NC(=O)[c](:[*]):[*]<br/>]</p> | -0.117 |

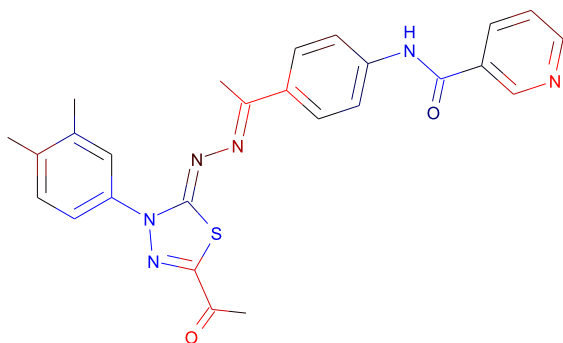

$C_{26}H_{24}N_6O_2S$

Molecular Weight: 484.57275

ALogP: 4.566

Rotatable Bonds: 6

Acceptors: 8

Donors: 1

## Model Prediction

Prediction: 0.331

Unit: g/kg\_body\_weight

Mahalanobis Distance: 24.5

Mahalanobis Distance p-value: 2.36e-028

Mahalanobis Distance: The Mahalanobis distance (MD) is a generalization of the Euclidean distance that accounts for correlations among the X properties. It is calculated as the distance to the center of the training data. The larger the MD, the less trustworthy the prediction.

Mahalanobis Distance p-value: The p-value gives the fraction of training data with an MD greater than or equal to the one for the given sample, assuming normally distributed data. The smaller the p-value, the less trustworthy the prediction. For highly non-normal X properties (e.g., fingerprints), the MD p-value is wildly inaccurate.

## Structural Similar Compounds

| Name                        | ACEMETACIN        | bis-OXATIN ACETATE | PRASOZIN .HCl (HCl STRIPPED) |
|-----------------------------|-------------------|--------------------|------------------------------|
| Structure                   |                   |                    |                              |
| Actual Endpoint (-log C)    | 4.235             | 1.717              | 2.294                        |
| Predicted Endpoint (-log C) | 3.39415           | 2.40947            | 3.00765                      |
| Distance                    | 0.675             | 0.686              | 0.718                        |
| Reference                   | ARZNAD 30;1398;80 | NIIRDN 6;609;82    | NIIRDN 6;688;82              |

## Model Applicability

Unknown features are fingerprint features in the query molecule, but not found or appearing too infrequently in the training set.

1. All properties and OPS components are within expected ranges.
2. Unknown ECFP\_2 feature: -934225701: [\*]C(=[\*])C1=N[\*][\*]S1
3. Unknown ECFP\_2 feature: 189949281: [\*]N=C\1/S[\*]=[\*]N1[\*]
4. Unknown ECFP\_2 feature: -819426257: [\*]C(=NN=[\*])[\*]
5. Unknown ECFP\_2 feature: 562081661: [\*]C(=NN=[\*])[\*]
6. Unknown ECFP\_2 feature: 128986386: [\*]N=C(/C)\[c](:[\*]):[\*]
7. Unknown FCFP\_6 feature: 16: [\*][c](:[\*]):[\*]
8. Unknown FCFP\_6 feature: 580960234: [\*]C(=NN=[\*])[\*]
9. Unknown FCFP\_6 feature: 675799546: [\*]=C1[\*][\*]=NN1[c](:[\*]):[\*]
10. Unknown FCFP\_6 feature: 1618154665: [\*][c](:[\*]):[cH]:[cH]:[\*]
11. Unknown FCFP\_6 feature: 1747237384: [\*]:[cH]:n:[cH]:[\*]

## Feature Contribution

### Top features for positive contribution

| Fingerprint | Bit/Smiles | Feature Structure | Score |
|-------------|------------|-------------------|-------|
|             |            |                   |       |

|                                        |             |                                                                                                                                    |        |
|----------------------------------------|-------------|------------------------------------------------------------------------------------------------------------------------------------|--------|
| ECFP_6                                 | 642810091   | 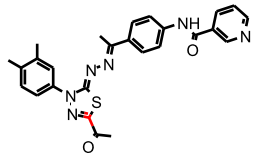<br>[*][c](:[*]):[*]                            | 0.281  |
| ECFP_6                                 | 2147419938  | <br>[*][c](:[*]):[c](C):[cH]:[*]                | 0.263  |
| ECFP_6                                 | -1897341097 | <br>[*]N[*]                                     | 0.216  |
| Top Features for negative contribution |             |                                                                                                                                    |        |
| Fingerprint                            | Bit/Smiles  | Feature Structure                                                                                                                  | Score  |
| FCFP_6                                 | 1676877079  | <br>[*]N([*])[c]1:[cH]:[*]:[cH]:[c](C):[cH]:1 | -0.254 |
| ECFP_6                                 | 655739385   | <br>[*]N=[*]                                  | -0.239 |

|        |           |                                                                                                                               |        |
|--------|-----------|-------------------------------------------------------------------------------------------------------------------------------|--------|
| ECFP_6 | 734603939 | 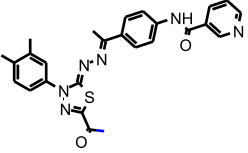 <p data-bbox="1478 305 1524 334">[*]C</p> | -0.201 |
|--------|-----------|-------------------------------------------------------------------------------------------------------------------------------|--------|

# Sorafenib

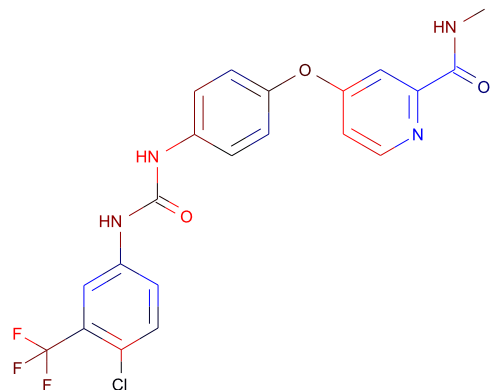
$$\text{C}_{21}\text{H}_{16}\text{ClF}_3\text{N}_4\text{O}_3$$

Molecular Weight: 464.82494

|ALogP: 4.175

Rotatable Bonds: 6

Acceptors: 4

Donors: 3

## Model Prediction

Prediction: 0.823

Unit: g/kg\_body\_weight

Mahalanobis Distance: 21

Mahalanobis Distance p-value: 1.93e-012

**Mahalanobis Distance:** The Mahalanobis distance (MD) is a generalization of the Euclidean distance that accounts for correlations among the X properties. It is calculated as the distance to the center of the training data. The larger the MD, the less trustworthy the prediction.

Mahalanobis Distance p-value: The p-value gives the fraction of training data with an MD greater than or equal to the one for the given sample, assuming normally distributed data. The smaller the p-value, the less trustworthy the prediction. For highly non-normal X properties (e.g., fingerprints), the MD p-value is wildly inaccurate.

## TOPKAT Rat Oral LD50

## Structural Similar Compounds

| Name                        | FLUBENDAZOLE                                                                        | PHOSPHORAMIDOTHIOIC ACID; ACETIMIDOYL-; O;O-bis-(p-CHLOROPHENYL)ESTER               | BEZAFIBRATE                                                                         |
|-----------------------------|-------------------------------------------------------------------------------------|-------------------------------------------------------------------------------------|-------------------------------------------------------------------------------------|
| Structure                   | 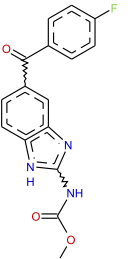 |  |  |
| Actual Endpoint (-log C)    | 2.088                                                                               | 5.006                                                                               | 1.946                                                                               |
| Predicted Endpoint (-log C) | 2.69288                                                                             | 3.23989                                                                             | 2.54395                                                                             |
| Distance                    | 0.697                                                                               | 0.703                                                                               | 0.721                                                                               |
| Reference                   | YRTMA6 9;11;78                                                                      | FMCHA2 -,C149;89                                                                    | ARZNAD 30;2023;80                                                                   |

## Model Applicability

Unknown features are fingerprint features in the query molecule, but not found or appearing too infrequently in the training set.

1. All properties and OPS components are within expected ranges.
2. Unknown FCFP\_6 feature: 16: [\*][c](:[\*]):[\*]
3. Unknown FCFP\_6 feature: 71476542: [\*]:[c](:[\*])Cl
4. Unknown FCFP\_6 feature: 1747237384: [\*]:[cH]:n:[cH]:[\*]
5. Unknown FCFP\_6 feature: 1618154665: [\*][c](:[\*]):[cH]:[cH]:[\*]
6. Unknown FCFP\_6 feature: 136686699: [\*]NC

## Feature Contribution

### Top features for positive contribution

| Fingerprint | Bit/Smiles | Feature Structure | Score |
|-------------|------------|-------------------|-------|
|             |            |                   |       |



|                                        |             |                                                                                                                       |        |
|----------------------------------------|-------------|-----------------------------------------------------------------------------------------------------------------------|--------|
| FCFP_6                                 | 71953198    | 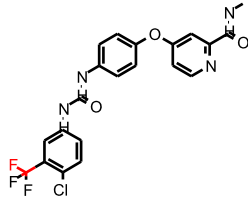<br><chem>[*]C([*])([*])F</chem>   | 0.392  |
| ECFP_6                                 | -1046436026 | <br><chem>[*]F</chem>              | 0.349  |
| ECFP_6                                 | 642810091   | <br><chem>[*][c](:[*]):[*]</chem>  | 0.281  |
| Top Features for negative contribution |             |                                                                                                                       |        |
| Fingerprint                            | Bit/Smiles  | Feature Structure                                                                                                     | Score  |
| ECFP_6                                 | 226796801   | <br><chem>[*]C([*])([*])F</chem> | -0.32  |
| ECFP_6                                 | -817402818  | <br><chem>[*]Cl</chem>           | -0.263 |

|        |            |                                                                                                                                                  |        |
|--------|------------|--------------------------------------------------------------------------------------------------------------------------------------------------|--------|
| ECFP_6 | -176455838 | 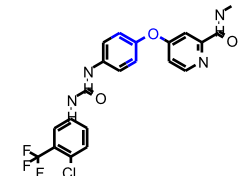<br><chem>[*]O[c](:[cH]:[*]):[c</chem><br><chem>H]:[*]</chem> | -0.257 |
|--------|------------|--------------------------------------------------------------------------------------------------------------------------------------------------|--------|
